# Supplementary material for: How do quantum chemical descriptors shape hydrogen atom abstraction reactivity in cupric-superoxo species? A combined DFT and machine learning perspective
Source: Royal Society of Chemistry journal article supplement (doi:10.1039/d4qi00701h), 2024-01-01
Supplement: d4qi00701h1.pdf [file d4qi00701h1.pdf]

## Supporting Information

# How Do Quantum Chemical Descriptors Shape the Hydrogen Atom Abstraction Reactivity in Cupric-superoxo Species? A Combined DFT and Machine Learning Perspective

Chandrasekhar Nettem and Gopalan Rajaraman\*

\*Department of Chemistry, Indian Institute of Technology Bombay, Mumbai-400076, India.  
E-mail:rajaraman@chem.iitb.ac.in

| S.No | Table of Contents                                                                                                                                                                                                                                           | Page No |
|------|-------------------------------------------------------------------------------------------------------------------------------------------------------------------------------------------------------------------------------------------------------------|---------|
| 1    | Computational Methods                                                                                                                                                                                                                                       | S5-S6   |
| 2    | DFT computed spin density plots of triplet spin state (S=1) of catalysts                                                                                                                                                                                    | S7      |
| 3    | Spin density plots of S=0 of catalysts                                                                                                                                                                                                                      | S8      |
| 4    | Frontier molecular orbital diagram of catalyst <b>1a</b>                                                                                                                                                                                                    | S9      |
| 5    | Non-covalent interaction (NCI) plots of complexes                                                                                                                                                                                                           | S10     |
| 6    | Reduced density gradient plots of complexes                                                                                                                                                                                                                 | S11     |
| 7    | Localised orbital locator (LOL) of catalysts                                                                                                                                                                                                                | S12     |
| 8    | Molecular graphs of different catalysts along with their bond critical points                                                                                                                                                                               | S13     |
| 9    | Different catalysts ( <b>1a-5a</b> ) and substrates ( <b>A1-A3</b> ) and reactions ( <b>R1-R15</b> )                                                                                                                                                        | S14     |
| 10   | DFT Optimized Reactant complex structure's                                                                                                                                                                                                                  | S15     |
| 11   | Orbital evolution diagram for HAT by copper superoxo catalysts <b>1a-5a</b>                                                                                                                                                                                 | S16     |
| 12   | Product complex structures                                                                                                                                                                                                                                  | S17     |
| 13   | DFT optimized ground state geometries of catalysts                                                                                                                                                                                                          | S18     |
| 14   | Free energy profile for hydrogen abstraction reactions ( <b>R6-R10</b> )                                                                                                                                                                                    | S19     |
| 15   | Energy profile for hydrogen abstraction reactions ( <b>R11-R15</b> )                                                                                                                                                                                        | S20     |
| 16   | Plots of (a) Regression Analysis between $\Delta G_{PCET}^{\#}$ Vs $\Delta G_2^{\#}$ (b) $\Delta G_2^{\#}$ vs $\{\Delta G_{PCET}^{\#}, BV\}$ (c) $\Delta G_{DFT}^{\#}$ vs $\{\Delta G_{PCET}^{\#}, HB, BV\}$ (d) $\Delta E^{\#}$ vs and $\Delta E_{strain}$ | S21     |
| 17   | NCI plots of transition state structures ( ${}^3TS_{R1}$ - ${}^3TS_{R5}$ )                                                                                                                                                                                  | S22     |
| 18   | NCI plots of transition state structures ( ${}^3TS_{R6}$ - ${}^3TS_{R10}$ )                                                                                                                                                                                 | S23     |
| 19   | Temperature dependence of KIE of different reactions                                                                                                                                                                                                        | S24-S25 |
| 20   | Relaxed scan of different catalysts by varying Cu1---O1 distance <b>1a-5a</b>                                                                                                                                                                               | S26     |
| 21   | DFT optimized Transition state geometries of complexes ${}^3TS_{1d}^{1a}$ - ${}^3TS_{5d}^{5a}$                                                                                                                                                              | S27     |
| 22   | DFT optimized ground state geometries of complexes <b>1d-5d</b>                                                                                                                                                                                             | S28     |
| 23   | Plots of (a) Regression Analysis between $\Delta G_3^{\#}$ Vs $\{BV\}$ (b) $\Delta G_3^{\#}$ Vs $\{HB\}$ (c) $\Delta G_3^{\#}$ Vs $\{HB, BV\}$                                                                                                              | S29     |
| 24   | Valence Bond State Correlation Diagram (VBSCD) for the simple H-abstraction reaction $X\cdot + H-Y \rightarrow XH + Y\cdot$                                                                                                                                 | S30-S31 |

|    |                                                                                                                                                                                                                                     |         |
|----|-------------------------------------------------------------------------------------------------------------------------------------------------------------------------------------------------------------------------------------|---------|
| 25 | Plots of (a) Regression Analysis between $\Delta E_{VB}^{\#}$ Vs $\Delta G_2^{\#}$ (c) $\Delta G_2^{\#}$ vs and $\{\Delta E_{VB}^{\#}, BV\}$ (c) n $\Delta G_2^{\#}$ vs and $\{\Delta E_{VB}^{\#}, BV, HB\}$                        | S32     |
| 26 | (a) Different Pathways for HAA (b) HAA reaction Showing the formation of Reactant complex product complex                                                                                                                           | S33-S34 |
| 27 | The thermodynamic cycles for connecting four structures                                                                                                                                                                             | S35-S36 |
| 28 | The Linear regression model performance for prediction of $\Delta G_2^{\#}$                                                                                                                                                         | S37     |
| 29 | Selected structural parameters of different catalysts <b>1a-5a</b> .                                                                                                                                                                | S38     |
| 30 | Selected atoms spin densities of different catalysts used in this study <b>1a-5a</b> .                                                                                                                                              | S39     |
| 31 | Variation of energy with change of dihedral angle catalysts <b>2a-5a</b> .                                                                                                                                                          | S40     |
| 32 | Electron density( $\rho_{BCP}$ ), potential energy density (V), localized orbital locator values (LOL), Wiberg bond indices(WBI) at BCP from natural bond orbital analysis, and binding energies(B.E) of important hydrogen bonds . | S41-S42 |
| 33 | Buried volume (BV) of catalysts ( <b>1a-5a</b> ) and substrates ( <b>A1-A3</b> )                                                                                                                                                    | S43     |
| 34 | Selected structural parameters of reactant complex of reactions <b>R1-R15</b> .                                                                                                                                                     | S44     |
| 35 | Selected structural parameters of transition states of all reactions <b>R1-R15</b> .                                                                                                                                                | S45     |
| 36 | Selected atom spin densities of transition states of all reactions <b>R1-R15</b> .                                                                                                                                                  | S46     |
| 37 | Selected structural parameters of product complexes of reactions <b>R1-R15</b> .                                                                                                                                                    | S47     |
| 38 | Selected atom spin densities of product complexes of all reactions <b>R1-R15</b> .                                                                                                                                                  | S48     |
| 39 | Selected structural parameters of <b>1b-5b</b> .                                                                                                                                                                                    | S49     |
| 40 | Selected atom spin densities of different catalysts used in this study <b>1b-5b</b> .                                                                                                                                               | S50     |
| 41 | Energy decomposition analysis for all reactions used in this study.                                                                                                                                                                 | S51     |
| 42 | Wigner transmission coefficients of reactions <b>R1-R15</b> at different temperatures.                                                                                                                                              | S52     |
| 43 | ZCT transmission coefficients of reactions <b>R1-R15</b> .                                                                                                                                                                          | S53     |
| 44 | SCT transmission coefficients of reactions <b>R1-R15</b> .                                                                                                                                                                          | S54     |
| 45 | Wiberg bond index of transition states of reactions <b>R1-R15</b> .                                                                                                                                                                 | S55     |
| 46 | Natural charges of Transition states of reactions <b>R1-R15</b> .                                                                                                                                                                   | S56     |
| 47 | Kinetic isotopic effect (KIE) of reactions <b>R1-R15</b> .                                                                                                                                                                          | S57     |
| 48 | Kinetic isotopic effect (KIE) and Imaginary frequencies of transition states                                                                                                                                                        | S58     |

|    |                                                                                                                                |              |
|----|--------------------------------------------------------------------------------------------------------------------------------|--------------|
|    | of all reactions <b>R1-R15</b> (* Wiberg bond order).                                                                          |              |
| 49 | Structural parameters of different catalysts used in this study <b>1d-5d</b>                                                   | S59          |
| 50 | Selected atom spin densities of different complexes <b>1d-5d</b> .                                                             | S60          |
| 51 | Energetics of different spin states of complexes <b>1d-5d</b>                                                                  | S61          |
| 52 | Selected structural parameters of transition state of dimerization.                                                            | S62          |
| 53 | Selected atom spin densities of transition state of dimerization.                                                              | S63          |
| 54 | Free energies and activation free energies of all reaction <b>R1-R15</b> .                                                     | S64          |
| 55 | Vertical bond strength (D) and bond dissociation energies (BDE) of different reactions <b>R1-R15</b>                           | S65          |
| 56 | Different Descriptors and target variables used in the regression model.                                                       | S66          |
| 57 | Different Descriptors values and target variables values at 298 K values                                                       | S67          |
| 58 | Different Regression models (to predict T01 using feature combination {F13+F09+F08+F07}) performance metrics for T01.          | S68          |
| 59 | Linear Regression model (to predict T01 using feature combination {F13+F09+F08+F07}) features coefficients and their p-values. | S68          |
| 60 | Different Regression models features (to predict T02 using feature combination {F09+F07+F01}) performance metrics for T02.     | S69          |
| 61 | Linear Regression model features (to predict T02 using feature combination { F09+F07+F01}) coefficients and their p-values.    | S69          |
| 62 | Selected bond lengths of optimised catalyst <b>1a</b> and analogue complex crystal structure.                                  | S70          |
| 63 | Triplet-singlet gaps of <b>1a-5a</b> with different functionals                                                                | S71          |
| 64 | Triplet-singlet gaps for <b>1a-5a</b>                                                                                          | S72          |
| 65 | Activation energies of reactions <b>R1-R5</b>                                                                                  | S73          |
| 66 | Different catalyst structures ( <b>6a-7a</b> ) which was not seen during model                                                 | S74          |
| 67 | Free energies and activation free energies of two unseen HAT reactions <b>R16-R17</b>                                          | S75          |
| 68 | Different Descriptors values for reactions <b>R16-R17</b>                                                                      | S75          |
| 69 | References                                                                                                                     | S76-<br>S77  |
| 70 | Co-ordinates                                                                                                                   | S78-<br>S281 |

## Computational Methods

DFT computations employing the dispersion corrected Unrestricted Becke3LYP (B3LYP) hybrid functional was used in conjunction with a double  $\zeta$  quality LanL2DZ basis set with Los Alamos effective core potential for metal Cu and 6-31G(d) basis set for the rest of the atoms such as H, C, O, N. Molecular geometries were optimised without any constraints using G09 suite of programs<sup>1</sup>. At the same level of theory, frequency calculations have been performed to identify the nature of the species and to compute enthalpic and entropic corrections and therefore all the reported energies are free energies, unless otherwise stated. Further intrinsic reaction coordinates (IRC) were performed on selected geometries to affirm the correct nature of the transition state and polarizable continuum model (PCM) was employed to incorporate solvent effects and these calculations were performed using same functional at TZVP basis set for all atoms. Tetrahydrofuran was used as the solvent as employed in the experiments. Further analysis such as NBO (Natural bond orbital), AIM (Atoms in Molecules), Localized orbital locator (LOL), Energy decomposition analysis (EDA) and NCI (Non-covalent Interactions) were performed on the optimized geometries employing G09, and Multiwfn 3.7<sup>2</sup>. The iso surfaces of RDG were rendered by VMD 1.9.1 program.<sup>3</sup> Kinetic isotopic effect calculations were performed using Jacob Bigeleisen equation<sup>4</sup> and tunneling correction to the kinetic barrier were calculated using Pilgrim software employing age-McIver algorithm.<sup>5, 6</sup> For all examined reactions, the minimal energy path (MEP) was followed in mass-scaled coordinates (with scaling mass = 1 amu) and Hessian computations every 5 steps using the Page-McIver algorithm.<sup>6</sup> Machine learning studies were carried out utilizing the linear regression, Lasso, Adaboost<sup>7</sup>, Random Forest<sup>8</sup>, and extreme Gradient Boosting (XGBoost) models<sup>9 10 11</sup>. The EPR property calculations have been performed in Orca 4.2<sup>12</sup> version software. The starting coordinates for the EPR calculations have been obtained by DFT calculations in the Gaussian09 suite of programs as stated earlier.<sup>1</sup> The B3LYP hybrid functional<sup>13-15</sup> and def2-TZVP basis set has been used for all atoms for EPR property calculations. The DLPNO-CCSD(T) method, utilizing the cc-pVTZ basis set and incorporating the No Frozen Core and TIGHTPNO approximations, was employed to calculate precise energies. The optimized coordinates from DFT calculations conducted using the ORCA program were utilized in this process.<sup>16, 17</sup> Magnetic exchange interactions are calculated using B3LYP functional. The magnetic exchange interaction between Metal Cu(II) and O<sub>2</sub><sup>•-</sup> radical is described by the following spin Hamiltonian,  $\hat{H} = -J S_1 S_2$  here  $J$  is the isotropic exchange coupling constant.

Using the online SambVCA web programme, we derived percent buried volume (%BV) steric metrics to gauge the steric environment around each metal superoxo centre and substrate reactive C-H bond. We defined the negative z-axis as passing through the proximal oxygen centre and copper (for metal superoxo) and the xz plane as containing an additional atom bonded to the copper. We then centred the calculation on the proximal oxygen atom (for metal superoxo) We included hydrogen atoms in the computation, removed the distal oxygen atom from the calculation, and left all other variables at their default values (using Bondi radii scaled by 1.17, a sphere radius of 3.5 angstroms, and a mesh setting of 0.10 angstroms).<sup>18</sup>

Strength of H-bond interactions was quantified using the binding energy (BE), predicted based on the electron density at the bond critical point ( $\rho_{\text{BCP}}$ ) according to the following equation<sup>19</sup> i.e.,  $\text{B.E.} = [(-332.34 * \rho_{\text{BCP(a.u.)}} - 1.0661)] * 4.184 (\text{kJ/mol})$ .

For all reactions (each metal superoxo-substrate combination) assessed here, we calculated the free energies of proton coupled electron transfer ( $\Delta G_{PCET}$ ), free energy of proton transfer ( $\Delta G_{PT}$ ) free energy of electron transfer ( $\Delta G_{ET}$ ), and the asynchronicity ( $\eta$ ) and reorganization energy ( $\lambda$ ) according to the definition given by Srnec and coworkers. (See Figure S24) The effective acidity constant ( $\Delta P_{eff}^{k_a}$ ), effective reduction potential ( $\Delta E_{eff}^o$ ), and proton-coupled reduction potential ( $\Delta E^o(H)$ ) were also calculated using the methodology provided by Srnec and colleagues (See Figure S25). The methodology to calculate activation barriers of reactions from Valence bond theory ( $\Delta G_{VB}^\#$ ) is adapted from the work of Shaik and co-workers (See ESI Figure S23).

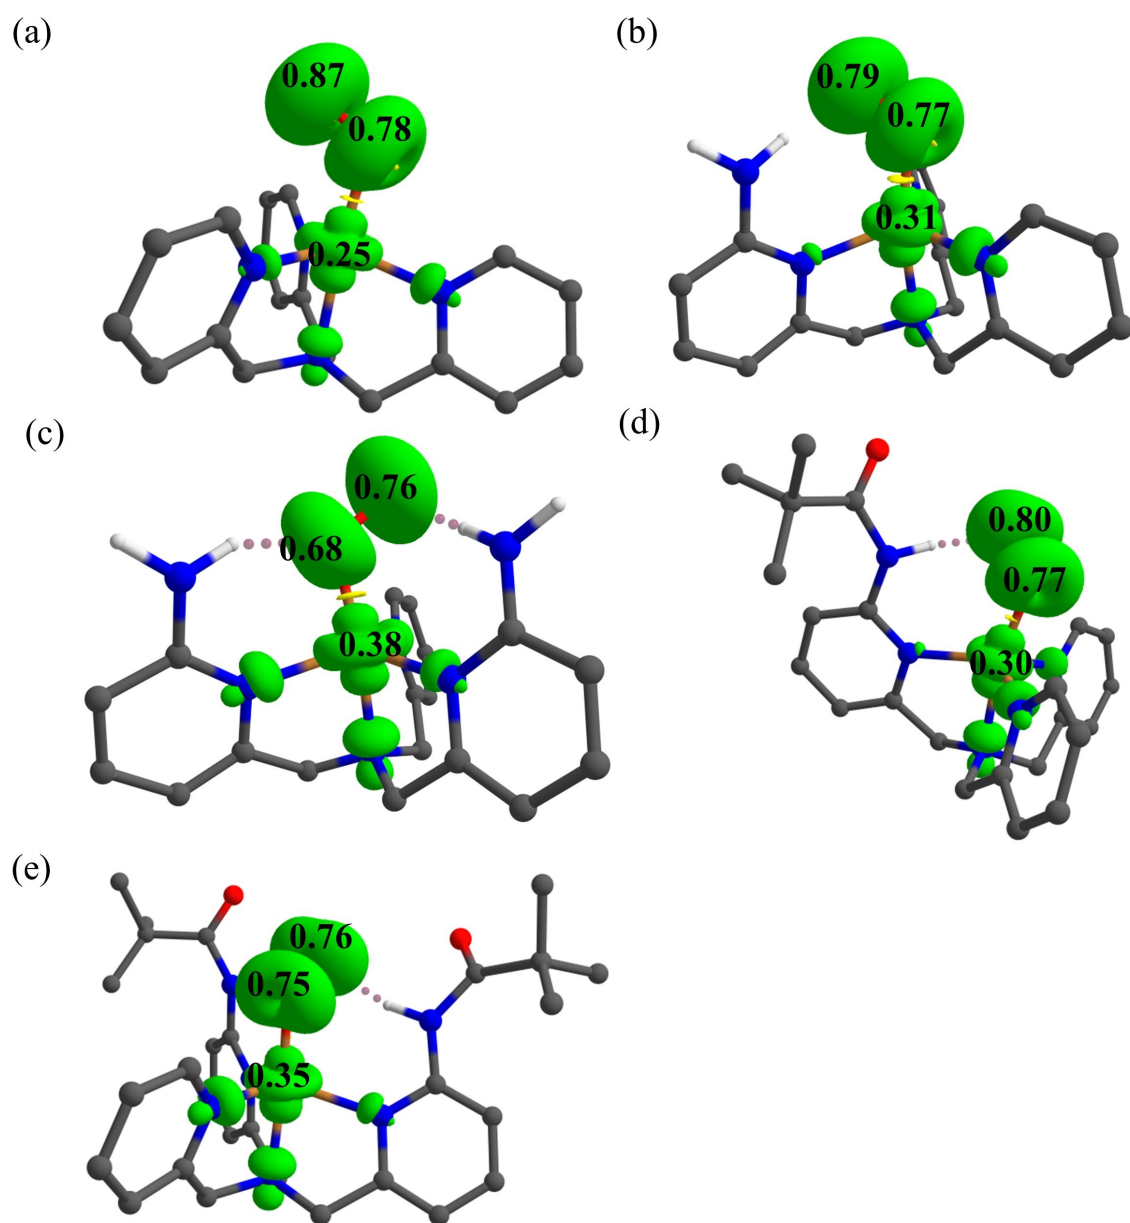

Figure S1: DFT computed spin density plots of triplet spin state ( $S=1$ ) of catalyst (a) **1a** (b) **2a** (c) **3a** (d) **4a** (e) **5a**

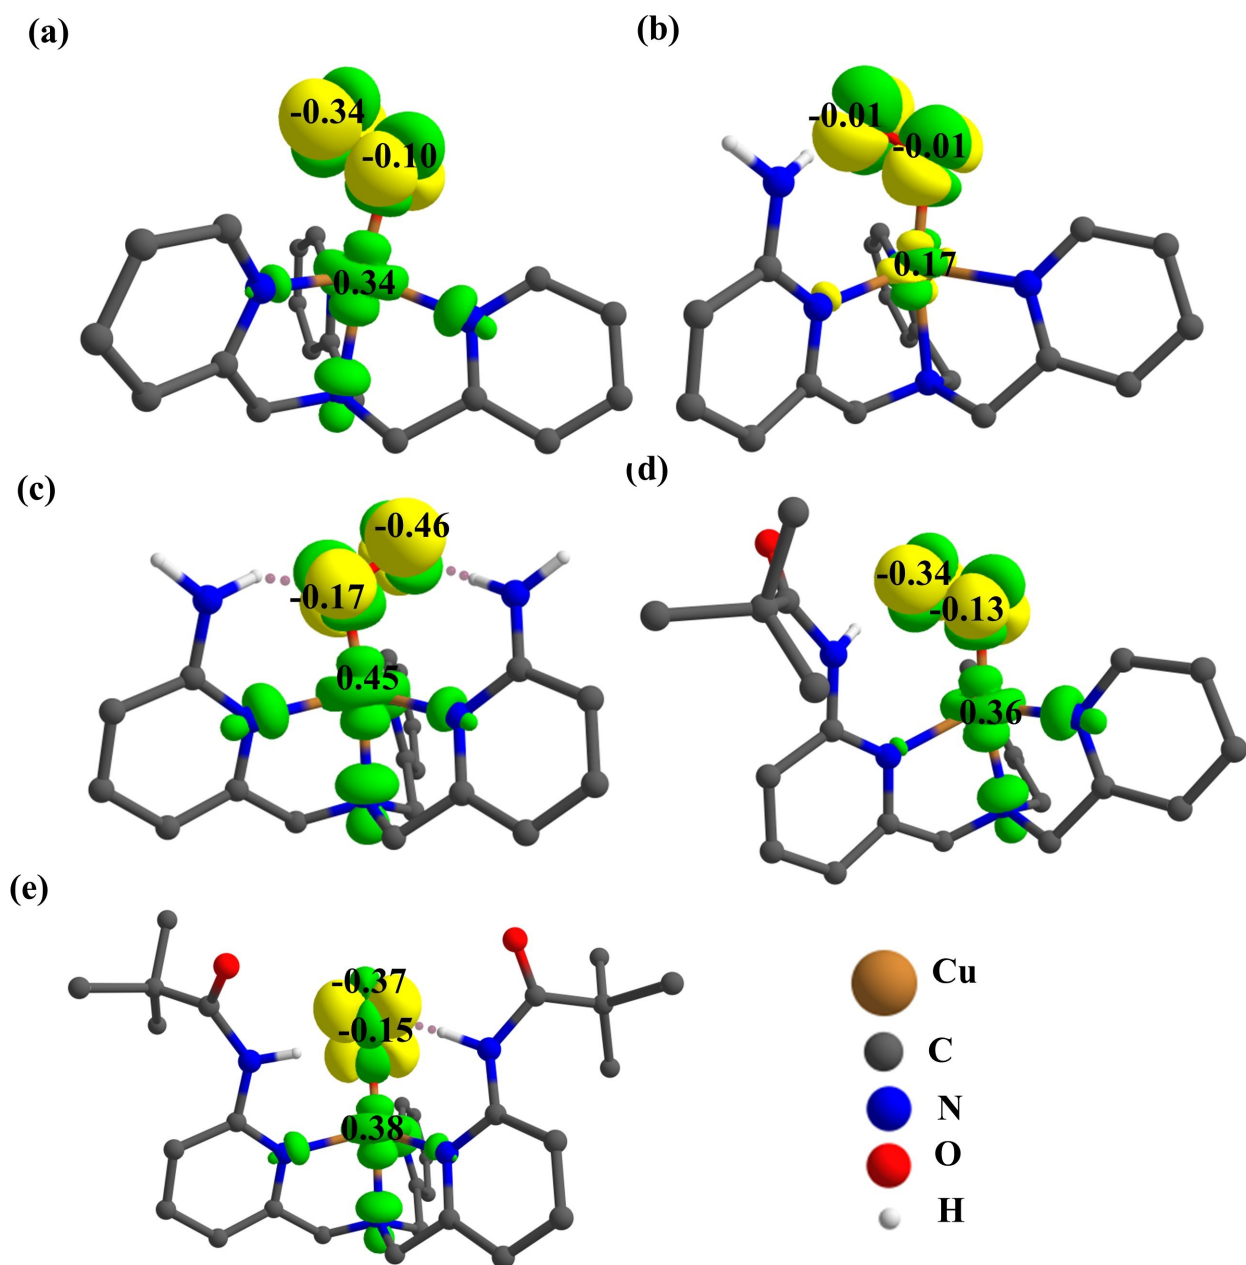

Figure S2: Spin density plots of S=0 of catalyst (a) **1a** (b) **2a** (c) **3a** (d) **4a** (e) **5a** (green and yellow colors are alpha and beta spin densities respectively).



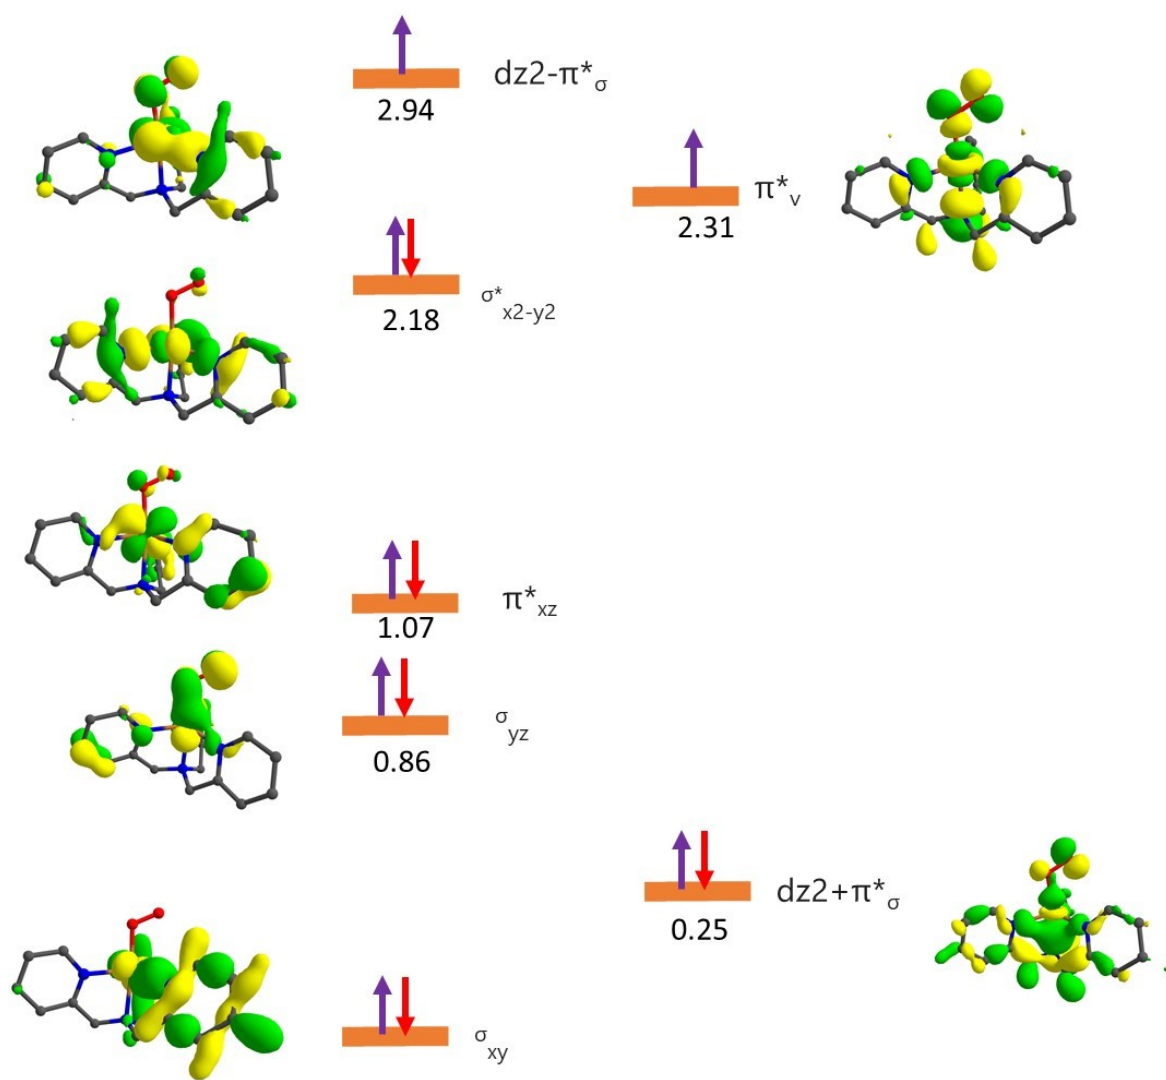

Figure S3: Frontier molecular orbital diagram of catalyst **1a** (Energy are given in eV)

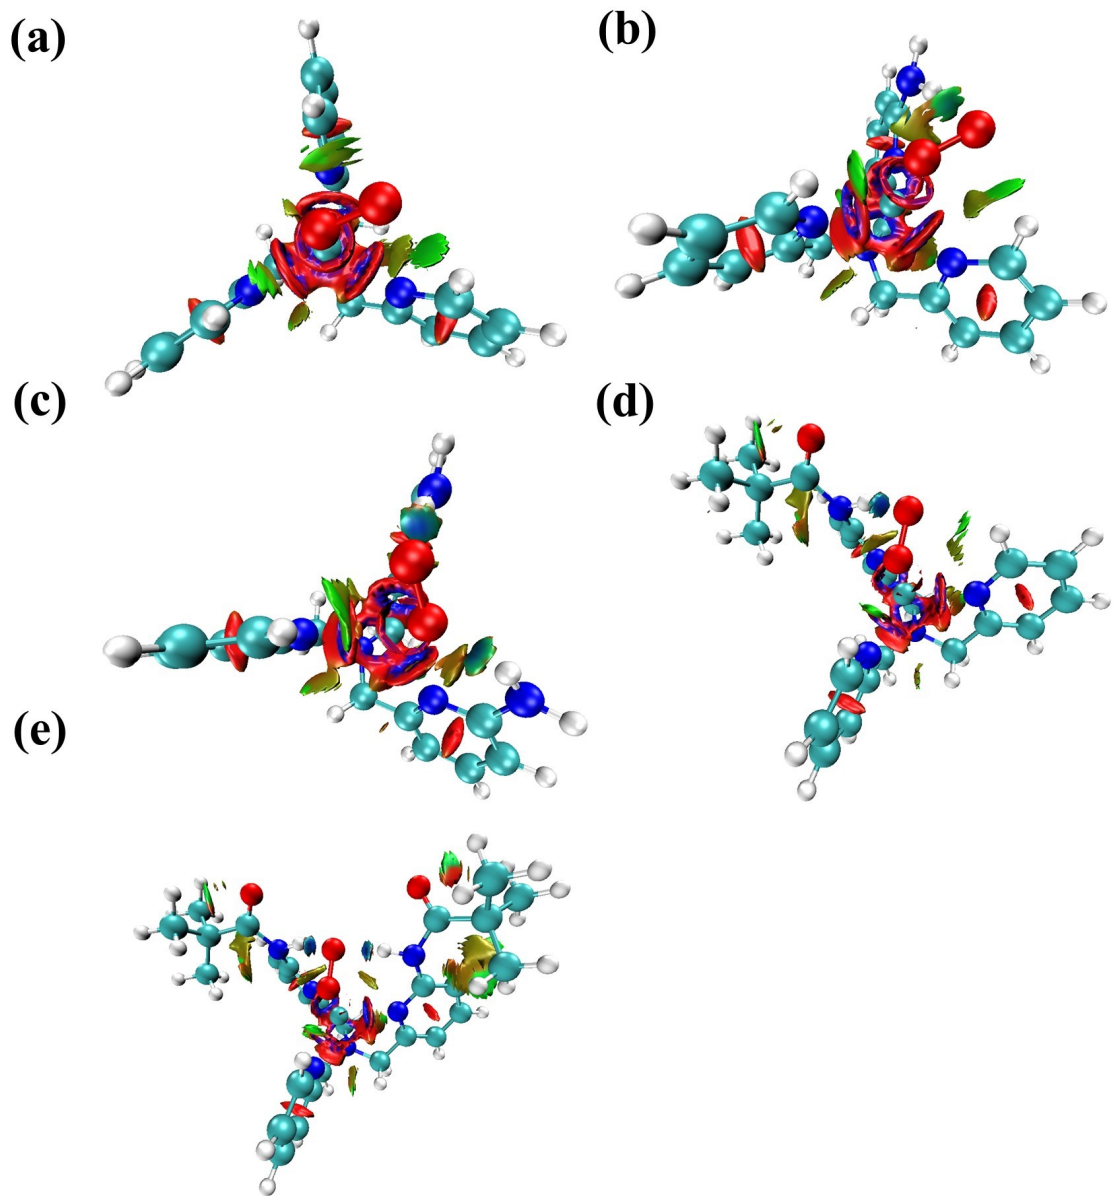

Figure S4: Non-covalent interaction (NCI) plots of complexes (a)1a (b)2a (c)3a (d)4a (e)5a

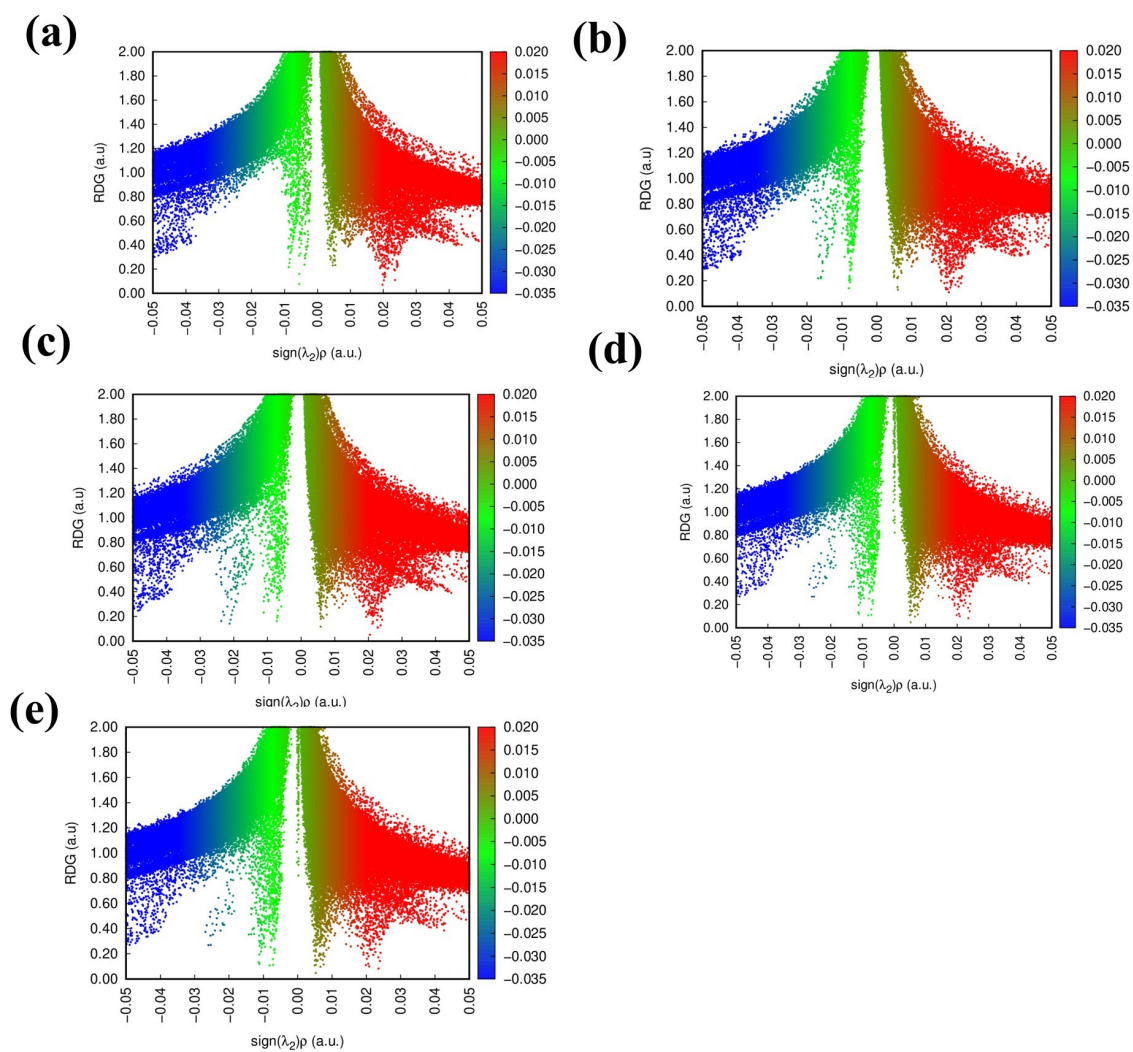

Figure S5: Reduced density gradient plots of complexes (a)1a (b)2a (c)3a (d)4a (e) 5a

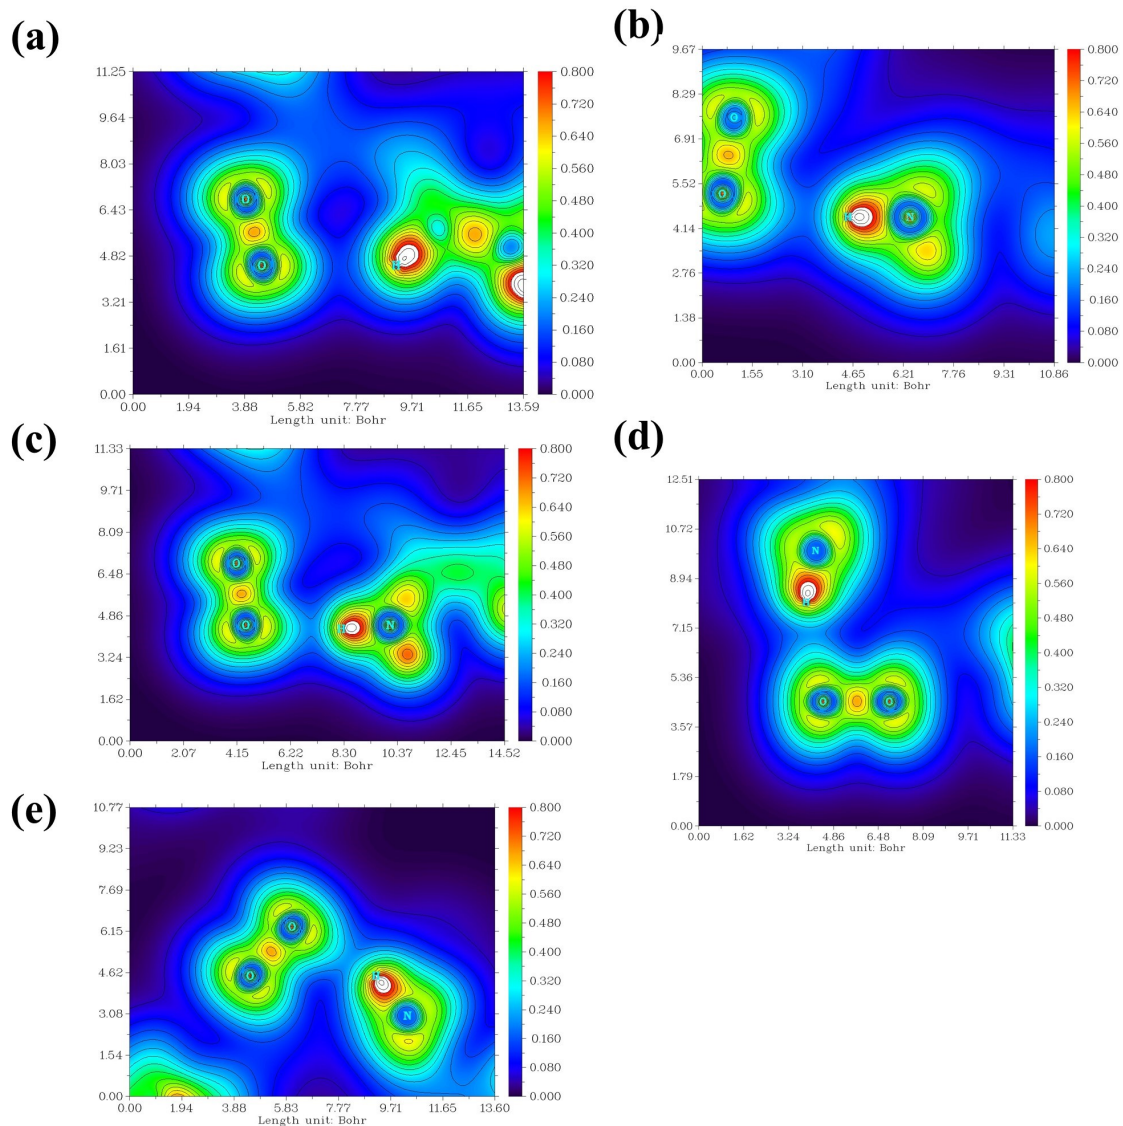

Figure S6: Localised orbital locator (LOL) of catalysts (a) **1a** (b) **2a** (c) **3a** (d) **4a** (e) **5a**

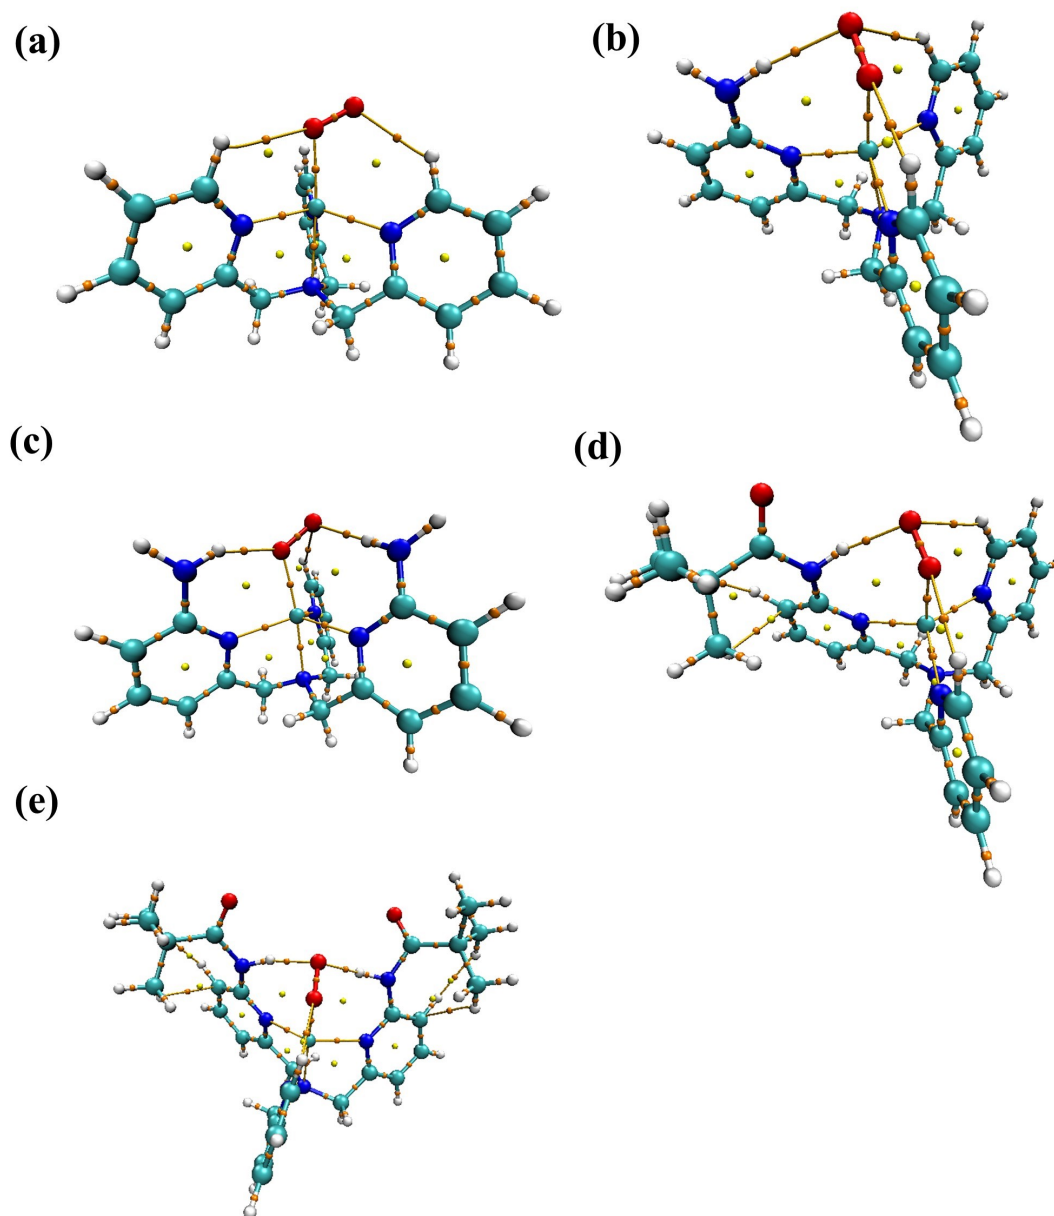

Figure S7: Molecular graphs of different catalysts along with their bond critical points (a) **1a** (b) **2a** (c) **3a** (d) **4a** (e) **5a** (Color code: yellow, ring critical point and green, cage critical point)

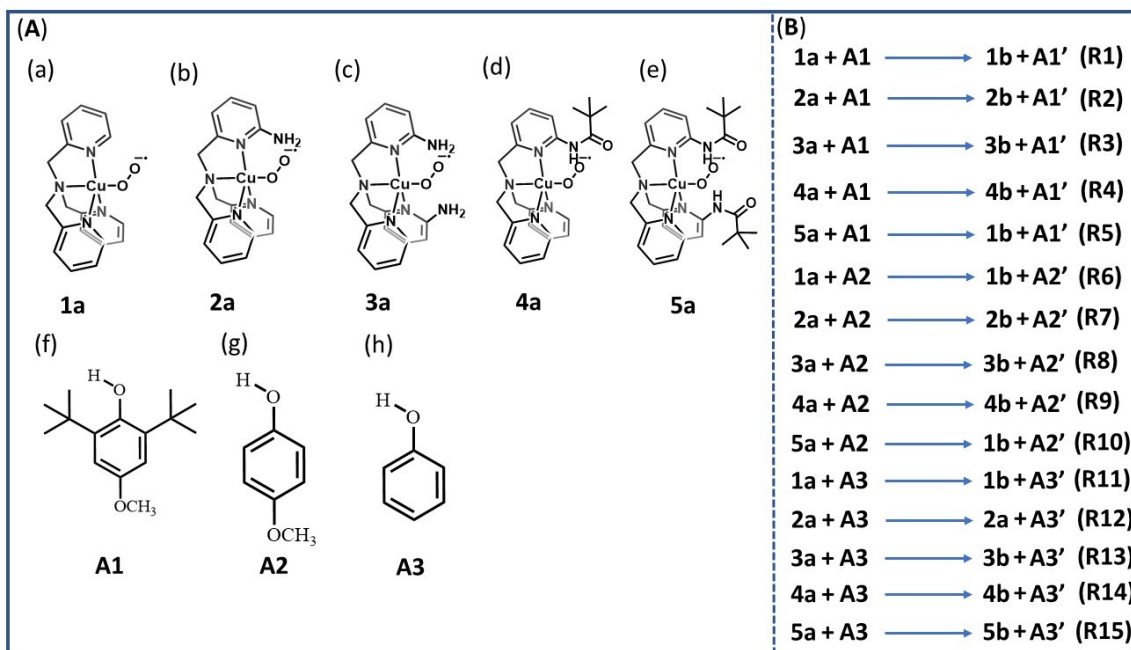

Figure S8: Different catalysts (**1a-5a**) and substrates (**A1-A3**) and reactions (**R1-R15**) under the study

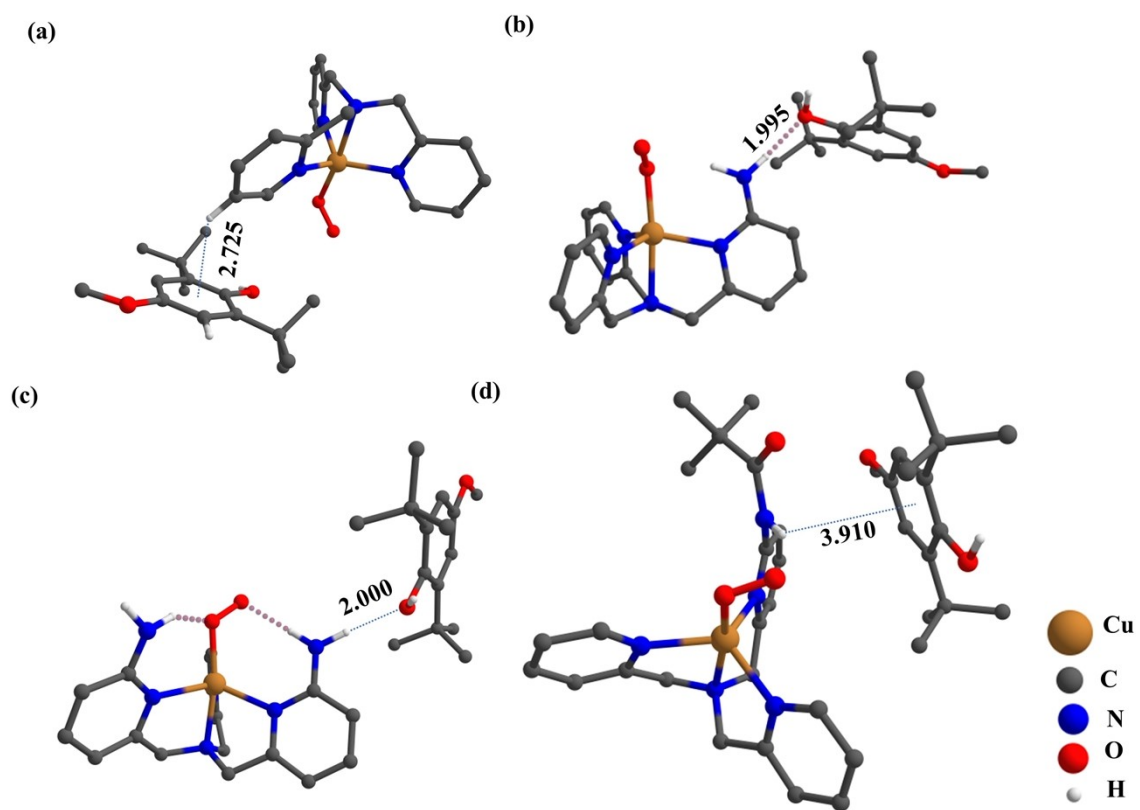

Figure S9: DFT Optimized Reactant complex structure's (a)  ${}^3\text{RC}_{\text{R1}}$  (b)  ${}^3\text{RC}_{\text{R2}}$  (c)  ${}^3\text{RC}_{\text{R3}}$  (d)  ${}^3\text{RC}_{\text{R4}}$  (bond distances are given in Å)

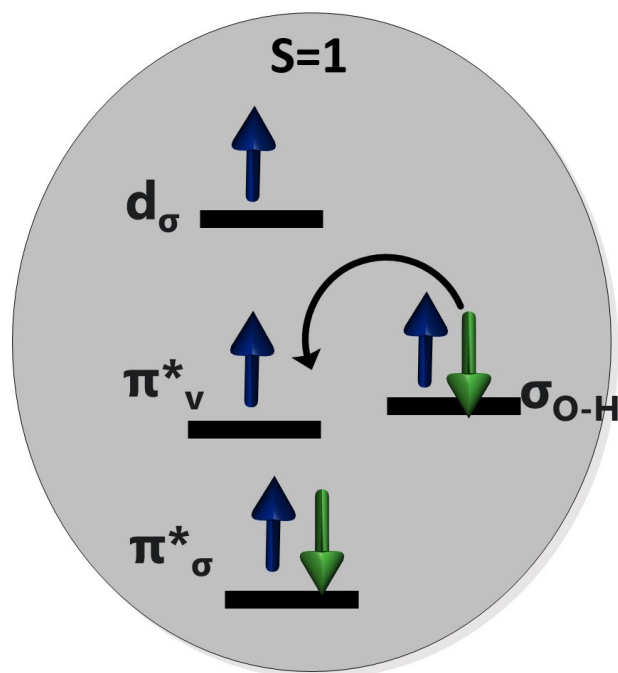

Figure S10: Orbital evolution diagram for HAT by copper superoxo catalysts **1a-5a**



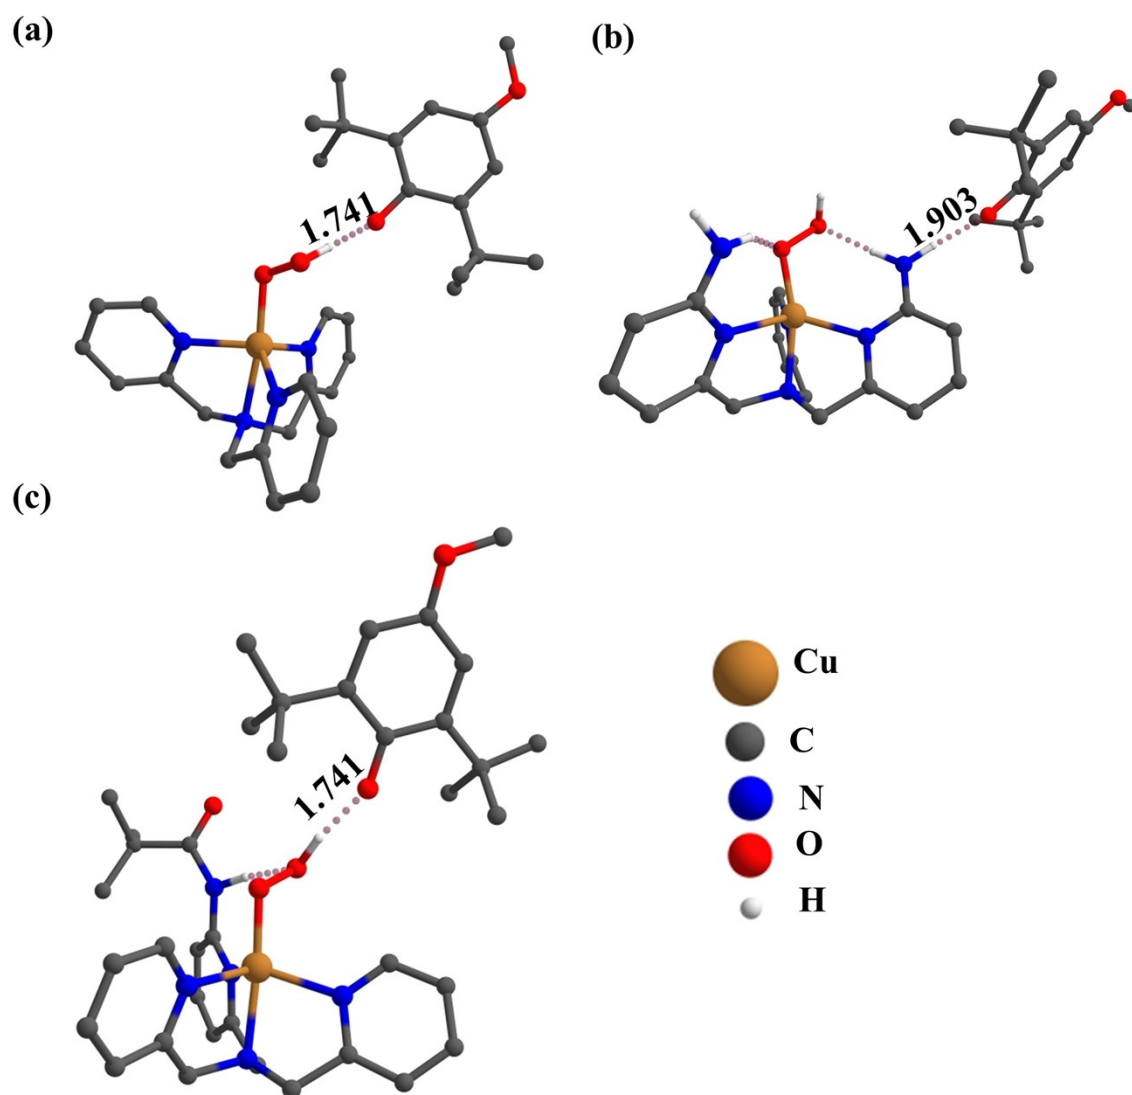

Figure S11: Product complex structures (a)  ${}^3\text{PC}_{\text{R1}}$  (b)  ${}^3\text{PC}_{\text{R3}}$  (c)  ${}^3\text{PC}_{\text{R4}}$  (bond distances are given in Å)

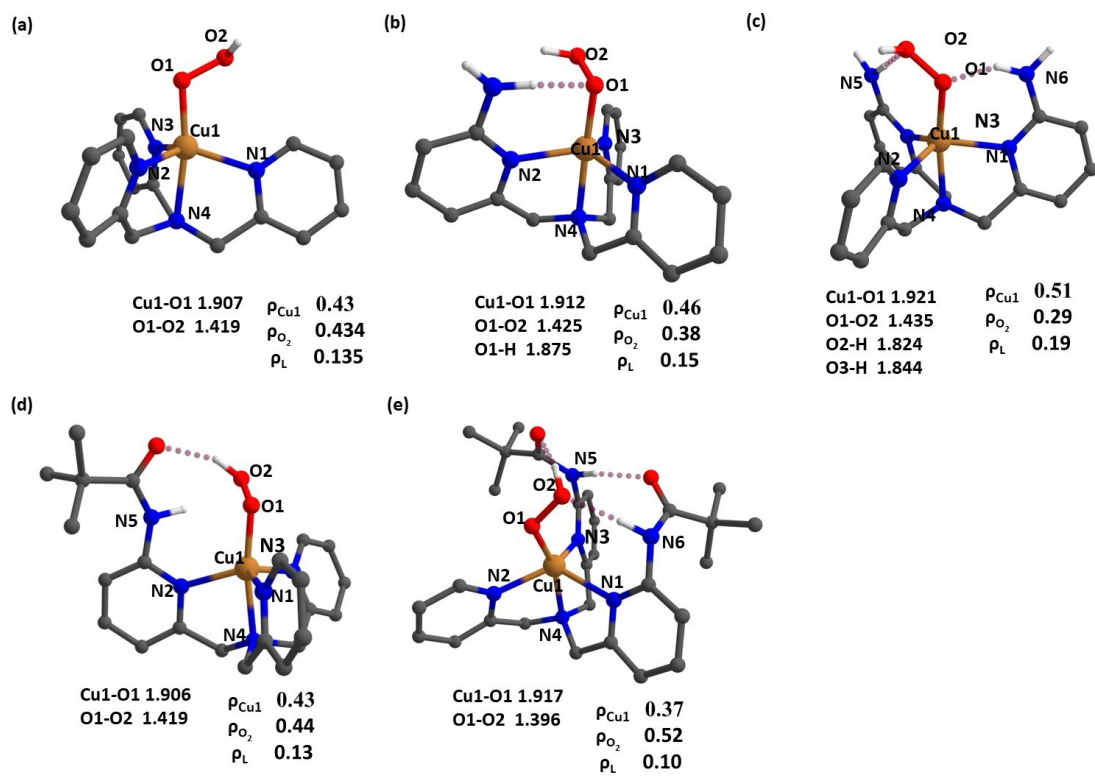

Figure S12: DFT optimized ground state geometries of catalysts (a) **1b** (b) **2b** (c) **3b** (d) **4b** (e) **5b**. (All bond distances are given in Å)

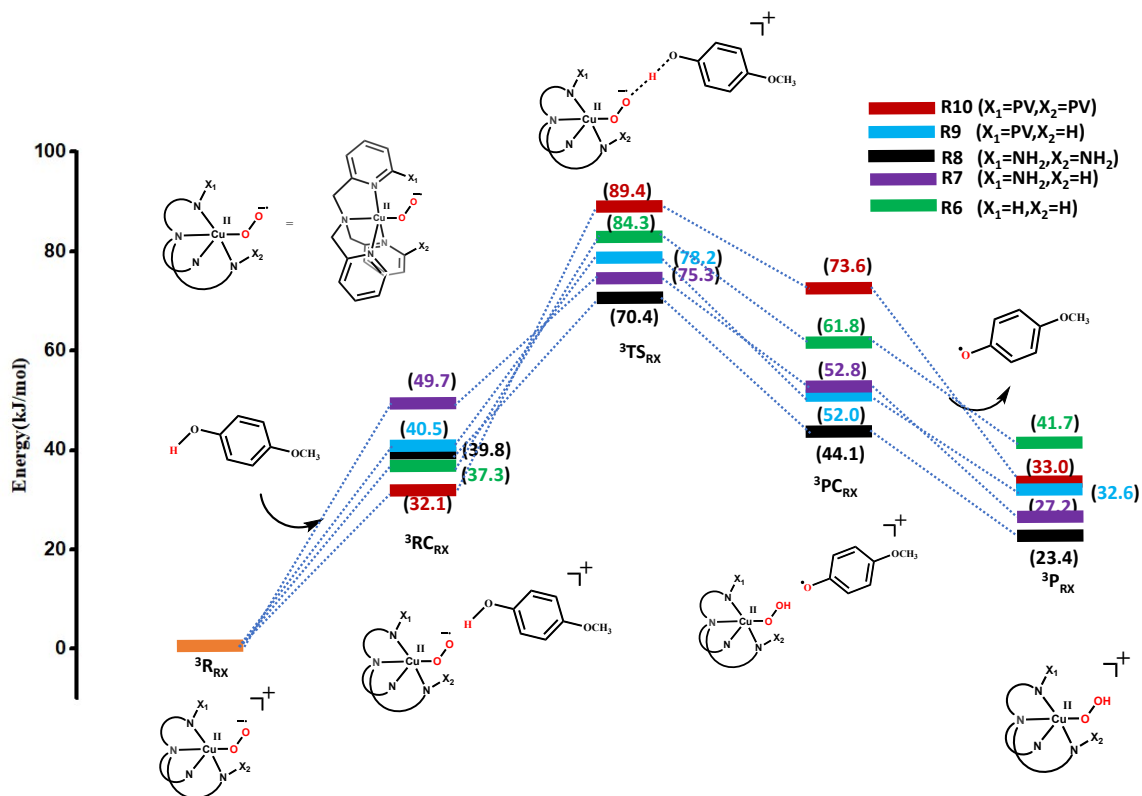

Figure S13: Energy profile for hydrogen atom abstraction (HAT) from p-methoxy phenol by **1a** (green; R1), **2a** (violet; R2), **3a** (black; R3), **4a** (blue; R4) and **5a** (brown; R5). (All energies are reported in kJ/mol and with reference to individual reactants shown in the orange color line)

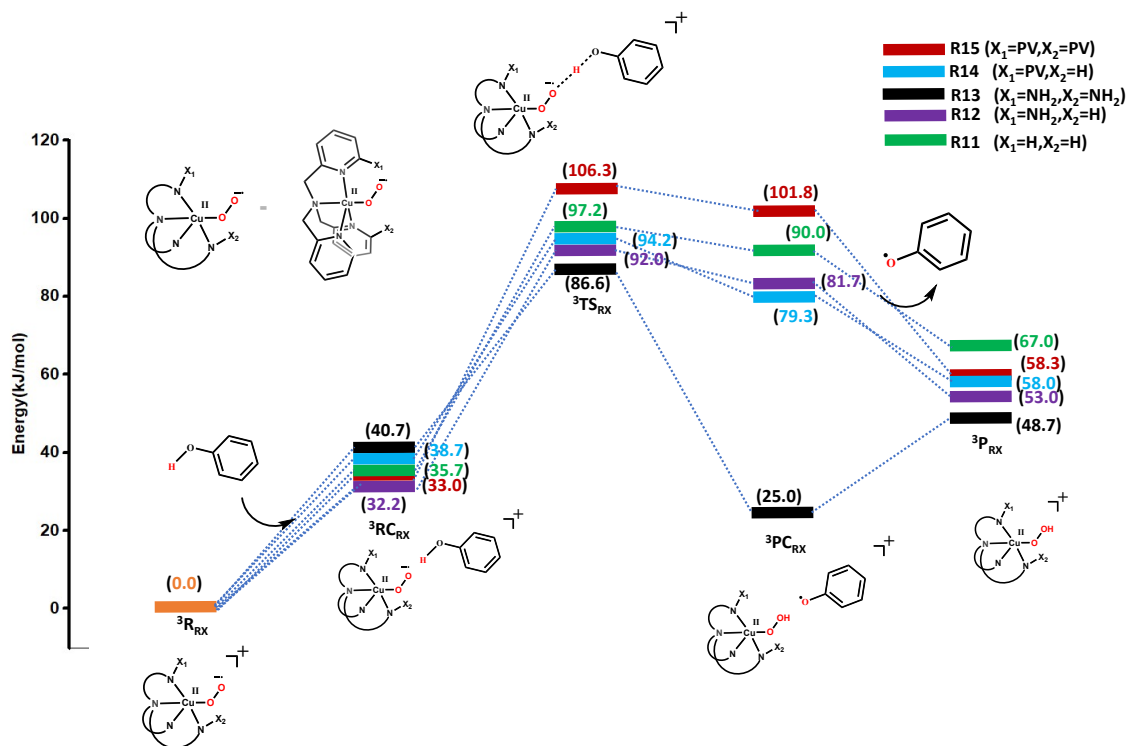

Figure S14: Energy profile for hydrogen atom abstraction (HAT) from phenol by **1a** (green; R1), **2a** (violet; R2), **3a** (black; R3), **4a** (blue; R4) and **5a** (brown; R5). (All energies are reported in kJ/mol and with reference to individual reactants shown in the orange color line)

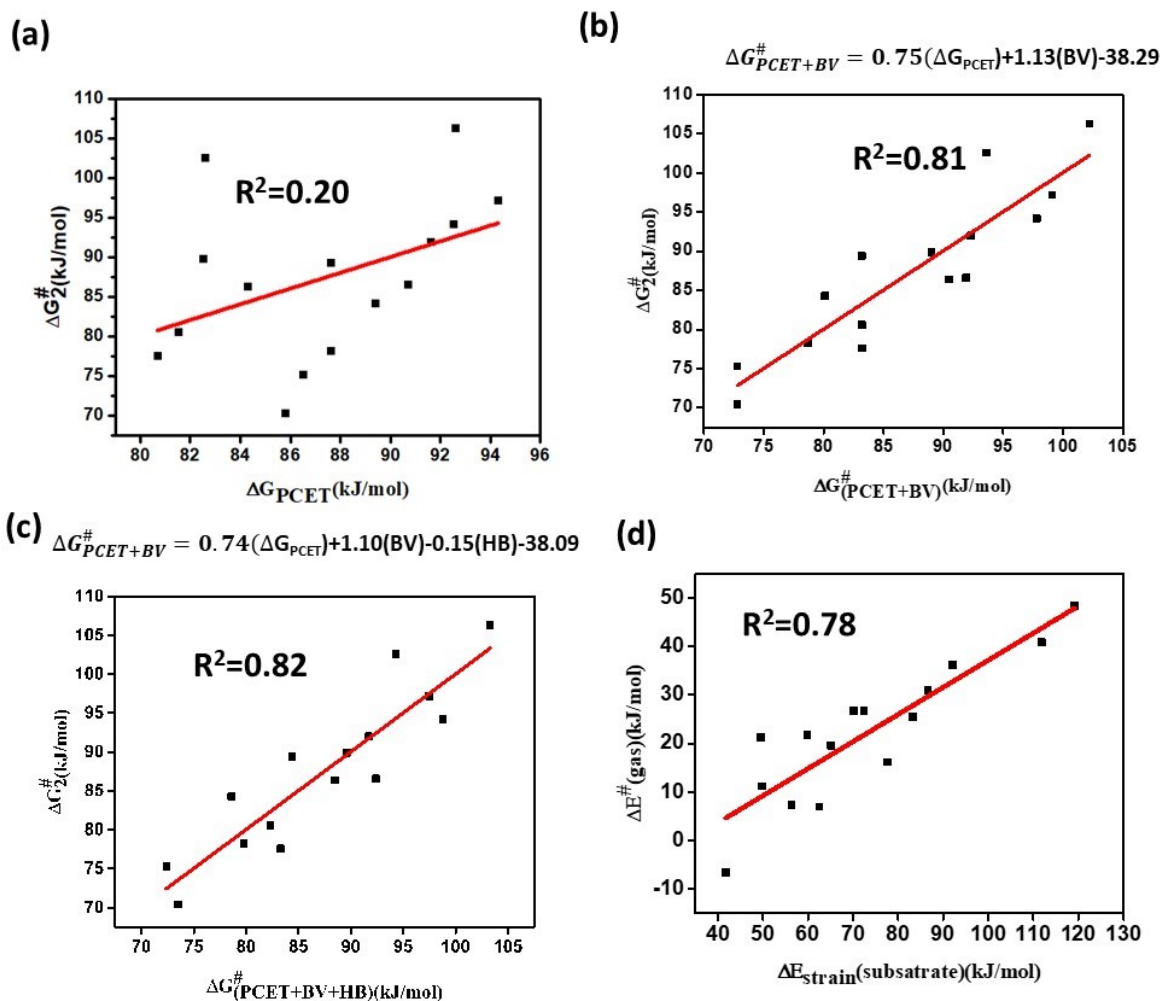

Figure S15: Plots of (a) Regression Analysis between  $\Delta G_{\text{P CET}}^{\ddagger}$  Vs  $\Delta G_{\text{P CET}}$  (b) Regression Analysis between  $\Delta G_{\text{P CET+BV}}^{\ddagger}$  vs  $\Delta G_{\text{P CET}}$  and BV (c) Regression Analysis between  $\Delta G_{\text{P CET+BV+HB}}^{\ddagger}$  vs  $\Delta G_{\text{P CET}}$  and Buried Volume (BV) and H-bonds strength (HB) (d) Regression Analysis between  $\Delta E_{\text{strain}}^{\ddagger}$  vs  $\Delta E_{\text{strain}}(\text{substrate})$

$\Delta G_{\text{P CET}}^{\ddagger}$  - free energy of reaction, BV - Buried volume, HB - H-bond strength,

### Energy decomposition analysis

To unravel the factors influencing the differences in the barrier of reactions **R1-R15** we employed the activation strain model and energy decomposition analysis (EDA). Therefore, the activation energy  $\Delta E^{\ddagger}$  of reactions can be decomposed into the strain energy  $\Delta E_{\text{strain}}$ , which corresponds to the deformation of the fragments ( $\Delta E_{\text{strain}} = \Delta E_{\text{strain}}(\text{substrate}) + \Delta E_{\text{strain}}(\text{catalyst})$ ) during the bond formation reaction. This is coupled with the mutual interaction  $\Delta E_{\text{int}}$  between the deformed fragments. The latter is subsequently broken down into steric repulsion  $\Delta E_{\text{steric}}$ , and bonding orbital interactions  $\Delta E_{\text{orb}}$ . As shown in the Figure S17(d), the strain energy associated with deforming the substrate increases, leading to an elevation in activation energy.

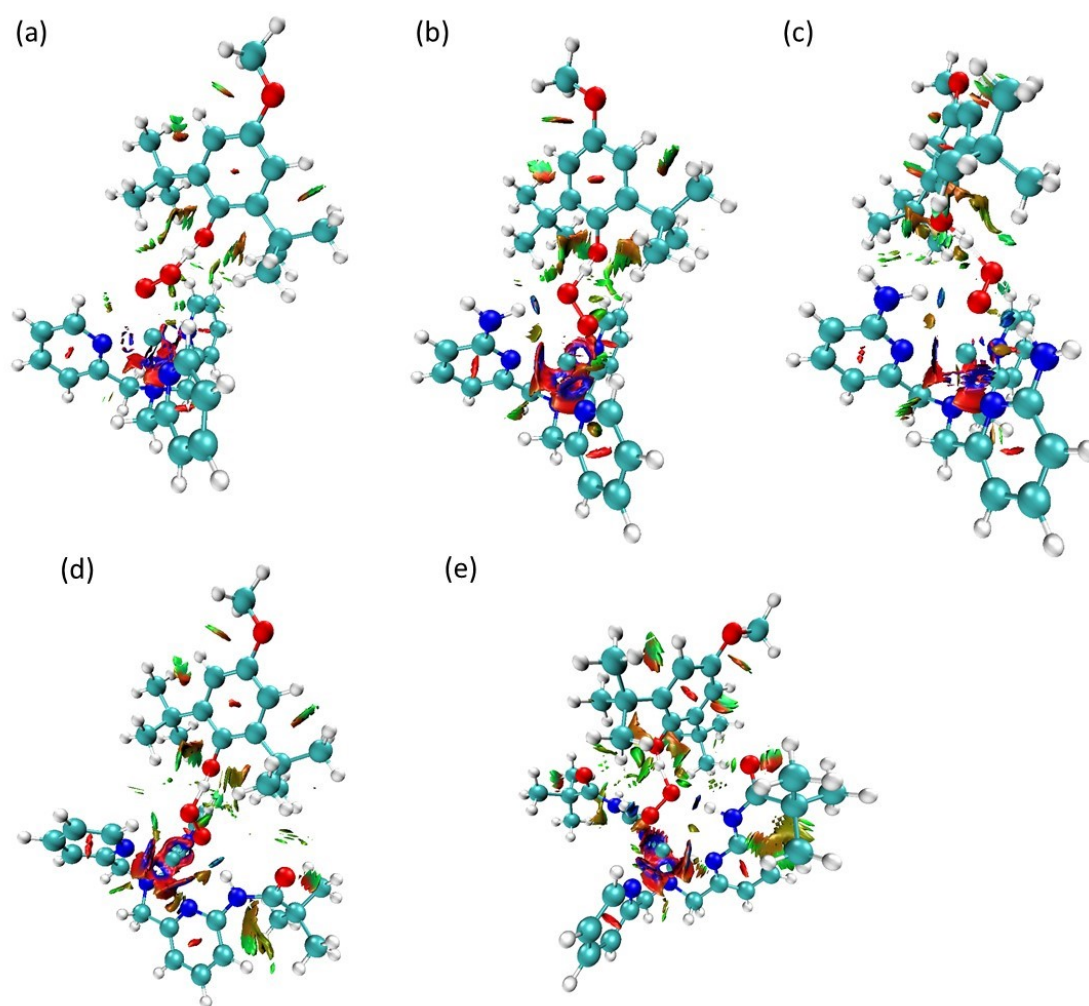

Figure S16: NCI plots of transition state structures (a)  ${}^3\text{TS}_{\text{R1}}$  (b)  ${}^3\text{TS}_{\text{R2}}$  (c)  ${}^3\text{TS}_{\text{R3}}$  (d)  ${}^3\text{TS}_{\text{R4}}$  (e)  ${}^3\text{TS}_{\text{R5}}$

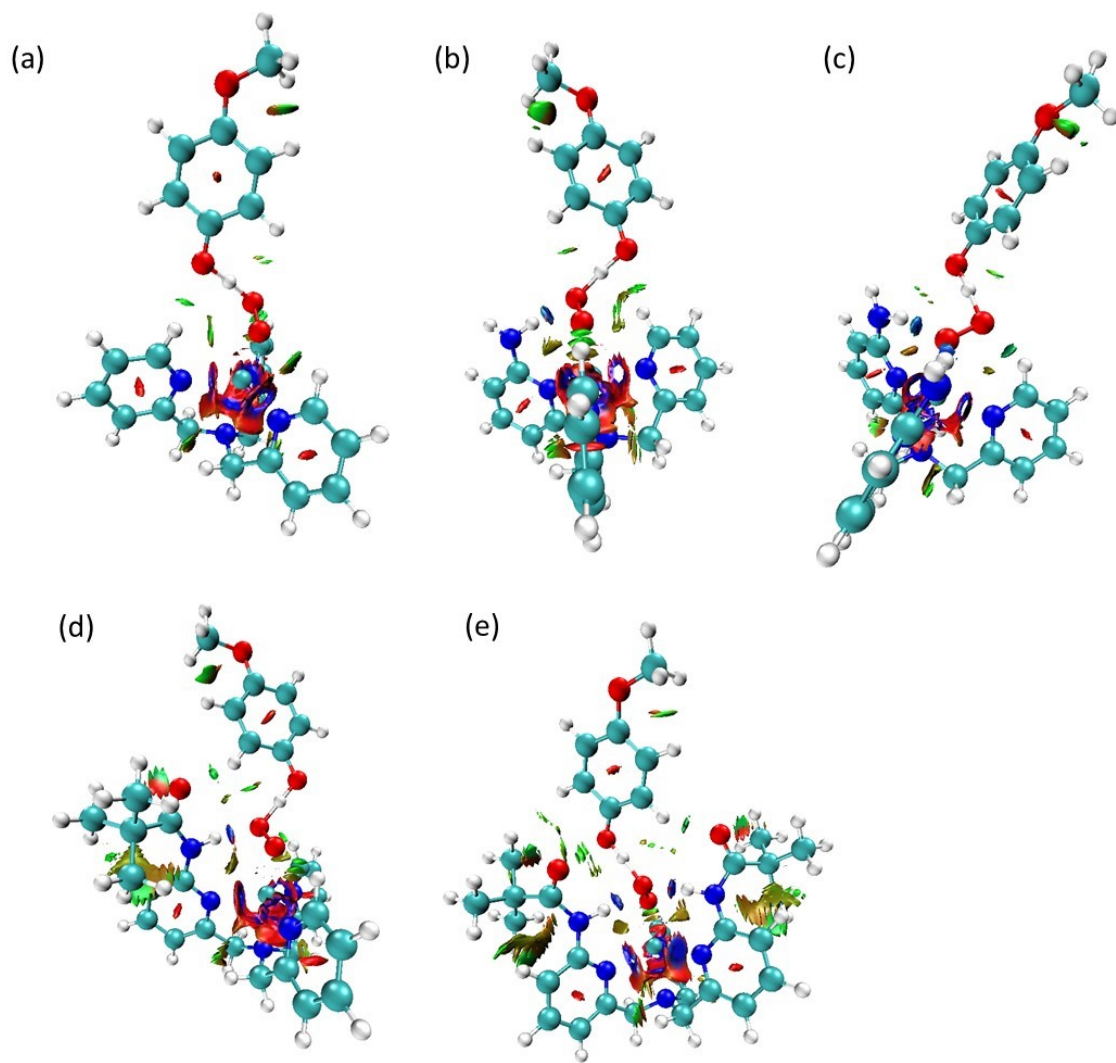

Figure S17: NCI plots of transition state structures (a)  ${}^3\text{TS}_{\text{R}6}$  (b)  ${}^3\text{TS}_{\text{R}7}$  (c)  ${}^3\text{TS}_{\text{R}8}$  (d)  ${}^3\text{TS}_{\text{R}9}$  (e)  ${}^3\text{TS}_{\text{R}10}$

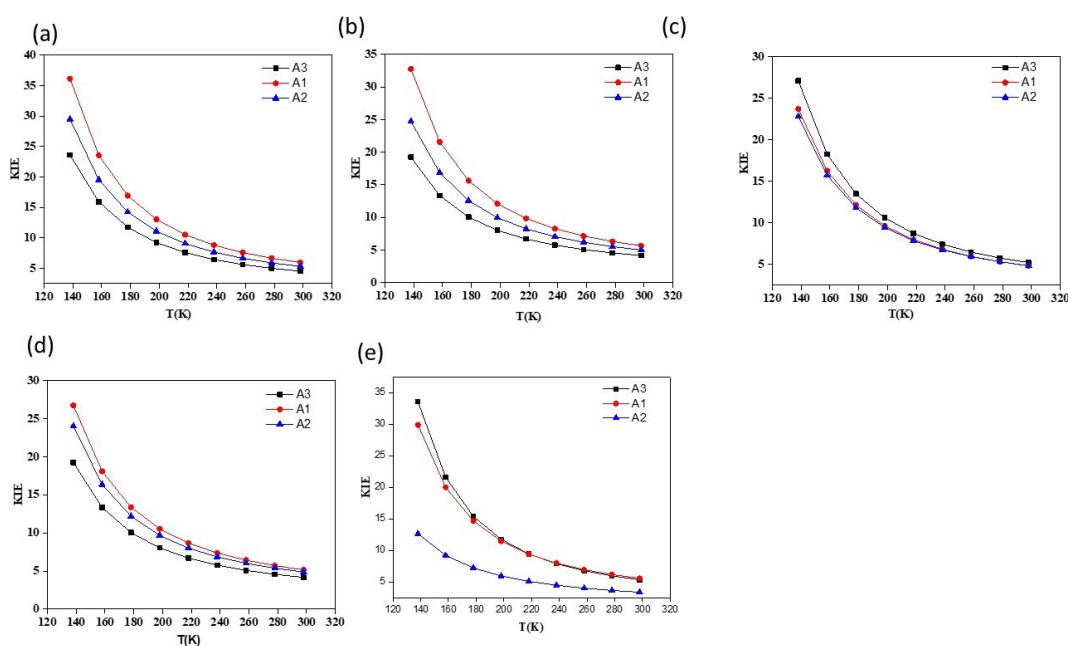

Figure S18: Temperature dependence of KIE of different catalysts with different substrates (a) **1a** (b) **2a** (c) **3a** (d) **4a** (e) **5a**

The Kinetic isotopic effects (KIE) of different reactions are calculated by using the B-M equation. The B-M equation assumes that isotope substitution has no effect on the PES, which works well for thermochemical reactions but not for photochemical activation. Translational, rotational, and vibrational motion are all treated separately in the B-M equation, and molecules are treated as rigid rotors and harmonic oscillators which neglect the vibrational anharmonicity. Another assumption is that a reaction's transition state is equivalent in all respects to the saddle point on the corresponding PES. When motion along the reaction coordinate causes a considerable change in vibrational entropy, this isn't true. The B-M equation also assumes that the reactant's internal energy is completely determined by the temperature  $T$  of the bulk solution, which is not the case when the reactant is freed by a very exothermic process. Further this equation is semiclassical i.e., it neglects the contribution from tunnelling. The B-M equation works well because the systematic mistakes caused by these approximations are effectively cancelled. <sup>20</sup>

At 138K the KIE for reactions R1 to R5 are 36.1,32.7,23.7,26.7 and 29.9 respectively. The reaction **R1** is thermoneutral ( ${}^3\text{RC}-{}^3\text{PC}$ ) and therefore it has high KIE i.e., 36.1. And also, **R4** and **R3** reactions are exothermic by 21 and 17 KJ/mol respectively. Therefore, their KIE are 26.7 and 23.7 respectively. The KIE has direct correlation with the symmetry of transition state which is measured by bond lengths difference of  $\text{O}_2\text{---H}$  and  $\text{H---O}_3$  in the transition state. The more this difference, the transition state has more asymmetry. (see bond lengths in the transition state). Surprisingly, **5a** has exception to this correlation which may attributed to the steric hindrance of two pivalimido groups. The KIE values of **R6**, **R7**, **R8**, **R9** and **R10** reactions are 29.4, 24.7, 22.8, 24.0 and 12.6 respectively. The KIE values of **R11**, **R12**, **R13**,



**R14** and **R15** reactions are 23.6, 19.2, 27.1, 19.2 and 33.5 respectively. There was no correlation between asymmetry of transition state and their KIE values for both **A2** and **A3**. In all cases, increase in the temperature causes the decrease in KIE and KIE is small at room temperature as expected. In the case of 1a, 2a and 4a, the KIE order as follows **A1** > **A2** > **A3** at all temperatures. However, for 3a and 5a, the KIE order is **A2** < **A1** < **A3**. This may be due to hydrogen bonding and steric hindrance. The difference in KIE of **A1**, **A2** and **A3** at any temperature, is large in the case of 1a, 2a and 4a and small in the case of 3a and 5a.

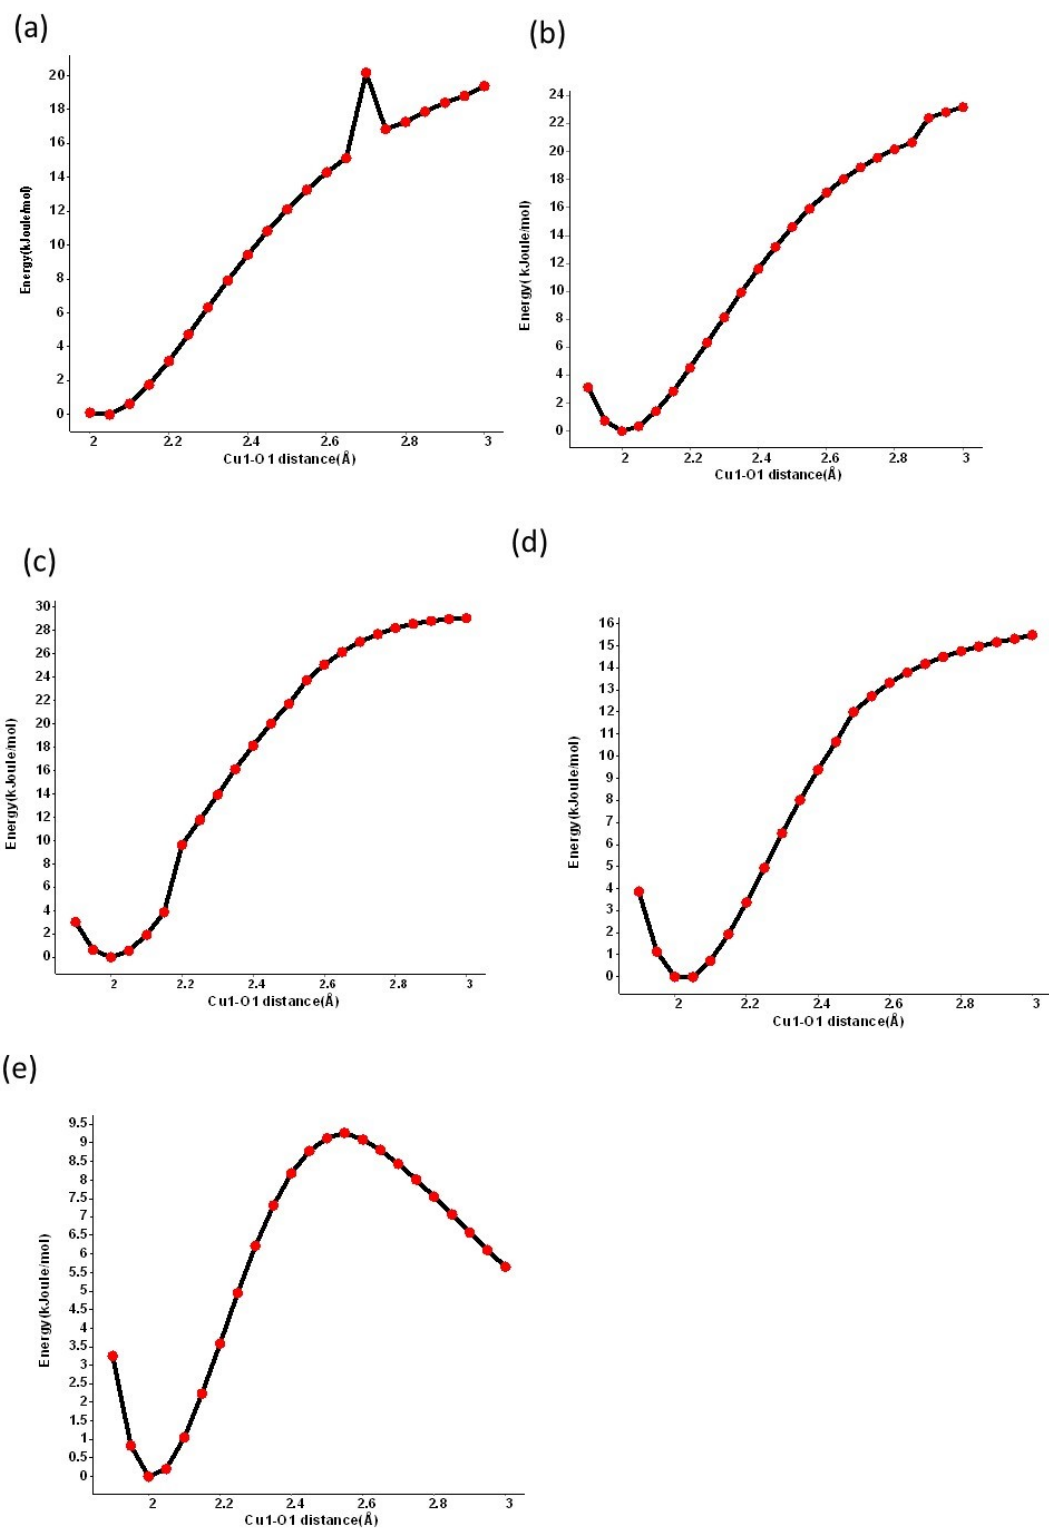

Figure S19: Relaxed scan of different catalysts by varying Cu1---O1 distance (a) **1a** (b) **2a** (c) **3a** (d) **4a** (e) **5a**.

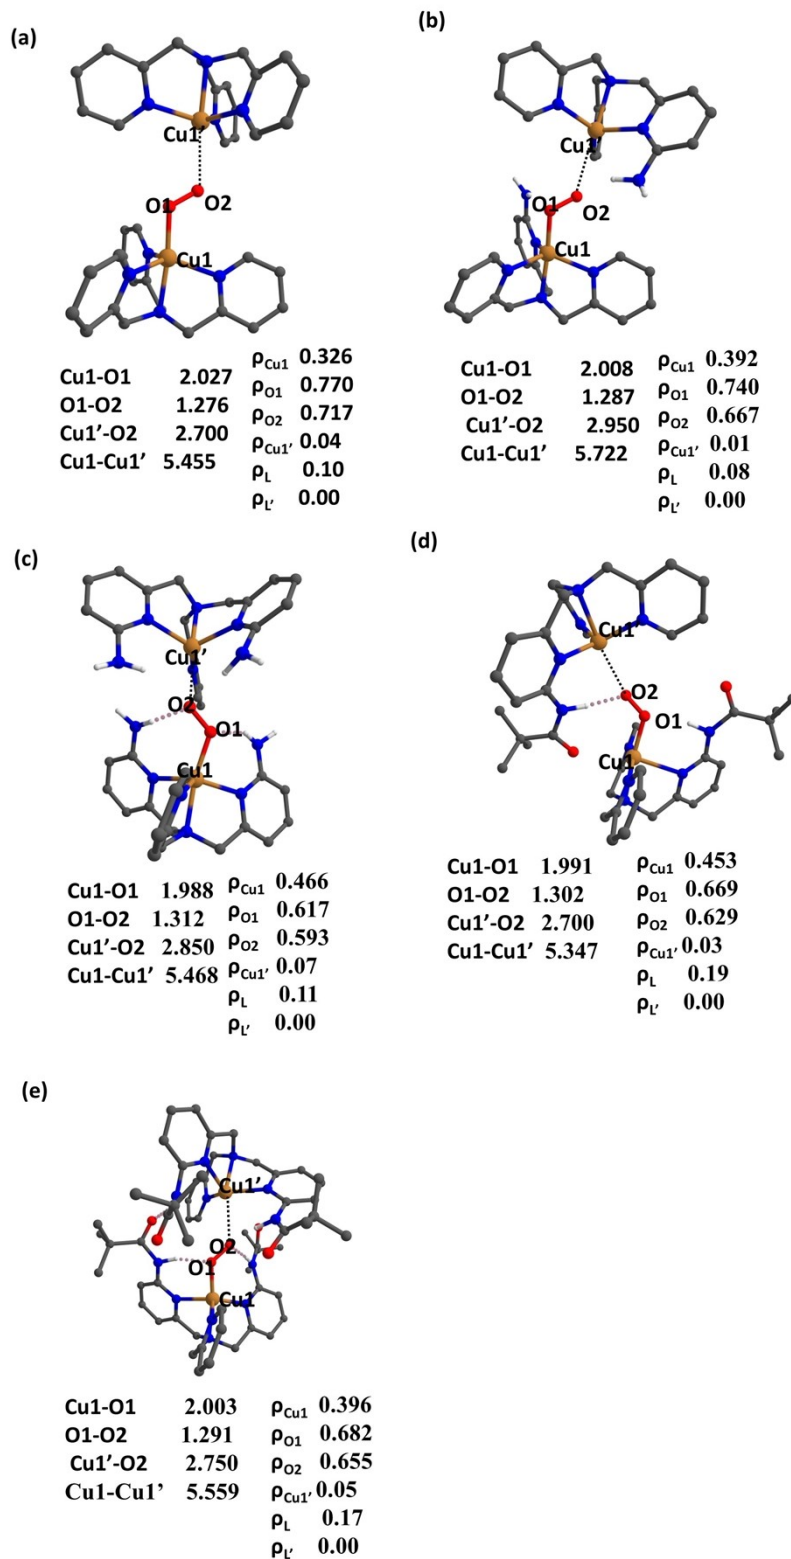

Figure S20: DFT optimized Transition state geometries of complexes (a)<sup>3</sup> (b)<sup>3</sup>  
(c) (d) (e) .

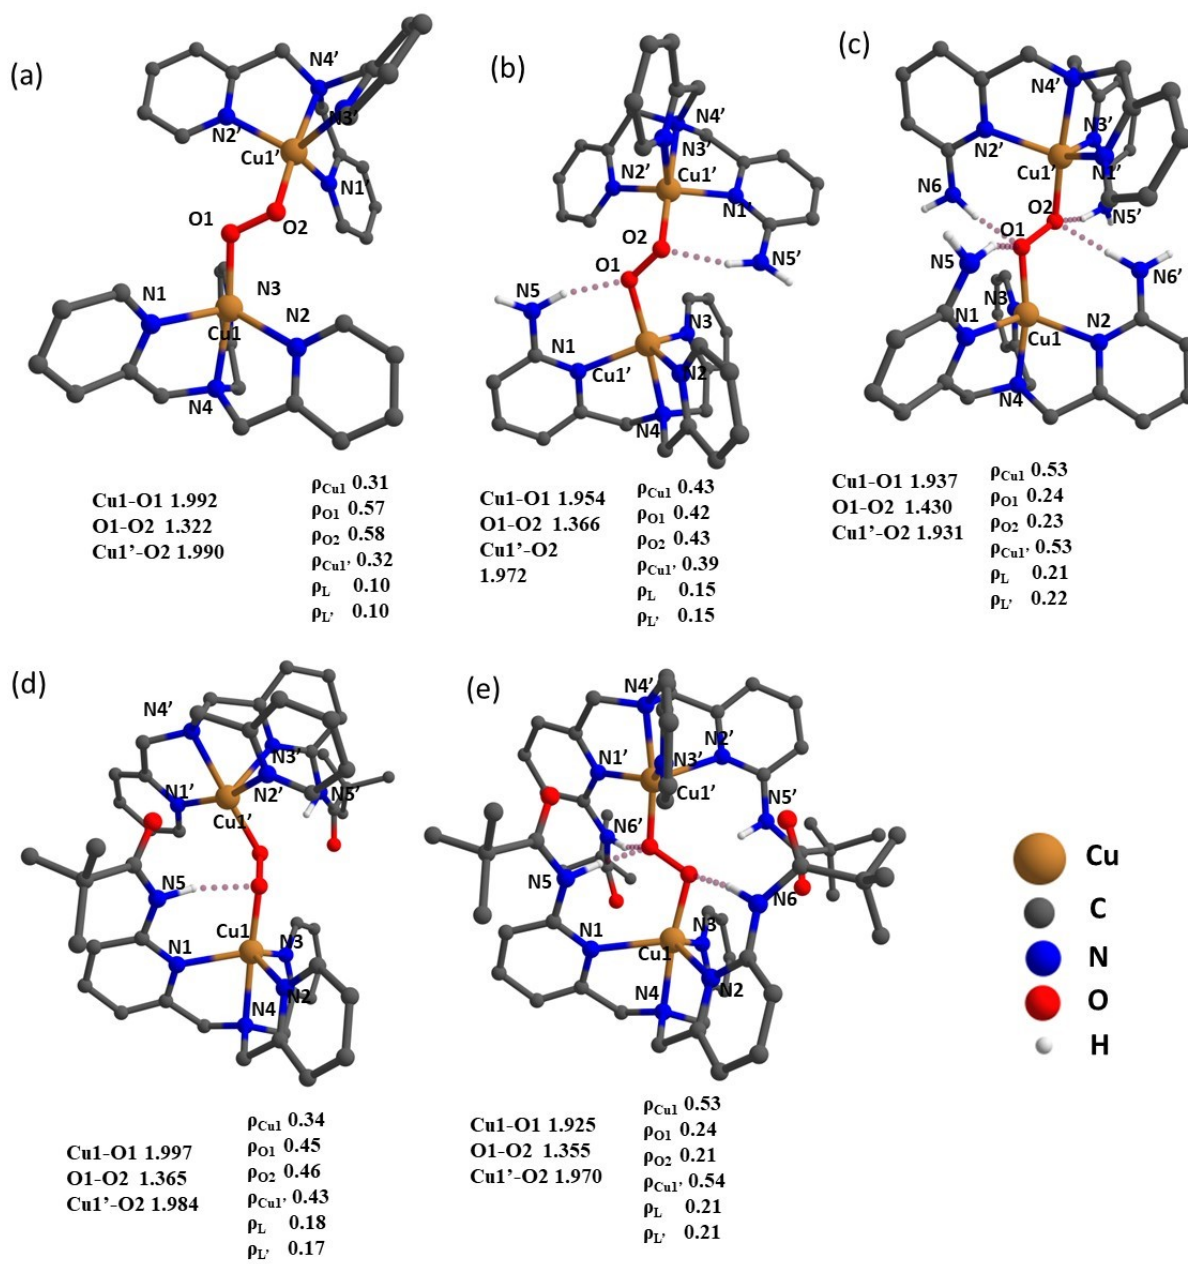

Figure S21: DFT optimized ground state geometries of complexes **1d-5d** (a) **1d** (b) **2d** (c) **3d** (d) **4d** (e) **5d**

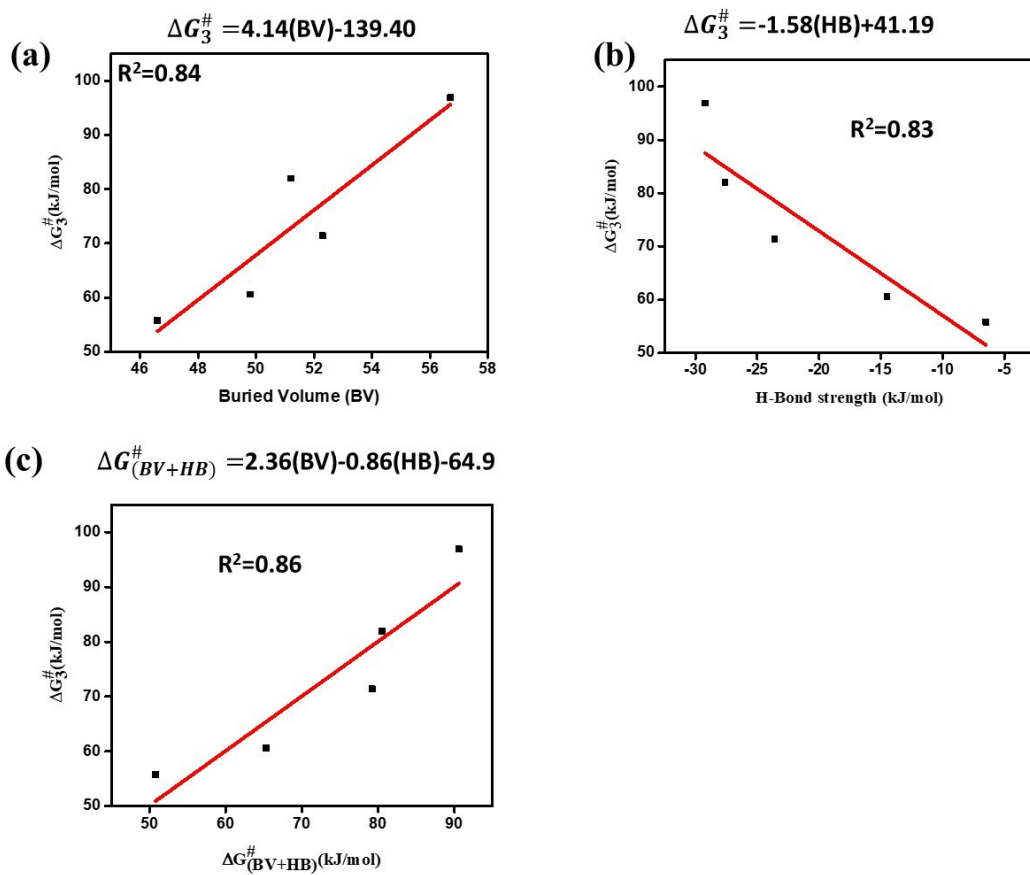

Figure S22: Plots of (a) Regression Analysis between  $\Delta G_3^\ddagger$  Vs  $\Delta G_{(BV+HB)}^\ddagger$  (b) Regression analysis between  $\Delta G_3^\ddagger$  Vs H-Bond strength (HB) (c) Regression Analysis between  $\Delta G_3^\ddagger$  Vs  $\Delta G_{(BV+HB)}^\ddagger$

## Valence Bond Diagrams for Modelling C-H Hydroxylation Mechanism

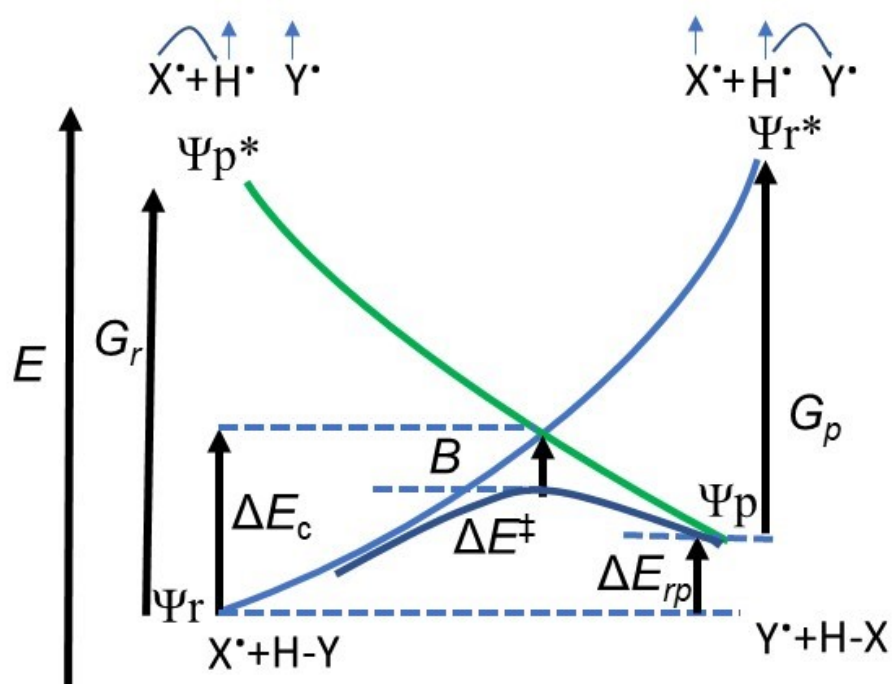

Figure S23: Valence Bond State Correlation Diagram (VBSCD) for the simple H-abstraction reaction  $X\cdot+H-Y\rightarrow XH+Y\cdot$  (where  $X\cdot = \{(X1)(X2)LCu(II) -O_2^{\cdot-}\}$ ,  $XH = \{(X1)(X2)LCu(II) -O_2^{\cdot-}\}$ ,  $H-Y$  is substrate and  $Y\cdot =$  substrate radical)

Above figure displays the VBSCD diagram for the hydrogen atom abstraction reactions by radical X from HY.

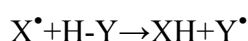

(where  $X\cdot = \{(X1)(X2)LCu(II) -O_2^{\cdot-}\}$  (**1a-5a**),  $XH = \{(X1)(X2)LCu(II) -O_2^{\cdot-}\}$  (**1b-5b**),  $H-Y$  is substrate (**A1-A3**) and  $Y\cdot =$  substrate radical (**A1'-A3'**))

The two curves have two main curves that represent the states of the reactants and product  $\Psi_r$  and  $\Psi_p$  which are represented in green and red, respectively, and two corresponding excited states,  $\Psi_r^*$  and  $\Psi_p^*$ . A unique bonding scheme is represented by each state curve: As a result, both  $\Psi_r$  and  $\Psi_p^*$  characterise the bonding pattern in the reactants, with  $\Psi_p^*$  representing the reactant-type bonding in the geometry of the products. The product-type bonding is involved in  $\Psi_p^*$ , but it occurs in the geometry of the reactants. These bonding characteristics cause the  $\Psi_r$  state to connect to  $\Psi_p^*$  and, at the same time,  $\Psi_r^*$  to connect to  $\Psi_p$  as we proceed along the reaction coordinate by shortening the O—H and R—O lengths and lengthening the O—H bond, which changes the geometry from reactants to products.  $\Psi_r$

The explicit barrier expression from the VB model is given by expression(1a)

$$\Delta E_{VB}^{\#} = f_0 G_0 + 0.5 \Delta E_{rp} + 0.5 \left( \frac{\Delta E_{rp}^2}{G_0} \right) - B \quad \rightarrow(1a)$$

This expression illustrates the relationship between the barrier and the two separate promotion gaps ( $G_r$  and  $G_p$ ), the  $f_0$  factor, which are shown in equation (1b) and the thermodynamic driving force,  $E_{rp}$ .

$$G_0 = 0.5(G_r + G_p), f_0 = 0.5(f_r + f_p) \quad \rightarrow(1b)$$

When ,  $\Delta E_{rp} \ll \ll G_0$ , the expression(1b) can be written as

$$\Delta E_{VB}^{\#} = f_0 G_0 + 0.5 \Delta E_{rp} - B \quad \rightarrow(1c)$$

It has previously been demonstrated that the promotion gap, which is proportional to the singlet-triplet promotion energy of the bonding electrons, may be represented as two times the vertical bond strength D based on semi-empirical VB equations. Equation (2) gives a good technique to approximating D. BDE is the corresponding bond dissociation energy and  $|RE_X \cdot|$  is absolute magnitude of the reorganization energy required to transform the X radical's geometry in the HX molecule from its optimal structure. The transition-state resonance energy B the from the semi-empirical VB analysis also approximated by equation (3). Both  $f_0=0.3$  and  $f_0=1/3$  will accurately forecast the trends in the barriers but 0.3 used here.

$$G_r = 2D_{H-Y} = 2[BDE_{H-Y} + |RE_Y \cdot|] \quad \rightarrow(2a)$$

$$G_p = 2D_{H-X} = 2[BDE_{H-X} + |RE_X \cdot|] \quad \rightarrow(2b)$$

$$B_{XHY} = \frac{1}{4}[BDE_{H-X} + BDE_{H-Y}] \quad \rightarrow(3)$$

Substituting the equations (2a),(2b) and (3) into the equations (1a),(1c), we may get

$$\Delta E_{VB}^{\#}(1) = 0.3G_0 + 0.5\Delta E_{rp} - B_{XHY} \quad \rightarrow(4a)$$

$$\Delta E_{VB}^{\#}(2) = 0.3G_0 + 0.5\Delta E_{rp} - B_{XHY} + 0.5 \left( \frac{\Delta E_{rp}^2}{G_0} \right) \quad \rightarrow(4b)$$

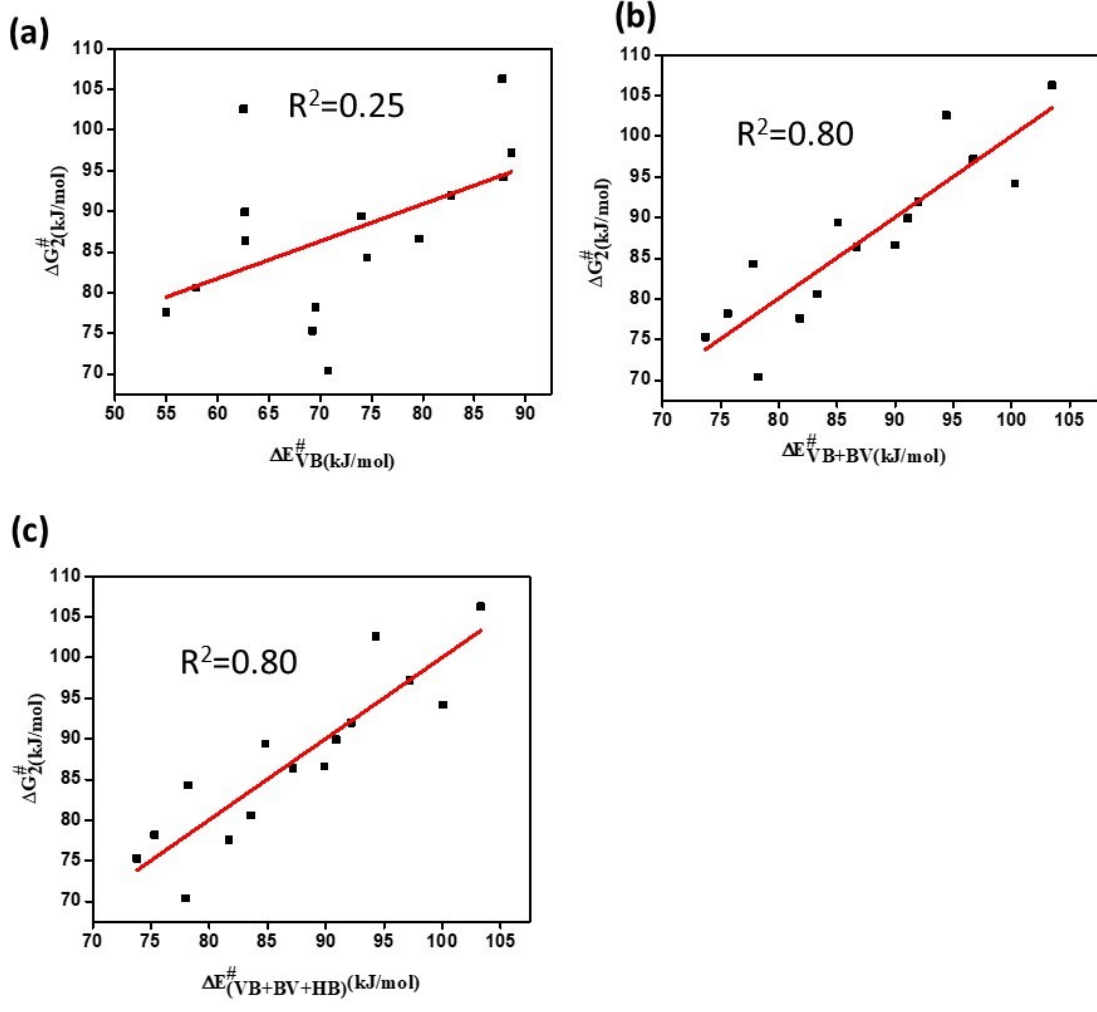

Figure S24: Plots of (a) Regression Analysis between  $\Delta G_2^\ddagger$  vs  $\Delta E_{VB}^\ddagger$  (b) Regression Analysis between  $\Delta G_2^\ddagger$  vs  $\Delta E_{VB+BV}^\ddagger$  (c) Regression Analysis between  $\Delta G_2^\ddagger$  vs  $\Delta E_{(VB+BV+HB)}^\ddagger$



## Dichotomy of Hydrogen atom transfer

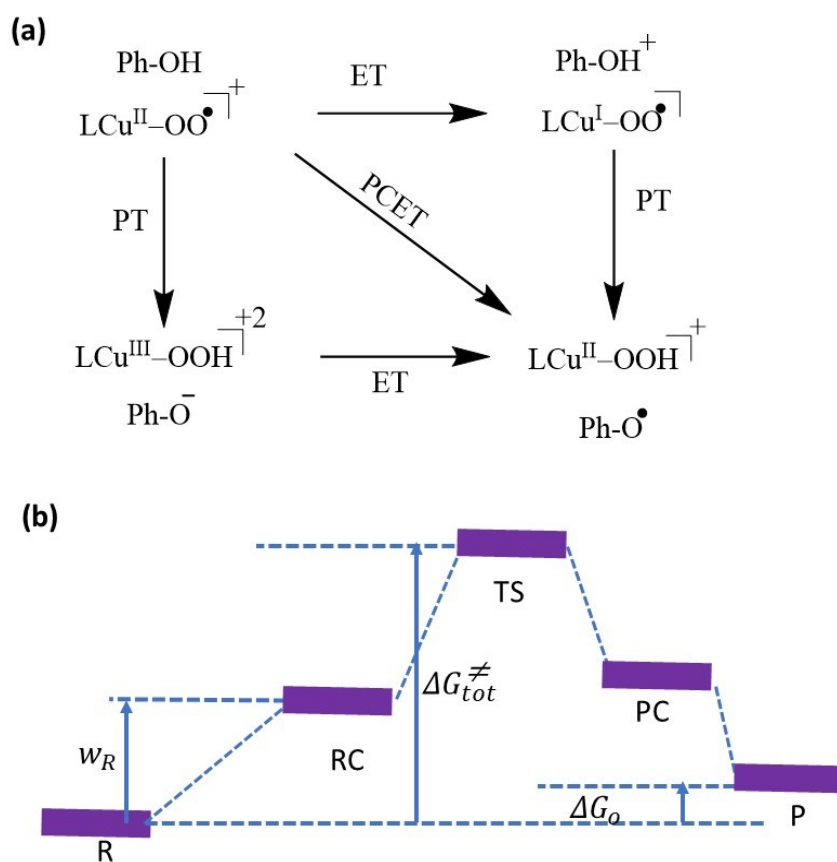

Figure S25: (a) Different Pathways for hydrogen atom abstraction from phenol by copper superoxo complex (b) HAA reaction Showing the formation of Reactant complex product complex.

For each metal superoxo-substrate combination assessed here, we tabulated the free energy of proton-coupled electron transfer ( $\Delta G_{PCET}$ , eqn(C)), free energies of proton transfer ( $\Delta G_{PT}$ , eqn(A)) and free energies of electron transfer ( $\Delta G_{ET}$ , eqn(B)), and the asynchronicity ( $\eta$ , eqn(E)) and reorganization energy ( $\lambda$ , eqn(D)) and frustration ( $\sigma$ , eqn(E)) as defined by Srnc and coworkers

$$\Delta G_{PT} = \left[ G_{(LCu^{III}-OOH)^{+2}} + G_{(Ph-O)^{-}} - G_{(Ph-OH)} - G_{(LCu^{II}-OO\cdot)^{+}} \right] \rightarrow (A)$$

$$\Delta G_{ET} = \left[ G_{(LCu^{I}-OO)} + G_{(Ph-OH)^{+}} - G_{(Ph-OH)} - G_{(LCu^{II}-OO\cdot)^{+}} \right] \rightarrow (B)$$

$$\Delta G_{PCET} = \left[ G_{(LCu^{II}-OOH)^+} + G_{(Ph-O)^-} - G_{(Ph-OH)} - G_{(LCu^{II}-OO)^+} \right] \rightarrow (C)$$

$$\frac{\lambda}{4} = \Delta G_{act}^{\ddagger} - w_R - \frac{\Delta G_o}{2} \rightarrow (D)$$

$$\eta = \frac{1}{\sqrt{2}} \left[ G_{(LCu^{III}-OOH)^{+2}} + G_{(Ph-O)^-} - G_{(LCu^I-OO)} - G_{(Ph-OH)^+} \right] \rightarrow (E)$$

$$\sigma = \Delta G_{PT} + \Delta G_{PT} \rightarrow (F)$$

Where,  $G_A$  is the free energy of species A (for example  $G_{(Ph-OH)}$  is free energy of substrate (A1-A3). Formation different species are shown in the Figure S24.  $\Delta G_{act}^{\ddagger}$  is activation obarrier of reaction and  $\Delta G_o$  is free energy of reaction.(shown in Figure S24 (b))

## Theoretical background on reduction potentials and acidity constants

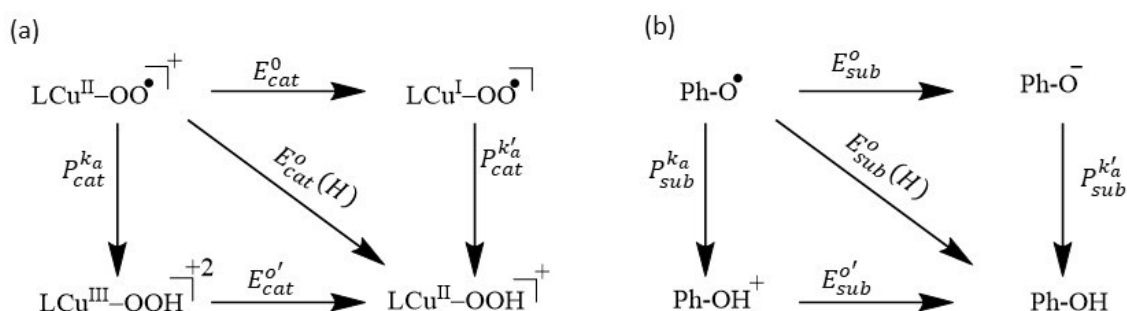

Figure S26: The thermodynamic cycles for (a) catalyst (b) substrate) connecting four structures that differ by one electron (horizontal arrows), one proton (vertical arrows), and a hydrogen atom (diagonal arrow), along with the associated thermodynamic quantities

There is a total of five thermodynamic quantities linked to this cycle. There is one electron reduction potential of these copper superoxo ( $E^o$ ) and the one-electron reduction potential of the protonated form of Cu(III)-OOH ( $E^o'$ ) and acidity constant of the copper superoxo ( $P^{ka}$ ) and the acidity constant of the reduced form of copper superoxo ( $P^{ka'}$ ). And further, both protonation and reduction processes are included in the proton-coupled reduction potential ( $E_H^o$ ), which measures a system's capacity to extract a hydrogen atom.

The acidity constant ( $P^{ka}$  and  $P^{ka'}$ ) is calculated according to the equation:

$$P^{ka} = \frac{\Delta G_{deprotonation} + G_{sol,H^+}}{RT \ln 10} \rightarrow (A1)$$

Where,  $\Delta G_{deprotonation} = G_{deprotonated} - G_{protonated}$

The effective acidity constant is defined by

$$\Delta P_{eff}^{ka} = \frac{\Delta P_a^k + \Delta P_a^{k'}}{2} \rightarrow (A2)$$

Where,

$$\Delta P_a^k = P_{cat}^{ka} - P_{sub}^{ka} \rightarrow (A3)$$

$$\Delta P_a^{k'} = P_{cat}^{ka'} - P_{sub}^{ka'} \rightarrow (A4)$$

Similarly, the one-electron reduction potential ( $E^\circ$  in V) is defined as a quantity reflecting Gibbs free energy change upon  $1e^-$   $-\Delta G_{\text{red/oxi}}/nF = -(G_{\text{red}} - G_{\text{oxi}})/nF$

proton-coupled reduction potential  $E^o(H)$  is defined by

$$E^o(H) = \Delta G_{\text{ox/red}} E_{\text{abs}}^o(\text{ref}) + G_{\text{sol,H}^+} \rightarrow (A5) \quad \text{where, } \Delta_{\text{Gox/red}} = G_{\text{ox}} - G_{\text{red}}$$

$E_{\text{abs}}^o[\text{reference}]$  is the absolute potential of a reference electrode, and  $G_{\text{sol,H}^+}$  is the free energy of solvation of a proton. The term  $G_{\text{sol,H}^+}$  incorporated into the context when the one-electron reduction of a solute is accompanied by its simultaneous protonation

Similar to acidity constants effective reduction potential were given by

$$\Delta E_{\text{eff}}^o = \frac{\Delta E^o + \Delta E^{\circ'}}{2} \rightarrow (A6)$$

Where,  $\Delta E^o = E_{\text{cat}}^o - E_{\text{sub}}^o \rightarrow (A7)$

$$\Delta E^{\circ'} = E_{\text{cat}}^{\circ'} - E_{\text{sub}}^{\circ'} \rightarrow (A8)$$

$$\Delta E^o(H) = E_{\text{cat}}^o(H) - E_{\text{sub}}^o(H) \rightarrow (A9)$$

$$\Delta G_2^\# = 0.980 (F09) - 0.1571 (F07) + 1.082 (F01) + 0.231 (F13) - 6.46$$

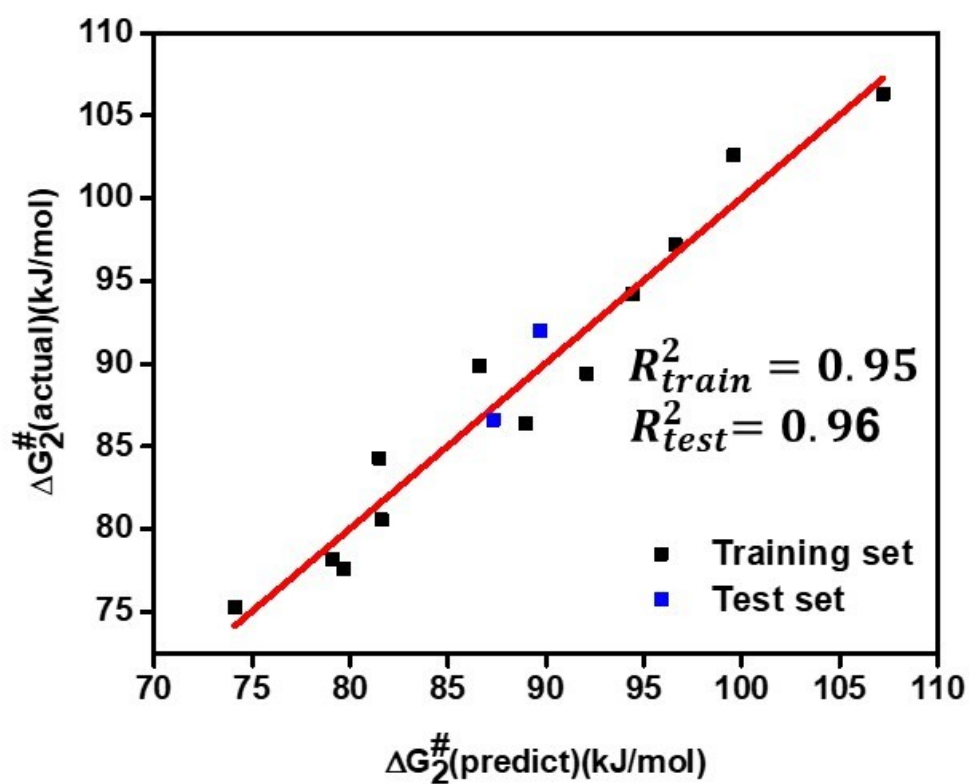

Figure S27: The Linear regression model performance for prediction of  $\Delta G_2^\#$

Table S1: Selected structural parameters of different catalysts used in this study **1a-5a**.

| Complex                | Cu-<br>O1 | Cu-<br>O2 | O1-<br>O2 | Cu-<br>N1 | Cu-<br>N2 | Cu-<br>N3 | Cu-<br>N4 | O2-<br>H(N5) | O1-<br>H(N6) |
|------------------------|-----------|-----------|-----------|-----------|-----------|-----------|-----------|--------------|--------------|
| <sup>3</sup> <b>1a</b> | 2.030     | 2.788     | 1.256     | 2.124     | 2.140     | 2.146     | 2.234     | ---          | ---          |
| <sup>1</sup> <b>1a</b> | 1.978     | 2.727     | 1.272     | 2.120     | 2.1434    | 2.148     | 2.209     | ---          | ---          |
| <sup>3</sup> <b>2a</b> | 2.010     | 2.785     | 1.266     | 2.156     | 2.187     | 2.121     | 2.200     | ---          | 2.0817       |
| <sup>1</sup> <b>2a</b> | 2.010     | 2.791     | 1.259     | 2.187     | 2.121     | 2.156     | 2.200     | ---          | 2.081        |
| <sup>3</sup> <b>3a</b> | 1.985     | 2.810     | 1.278     | 2.180     | 2.166     | 2.201     | 2.143     | 1.956        | 1.981        |
| <sup>1</sup> <b>3a</b> | 1.957     | 2.793     | 1.293     | 2.174     | 2.199     | 2.158     | 2.120     | 1.897        | 1.938        |
| <sup>3</sup> <b>4a</b> | 2.024     | 2.786     | 1.259     | 2.198     | 2.123     | 2.155     | 2.218     | 2.186        | ---          |
| <sup>1</sup> <b>4a</b> | 1.972     | 2.730     | 1.277     | 2.114     | 2.151     | 2.205     | 2.188     | 2.052        | ---          |
| <sup>3</sup> <b>5a</b> | 2.028     | 2.847     | 1.257     | 2.218     | 2.206     | 2.135     | 2.200     | 2.060        | 2.585        |
| <sup>1</sup> <b>5a</b> | 1.964     | 2.772     | 1.280     | 2.238     | 2.234     | 2.123     | 2.150     | 1.984        | 2.0988       |

Table S2: selected atoms spin densities of different catalysts used in this study **1a-5a**.

| <b>Complex</b>         | <b>Cu</b> | <b>O1</b> | <b>O2</b> | <b>O1 and O2</b> | <b>L(TMPA)</b> |
|------------------------|-----------|-----------|-----------|------------------|----------------|
| <sup>3</sup> <b>1a</b> | 0.25      | 0.785     | 0.872     | 1.65             | 0.09           |
| <sup>1</sup> <b>1a</b> | 0.339     | -0.105    | -0.338    | -0.443           | 0.06           |
| <sup>3</sup> <b>2a</b> | 0.31      | 0.770     | 0.797     | 1.56             | 0.11           |
| <sup>1</sup> <b>2a</b> | 0.17      | -0.011    | -0.014    | -0.025           | -0.007         |
| <sup>3</sup> <b>3a</b> | 0.38      | 0.686     | 0.768     | 1.45             | 0.15           |
| <sup>1</sup> <b>3a</b> | 0.456     | -0.176    | -0.464    | -0.64            | 0.10           |
| <sup>3</sup> <b>4a</b> | 0.25      | 0.785     | 0.834     | 1.71             | 0.08           |
| <sup>1</sup> <b>4a</b> | 0.366     | -0.134    | -0.346    | -0.48            | 0.06           |
| <sup>3</sup> <b>5a</b> | 0.27      | 0.775     | 0.884     | 1.61             | 0.10           |
| <sup>1</sup> <b>5a</b> | 0.389     | -0.148    | -0.379    | -0.527           | 0.09           |

Table S3: Variation of energy with change of dihedral angle catalysts used in this study **2a-5a**.

| <b>Complex</b> | <b>N1-Cu-O1-O2</b> | <b>Energy</b> |
|----------------|--------------------|---------------|
| <b>2a</b>      | 232                | 0.0           |
|                | 340                | 1.5           |
|                | 67                 | 0.5           |
|                | 226                | 0.1           |
|                | 46                 | 2.2           |
| <b>3a</b>      | 54                 | 0.0           |
|                | 340                | 2.0           |
|                | 67                 | 0.3           |
|                | 226                | 3.8           |
|                | 46                 | 0.2           |
| <b>4a</b>      | 225                | 0.0           |
|                | 340                | 2.5           |
|                | 67                 | 1.8           |
|                | 226                | 0.1           |
|                | 46                 | 9.2           |
| <b>5a</b>      | 229.79             | 0.0           |
|                | 340                | 0.7           |
|                | 67                 | 1.2           |
|                | 226                | 1.6           |
|                | 46                 | 23.8          |



Table S4: Electron density ( $\rho_{\text{BCP}}$ ), potential energy density ( $V$ ), localized orbital locator values (LOL), Wiberg bond indices (WBI) at BCP from natural bond orbital analysis, and binding energies (B.E) of important hydrogen bonds.

| Complex   | $\rho_{\text{BCP}}$<br>(a.u) | $V$<br>(a.u)                 | B.E=V/2<br>(kJ/mol) | B.E=((<br>332.34* $\rho_{\text{BCP}}$ )-<br>1.0661)*4.184<br>(kJ/mol) | LOL                | WBI                |
|-----------|------------------------------|------------------------------|---------------------|-----------------------------------------------------------------------|--------------------|--------------------|
| <b>1b</b> | 0.009                        | -0.00495                     | -6.5                | -16.66                                                                | 0.139              | 0.006              |
| <b>2b</b> | 0.017                        | -0.01105                     | -14.5               | -27.67                                                                | 0.183              | 0.017              |
| <b>3b</b> | 0.024 and<br>0.0210          | -0.01795<br>and -<br>0.01673 | -23.6 and<br>-22.0  | -37.28 and -<br>34.03                                                 | 0.218 and<br>0.193 | 0.030<br>and 0.017 |
| <b>4b</b> | 0.026                        | -0.02101                     | -27.6               | -40.66                                                                | 0.226              | 0.03               |
| <b>5b</b> | 0.026 and<br>0.027           | -0.02221                     | -28.7 and<br>-29.2  | -41.18 and -<br>41.72                                                 | 0.223 and<br>0.227 | 0.03 and<br>0.03   |

The electron density distribution is frequently used to characterize a variety of interactions within investigated systems, such as molecular aggregation, dimers, crystal structures, and hydrogen bonding.<sup>21</sup> Bader's "atoms in molecules" (AIM) theory, which is based on electron distribution calculations, is a potent technique for detecting and characterizing hydrogen bonding.<sup>22</sup> The electron density at X—O···H—Y BCP and its Laplacian well correlate with the hydrogen bond energy, according to several studies<sup>23 24 25</sup>. In 1998, Espinosa et al. showed that the binding energy (BE) of H-bond can be approximately estimated as the half value of  $V(r)$  (potential energy density) at the BCP for HBs of X—O···H—Y (X = C, N, O) namely  $BE \approx V_{\text{BCP}}/2$ . However, this relation is not valid given the fact that the BE can be predicted based on  $\rho_{\text{BCP}}$  at a much better accuracy compared to the  $V_{\text{BCP}}$ . The fitted equation for charged complexes is  $BE/\text{kcal/mol} = -332.34 \times \rho_{\text{BCP}}/\text{a. u.} - 1.0661$  with a MAPE of 10.0%.<sup>19</sup> We observed bond critical points (BCP) at H-bond interactions in **1a-5a**. The  $\rho$  value at BCP in **1a** is around 0.009 au implying that weaker hydrogen bonding interaction between hydrogen (attached to C) and  $\text{O}_2^{\bullet-}$  unit. (See Table S4) In complex **3a**, which has the two amino groups, has stronger hydrogen-bonded interactions between two amino groups hydrogens, and  $\text{O}_2^{\bullet-}$  atoms. ( $\rho$  values at O2-H(N5) and O2-H(N6) are 0.021 and 0.024 au respectively). The hydrogen bond interaction of the amino group H in **2a** is slightly lower than that of the pivalamido group H in **4a**. ( $\rho$  values at O2-H(N5) are 0.026 au and 0.017 au in **4a** and **2a** respectively) However, in complex **5a**, which has two pivalamido groups make the hydrogen bond with  $\text{O}_2^{\bullet-}$ , and this is slightly stronger than one pivalamido group ( $\rho$  values at O2-H(N6) and O2-H(N5) in **5a** are 0.026 au and 0.027 au). Binding energy values suggest that the strength of hydrogen bond interactions as follows **5a** > **4a** > **3a** > **2a** > **1a**.

Further NBO analysis was performed to get more insight into the hydrogen bond interactions. Wiberg bond index (WBI) of Cu-O and O-O also confirmed that electron transfer from copper center to dioxygen is little. The WBI of bonds O1-H3 or O2-H3 is around 0.006 implies weaker hydrogen bonding in **1a**. In complex **3a**, WBI values at O1-H2 and O2-H1 are 0.017 and 0.030 respectively. However, complex **5a**, the WBI of both hydrogen bonds are 0.03.

Further, localized orbital locator (LOL) analyses were conducted to examine the electron density localization associated with hydrogen bond interactions. Similar to ELF (electron localization function), Schmider and Becke defined another function for finding high localization zones called localized orbital locator (LOL). The LOL is given by equation (5).<sup>26</sup>

$$\text{LOL}(r) = \frac{\tau(r)}{1 + \tau(r)}$$

*where,*

$$\tau(r) = \frac{D_0(r)}{\left(\frac{1}{2}\right) \sum_i \eta_i |\nabla \varphi_i(r)|^2}$$

$D_0(r)$  is defined similar to ELF. Generally speaking, LOL and ELF are qualitatively comparable, but LOL communicates a more distinct and decisive picture than ELF.<sup>27</sup> The LOL values again support that the strength of hydrogen bond interactions as follows **5a** > **4a** > **3a** > **2a** > **1a**

Apart from AIM and NBO, we have also performed NCI analysis that is widely used to visualize hydrogen bond interactions. Noncovalent interaction analysis is a method for graphical representation of regions in real-space where non-covalent interactions occur, and it has been shown to be capable of differentiating hydrogen bonds, van der Waals interactions, and repulsive steric interactions.<sup>28</sup> The normalized and dimensionless reduced density gradient (RDG),  $s(\rho)$ , is used as a scalar function to characterize the deviations from a homogeneous electron distribution in the NCI approach. The reduced gradient function is defined by<sup>29</sup>

$$s(\rho) = \frac{|\nabla \rho|}{2\sqrt{3\pi^2\rho^4}}$$

The contributions to the Laplacian are the eigenvalues of electron density (second derivative) Hessian matrix as  $\nabla^2\rho = \lambda_1 + \lambda_2 + \lambda_3$ , where  $\lambda_1 < \lambda_2 < \lambda_3$ . the sign of second derivative helps in the identification of nature of interaction i.e., attractive, repulsive and Vander wall.<sup>30</sup> The colour codes were utilized to distinguish between different sorts of interactions in the 2D NCI and 3D NCI plots using an RGB colouring system. Strong attractive interactions, weak (van der Waals) interactions, and strong repulsive interactions were shown using blue, green, and red is surfaces.

Table S5: Buried volume (BV) of different catalysts (**1a-5a**) and substrates (**A1-A3**) used in this study.

---

| <b>Catalyst/Substrate</b> | <b>%V<sub>buried</sub></b> |
|---------------------------|----------------------------|
| <b>1a</b>                 | 46.6                       |
| <b>2a</b>                 | 49.8                       |
| <b>3a</b>                 | 52.3                       |
| <b>4a</b>                 | 51.2                       |
| <b>5a</b>                 | 56.7                       |
| <b>A1</b>                 | 56.6                       |
| <b>A2</b>                 | 30.4                       |
| <b>A3</b>                 | 30.5                       |

---

Table S6: Selected structural parameters of reactant complex of reactions **R1-R15**.

| Complex                        | Cu-<br>O1 | Cu-<br>O2 | O1-<br>O2 | Cu-<br>N1 | Cu-<br>N2 | Cu-<br>N3 | Cu-<br>N4 | O2-<br>H(sub) | O3-<br>H(sub) |
|--------------------------------|-----------|-----------|-----------|-----------|-----------|-----------|-----------|---------------|---------------|
| <sup>3</sup> RC <sub>R1</sub>  | 2.038     | 2.831     | 1.254     | 2.131     | 2.139     | 2.138     | 2.241     | 4.135         | 0.965         |
| <sup>3</sup> RC <sub>R2</sub>  | 2.023     | 2.841     | 1.266     | 2.163     | 2.150     | 2.148     | 2.196     | 5.774         | 0.968         |
| <sup>3</sup> RC <sub>R3</sub>  | 1.986     | 2.814     | 1.277     | 2.185     | 2.171     | 2.190     | 2.147     | 5.592         | 0.968         |
| <sup>3</sup> RC <sub>R4</sub>  | 2.029     | 2.797     | 1.258     | 2.190     | 2.125     | 2.155     | 2.221     | 4.861         | 0.965         |
| <sup>3</sup> RC <sub>R5</sub>  | ---       | ---       | ---       | ---       | ---       | ---       | ---       | ---           | ---           |
| <sup>3</sup> RC <sub>R6</sub>  | 1.999     | 2.765     | 1.267     | 2.138     | 2.124     | 2.139     | 2.211     | 2.147         | 0.972         |
| <sup>3</sup> RC <sub>R7</sub>  | 1.989     | 2.783     | 1.278     | 2.160     | 2.189     | 2.126     | 2.184     | 2.183         | 0.972         |
| <sup>3</sup> RC <sub>R8</sub>  | 1.982     | 2.793     | 1.279     | 2.189     | 2.169     | 2.189     | 2.143     | 2.625         | 0.970         |
| <sup>3</sup> RC <sub>R9</sub>  | 1.996     | 2.731     | 1.275     | 2.227     | 2.117     | 2.165     | 2.183     | 2.766         | 0.971         |
| <sup>3</sup> RC <sub>R10</sub> | 2.115     | 2.995     | 1.240     | 2.173     | 2.211     | 2.177     | 2.265     | 3.021         | 0.989         |
| <sup>3</sup> RC <sub>R11</sub> | 1.999     | 2.767     | 2.138     | 2.138     | 2.124     | 2.138     | 2.209     | 2.140         | 0.972         |
| <sup>3</sup> RC <sub>R12</sub> | 1.995     | 2.825     | 1.276     | 2.147     | 2.191     | 2.126     | 2.174     | 2.093         | 0.973         |
| <sup>3</sup> RC <sub>R13</sub> | 1.982     | 2.795     | 1.279     | 2.191     | 2.185     | 2.169     | 2.141     | 2.632         | 0.970         |
| <sup>3</sup> RC <sub>R14</sub> | 1.998     | 2.724     | 1.274     | 2.166     | 2.116     | 2.231     | 2.185     | 2.791         | 0.971         |
| <sup>3</sup> RC <sub>R15</sub> | ---       | ---       | ---       | ---       | ---       | ---       | ---       | ---           | ---           |

Table S7: Selected structural parameters of transition states of all reactions **R1-R15**.

| Complex                        | Cu-<br>O1 | Cu-<br>O2 | O1-<br>O2 | Cu-<br>N1 | Cu-<br>N2 | Cu-<br>N3 | Cu-<br>N4 | O2-<br>H(N6) | O1-<br>H(N6) | O2-<br>H(sub) | H(sub)-<br>O3 |
|--------------------------------|-----------|-----------|-----------|-----------|-----------|-----------|-----------|--------------|--------------|---------------|---------------|
| <sup>3</sup> TS <sub>R1</sub>  | 1.961     | 2.779     | 1.331     | 2.145     | 2.144     | 2.156     | 2.265     | --           | --           | 1.280         | 1.131         |
| <sup>3</sup> TS <sub>R2</sub>  | 1.958     | 2.882     | 1.339     | 2.157     | 2.212     | 2.145     | 2.228     | 1.854        | --           | 1.300         | 1.116         |
| <sup>3</sup> TS <sub>R3</sub>  | 1.973     | 2.841     | 1.348     | 2.169     | 2.170     | 2.213     | 2.179     | 1.945        | 1.928        | 1.368         | 1.079         |
| <sup>3</sup> TS <sub>R4</sub>  | 1.964     | 2.839     | 1.334     | 2.243     | 2.140     | 2.149     | 2.231     | 1.932        | --           | 1.343         | 1.09          |
| <sup>3</sup> TS <sub>R5</sub>  | 1.970     | 2.741     | 1.341     | 2.361     | 2.157     | 2.231     | 2.210     | 1.903        | 1.776        | 1.413         | 1.068         |
| <sup>3</sup> TS <sub>R6</sub>  | 1.954     | 2.749     | 1.345     | 2.159     | 2.140     | 2.155     | 2.264     | --           | --           | 1.233         | 1.162         |
| <sup>3</sup> TS <sub>R7</sub>  | 1.938     | 2.740     | 1.358     | 2.219     | 2.142     | 2.158     | 2.142     | 1.891        | --           | 1.245         | 1.152         |
| <sup>3</sup> TS <sub>R8</sub>  | 1.966     | 2.812     | 1.362     | 2.174     | 2.179     | 2.195     | 2.177     | 1.920        | 1.917        | 1.303         | 1.113         |
| <sup>3</sup> TS <sub>R9</sub>  | 1.940     | 2.661     | 1.362     | 2.265     | 2.141     | 2.140     | 2.249     | 1.821        | --           | 1.299         | 1.119         |
| <sup>3</sup> TS <sub>R10</sub> | 1.914     | 2.691     | 1.376     | 2.307     | 2.140     | 2.239     | 2.201     | 1.780        | 1.843        | 1.402         | 1.070         |
| <sup>3</sup> TS <sub>R11</sub> | 1.937     | 2.730     | 1.350     | 2.154     | 2.130     | 2.161     | 2.261     | --           | --           | 1.160         | 1.231         |
| <sup>3</sup> TS <sub>R12</sub> | 1.933     | 2.741     | 1.360     | 2.149     | 2.221     | 2.134     | 2.194     | 1.903        | --           | 1.171         | 1.218         |
| <sup>3</sup> TS <sub>R13</sub> | 1.955     | 2.799     | 1.366     | 2.191     | 2.170     | 2.172     | 2.149     | 1.937        | 1.922        | 1.212         | 1.177         |
| <sup>3</sup> TS <sub>R14</sub> | 1.927     | 2.675     | 1.364     | 2.135     | 2.266     | 2.132     | 2.209     | 1.843        | --           | 1.208         | 1.184         |
| <sup>3</sup> TS <sub>R15</sub> | 1.919     | 2.714     | 1.378     | 2.226     | 2.309     | 2.140     | 2.177     | 1.818        | 1.865        | 1.273         | 1.139         |

Table S8: Selected atom spin densities of transition states of all reactions **R1-R15**.

| <b>Complex</b>               | <b>Cu</b> | <b>O1</b> | <b>O2</b> | <b>H( sub)</b> | <b>O3</b> | <b>Sub</b> |
|------------------------------|-----------|-----------|-----------|----------------|-----------|------------|
| ${}^3\text{TS}_{\text{R1}}$  | 0.294     | 0.567     | 0.470     | -0.032         | 0.167     | 0.58       |
| ${}^3\text{TS}_{\text{R2}}$  | 0.33      | 0.549     | 0.422     | -0.029         | 0.154     | 0.58       |
| ${}^3\text{TS}_{\text{R3}}$  | 0.38      | 0.463     | 0.462     | -0.027         | 0.143     | 0.57       |
| ${}^3\text{TS}_{\text{R4}}$  | 0.29      | 0.522     | 0.481     | -0.027         | 0.140     | 0.61       |
| ${}^3\text{TS}_{\text{R5}}$  | 0.26      | 0.503     | 0.459     | -0.17          | 0.133     | 0.70       |
| ${}^3\text{TS}_{\text{R6}}$  | 0.310     | 0.550     | 0.398     | -0.021         | 0.212     | 0.65       |
| ${}^3\text{TS}_{\text{R7}}$  | 0.362     | 0.521     | 0.335     | -0.016         | 0.208     | 0.67       |
| ${}^3\text{TS}_{\text{R8}}$  | 0.401     | 0.434     | 0.388     | -0.018         | 0.191     | 0.63       |
| ${}^3\text{TS}_{\text{R9}}$  | 0.30      | 0.516     | 0.324     | -0.012         | 0.214     | 0.77       |
| ${}^3\text{TS}_{\text{R10}}$ | 0.35      | 0.482     | 0.273     | -0.011         | 0.204     | 0.79       |
| ${}^3\text{TS}_{\text{R11}}$ | 0.366     | 0.542     | 0.363     | -0.021         | 0.252     | 0.62       |
| ${}^3\text{TS}_{\text{R12}}$ | 0.407     | 0.515     | 0.314     | -0.017         | 0.248     | 0.59       |
| ${}^3\text{TS}_{\text{R13}}$ | 0.44      | 0.425     | 0.359     | -0.020         | .234      | 0.59       |
| ${}^3\text{TS}_{\text{R14}}$ | 0.36      | 0.512     | 0.303     | -0.14          | 0.256     | 0.70       |
| ${}^3\text{TS}_{\text{R15}}$ | 0.39      | 0.478     | 0.252     | -0.12          | 0.255     | 0.75       |

Table S9: Selected structural parameters of product complexes of all reactions **R1-R15**.

| Complex                        | Cu-<br>O1 | Cu-<br>O2 | O1-<br>O2 | Cu-<br>N1 | Cu-<br>N2 | Cu-<br>N3 | Cu-<br>N4 | O2-<br>H(N6) | O1-<br>H(N6) | O2-<br>H(sub) | H-<br>O3 |
|--------------------------------|-----------|-----------|-----------|-----------|-----------|-----------|-----------|--------------|--------------|---------------|----------|
| <sup>3</sup> PC <sub>R1</sub>  | 1.913     | 2.759     | 1.405     | 2.140     | 2.167     | 2.140     | 2.247     | ---          | ---          | 0.989         | 1.741    |
| <sup>3</sup> PC <sub>R2</sub>  | ---       | ---       | ---       | ---       | ---       | ---       | ---       | ---          | ---          | ---           | ---      |
| <sup>3</sup> PC <sub>R3</sub>  | 1.913     | 2.834     | 1.449     | 2.182     | 2.167     | 2.165     | 2.126     | 1.891        | 1.845        | 0.97          | 4.949    |
| <sup>3</sup> PC <sub>R4</sub>  | 1.888     | 2.660     | 1.424     | 2.120     | 2.276     | 2.130     | 2.187     | 1.859        | ---          | 0.992         | 1.711    |
| <sup>3</sup> PC <sub>R5</sub>  | ---       | ---       | ---       | ---       | ---       | ---       | ---       | ---          | ---          | ---           | ---      |
| <sup>3</sup> PC <sub>R6</sub>  | 1.907     | 2.726     | 1.406     | 2.158     | 2.173     | 2.134     | 2.244     | ---          | ---          | 0.998         | 1.719    |
| <sup>3</sup> PC <sub>R7</sub>  | 1.913     | 2.810     | 1.413     | 2.229     | 2.144     | 2.158     | 2.214     | 1.818        | ---          | 0.998         | 1.699    |
| <sup>3</sup> PC <sub>R8</sub>  | ---       | ---       | ---       | ---       | ---       | ---       | ---       | ---          | ---          | ---           | ---      |
| <sup>3</sup> PC <sub>R9</sub>  | 1.900     | 2.790     | 1.408     | 2.135     | 2.154     | 2.242     | 2.187     | 1.791        | ---          | 1.003         | 1.687    |
| <sup>3</sup> PC <sub>R10</sub> | 1.938     | 2.893     | 1.384     | 2.256     | 2.174     | 2.245     | 2.264     | 2.705        | 2.613        | 0.996         | 3.181    |
| <sup>3</sup> PC <sub>R11</sub> | 1.907     | 2.729     | 1.409     | 2.177     | 2.153     | 2.130     | 2.238     | ---          | ---          | 0.993         | 1.755    |
| <sup>3</sup> PC <sub>R12</sub> | 1.913     | 2.818     | 1.416     | 2.1560    | 2.229     | 2.142     | 2.2081    | 1.823        | ---          | 0.994         | 1.738    |
| <sup>3</sup> PC <sub>R13</sub> | ---       | ---       | ---       | ---       | ---       | ---       | ---       | ---          | ---          | ---           | ---      |
| <sup>3</sup> PC <sub>R14</sub> | 1.903     | 2.807     | 1.411     | 2.243     | 2.130     | 2.144     | 2.182     | ---          | 1.783        | 0.998         | 1.718    |
| <sup>3</sup> PC <sub>R15</sub> | 1.935     | 2.884     | 1.385     | 2.249     | 2.259     | 2.249     | 2.258     | 2.581        | 2.68         | 0.996         | 3.147    |

Table S10: Selected atom spin densities of product complexes of all reactions **R1-R15**.

| Complex                        | Cu    | O1    | O2    | O3    | C(ben) |
|--------------------------------|-------|-------|-------|-------|--------|
| <sup>3</sup> PC <sub>R1</sub>  | 0.400 | 0.375 | 0.119 | 0.296 | 0.655  |
| <sup>3</sup> PC <sub>R2</sub>  | ---   | ---   | ---   | ---   | ---    |
| <sup>3</sup> PC <sub>R3</sub>  | 0.537 | 0.230 | 0.023 | 0.308 | 0.589  |
| <sup>3</sup> PC <sub>R4</sub>  | 0.446 | 0.346 | 0.080 | 0.301 | 0.596  |
| <sup>3</sup> PC <sub>R5</sub>  | ---   | ---   | ---   | ---   | ---    |
| <sup>3</sup> PC <sub>R6</sub>  | 0.38  | 0.38  | 0.128 | 0.335 | 0.63   |
| <sup>3</sup> PC <sub>R7</sub>  | 0.423 | 0.355 | 0.098 | 0.330 | 0.56   |
| <sup>3</sup> PC <sub>R8</sub>  | ---   | ---   | ---   | ---   | ---    |
| <sup>3</sup> PC <sub>R9</sub>  | 0.424 | 0.327 | 0.125 | 0.328 | 0.69   |
| <sup>3</sup> PC <sub>R10</sub> | 0.33  | 0.411 | 0.180 |       |        |
| <sup>3</sup> PC <sub>R11</sub> | 0.40  | 0.375 | 0.20  | 0.38  | 0.693  |
| <sup>3</sup> PC <sub>R12</sub> | 0.443 | 0.347 | 0.09  | 0.379 | 0.69   |
| <sup>3</sup> PC <sub>R13</sub> | ---   | ---   | ---   | ---   | ---    |
| <sup>3</sup> PC <sub>R14</sub> | 0.43  | 0.324 | 0.116 | 0.380 | 0.68   |
| <sup>3</sup> PC <sub>R15</sub> | ---   | ---   | ---   | ---   | ---    |



Table S11: Selected structural parameters of **1b-5b**.

| Complex                | Cu-O1 | Cu-O2 | O1-O2  | Cu-N1 | Cu-N2  | Cu-N3  | Cu-N4 | O2-H(N1/N2) | O1-H(N1/N2) | O2-H(N1/N2) |
|------------------------|-------|-------|--------|-------|--------|--------|-------|-------------|-------------|-------------|
| <sup>3</sup> <b>1b</b> | 1.907 | 2.779 | 1.419  | 2.154 | 2.156  | 2.124  | 2.213 | ---         | ---         | ---         |
| <sup>1</sup> <b>1a</b> | 1.978 | 2.727 | 1.272  | 2.143 | 2.148  | 2.120  | 2.209 | ---         | ---         | ---         |
| <sup>3</sup> <b>2b</b> | 1.912 | 2.702 | 1.425  | 2.168 | 2.162  | 2.121  | 2.170 | 1.875       | ---         | 2.597       |
| <sup>1</sup> <b>2b</b> | 2.010 | 2.791 | 1.2592 | 2.146 | 2.128  | 2.181  | 2.219 | 2.120       | ---         | ---         |
| <sup>3</sup> <b>3b</b> | 1.921 | 2.866 | 1.435  | 2.159 | 2.254  | 2.153  | 2.134 | 1.824       | 1.844       | ---         |
| <sup>1</sup> <b>3b</b> | 1.957 | 2.793 | 1.293  | 2.128 | 2.1812 | 2.146  | 2.219 | 1.897       | 1.938       | ---         |
| <sup>3</sup> <b>4b</b> | 1.906 | 2.779 | 1.419  | 2.160 | 2.114  | 2.242  | 2.210 | 2.038       | ---         | ---         |
| <sup>1</sup> <b>4b</b> | 1.972 | 2.730 | .277   | 2.151 | 2.205  | 2.114  | 2.188 | 2.052       | ---         | ---         |
| <sup>3</sup> <b>5b</b> | 1.917 | 2.874 | 1.396  | 2.265 | 2.189  | 2.1447 | 2.222 | 1.857       | ---         | 2.258       |
| <sup>1</sup> <b>5b</b> | 1.964 | 2.772 | 1.280  | 2.234 | 2.238  | 2.1237 | 2.150 | 1.984       | ---         | 2.0988      |

Table S12: Selected atom spin densities of different catalysts used in this study **1b-5b**.

| <b>Complex</b>        | <b>Cu</b> | <b>O1</b> | <b>O2</b> | <b>Ligand</b> |
|-----------------------|-----------|-----------|-----------|---------------|
| <b><sup>3</sup>1b</b> | 0.435     | 0.347     | 0.087     | 0.135         |
| <b><sup>1</sup>1b</b> | 0.339     | -0.105    | -0.338    | 0.062         |
| <b><sup>3</sup>2b</b> | 0.466     | 0.304     | 0.082     | 0.153         |
| <b><sup>1</sup>2b</b> | 0.444     | -0.172    | -0.380    | 0.153         |
| <b><sup>3</sup>3b</b> | 0.510     | 0.246     | 0.046     | 0.194         |
| <b><sup>1</sup>3b</b> | 0.456     | -0.176    | -0.434    | 0.178         |
| <b><sup>3</sup>4b</b> | 0.427     | 0.357     | 0.089     | 0.128         |
| <b><sup>1</sup>4b</b> | 0.366     | -0.134    | -0.346    | 0.12          |
| <b><sup>3</sup>5b</b> | 0.375     | 0.382     | 0.135     | 0.103         |
| <b><sup>1</sup>5b</b> | 0.389     | -0.148    | -0.379    | 0.14          |

Table S13: Energy decomposition analysis for all reactions used in this study.

| Reaction   | $\Delta E^\#$<br>(gas) | $\Delta E_{steric}$ | $\Delta E_{orb}$ | $\Delta E_{int}$ | $\Delta E_{strain}$ | $\Delta E_{strain(catalyst)}$ | $\Delta E_{strain(substrate)}$ |
|------------|------------------------|---------------------|------------------|------------------|---------------------|-------------------------------|--------------------------------|
| <b>R1</b>  | 26.7                   | 183.0               | -239.4           | -56.3            | 83.0                | 10.6                          | 72.4                           |
| <b>R2</b>  | 19.5                   | 166.7               | -224.5           | -57.8            | 77.3                | 12.2                          | 65.1                           |
| <b>R3</b>  | 11.2                   | 130.7               | -177.7           | -47.0            | 58.2                | 8.5                           | 49.7                           |
| <b>R4</b>  | 21.7                   | 150.4               | -203.5           | -53.1            | 74.7                | 14.9                          | 59.8                           |
| <b>R5</b>  | 21.3                   | 127.5               | -185.9           | -58.4            | 79.6                | 30.2                          | 49.4                           |
| <b>R6</b>  | 25.5                   | 201.7               | -274.1           | -72.3            | 97.8                | 14.6                          | 83.2                           |
| <b>R7</b>  | 16.1                   | 189.2               | -266.7           | -77.4            | 93.6                | 15.9                          | 77.7                           |
| <b>R8</b>  | 7.3                    | 152.8               | -214.5           | -61.7            | 69.0                | 12.6                          | 56.3                           |
| <b>R9</b>  | 6.9                    | 160.7               | -242.2           | -81.5            | 88.4                | 26.0                          | 62.5                           |
| <b>R10</b> | -6.6                   | 119.9               | -199.6           | -79.7            | 73.1                | 31.4                          | 41.7                           |
| <b>R11</b> | 48.3                   | 259.7               | -344.8           | -85.0            | 133.4               | 14.2                          | 119.1                          |
| <b>R12</b> | 40.9                   | 247.0               | -332.8           | -85.8            | 126.6               | 14.8                          | 111.8                          |
| <b>R13</b> | 30.9                   | 212.7               | -280.2           | -67.5            | 98.4                | 11.8                          | 86.6                           |
| <b>R14</b> | 36.2                   | 219.0               | -298.5           | -79.5            | 115.7               | 23.6                          | 92.1                           |
| <b>R15</b> | 26.7                   | 185.1               | -257.4           | -72.3            | 99.1                | 29.0                          | 70.1                           |

Table S14: Wigner transmission coefficients of reactions R1-R15 at different temperatures.

| T(K)       | 138K  | 158K  | 178K | 198K | 218K | 238K | 258K | 278K | 298K |
|------------|-------|-------|------|------|------|------|------|------|------|
| <b>R1</b>  | 11.43 | 8.96  | 7.27 | 6.07 | 5.18 | 4.51 | 3.98 | 3.57 | 3.24 |
| <b>R2</b>  | 9.44  | 7.44  | 6.07 | 5.10 | 4.38 | 3.84 | 3.41 | 3.08 | 2.81 |
| <b>R3</b>  | 5.62  | 4.52  | 3.77 | 3.24 | 2.85 | 2.55 | 2.32 | 2.14 | 1.99 |
| <b>R4</b>  | 6.64  | 5.30  | 4.39 | 3.74 | 3.26 | 2.90 | 2.61 | 2.39 | 2.21 |
| <b>R5</b>  | 2.08  | 1.82  | 1.65 | 1.52 | 1.43 | 1.36 | 1.31 | 1.27 | 1.23 |
| <b>R6</b>  | 13.94 | 10.87 | 8.77 | 7.28 | 6.18 | 5.35 | 4.70 | 4.19 | 3.77 |
| <b>R7</b>  | 12.33 | 9.64  | 7.81 | 6.50 | 5.54 | 4.81 | 4.24 | 3.79 | 3.43 |
| <b>R8</b>  | 9.76  | 7.68  | 6.26 | 5.25 | 4.51 | 3.94 | 3.51 | 3.16 | 2.88 |
| <b>R9</b>  | 8.72  | 6.89  | 5.64 | 4.75 | 4.09 | 3.59 | 3.21 | 2.90 | 2.65 |
| <b>R10</b> | 2.20  | 1.91  | 1.72 | 1.58 | 1.48 | 1.40 | 1.34 | 1.30 | 1.26 |
| <b>R11</b> | 13.86 | 10.81 | 8.73 | 7.25 | 6.16 | 5.33 | 4.68 | 4.17 | 3.76 |
| <b>R12</b> | 13.53 | 10.56 | 8.53 | 7.09 | 6.02 | 5.21 | 4.58 | 4.09 | 3.69 |
| <b>R13</b> | 15.45 | 12.02 | 9.68 | 8.02 | 6.79 | 5.86 | 5.13 | 4.56 | 4.10 |
| <b>R14</b> | 14.07 | 10.97 | 8.86 | 7.35 | 6.24 | 5.39 | 4.74 | 4.22 | 3.80 |
| <b>R15</b> | 11.61 | 9.09  | 7.38 | 6.15 | 5.25 | 4.57 | 4.04 | 3.61 | 3.27 |

Table S15: Zero curvature tunneling (ZCT) transmission coefficients of reactions **R1-R15**.

| <b>T(K)</b> | <b>298K</b> |
|-------------|-------------|
| <b>R1</b>   | 4.62        |
| <b>R2</b>   | 3.99        |
| <b>R3</b>   | 4.42        |
| <b>R4</b>   | 3.5         |
| <b>R5</b>   | -           |
| <b>R6</b>   | 3.17        |
| <b>R7</b>   | 3.16        |
| <b>R8</b>   | 2.11        |
| <b>R9</b>   | 4.43        |
| <b>R10</b>  | -           |
| <b>R11</b>  | 2.47        |
| <b>R12</b>  | 3.83        |
| <b>R13</b>  | 3.58        |
| <b>R14</b>  | 2.87        |
| <b>R15</b>  | 2.95        |

Table S16: Small curvature tunneling (SCT) transmission coefficients of reactions **R1-R15**.

| <b>T(K)</b> | <b>298</b> |
|-------------|------------|
| <b>R1</b>   | 140.73     |
| <b>R2</b>   | 43.21      |
| <b>R3</b>   | 13.58      |
| <b>R4</b>   | 9.81       |
| <b>R5</b>   | -          |
| <b>R6</b>   | 6.88       |
| <b>R7</b>   | 19.00      |
| <b>R8</b>   | 13.16      |
| <b>R9</b>   | 29.78      |
| <b>R10</b>  | -          |
| <b>R11</b>  | 6.71       |
| <b>R12</b>  | 14.23      |
| <b>R13</b>  | 17.95      |
| <b>R14</b>  | 12.71      |
| <b>R15</b>  | 6.32       |

Table S17: Wiberg bond index of transition states of reactions **R1-R15**.

| <b>Reaction</b> | <b>O3-H<sub>sub</sub></b> | <b>O2-H<sub>sub</sub></b> | <b>(O3-H<sub>sub</sub>)-(O2-H<sub>sub</sub>)</b> |
|-----------------|---------------------------|---------------------------|--------------------------------------------------|
| <b>R1</b>       | 0.44                      | 0.33                      | 0.11                                             |
| <b>R2</b>       | 0.46                      | 0.3                       | 0.16                                             |
| <b>R3</b>       | 0.5                       | 0.25                      | 0.25                                             |
| <b>R4</b>       | 0.49                      | 0.27                      | 0.22                                             |
| <b>R5</b>       | 0.51                      | 0.23                      | 0.28                                             |
| <b>R6</b>       | 0.42                      | 0.36                      | 0.06                                             |
| <b>R7</b>       | 0.43                      | 0.35                      | 0.08                                             |
| <b>R8</b>       | 0.47                      | 0.3                       | 0.17                                             |
| <b>R9</b>       | 0.46                      | 0.3                       | 0.16                                             |
| <b>R10</b>      | 0.52                      | 0.22                      | 0.3                                              |
| <b>R11</b>      | 0.35                      | 0.43                      | -0.08                                            |
| <b>R12</b>      | 0.36                      | 0.42                      | -0.06                                            |
| <b>R13</b>      | 0.4                       | 0.38                      | 0.02                                             |
| <b>R14</b>      | 0.39                      | 0.38                      | 0.01                                             |
| <b>R15</b>      | 0.44                      | 0.32                      | 0.12                                             |

Table S18:Natural charges of Transition states of reactions **R1-R15**.

| <b>Reaction</b> | <b>O1</b> | <b>O2</b> | <b>H(sub)</b> | <b>N1</b> | <b>N2</b> | <b>Cu</b> | <b>O3*H+O2*H</b> |
|-----------------|-----------|-----------|---------------|-----------|-----------|-----------|------------------|
| <b>R1</b>       | -0.307    | -0.324    | 0.453         | --        | --        | 0.809     | -0.454359        |
| <b>R2</b>       | -0.322    | -0.368    | 0.462         | -0.75     | --        | 0.837     | -0.486486        |
| <b>R3</b>       | 0.465     | -0.342    | -0.405        | -0.745    | -0.749    | 0.863     | 0.41391          |
| <b>R4</b>       | -0.351    | -0.323    | 0.465         | -0.613    | --        | 0.814     | -0.459885        |
| <b>R5</b>       | -0.356    | -0.373    | 0.482         | -0.614    | -0.624    | 0.817     | -0.498388        |
| <b>R6</b>       | -0.324    | -0.36     | 0.45          | --        |           | 0.823     | -0.4347          |
| <b>R7</b>       | -0.35     | -0.419    | 0.459         | -0.749    | --        | 0.851     | -0.464967        |
| <b>R8</b>       | -0.431    | -0.382    | 0.456         | -0.743    | -0.751    | 0.873     | -0.447336        |
| <b>R9</b>       | -0.356    | -0.442    | 0.468         | -0.618    | --        | 0.826     | -0.47268         |
| <b>R10</b>      | -0.388    | -0.502    | 0.486         | -0.619    | -0.617    | 0.857     | -0.51516         |
| <b>R11</b>      | -0.32     | -0.351    | 0.45          | --        |           | 0.851     | -0.42795         |
| <b>R12</b>      | -0.342    | -0.4      | 0.457         | -0.747    | --        | 0.873     | -0.451516        |
| <b>R13</b>      | -0.427    | -0.362    | 0.449         | -0.748    | -0.74     | 0.895     | -0.428346        |
| <b>R14</b>      | -0.347    | -0.421    | 0.461         | -0.617    | --        | 0.858     | -0.452702        |
| <b>R15</b>      | -0.382    | -0.472    | 0.471         | -0.616    | -0.617    | 0.882     | -0.477594        |



Table S19: Kinetic isotopic effect (KIE) of reactions **R1-R15**.

| <b>T(K)</b> | <b>138K</b> | <b>158K</b> | <b>178K</b> | <b>198K</b> | <b>218K</b> | <b>238K</b> | <b>258K</b> | <b>278K</b> | <b>298K</b> |
|-------------|-------------|-------------|-------------|-------------|-------------|-------------|-------------|-------------|-------------|
| <b>R1</b>   | 36.1        | 23.6        | 16.9        | 13.0        | 10.5        | 8.8         | 7.6         | 6.7         | 6.0         |
| <b>R2</b>   | 32.8        | 21.6        | 15.7        | 12.1        | 9.9         | 8.3         | 7.2         | 6.3         | 5.7         |
| <b>R3</b>   | 23.7        | 16.3        | 12.2        | 9.6         | 8.0         | 6.8         | 6.0         | 5.3         | 4.8         |
| <b>R4</b>   | 26.7        | 18.1        | 13.4        | 10.5        | 8.7         | 7.4         | 6.4         | 5.7         | 5.2         |
| <b>R5</b>   | 29.9        | 20.0        | 14.7        | 11.5        | 9.4         | 8.0         | 6.9         | 6.2         | 5.6         |
| <b>R6</b>   | 29.5        | 19.5        | 14.2        | 11.1        | 9.1         | 7.7         | 6.7         | 5.9         | 5.3         |
| <b>R7</b>   | 24.7        | 16.9        | 12.6        | 10.0        | 8.3         | 7.1         | 6.2         | 5.5         | 5.0         |
| <b>R8</b>   | 22.8        | 15.7        | 11.8        | 9.4         | 7.9         | 6.8         | 5.9         | 5.3         | 4.8         |
| <b>R9</b>   | 24.0        | 16.4        | 12.2        | 9.7         | 8.0         | 6.9         | 6.0         | 5.4         | 4.9         |
| <b>R10</b>  | 12.6        | 9.2         | 7.2         | 5.9         | 5.1         | 4.5         | 4.0         | 3.6         | 3.4         |
| <b>R11</b>  | 23.6        | 15.9        | 11.8        | 9.2         | 7.6         | 6.5         | 5.6         | 5.0         | 4.5         |
| <b>R12</b>  | 19.3        | 13.3        | 10.1        | 8.0         | 6.7         | 5.8         | 5.1         | 4.6         | 4.2         |
| <b>R13</b>  | 27.1        | 18.3        | 13.5        | 10.6        | 8.7         | 7.4         | 6.5         | 5.8         | 5.2         |
| <b>R14</b>  | 19.3        | 13.3        | 10.1        | 8.0         | 6.7         | 5.8         | 5.1         | 4.6         | 4.2         |
| <b>R15</b>  | 33.6        | 21.6        | 15.4        | 11.8        | 9.4         | 7.9         | 6.8         | 5.9         | 5.3         |

Table S20: Kinetic isotopic effect (KIE) and Imaginary frequencies of transition states of all reactions **R1-R15** (\*wiberg bond order).

| <b>Reaction</b> | <b>KIE</b> | <b>(O3-H<sub>sub</sub>)-<br/>(O2-H<sub>sub</sub>)*</b> | <b>Imaginary<br/>Frequency</b> |
|-----------------|------------|--------------------------------------------------------|--------------------------------|
| <b>R1</b>       | 6.0        | 0.11                                                   | -1517.45                       |
| <b>R2</b>       | 5.7        | 0.16                                                   | -1364.88                       |
| <b>R3</b>       | 4.8        | 0.25                                                   | -1009.35                       |
| <b>R4</b>       | 5.2        | 0.22                                                   | -1116.04                       |
| <b>R5</b>       | 5.6        | 0.28                                                   | -488.38                        |
| <b>R6</b>       | 5.3        | 0.06                                                   | -1689.78                       |
| <b>R7</b>       | 5.0        | 0.08                                                   | -1581.59                       |
| <b>R8</b>       | 4.8        | 0.17                                                   | -1390.45                       |
| <b>R9</b>       | 4.9        | 0.16                                                   | -1305.14                       |
| <b>R10</b>      | 3.4        | 0.3                                                    | -514.44                        |
| <b>R11</b>      | 4.5        | -0.08                                                  | -1685.11                       |
| <b>R12</b>      | 4.2        | -0.06                                                  | -1662.94                       |
| <b>R13</b>      | 5.2        | 0.02                                                   | -1785.67                       |
| <b>R14</b>      | 4.2        | 0.01                                                   | -1698.61                       |
| <b>R15</b>      | 5.3        | 0.12                                                   | -1530.20                       |

Table S21: Structural parameters of different catalysts used in this study **1d-5d** (OSS=Open shell singlet and CSS=closed shell singlet).

| Complex                             | Cu1-O1 | Cu1-O2 | O1-O2 | Cu1'-O2 | Cu1'-O1 | Cu1-Cu1' | Cu1-N1 | Cu1-N2 | Cu1-N3 | Cu1-N4 | Cu1'-N1' | Cu1'-N2' | Cu1'-N3' | Cu1'-N4' |
|-------------------------------------|--------|--------|-------|---------|---------|----------|--------|--------|--------|--------|----------|----------|----------|----------|
| <b><sup>3</sup>1d</b>               | 1.992  | 2.859  | 1.322 | 1.990   | 2.857   | 4.532    | 2.164  | 2.143  | 2.161  | 2.232  | 2.160    | 2.164    | 2.143    | 2.227    |
| <b><sup>1</sup>1d<sub>CSS</sub></b> | 1.947  | 2.750  | 1.335 | 1.947   | 2.750   | 4.574    | 2.107  | 2.152  | 2.162  | 2.220  | 2.162    | 2.107    | 2.152    | 2.220    |
| <b><sup>1</sup>1d<sub>OSS</sub></b> | 1.951  | 2.819  | 1.350 | 1.951   | 2.819   | 4.451    | 2.161  | 2.153  | 2.149  | 2.216  | 2.149    | 2.161    | 2.153    | 2.216    |
| <b><sup>3</sup>2d</b>               | 1.954  | 2.873  | 1.366 | 1.972   | 2.840   | 4.489    | 2.178  | 2.128  | 2.204  | 2.168  | 2.180    | 2.179    | 2.169    | 2.190    |
| <b><sup>1</sup>2d<sub>OSS</sub></b> | 1.949  | 2.812  | 1.399 | 1.936   | 2.835   | 4.562    | 2.179  | 2.162  | 2.160  | 2.177  | 2.167    | 2.173    | 2.145    | 2.157    |
| <b><sup>1</sup>2d<sub>CSS</sub></b> | 1.975  | 2.851  | 1.347 | 1.977   | 2.837   | 4.709    | 2.150  | 2.151  | 2.162  | 2.190  | 2.135    | 2.170    | 2.172    | 2.188    |
| <b><sup>3</sup>3d</b>               | 1.937  | 2.852  | 1.430 | 1.931   | 2.795   | 4.594    | 2.188  | 2.196  | 2.176  | 2.110  | 2.153    | 2.249    | 2.206    | 2.119    |
| <b><sup>1</sup>3d<sub>CSS</sub></b> | 1.956  | 2.820  | 1.362 | 1.956   | 2.813   | 4.655    | 2.192  | 2.241  | 2.174  | 2.155  | 2.185    | 2.156    | 2.247    | 2.143    |
| <b><sup>1</sup>3d<sub>OSS</sub></b> | 1.926  | 2.810  | 1.430 | 1.928   | 2.822   | 4.606    | 2.227  | 2.192  | 2.168  | 2.121  | 2.218    | 2.166    | 2.176    | 2.109    |
| <b><sup>3</sup>4d</b>               | 1.997  | 2.965  | 1.365 | 1.984   | 2.811   | 4.608    | 2.184  | 2.133  | 2.187  | 2.228  | 2.045    | 2.084    | 2.487    | 2.179    |
| <b><sup>1</sup>4d<sub>CSS</sub></b> | 1.990  | 2.954  | 1.344 | 1.981   | 2.781   | 4.682    | 2.085  | 2.269  | 2.150  | 2.219  | 2.466    | 2.050    | 2.061    | 2.197    |
| <b><sup>1</sup>4d<sub>OSS</sub></b> | 1.961  | 2.938  | 1.397 | 1.963   | 2.777   | 4.586    | 2.172  | 2.110  | 2.207  | 2.208  | 2.044    | 2.491    | 2.064    | 2.172    |
| <b><sup>3</sup>5d</b>               | 1.925  | 2.743  | 1.434 | 1.916   | 2.858   | 4.566    | 2.136  | 2.316  | 2.220  | 2.109  | 2.088    | 2.399    | 2.213    | 2.088    |
| <b><sup>1</sup>5d<sub>CSS</sub></b> | 1.961  | 2.856  | 1.355 | 1.970   | 2.892   | 4.713    | 2.233  | 2.120  | 2.261  | 2.145  | 2.281    | 2.264    | 2.125    | 2.139    |
| <b><sup>1</sup>5d<sub>OSS</sub></b> | 1.917  | 2.728  | 1.426 | 1.910   | 2.848   | 4.555    | 2.125  | 2.343  | 2.221  | 2.110  | 2.382    | 2.202    | 2.100    | 2.088    |

Table S22: Selected atom spin densities of different complexes **1d-5d**.

| <b>Complex</b>                      | <b>Cu1</b> | <b>O1</b> | <b>O2</b> | <b>Cu1'</b> | <b>L</b> | <b>L'</b> |
|-------------------------------------|------------|-----------|-----------|-------------|----------|-----------|
| <b><sup>3</sup>1d</b>               | 0.315      | 0.579     | 0.580     | 0.318       | 0.103    | 0.103     |
| <b><sup>1</sup>1d<sub>CSS</sub></b> | 0.00       | 0.00      | 0.00      | 0.00        | 0.00     | 0.00      |
| <b><sup>1</sup>1d<sub>OSS</sub></b> | 0.376      | 0.155     | -0.155    | -0.376      | 0.14     | -0.12     |
| <b><sup>3</sup>2d</b>               | 0.433      | 0.428     | 0.433     | 0.398       | 0.157    | 0.157     |
| <b><sup>1</sup>2d<sub>CSS</sub></b> | 0.00       | 0.00      | 0.00      | 0.00        | 0.00     | 0.00      |
| <b><sup>1</sup>2d<sub>OSS</sub></b> | 0.451      | 0.199     | -0.151    | -0.481      | 0.16     | -0.17     |
| <b><sup>3</sup>3d</b>               | 0.529      | 0.240     | 0.235     | 0.537       | 0.213    | 0.228     |
| <b><sup>1</sup>3d<sub>CSS</sub></b> | 0.00       | 0.00      | 0.00      | 0.00        | 0.00     | 0.00      |
| <b><sup>1</sup>3d<sub>OSS</sub></b> | 0.532      | 0.165     | -0.152    | -0.535      | 0.213    | -0.22     |
| <b><sup>3</sup>4d</b>               | 0.345      | 0.455     | 0.468     | 0.436       | 0.179    | 0.17      |
| <b><sup>1</sup>4d<sub>CSS</sub></b> | 0.00       | 0.00      | 0.00      | 0.00        | 0.00     | 0.00      |
| <b><sup>1</sup>4d<sub>OSS</sub></b> | 0.484      | 0.112     | -0.253    | -0.408      | 0.198    | -0.139    |
| <b><sup>3</sup>5d</b>               | 0.538      | 0.242     | 0.211     | 0.545       | 0.217    | 0.217     |
| <b><sup>1</sup>5d<sub>CSS</sub></b> | 0.00       | 0.00      | 0.00      | 0.00        | 0.00     | 0.00      |
| <b><sup>1</sup>5d<sub>OSS</sub></b> | 0.525      | 0.174     | -0.146    | -0.534      | 0.23     | -0.22     |

Table S23: Energetics of different spin states of complexes **1d-5d**

| Complex   | S=1 | S=0(closed shell singlet) | S=0(open shell singlet) |
|-----------|-----|---------------------------|-------------------------|
| <b>1d</b> | 0.0 | 59.4                      | 78.8                    |
| <b>2d</b> | 0.0 | 64.3                      | 73.0                    |
| <b>3d</b> | 0.0 | 80.4                      | 92.5                    |
| <b>4d</b> | 0.0 | 68.9                      | 77.2                    |
| <b>5d</b> | 0.0 | 64.5                      | 90.5                    |

Table S24: Selected structural parameters of transition state of dimerisation.

| Complex            | Cu1'-<br>O2 | Cu1'-<br>O1 | O1-O2 | Cu1-<br>O1 | Cu1-<br>O2 | Cu1'-<br>Cu1 | Cu1'-<br>N1' | Cu1'-<br>N2' | Cu1'-<br>N3' | Cu1'-<br>N4' | Cu1-<br>N1 | Cu1-<br>N2 | Cu1-<br>N3 | Cu1-<br>N4 |
|--------------------|-------------|-------------|-------|------------|------------|--------------|--------------|--------------|--------------|--------------|------------|------------|------------|------------|
| ${}^3TS_{1d}^{1a}$ | 2.700       | 3.510       | 1.276 | 2.027      | 2.856      | 5.455        | 2.105        | 2.109        | 2.110        | 2.273        | 2.139      | 2.141      | 2.147      | 2.200      |
| ${}^3TS_{2d}^{2a}$ | 2.950       | 3.948       | 1.287 | 2.008      | 2.816      | 5.722        | 2.110        | 2.104        | 2.101        | 2.253        | 2.138      | 2.187      | 2.149      | 2.154      |
| ${}^3TS_{3d}^{3a}$ | 2.850       | 3.727       | 1.312 | 1.988      | 2.906      | 5.468        | 2.114        | 2.140        | 2.155        | 2.229        | 2.181      | 2.192      | 2.172      | 2.111      |
| ${}^3TS_{4d}^{4a}$ | 2.700       | 3.766       | 1.302 | 1.991      | 2.809      | 5.347        | 2.089        | 2.138        | 2.130        | 2.266        | 2.448      | 2.083      | 2.061      | 2.138      |
| ${}^3TS_{5d}^{5a}$ | 2.750       | 3.670       | 1.291 | 2.003      | 2.914      | 5.559        | 2.122        | 2.164        | 2.122        | 2.263        | 2.128      | 2.246      | 2.128      | 2.124      |

Table S25: Selected atom spin densities of transition state of dimeristaion.

| <b>Complex</b>     | <b>Cu1'</b> | <b>O1</b> | <b>O2</b> | <b>Cu1</b> | <b>L'</b> | <b>L</b> |
|--------------------|-------------|-----------|-----------|------------|-----------|----------|
| ${}^3TS_{1d}^{1a}$ | 0.04        | 0.770     | 0.717     | 0.326      | 0.00      | 0.10     |
| ${}^3TS_{2d}^{2a}$ | 0.01        | 0.740     | 0.667     | 0.392      | 0.00      | 0.08     |
| ${}^3TS_{3d}^{3a}$ | 0.07        | 0.617     | 0.593     | 0.466      | 0.00      | 0.11     |
| ${}^3TS_{4d}^{4a}$ | 0.03        | 0.669     | 0.629     | 0.453      | 0.00      | 0.19     |
| ${}^3TS_{5d}^{5a}$ | 0.05        | 0.682     | 0.655     | 0.396      | 0.00      | 0.17     |

Table S26: Free energies and activation free energies of all reaction **R1-R15**

| <b>Reaction</b> | $\Delta G_1^0$<br>(kJ/mol) | $\Delta G_2^0$<br>(kJ/mol) | $\Delta G_3^0$<br>(kJ/mol) | $\Delta G_2^\#$<br>(kJ/mol) | $\Delta G_3^\#$<br>(kJ/mol) | $\Delta G_2^\# - \Delta G_3^\#$<br>(kJ/mol) |
|-----------------|----------------------------|----------------------------|----------------------------|-----------------------------|-----------------------------|---------------------------------------------|
| <b>R1</b>       | -5.1                       | 16.0                       | 41.6                       | 86.4                        | 55.8                        | 30.6                                        |
| <b>R2</b>       | -12.9                      | 1.5                        | 39.9                       | 80.6                        | 60.6                        | 20                                          |
| <b>R3</b>       | -13.0                      | -2.3                       | 37.9                       | 77.6                        | 71.4                        | 6.2                                         |
| <b>R4</b>       | -20.8                      | 6.9                        | 75.6                       | 89.9                        | 82                          | 7.9                                         |
| <b>R5</b>       | -23.4                      | 7.3                        | 94.1                       | 102.6                       | 96.9                        | 5.7                                         |
| <b>R6</b>       | -5.1                       | 41.8                       | 41.6                       | 84.3                        | 55.8                        | 28.5                                        |
| <b>R7</b>       | -12.9                      | 27.2                       | 39.9                       | 75.3                        | 60.6                        | 14.7                                        |
| <b>R8</b>       | -13.0                      | 23.4                       | 37.9                       | 70.4                        | 71.4                        | -1                                          |
| <b>R9</b>       | -20.8                      | 32.6                       | 75.6                       | 78.2                        | 82                          | -3.8                                        |
| <b>R10</b>      | -23.4                      | 33.0                       | 94.1                       | 89.4                        | 96.9                        | -7.5                                        |
| <b>R11</b>      | -5.1                       | 67.1                       | 41.6                       | 97.2                        | 55.8                        | 41.4                                        |
| <b>R12</b>      | -12.9                      | 52.6                       | 39.9                       | 92.0                        | 60.6                        | 31.4                                        |
| <b>R13</b>      | -13.0                      | 48.8                       | 37.9                       | 86.6                        | 71.4                        | 15.2                                        |
| <b>R14</b>      | -20.8                      | 57.9                       | 75.6                       | 94.2                        | 82                          | 12.2                                        |
| <b>R15</b>      | -23.4                      | 58.4                       | 94.1                       | 106.3                       | 96.9                        | 9.4                                         |



Table S27: Vertical bond strength (D) and bond dissociation energies (BDE) of different reactions **R1-R15** (See Figure S26 and related data for description of all variables used here).

| Reaction   | $D_{H-X}(\text{kJ/mol})$ | $D_{H-Y}(\text{kJ/mol})$ | $BDE_{H-X}(\text{kJ/mol})$ | $BDE_{H-Y}(\text{kJ/mol})$ | $G_r(\text{kJ/mol})$ | $G_p(\text{kJ/mol})$ | $B_{XHY}(\text{kJ/mol})$ | $\Delta E_{rp}(\text{kJ/mol})$ | $\Delta E_{VB}^\#(1)(\text{kJ/mol})$ | $\Delta E_{VB}^\#(2)(\text{kJ/mol})$ |
|------------|--------------------------|--------------------------|----------------------------|----------------------------|----------------------|----------------------|--------------------------|--------------------------------|--------------------------------------|--------------------------------------|
| <b>R1</b>  | 337.5                    | 363.5                    | 305.2                      | 318.0                      | 727.0                | 675.0                | 155.8                    | 16.0                           | 62.5                                 | 62.7                                 |
| <b>R2</b>  | 360.4                    | 363.5                    | 322.2                      | 318.0                      | 727.0                | 720.9                | 160.0                    | 1.5                            | 57.9                                 | 57.9                                 |
| <b>R3</b>  | 357.6                    | 363.5                    | 322.8                      | 318.0                      | 727.0                | 715.2                | 160.2                    | -2.3                           | 55.0                                 | 55.0                                 |
| <b>R4</b>  | 362.7                    | 363.5                    | 316.7                      | 318.0                      | 727.0                | 725.3                | 158.7                    | 6.9                            | 62.6                                 | 62.6                                 |
| <b>R5</b>  | 371.6                    | 363.5                    | 328.8                      | 318.0                      | 727.0                | 743.3                | 161.7                    | 7.3                            | 62.5                                 | 62.5                                 |
| <b>R6</b>  | 337.5                    | 378.7                    | 305.2                      | 344.4                      | 757.4                | 675.0                | 162.4                    | 41.8                           | 73.3                                 | 74.5                                 |
| <b>R7</b>  | 360.4                    | 378.7                    | 322.2                      | 344.4                      | 757.4                | 720.9                | 166.7                    | 27.2                           | 68.7                                 | 69.2                                 |
| <b>R8</b>  | 357.6                    | 378.7                    | 322.8                      | 344.4                      | 757.4                | 715.2                | 166.8                    | 23.4                           | 70.4                                 | 70.8                                 |
| <b>R9</b>  | 362.7                    | 378.7                    | 316.7                      | 344.4                      | 757.4                | 725.3                | 165.3                    | 32.6                           | 68.8                                 | 69.5                                 |
| <b>R10</b> | 371.6                    | 378.7                    | 328.8                      | 344.4                      | 757.4                | 743.3                | 168.3                    | 33.0                           | 73.3                                 | 74.0                                 |
| <b>R11</b> | 337.5                    | 400.1                    | 305.2                      | 371.9                      | 800.2                | 675.0                | 169.3                    | 67.1                           | 85.6                                 | 88.6                                 |
| <b>R12</b> | 360.4                    | 400.1                    | 322.2                      | 371.9                      | 800.2                | 720.9                | 173.5                    | 52.6                           | 80.9                                 | 82.8                                 |
| <b>R13</b> | 357.6                    | 400.1                    | 322.8                      | 371.9                      | 800.2                | 715.2                | 173.7                    | 48.8                           | 78.0                                 | 79.6                                 |
| <b>R14</b> | 362.7                    | 400.1                    | 316.7                      | 371.9                      | 800.2                | 725.3                | 172.1                    | 57.9                           | 85.7                                 | 87.9                                 |
| <b>R15</b> | 371.6                    | 400.1                    | 328.8                      | 371.9                      | 800.2                | 743.3                | 175.2                    | 58.4                           | 85.5                                 | 87.7                                 |

Table S28: Different Descriptors and target variables used in the regression model.

| Feature index | Feature name                 |
|---------------|------------------------------|
| F01           | $BV_{tot}$                   |
| F02           | $\Sigma E$ ( kJ/mol)         |
| F03           | $\Delta E_{BDE}$ ( KJ/mol)   |
| F04           | $E_{FMO}$ ( eV)              |
| F05           | $\eta$ ( meV)                |
| F06           | $\lambda$ ( meV),            |
| F07           | $\Delta G_{ET}$ (kJ/mol)     |
| F08           | $\Delta G_{PT}$ (kJ/mol)     |
| F09           | $\Delta G_{PCET}$ (kJ/mol)   |
| F10           | $\Delta P_{eff}^{ka}$        |
| F11           | $\Delta E_{eff}^o$ [meV]     |
| F12           | $\Delta E^o(H)$ [meV]        |
| F13           | HB (kJ/mol)                  |
| F14           | $J$ (cm <sup>-1</sup> )      |
| F15           | $\sigma$ (kJ/mol)            |
| T02           | $\Delta G_2^\#$ (kJ/mol)     |
| T01           | $\Delta G_{tot}^\#$ (kJ/mol) |

F01 -  $BV_{tot}$  =%V Buried volume of catalyst+%V Buried volume of substrate,

F02-  $\Sigma E$  ( kJ/mol)=  $E_{BDE}^{catalyst} + E_{BDE}^{substrate}$  (where,  $E_{BDE}^{Cu-OOH}$   $E_{BDE}^{substrate}$  are BDE of copper hydroperoxo complex and BDE of substrate respectively )

F02- $\Delta E_{BDE}$  ( KJ/mol)= $E_{BDE}^{catalyst} - E_{BDE}^{substrate}$  (where,  $E_{BDE}^{Cu-OOH}$   $E_{BDE}^{substrate}$  are BDE of copper hydroperoxo complex and BDE of substrate respectively )

F04 -  $E_{FMO}$  ( eV) =  $E_{LUMO}$  (Alpha orbital) of catalyst +  $E_{HOMO}$  (Alpha orbital) of substrate

For details of F05-F09, See Figure S24 and related data.

For details of F10-F12 See Figure S26 and related data.

F13-HB (HB=strenth of H-bond interaction)

F14-  $J$  (cm<sup>-1</sup>) ( $J$ =Exchange coupling constant)

F15 -  $\sigma$  (kJ/mol) ( $\sigma = \Delta G_{PT} + \Delta G_{ET}$ )

T01-  $\Delta G_{tot}^\#$  (kJ/mol) ( $\Delta G_{tot}^\# = \Delta G_2^\# - \Delta G_3^\#$ )

Table S29: Different Descriptors values and target variables values at 298 K values used in the regression model .

| <b>F00</b> | <b>F01</b> | <b>F02</b> | <b>F03</b> | <b>F04</b> | <b>F05</b> | <b>F06</b> | <b>F07</b> | <b>F08</b> | <b>F09</b> | <b>F10</b> | <b>F11</b> | <b>F12</b> | <b>F13</b> | <b>F14</b> | <b>F15</b> | <b>T02</b> | <b>T01</b> |
|------------|------------|------------|------------|------------|------------|------------|------------|------------|------------|------------|------------|------------|------------|------------|------------|------------|------------|
| <b>R1</b>  | 103.2      | 623.2      | -12.8      | -9.4       | 684.1      | 1339       | 193.5      | 286.9      | 16         | -9.6       | 400.6      | -166.3     | -6.5       | 1697.4     | 480.4      | 86.4       | 30.6       |
| <b>R2</b>  | 106.4      | 640.2      | 4.2        | -9.4       | 976.5      | 1606.4     | 160.1      | 293.4      | 1.5        | -11.8      | 682.5      | -15.9      | -14.5      | 1423.8     | 453.5      | 80.6       | 20         |
| <b>R3</b>  | 108.9      | 640.8      | 4.8        | -9.4       | 1058.5     | 1523.5     | 152.7      | 297.1      | -2.3       | -30.4      | 760.5      | 23.9       | -23.6      | 1094.4     | 449.8      | 77.6       | 6.2        |
| <b>R4</b>  | 107.8      | 634.7      | -1.3       | -9.5       | 809.2      | 1131.7     | 152.1      | 262.5      | 6.8        | -10.3      | 536.6      | -71.2      | -27.6      | 1572.4     | 414.6      | 89.9       | 7.9        |
| <b>R5</b>  | 113.3      | 646.8      | 10.8       | -9.4       | 1027.5     | 1324.5     | 125.8      | 266        | 7.3        | -12.9      | 688.7      | -75.6      | -17        | 1578.3     | 391.8      | 102.6      | 5.7        |
| <b>R6</b>  | 77         | 649.6      | -39.3      | -9.6       | 482.1      | 1084.1     | 221.3      | 287.1      | 41.7       | -9.4       | 124.5      | -432.8     | -6.5       | 1697.4     | 508.4      | 84.3       | 28.5       |
| <b>R7</b>  | 80.2       | 666.6      | -22.3      | -9.6       | 774.5      | 497.5      | 187.9      | 293.6      | 27.2       | -10        | 406.4      | -282.4     | -14.5      | 1423.8     | 481.5      | 75.3       | 14.7       |
| <b>R8</b>  | 82.7       | 667.2      | -21.7      | -9.5       | 856.5      | 783.5      | 180.5      | 297.4      | 23.4       | -12.3      | 484.4      | -242.6     | -23.6      | 1094.4     | 477.9      | 70.4       | -1         |
| <b>R9</b>  | 81.6       | 661.1      | -27.7      | -9.6       | 607.1      | 887.2      | 179.9      | 262.7      | 32.6       | -10.1      | 260.5      | -337.7     | -27.6      | 1572.4     | 442.6      | 78.2       | -3.8       |
| <b>R10</b> | 87.1       | 673.3      | -15.6      | -9.6       | 825.4      | 1691.4     | 153.6      | 266.2      | 33         | -12.8      | 412.6      | -342.1     | -17        | 1578.3     | 419.8      | 89.4       | -7.5       |
| <b>R11</b> | 77.1       | 677        | -66.7      | -10.2      | -35.4      | 1160.8     | 283.6      | 278.7      | 67         | -5.5       | -372.8     | -695.5     | -6.5       | 1697.4     | 562.3      | 97.2       | 41.4       |
| <b>R12</b> | 80.3       | 694        | -49.7      | -10.2      | 256.9      | 1380.5     | 250.2      | 285.2      | 53         | -7.7       | -90.9      | -545.1     | -14.5      | 1423.8     | 535.4      | 92         | 31.4       |
| <b>R13</b> | 82.8       | 694.6      | -49.1      | -10.2      | 338.9      | 893.4      | 242.7      | 289        | 48.7       | -8.3       | -13        | -600.5     | -23.6      | 1094.4     | 531.7      | 86.6       | 15.2       |
| <b>R14</b> | 81.7       | 688.5      | -55.2      | -10.3      | 89.6       | 1098.6     | 242.1      | 254.3      | 58         | -6.1       | -236.9     | -600.5     | -27.6      | 1572.4     | 496.4      | 94.2       | 12.2       |
| <b>R15</b> | 87.2       | 700.7      | -43        | -10.2      | 307.9      | 1830.3     | 215.8      | 257.9      | 58.3       | -8.8       | -84.7      | -604.8     | -17        | 1578.3     | 473.7      | 106.3      | 9.4        |

Table S30: Different Regression models (to predict T01 using feature combination {F13+F09+F08+F07}) performance metrics for Target variable T01.

| Regression Method<br>(F13+F09+F08+F07) | R <sup>2</sup> |      | Mean Absolute Error (MAE) |      | Root Mean Square Error (RMSE) |       | R <sup>2</sup> Cross-validation 4 |
|----------------------------------------|----------------|------|---------------------------|------|-------------------------------|-------|-----------------------------------|
|                                        | Train          | Test | Train                     | Test | Train                         | Test  |                                   |
| <b>Linear regression</b>               | 0.97           | 0.90 | 1.84                      | 3.20 | 2.183                         | 4.01  | 0.82                              |
| <b>Lasso</b>                           | 0.97           | 0.91 | 1.92                      | 3.15 | 2.22                          | 3.91  | 0.85                              |
| <b>Ridge</b>                           | 0.97           | 0.91 | 1.92                      | 3.15 | 2.22                          | 3.91  | 0.85                              |
| <b>Elastic net</b>                     | 0.97           | 0.91 | 1.90                      | 3.15 | 2.211                         | 3.911 | 0.85                              |

Table S31: Linear Regression model (to predict T01 using feature combination {F13+F09+F08+F07}) features coefficients and their p-values.

| Features | Coefficient <sup>#</sup> | p-value | Coefficient* |
|----------|--------------------------|---------|--------------|
| F09      | -0.8226                  | 0.000   | -18.7055     |
| F08      | -0.3075                  | 0.023   | -4.5758      |
| F07      | 0.5055                   | 0.000   | 21.8389      |
| F13      | 1.0751                   | 0.000   | 8.3484       |

# feature scaling was not performed

\* Feature scaling was performed using either min-max scaling or standard scaling techniques (both gave same coefficient values)

Normalization, also referred to as min-max scaling, reshapes features to a range spanning from 0 to 1. It involves subtracting the minimum value of the feature and dividing by the range (the maximum value minus the minimum value). Standardization alters features to possess a mean of 0 and a standard deviation of 1 by subtracting the mean and dividing by the standard deviation of the feature.

Table S32: Different Regression models features (to predict T02 using feature combination {F09+F07+F01}) performance metrics for Target variable T02.

| Regression Method(F09+F07+F01) | R <sup>2</sup> |       | Mean Absolute Error (MAE) |      | Root Mean Square Error (RMSE) |       | R <sup>2</sup> Cross-validation 4 |
|--------------------------------|----------------|-------|---------------------------|------|-------------------------------|-------|-----------------------------------|
|                                | Train          | Test  | Train                     | Test | Train                         | Test  |                                   |
| Linear regression              | 0.92           | 0.90  | 2.20                      | 2.77 | 2.616                         | 2.868 | 0.36                              |
| Lasso                          | 0.92           | 0.89  | 2.16                      | 2.90 | 2.627                         | 3.034 | 0.34                              |
| Ridge                          | 0.92           | 0.90  | 2.20                      | 2.78 | 2.616                         | 2.88  | 0.36                              |
| Elastic net                    | 0.92           | 0.890 | 2.16                      | 2.90 | 2.62                          | 3.031 | 0.36                              |

Table S33: Linear Regression model features (to predict T02 using feature combination {F09+F07+F01}) coefficients and their p-values.

| Features | Coefficient <sup>#</sup> | p-value | Coefficient <sup>*</sup> |
|----------|--------------------------|---------|--------------------------|
| F01      | 1.0715                   | 0       | 14.39113                 |
| F07      | -0.1249                  | 0.02    | -5.3942                  |
| F09      | 0.9374                   | 0       | 21.31591                 |

# feature scaling was not performed

\* Feature scaling was performed using either min-max scaling or standard scaling techniques (both gave same coefficient values)

Table S34: Selected bond lengths of optimised catalyst **1a** and analogue complex crystal

| Complex                                                               | Cu-O1 | Cu-O2 | O1-O2 |
|-----------------------------------------------------------------------|-------|-------|-------|
| [TMG <sub>3</sub> trenCu(O <sub>2</sub> )] <sup>+</sup> <sub>31</sub> | 1.927 | 2.842 | 1.280 |
| { <sup>(X1)(X2)</sup> LCu(II)-O <sub>2</sub> <sup>•-</sup> }          | 2.030 | 2.788 | 1.256 |
| [X1=H, X2=H ( <b>1a</b> )]<br>structre [Å]                            |       |       |       |

Table S35: Singlet-triplet gaps of **1a-5a** with different functionals (single point calculations with different functionals were performed on on B3-LYP optimized geometries of catalysts **1a-5a**)

| Complex   | $\Delta G_{S-T}$            |                              |                              |                               |                                            |                               |
|-----------|-----------------------------|------------------------------|------------------------------|-------------------------------|--------------------------------------------|-------------------------------|
|           | PBE/BSII/<br>/B3LYP/B<br>S1 | BP86/BSII<br>//B3LYP/B<br>S1 | PBE0/BSII<br>//B3LYP/B<br>S1 | TPSSH/BSI<br>I//B3LYP/B<br>S1 | $\omega$ -<br>B97X/BSII<br>//B3LYP/B<br>S1 | B3LYP/BSI<br>I//B3LYP/B<br>S1 |
| <b>1a</b> | 22.3                        | 24.1                         | 113.7                        | 103.4                         | 126.3                                      | 100.5                         |
| <b>2a</b> | 22.3                        | 24.1                         | 110.0                        | 86.2                          | 120.3                                      | 96.2                          |
| <b>3a</b> | 18.6                        | 26.4                         | 117.6                        | 88.3                          | 137.6                                      | 100.8                         |
| <b>4a</b> | 20.0                        | 21.5                         | 107.7                        | 80.9                          | 122.0                                      | 93.5                          |
| <b>5a</b> | 24.3                        | 30.4                         | 121.2                        | 90.8                          | 134.6                                      | 105.8                         |

$\Delta G_{S-T} = G_S - G_T$ ;  $G_T$  and  $G_{S_m}$  are Gibbs free energy of triplet and singlet species respectively.

BSII refers to TZVP(for all atoms) and BSI refers to [LanL2Dz (Cu),6-31G\*(others)] All functionals dispersion corrected)

Table S36: Singlet-triplet gaps for **1a-5a** (single point calculations with different functionals were performed on with respective functional optimized geometries of catalysts **1a-5a**)

| Complex   | $\Delta G_{S-T}$      |                         |                         |                           |                                                             |                           |
|-----------|-----------------------|-------------------------|-------------------------|---------------------------|-------------------------------------------------------------|---------------------------|
|           | PBE/BSII/<br>/PBE/BSI | BP86/BSII/<br>/BP86/BSI | PBE0/BSII/<br>/PBE0/BSI | TPSSH/BSII/<br>/TPSSH/BSI | $\omega$ -<br>B97X/<br>BSII//<br>$\omega$ -<br>B97X/<br>BSI | B3LYP/BSII/<br>/B3LYP/BSI |
| <b>1a</b> | 22.1                  | 24.9                    | 118.6                   | 88.0                      | 125.5                                                       | 100.5                     |
| <b>2a</b> | 19.4                  | 18.2                    | 103.7                   | 78.0                      | 109.7                                                       | 96.2                      |
| <b>3a</b> | 22.5                  | 16.4                    | 116.2                   | 80.4                      | 113.8                                                       | 100.8                     |
| <b>4a</b> | 18.2                  | 18.7                    | 103.7                   | 79.1                      | 18.0                                                        | 93.5                      |
| <b>5a</b> | 23.0                  | 30.5                    | 126.4                   | 91.9                      | 144.5                                                       | 105.8                     |

$\Delta G_{S-T} = G_S - G_T$ ;  $G_T$  and  $G_S$  are Gibbs free energy of triplet and singlet species respectively.



Table S37: Activation energies of reactions **R1-R5** (single point calculations with different functionals were performed on B3-LYP optimized geometries and transition states)

| Reaction  | $\Delta G_2^\ddagger$       |                              |                              |                               |                                       |                               |
|-----------|-----------------------------|------------------------------|------------------------------|-------------------------------|---------------------------------------|-------------------------------|
|           | PBE/BSII/<br>/B3LYP/B<br>S1 | BP86/BSII<br>//B3LYP/B<br>S1 | PBE0/BSII<br>//B3LYP/B<br>S1 | TPSSH/BSI<br>I//B3LYP/B<br>S1 | $\omega$ B97X/BSI<br>I//B3LYP/B<br>S1 | B3LYP/BSI<br>I//B3LYP/B<br>S1 |
| <b>R1</b> | 50.9                        | 59.2                         | 88.3                         | 80.5                          | 125.2                                 | 86.4                          |
| <b>R2</b> | 46.6                        | 54.5                         | 82.4                         | 72.3                          | 118.0                                 | 80.6                          |
| <b>R3</b> | 41.6                        | 49.9                         | 79.1                         | 68.3                          | 82.6                                  | 77.6                          |
| <b>R4</b> | 51.9                        | 63.1                         | 91.7                         | 80.6                          | 126.3                                 | 89.9                          |
| <b>R5</b> | 62.9                        | 75.6                         | 105.7                        | 92.2                          | 121.2                                 | 102.6                         |

BSII refers to TZVP(for all atoms) and BSI refers to [LanL2Dz (Cu),6-31G\*(others)]

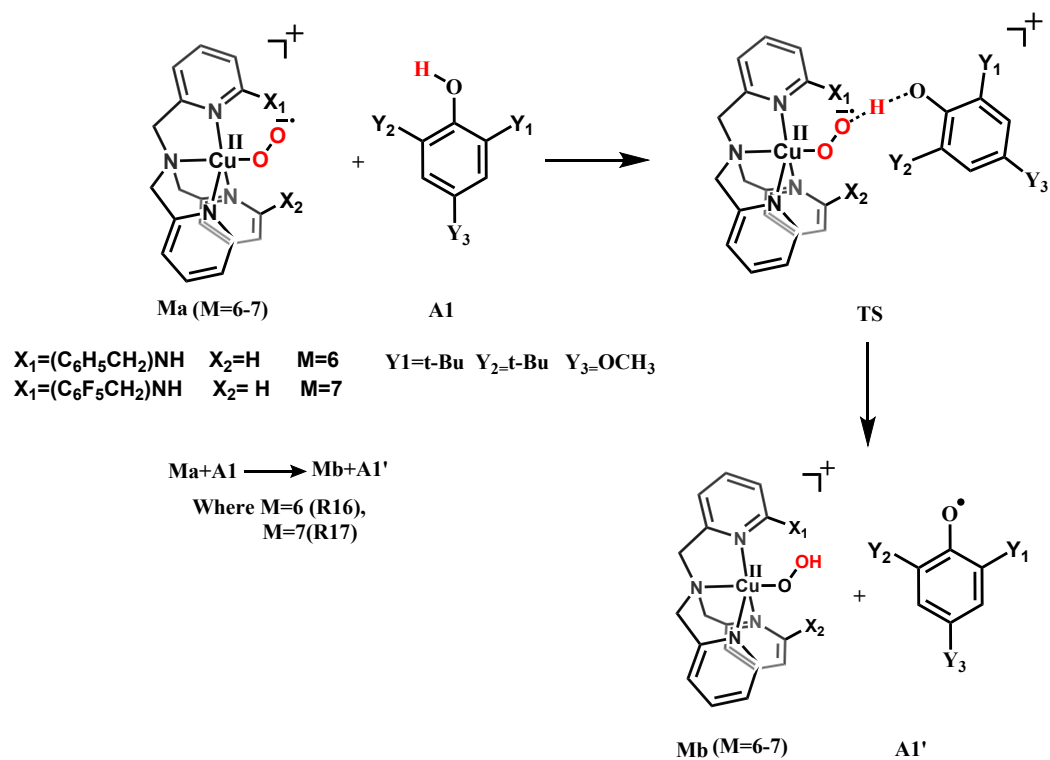

Figure S28: Different catalyst structures (**6a-7a**) which was not seen during model

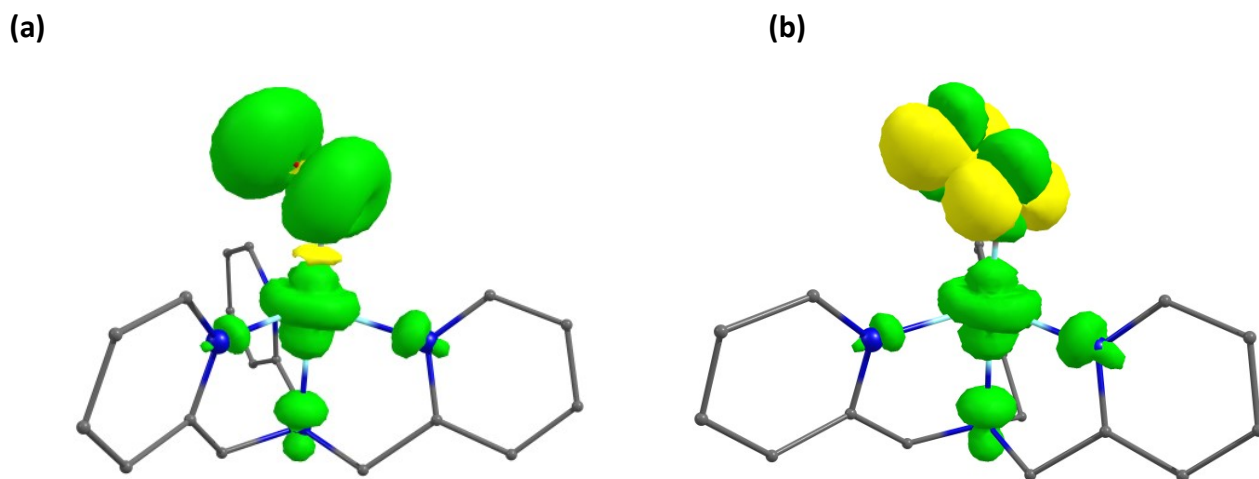

Figure S29: spin density plots of catalyst structures (**1a**) computed at DLPNO-CCSD(T) level

Table S38: Free energies and activation free energies of two unseen HAT reactions **R16-R17**.

| Reaction | $\Delta G_1^0$ (kJ/mol) | $\Delta G_2^0$ (kJ/mol) | $\Delta G_3^0$ (kJ/mol) | $\Delta G_2^\#$ (kJ/mol) | $\Delta G_3^\#$ (kJ/mol) | $\Delta G_{2-3}^\#$ (kJ/mol) |
|----------|-------------------------|-------------------------|-------------------------|--------------------------|--------------------------|------------------------------|
| R16      | -10.7                   | -0.9                    | 40.9                    | 81.2                     | 71.4                     | 9.8                          |
| R17      | -4.9                    | -0.8                    | 42.7                    | 90.0                     | 86.2                     | 3.8                          |

Table S39: Different Descriptors values for reactions **R16-R17**.

| Features | Reaction  |           |
|----------|-----------|-----------|
|          | <b>R6</b> | <b>R7</b> |
| F13      | -39.8     | -40.7     |
| F08      | 275.9     | 294.1     |
| F07      | 168.2     | 164.8     |
| F09      | -0.9      | -0.8      |

## REFERENCES

1. M. J. Frisch, G. W. Trucks, H. B. Schlegel, G. E. Scuseria, M. A. Robb, J. R. Cheeseman, G. Scalmani, V. Barone, B. Mennucci and G. Petersson, Gaussian 09, Revision D. 01, Gaussian, Inc., Wallingford CT, *See also: URL: <http://www.gaussian.com>*, 2009.
2. T. Lu and F. Chen, Multiwfn: a multifunctional wavefunction analyzer, *J. Comput. Chem.*, 2012, **33**, 580-592.
3. W. Humphrey, A. Dalke and K. Schulten, VMD: visual molecular dynamics, *J. Mol. Graph.*, 1996, **14**, 33-38.
4. J. Bigeleisen, The relative reaction velocities of isotopic molecules, *J. Chem. Phys.*, 1949, **17**, 675-678.
5. D. Ferro-Costas, D. G. Truhlar and A. Fernández-Ramos, Pilgrim: A thermal rate constant calculator and a chemical kinetics simulator, *Comput. Phys. Commun.*, 2020, **256**, 107457.
6. M. Page and J. W. McIver Jr, On evaluating the reaction path Hamiltonian, *J. Chem. Phys.*, 1988, **88**, 922-935.
7. Y. Freund and R. E. Schapire, A decision-theoretic generalization of on-line learning and an application to boosting, *J. Comput. Syst. Sci.*, 1997, **55**, 119-139.
8. L. Breiman, Random forests, *Mach. Learn.*, 2001, **45**, 5-32.
9. T. Chen and C. Guestrin, 2016.
10. S. Zhong, K. Zhang, D. Wang and H. Zhang, Shedding light on “Black Box” machine learning models for predicting the reactivity of HO radicals toward organic compounds, *Chem. Eng. J.*, 2021, **405**, 126627.
11. W. Xu, F. Long, H. Zhao, Y. Zhang, D. Liang, L. Wang, K. L. Lesnik, H. Cao, Y. Zhang and H. Liu, Performance prediction of ZVI-based anaerobic digestion reactor using machine learning algorithms, *Waste Manag.*, 2021, **121**, 59-66.
12. F. Neese, F. Wennmohs, U. Becker and C. Riplinger, The ORCA quantum chemistry program package, *J. Chem. Phys.*, 2020, **152**, 224108.
13. A. D. Becke, Density-functional thermochemistry. V. Systematic optimization of exchange-correlation functionals, *J. Chem. Phys.*, 1997, **107**, 8554-8560.
14. J. Antony and S. Grimme, Density functional theory including dispersion corrections for intermolecular interactions in a large benchmark set of biologically relevant molecules, *Phys. Chem. Chem. Phys.*, 2006, **8**, 5287-5293.
15. A. D. Becke, Density-functional exchange-energy approximation with correct asymptotic behavior, *Phys. Rev. A*, 1988, **38**, 3098-3100.
16. F. Neese, Software update: the ORCA program system, version 4.0, *WIREs Computational Molecular Science*, 2018, **8**, e1327.
17. S. E. Neale, D. A. Pantazis and S. A. Macgregor, Accurate computed spin-state energetics for Co(III) complexes: implications for modelling homogeneous catalysis, *Dalton Transactions*, 2020, **49**, 6478-6487.
18. A. Nandy, C. Duan, M. G. Taylor, F. Liu, A. H. Steeves and H. J. Kulik, Computational discovery of transition-metal complexes: from high-throughput screening to machine learning, *Chem. Rev.*, 2021, **121**, 9927-10000.
19. S. Emamian, T. Lu, H. Kruse and H. Emamian, Exploring nature and predicting strength of hydrogen bonds: A correlation analysis between atoms-in-molecules descriptors, binding energies, and energy components of symmetry-adapted perturbation theory, *J. Comput. Chem.*, 2019, **40**, 2868-2881.
20. H. J. Dale, A. G. Leach and G. C. Lloyd-Jones, Heavy-Atom Kinetic Isotope Effects: Primary Interest or Zero Point?, *J. Am. Chem. Soc.*, 2021, **143**, 21079-21099.
21. S. J. Grabowski, Theoretical studies of strong hydrogen bonds, *Annu. Rep. Prog. Chem. Sect. C: Phys. Chem.*, 2006, **102**, 131-165.
22. R. Bader, A quantum theory, *Clarendon: Oxford, UK*, 1990.

23. E. Espinosa, E. Molins and C. Lecomte, Hydrogen bond strengths revealed by topological analyses of experimentally observed electron densities, *Chem. Phys. Lett.*, 1998, **285**, 170-173.
24. O. Galvez, P. Gomez and L. Pacios, Variation with the intermolecular distance of properties dependent on the electron density in cyclic dimers with two hydrogen bonds, *J. Chem. Phys.*, 2003, **118**, 4878-4895.
25. L. F. Pacios, Topological descriptors of the electron density and the electron localization function in hydrogen bond dimers at short intermonomer distances, *J. Phys. Chem. A*, 2004, **108**, 1177-1188.
26. H. L. Schmider and A. D. Becke, Chemical content of the kinetic energy density, *J. Mol. Struct. THEOCHEM*, 2000, **527**, 51-61.
27. H. Jacobsen, Localized-orbital locator (LOL) profiles of chemical bonding, *Can. J. Chem.*, 2008, **86**, 695-702.
28. G. Saleh, C. Gatti, L. Lo Presti and J. Contreras-García, Revealing non-covalent interactions in molecular crystals through their experimental electron densities, *Chem. Eur. J.*, 2012, **18**, 15523-15536.
29. J. Contreras-García, E. R. Johnson, S. Keinan, R. Chaudret, J.-P. Piquemal, D. N. Beratan and W. Yang, NCIPLOT: a program for plotting noncovalent interaction regions, *J. Chem. Theory Comput.*, 2011, **7**, 625-632.
30. R. Chaudret, B. De Courcy, J. Contreras-Garcia, E. Gloaguen, A. Zehnacker-Rentien, M. Mons and J.-P. Piquemal, Unraveling non-covalent interactions within flexible biomolecules: from electron density topology to gas phase spectroscopy, *Phys. Chem. Chem. Phys.*, 2014, **16**, 9876-9891.
31. C. Würtele, E. Gaoutchenova, K. Harms, M. C. Holthausen, J. Sundermeyer and S. Schindler, Crystallographic characterization of a synthetic 1: 1 end-on copper dioxygen adduct complex, *Angew. Chem. Int. Ed.*, 2006, **45**, 3867-3869.

## Coordinates

### <sup>3</sup>1a

|    |              |              |              |
|----|--------------|--------------|--------------|
| Cu | 0.019014000  | -0.012897000 | -0.706634000 |
| C  | 2.950340000  | -0.855255000 | -1.320470000 |
| H  | 2.567989000  | -0.935319000 | -2.333947000 |
| C  | 4.261549000  | -1.205035000 | -1.008089000 |
| H  | 4.927473000  | -1.566033000 | -1.784462000 |
| C  | 4.682979000  | -1.086595000 | 0.315862000  |
| H  | 5.694937000  | -1.358073000 | 0.600903000  |
| C  | 3.783493000  | -0.617599000 | 1.274052000  |
| H  | 4.080493000  | -0.515148000 | 2.313435000  |
| C  | 2.490707000  | -0.273013000 | 0.879971000  |
| C  | 1.493495000  | 0.331366000  | 1.856857000  |
| H  | 1.755713000  | 0.051840000  | 2.888548000  |
| H  | 1.577313000  | 1.423335000  | 1.794455000  |
| C  | -0.263696000 | -1.392763000 | 1.909812000  |
| H  | -0.547962000 | -1.462463000 | 2.970740000  |
| H  | 0.628934000  | -2.016771000 | 1.779360000  |
| C  | -1.371109000 | -1.957341000 | 1.032785000  |
| C  | -2.293481000 | -2.879495000 | 1.526556000  |
| H  | -2.265062000 | -3.170322000 | 2.572373000  |
| C  | -3.243592000 | -3.420434000 | 0.659293000  |
| H  | -3.968951000 | -4.142229000 | 1.022503000  |
| C  | -3.251000000 | -3.013851000 | -0.674096000 |
| H  | -3.974793000 | -3.404193000 | -1.381428000 |
| C  | -2.306719000 | -2.077259000 | -1.088148000 |
| C  | -0.875135000 | 0.992360000  | 1.958447000  |
| H  | -0.704340000 | 1.312215000  | 2.997456000  |
| H  | -1.864988000 | 0.521096000  | 1.931517000  |
| C  | -0.904079000 | 2.201058000  | 1.034842000  |
| C  | -1.218179000 | 3.473944000  | 1.510961000  |
| H  | -1.387163000 | 3.631313000  | 2.572008000  |
| C  | -1.316749000 | 4.532024000  | 0.606597000  |
| H  | -1.562538000 | 5.530338000  | 0.955845000  |
| C  | -1.091084000 | 4.287711000  | -0.747403000 |
| H  | -1.156842000 | 5.080364000  | -1.484926000 |
| C  | -0.767466000 | 2.991950000  | -1.142293000 |
| N  | 2.085346000  | -0.400112000 | -0.399569000 |

|   |              |              |              |
|---|--------------|--------------|--------------|
| N | 0.102799000  | -0.019636000 | 1.525938000  |
| N | -1.385574000 | -1.563633000 | -0.257140000 |
| N | -0.675138000 | 1.971762000  | -0.273899000 |
| O | 0.125267000  | 0.010927000  | -2.734168000 |
| O | -0.994292000 | 0.020109000  | -3.304332000 |
| H | -2.277537000 | -1.713949000 | -2.111179000 |
| H | -0.575577000 | 2.750429000  | -2.183334000 |

**'1a**

|    |              |              |              |
|----|--------------|--------------|--------------|
| Cu | 0.027681000  | -0.014310000 | -0.704570000 |
| C  | 2.958673000  | -0.828452000 | -1.324895000 |
| H  | 2.571356000  | -0.909751000 | -2.336355000 |
| C  | 4.274983000  | -1.161688000 | -1.015144000 |
| H  | 4.944094000  | -1.512836000 | -1.793245000 |
| C  | 4.697877000  | -1.039740000 | 0.308161000  |
| H  | 5.714026000  | -1.298854000 | 0.589800000  |
| C  | 3.796175000  | -0.583154000 | 1.270799000  |
| H  | 4.095646000  | -0.478073000 | 2.309182000  |
| C  | 2.498692000  | -0.254812000 | 0.879813000  |
| C  | 1.490660000  | 0.337465000  | 1.851328000  |
| H  | 1.740510000  | 0.053624000  | 2.884363000  |
| H  | 1.565318000  | 1.430332000  | 1.795460000  |
| C  | -0.251112000 | -1.402430000 | 1.894696000  |
| H  | -0.528609000 | -1.466425000 | 2.957265000  |
| H  | 0.646001000  | -2.019293000 | 1.761988000  |
| C  | -1.358458000 | -1.973065000 | 1.023246000  |
| C  | -2.271439000 | -2.906182000 | 1.512695000  |
| H  | -2.238106000 | -3.206493000 | 2.555670000  |
| C  | -3.219650000 | -3.445990000 | 0.642055000  |
| H  | -3.938403000 | -4.176731000 | 1.000536000  |
| C  | -3.234621000 | -3.027382000 | -0.687590000 |
| H  | -3.957994000 | -3.417195000 | -1.395623000 |
| C  | -2.299401000 | -2.079517000 | -1.097445000 |
| C  | -0.883933000 | 0.977283000  | 1.948835000  |
| H  | -0.708647000 | 1.287202000  | 2.989571000  |
| H  | -1.869298000 | 0.497068000  | 1.922155000  |
| C  | -0.924726000 | 2.190609000  | 1.033103000  |
| C  | -1.257186000 | 3.458399000  | 1.509347000  |
| H  | -1.432393000 | 3.614020000  | 2.569630000  |

|   |              |              |              |
|---|--------------|--------------|--------------|
| C | -1.366546000 | 4.514422000  | 0.603303000  |
| H | -1.626785000 | 5.509489000  | 0.951367000  |
| C | -1.133985000 | 4.273348000  | -0.750228000 |
| H | -1.209145000 | 5.065366000  | -1.487506000 |
| C | -0.791440000 | 2.982290000  | -1.145229000 |
| N | 2.093160000  | -0.386296000 | -0.398670000 |
| N | 0.103484000  | -0.024695000 | 1.503529000  |
| N | -1.380454000 | -1.568737000 | -0.262690000 |
| N | -0.688325000 | 1.965706000  | -0.274434000 |
| O | 0.139929000  | 0.020015000  | -2.679392000 |
| O | -1.008162000 | 0.019435000  | -3.227683000 |
| H | -2.273080000 | -1.702363000 | -2.115434000 |
| H | -0.593839000 | 2.740039000  | -2.184936000 |

**<sup>3</sup>2a**

|    |              |              |              |
|----|--------------|--------------|--------------|
| Cu | -0.064526000 | 0.023364000  | 0.622260000  |
| C  | -0.084974000 | 3.035434000  | 1.385879000  |
| H  | -0.181842000 | 2.635592000  | 2.390883000  |
| C  | -0.110297000 | 4.405582000  | 1.139293000  |
| H  | -0.224288000 | 5.103476000  | 1.961740000  |
| C  | 0.005226000  | 4.845734000  | -0.178934000 |
| H  | -0.018745000 | 5.905953000  | -0.412190000 |
| C  | 0.146504000  | 3.904122000  | -1.198940000 |
| H  | 0.235016000  | 4.215062000  | -2.235508000 |
| C  | 0.177871000  | 2.549004000  | -0.871064000 |
| C  | 0.415844000  | 1.474297000  | -1.918767000 |
| H  | 0.104924000  | 1.831335000  | -2.911756000 |
| H  | 1.494233000  | 1.282192000  | -1.973790000 |
| C  | -1.683668000 | 0.193336000  | -1.844041000 |
| H  | -1.892331000 | -0.004694000 | -2.906255000 |
| H  | -2.065497000 | 1.198269000  | -1.625695000 |
| C  | -2.424688000 | -0.802613000 | -0.966939000 |
| C  | -3.580776000 | -1.447571000 | -1.405164000 |
| H  | -3.946227000 | -1.282996000 | -2.414294000 |
| C  | -4.255225000 | -2.298653000 | -0.528829000 |
| H  | -5.158902000 | -2.809148000 | -0.847926000 |
| C  | -3.747445000 | -2.487994000 | 0.755827000  |
| H  | -4.237285000 | -3.144048000 | 1.467307000  |
| C  | -2.579963000 | -1.818089000 | 1.114061000  |



|            |              |              |              |
|------------|--------------|--------------|--------------|
| H          | -2.136110000 | -1.938014000 | 2.097867000  |
| C          | 0.463284000  | -0.980908000 | -2.099268000 |
| H          | 0.673106000  | -0.876822000 | -3.173746000 |
| H          | -0.213769000 | -1.835450000 | -1.984286000 |
| C          | 1.743199000  | -1.275564000 | -1.340253000 |
| C          | 2.877612000  | -1.707548000 | -2.005630000 |
| H          | 2.884985000  | -1.789743000 | -3.087037000 |
| C          | 4.008388000  | -2.044092000 | -1.242272000 |
| H          | 4.915006000  | -2.390206000 | -1.729598000 |
| C          | 3.958776000  | -1.938456000 | 0.130914000  |
| H          | 4.812729000  | -2.198592000 | 0.748294000  |
| C          | 2.766485000  | -1.479418000 | 0.743699000  |
| N          | 0.057558000  | 2.130107000  | 0.404634000  |
| N          | -0.237150000 | 0.201866000  | -1.563753000 |
| N          | -1.934963000 | -0.992994000 | 0.274419000  |
| N          | 1.683225000  | -1.141076000 | 0.009090000  |
| N          | 2.693857000  | -1.331048000 | 2.097415000  |
| H          | 1.781158000  | -1.310823000 | 2.535351000  |
| O          | -0.201896000 | 0.157638000  | 2.623349000  |
| O          | -0.148219000 | -0.952767000 | 3.230225000  |
| H          | 3.431405000  | -1.735492000 | 2.656454000  |
| <b>!2a</b> |              |              |              |
| Cu         | -0.065924000 | 0.006579000  | 0.624237000  |
| C          | -0.137000000 | 3.022282000  | 1.396020000  |
| H          | -0.223771000 | 2.619209000  | 2.400899000  |
| C          | -0.191113000 | 4.392731000  | 1.155626000  |
| H          | -0.318457000 | 5.084851000  | 1.981015000  |
| C          | -0.086502000 | 4.839978000  | -0.161043000 |
| H          | -0.132787000 | 5.900242000  | -0.390685000 |
| C          | 0.073121000  | 3.904581000  | -1.183780000 |
| H          | 0.154153000  | 4.220662000  | -2.219434000 |
| C          | 0.132996000  | 2.548776000  | -0.861373000 |
| C          | 0.393182000  | 1.486677000  | -1.917590000 |
| H          | 0.083029000  | 1.850873000  | -2.908563000 |
| H          | 1.475048000  | 1.313705000  | -1.968414000 |
| C          | -1.683670000 | 0.168568000  | -1.857715000 |
| H          | -1.893515000 | -0.038112000 | -2.918377000 |
| H          | -2.081715000 | 1.168143000  | -1.643602000 |
| C          | -2.410702000 | -0.833342000 | -0.974984000 |

|   |              |              |              |
|---|--------------|--------------|--------------|
| C | -3.559591000 | -1.493490000 | -1.410026000 |
| H | -3.926204000 | -1.337149000 | -2.420046000 |
| C | -4.225254000 | -2.348344000 | -0.530846000 |
| H | -5.122929000 | -2.870227000 | -0.848471000 |
| C | -3.716460000 | -2.526449000 | 0.755012000  |
| H | -4.199519000 | -3.184443000 | 1.469332000  |
| C | -2.556423000 | -1.842355000 | 1.110450000  |
| H | -2.111808000 | -1.952495000 | 2.095607000  |
| C | 0.484473000  | -0.967634000 | -2.108183000 |
| H | 0.698766000  | -0.864702000 | -3.182265000 |
| H | -0.177308000 | -1.834353000 | -1.994318000 |
| C | 1.767581000  | -1.239022000 | -1.344341000 |
| C | 2.910862000  | -1.649294000 | -2.008873000 |
| H | 2.920125000  | -1.730558000 | -3.090344000 |
| C | 4.047689000  | -1.964190000 | -1.245979000 |
| H | 4.960635000  | -2.293472000 | -1.733137000 |
| C | 3.996004000  | -1.858105000 | 0.127205000  |
| H | 4.854946000  | -2.101229000 | 0.744647000  |
| C | 2.795647000  | -1.420778000 | 0.739507000  |
| N | 0.022588000  | 2.122521000  | 0.412921000  |
| N | -0.239344000 | 0.201761000  | -1.579716000 |
| N | -1.919853000 | -1.014264000 | 0.267602000  |
| N | 1.705251000  | -1.106006000 | 0.005354000  |
| N | 2.726648000  | -1.269295000 | 2.094574000  |
| H | 1.819391000  | -1.269230000 | 2.542835000  |
| O | -0.158576000 | 0.1111707000 | 2.629430000  |
| O | -0.168711000 | -0.996587000 | 3.227179000  |
| H | 3.475927000  | -1.659984000 | 2.647914000  |

**<sup>3</sup>a**

|    |              |             |              |
|----|--------------|-------------|--------------|
| Cu | -0.009463000 | 0.088869000 | 0.550146000  |
| C  | 1.822902000  | 2.594010000 | 1.194653000  |
| H  | 1.523199000  | 2.394473000 | 2.218021000  |
| C  | 2.627572000  | 3.684396000 | 0.874073000  |
| H  | 2.965565000  | 4.357389000 | 1.654685000  |
| C  | 2.973927000  | 3.886359000 | -0.461512000 |
| H  | 3.592615000  | 4.730222000 | -0.751622000 |
| C  | 2.510098000  | 2.989678000 | -1.424459000 |

|   |              |              |              |
|---|--------------|--------------|--------------|
| H | 2.760385000  | 3.118404000  | -2.473124000 |
| C | 1.719167000  | 1.914050000  | -1.021773000 |
| C | 1.250728000  | 0.852548000  | -2.000101000 |
| H | 1.193617000  | 1.263394000  | -3.018655000 |
| H | 1.994722000  | 0.047561000  | -2.020348000 |
| C | -1.187099000 | 1.129303000  | -1.880226000 |
| H | -1.433726000 | 1.121303000  | -2.951872000 |
| H | -0.890962000 | 2.153588000  | -1.623185000 |
| C | -2.400149000 | 0.741891000  | -1.058805000 |
| C | -3.675921000 | 0.846115000  | -1.582687000 |
| H | -3.827648000 | 1.169842000  | -2.606522000 |
| C | -4.762486000 | 0.525467000  | -0.750976000 |
| H | -5.779131000 | 0.602457000  | -1.124748000 |
| C | -4.531527000 | 0.108374000  | 0.541295000  |
| H | -5.350032000 | -0.150009000 | 1.205555000  |
| C | -3.196593000 | 0.007664000  | 1.008282000  |
| C | -0.214191000 | -1.122571000 | -2.083844000 |
| H | -0.019280000 | -1.188672000 | -3.163877000 |
| H | -1.266881000 | -1.385213000 | -1.929983000 |
| C | 0.653456000  | -2.112106000 | -1.330763000 |
| C | 1.143211000  | -3.238179000 | -1.968169000 |
| H | 0.959256000  | -3.397359000 | -3.025086000 |
| C | 1.868103000  | -4.169835000 | -1.205877000 |
| H | 2.258543000  | -5.071133000 | -1.668993000 |
| C | 2.091753000  | -3.927638000 | 0.131052000  |
| H | 2.656286000  | -4.622896000 | 0.744187000  |
| C | 1.586307000  | -2.736730000 | 0.712711000  |
| N | 1.378221000  | 1.728852000  | 0.268872000  |
| N | -0.033361000 | 0.255546000  | -1.586729000 |
| N | -2.150529000 | 0.326783000  | 0.209932000  |
| N | 0.862278000  | -1.851981000 | -0.014165000 |
| N | 1.801782000  | -2.469766000 | 2.025333000  |
| H | 1.619216000  | -1.546542000 | 2.403005000  |
| O | -0.131859000 | 0.276011000  | 2.523234000  |
| O | 0.944378000  | 0.110749000  | 3.193469000  |
| H | 2.439269000  | -3.054295000 | 2.544514000  |
| N | -2.938276000 | -0.451541000 | 2.262745000  |
| H | -2.028012000 | -0.281321000 | 2.671783000  |
| H | -3.709078000 | -0.534487000 | 2.909259000  |

**13a**

|    |              |              |              |
|----|--------------|--------------|--------------|
| Cu | -0.026563000 | 0.086297000  | 0.539238000  |
| C  | 1.632771000  | 2.698683000  | 1.182995000  |
| H  | 1.342330000  | 2.480976000  | 2.205367000  |
| C  | 2.368937000  | 3.835749000  | 0.859358000  |
| H  | 2.662855000  | 4.531299000  | 1.637980000  |
| C  | 2.705487000  | 4.054477000  | -0.476182000 |
| H  | 3.270788000  | 4.934707000  | -0.767146000 |
| C  | 2.303033000  | 3.127522000  | -1.438515000 |
| H  | 2.549124000  | 3.268337000  | -2.486579000 |
| C  | 1.580511000  | 2.006155000  | -1.033336000 |
| C  | 1.183501000  | 0.907897000  | -2.001344000 |
| H  | 1.091370000  | 1.302105000  | -3.023280000 |
| H  | 1.978967000  | 0.154121000  | -2.017319000 |
| C  | -1.268653000 | 1.022348000  | -1.889943000 |
| H  | -1.505556000 | 0.977298000  | -2.962364000 |
| H  | -1.040911000 | 2.067996000  | -1.650399000 |
| C  | -2.454758000 | 0.570349000  | -1.064433000 |
| C  | -3.735946000 | 0.589886000  | -1.583043000 |
| H  | -3.912466000 | 0.888592000  | -2.610450000 |
| C  | -4.796936000 | 0.217831000  | -0.738441000 |
| H  | -5.818322000 | 0.227393000  | -1.106992000 |
| C  | -4.535275000 | -0.161333000 | 0.559064000  |
| H  | -5.333929000 | -0.454500000 | 1.232962000  |
| C  | -3.194190000 | -0.174502000 | 1.022228000  |
| C  | -0.147884000 | -1.163121000 | -2.066111000 |
| H  | 0.042208000  | -1.216786000 | -3.147275000 |
| H  | -1.178526000 | -1.496694000 | -1.901777000 |
| C  | 0.796545000  | -2.079123000 | -1.314501000 |
| C  | 1.356182000  | -3.178230000 | -1.939461000 |
| H  | 1.168914000  | -3.371966000 | -2.989979000 |
| C  | 2.158124000  | -4.039587000 | -1.169711000 |
| H  | 2.604276000  | -4.920709000 | -1.621206000 |
| C  | 2.386332000  | -3.753703000 | 0.157079000  |
| H  | 3.010296000  | -4.393240000 | 0.773226000  |
| C  | 1.807400000  | -2.588506000 | 0.726078000  |
| N  | 1.247114000  | 1.806370000  | 0.256840000  |
| N  | -0.059639000 | 0.229739000  | -1.576501000 |
| N  | -2.173704000 | 0.189894000  | 0.208500000  |

|   |              |              |              |
|---|--------------|--------------|--------------|
| N | 1.005172000  | -1.777525000 | -0.006894000 |
| N | 2.036389000  | -2.268916000 | 2.020193000  |
| H | 1.752593000  | -1.369697000 | 2.401723000  |
| O | -0.167430000 | 0.246428000  | 2.485306000  |
| O | 0.931874000  | 0.163019000  | 3.162254000  |
| H | 2.693674000  | -2.814624000 | 2.556031000  |
| N | -2.902841000 | -0.587174000 | 2.282700000  |
| H | -1.997758000 | -0.362010000 | 2.680894000  |
| H | -3.663672000 | -0.714255000 | 2.933638000  |

**<sup>3</sup>4a**

|    |             |              |              |
|----|-------------|--------------|--------------|
| Cu | 0.829764000 | 0.027513000  | -0.441331000 |
| C  | 0.866289000 | 2.981859000  | -1.391416000 |
| H  | 0.467421000 | 2.548346000  | -2.303796000 |
| C  | 1.156134000 | 4.340384000  | -1.294495000 |
| H  | 0.981729000 | 4.994762000  | -2.141740000 |
| C  | 1.678418000 | 4.824720000  | -0.095503000 |
| H  | 1.925437000 | 5.876230000  | 0.015457000  |
| C  | 1.886796000 | 3.937845000  | 0.961625000  |
| H  | 2.295588000 | 4.283349000  | 1.906331000  |
| C  | 1.558598000 | 2.593096000  | 0.792757000  |
| C  | 1.679545000 | 1.588401000  | 1.927100000  |
| H  | 2.424078000 | 1.929021000  | 2.661996000  |
| H  | 0.715459000 | 1.543814000  | 2.447920000  |
| C  | 3.382503000 | 0.042038000  | 1.048395000  |
| H  | 4.024374000 | -0.146443000 | 1.922149000  |
| H  | 3.727008000 | 0.980390000  | 0.596714000  |
| C  | 3.542472000 | -1.072235000 | 0.026530000  |
| C  | 4.695678000 | -1.853883000 | -0.032214000 |
| H  | 5.490067000 | -1.707806000 | 0.693482000  |
| C  | 4.810322000 | -2.818063000 | -1.034654000 |
| H  | 5.700422000 | -3.436437000 | -1.100653000 |
| C  | 3.763956000 | -2.979107000 | -1.941832000 |
| H  | 3.809076000 | -3.719509000 | -2.733222000 |
| C  | 2.639279000 | -2.168007000 | -1.809476000 |
| H  | 1.792582000 | -2.260210000 | -2.482867000 |
| C  | 1.471015000 | -0.833362000 | 2.320976000  |
| H  | 1.753806000 | -0.658609000 | 3.369603000  |
| H  | 1.955594000 | -1.767153000 | 2.012242000  |

|           |              |              |              |
|-----------|--------------|--------------|--------------|
| C         | -0.032574000 | -1.018021000 | 2.210472000  |
| C         | -0.781666000 | -1.401693000 | 3.315123000  |
| H         | -0.312625000 | -1.510354000 | 4.287289000  |
| C         | -2.141694000 | -1.675148000 | 3.131850000  |
| H         | -2.749677000 | -2.018229000 | 3.963600000  |
| C         | -2.703966000 | -1.533803000 | 1.874424000  |
| H         | -3.738541000 | -1.794216000 | 1.692062000  |
| C         | -1.899182000 | -1.078237000 | 0.812919000  |
| C         | -3.689772000 | -0.802345000 | -1.001404000 |
| N         | 1.061197000  | 2.130079000  | -0.371795000 |
| N         | 1.972976000  | 0.231096000  | 1.435043000  |
| N         | 2.531547000  | -1.234776000 | -0.850433000 |
| N         | -0.579070000 | -0.842145000 | 0.986381000  |
| N         | -2.373738000 | -0.912459000 | -0.478133000 |
| H         | -1.731762000 | -1.226348000 | -1.210296000 |
| O         | -3.907506000 | -1.376505000 | -2.051079000 |
| C         | -4.746430000 | 0.151653000  | -0.390005000 |
| C         | -5.237994000 | 1.015249000  | -1.581760000 |
| H         | -5.602427000 | 0.385862000  | -2.395441000 |
| H         | -6.048436000 | 1.671009000  | -1.246171000 |
| H         | -4.430904000 | 1.646211000  | -1.972328000 |
| C         | -4.229851000 | 1.103627000  | 0.704403000  |
| H         | -4.008729000 | 0.602696000  | 1.649924000  |
| H         | -3.330348000 | 1.638468000  | 0.378360000  |
| H         | -5.000904000 | 1.853014000  | 0.913157000  |
| C         | -5.937668000 | -0.690477000 | 0.122226000  |
| H         | -6.298422000 | -1.362466000 | -0.661794000 |
| H         | -5.679788000 | -1.296087000 | 0.999127000  |
| H         | -6.759375000 | -0.027601000 | 0.414219000  |
| O         | 0.094618000  | 0.026841000  | -2.314412000 |
| O         | -0.450300000 | -1.068972000 | -2.632059000 |
| <b>4a</b> |              |              |              |
| Cu        | -0.840914000 | 0.023094000  | 0.446976000  |
| C         | -0.838693000 | 2.961445000  | 1.423434000  |
| H         | -0.448518000 | 2.507817000  | 2.329759000  |
| C         | -1.109940000 | 4.324870000  | 1.341120000  |
| H         | -0.928413000 | 4.967219000  | 2.196006000  |
| C         | -1.623585000 | 4.830232000  | 0.146893000  |
| H         | -1.855843000 | 5.886349000  | 0.048482000  |

|   |              |              |              |
|---|--------------|--------------|--------------|
| C | -1.843005000 | 3.959904000  | -0.922062000 |
| H | -2.245456000 | 4.322881000  | -1.862902000 |
| C | -1.533285000 | 2.609306000  | -0.767938000 |
| C | -1.662728000 | 1.614002000  | -1.908185000 |
| H | -2.411449000 | 1.956983000  | -2.637057000 |
| H | -0.701958000 | 1.568597000  | -2.434744000 |
| C | -3.375185000 | 0.068507000  | -1.046806000 |
| H | -4.008131000 | -0.101248000 | -1.930317000 |
| H | -3.715818000 | 1.002625000  | -0.583717000 |
| C | -3.547685000 | -1.060467000 | -0.044662000 |
| C | -4.706286000 | -1.834005000 | 0.003996000  |
| H | -5.501024000 | -1.672046000 | -0.717883000 |
| C | -4.825260000 | -2.811413000 | 0.993489000  |
| H | -5.719603000 | -3.424359000 | 1.052429000  |
| C | -3.778925000 | -2.992664000 | 1.896866000  |
| H | -3.828892000 | -3.743579000 | 2.677949000  |
| C | -2.647818000 | -2.188497000 | 1.775247000  |
| H | -1.799151000 | -2.292308000 | 2.444520000  |
| C | -1.465318000 | -0.804525000 | -2.323534000 |
| H | -1.761029000 | -0.616292000 | -3.365808000 |
| H | -1.945952000 | -1.741284000 | -2.018282000 |
| C | 0.038511000  | -0.983326000 | -2.227006000 |
| C | 0.788151000  | -1.324167000 | -3.344608000 |
| H | 0.318692000  | -1.406076000 | -4.319166000 |
| C | 2.151460000  | -1.590372000 | -3.171348000 |
| H | 2.761896000  | -1.899567000 | -4.014503000 |
| C | 2.712844000  | -1.487407000 | -1.910215000 |
| H | 3.749655000  | -1.745846000 | -1.737022000 |
| C | 1.904533000  | -1.077085000 | -0.832110000 |
| C | 3.699932000  | -0.867778000 | 0.981893000  |
| N | -1.044150000 | 2.127364000  | 0.391657000  |
| N | -1.958669000 | 0.252808000  | -1.420161000 |
| N | -2.537157000 | -1.243682000 | 0.828372000  |
| N | 0.583492000  | -0.842695000 | -0.997653000 |
| N | 2.379703000  | -0.959599000 | 0.463319000  |
| H | 1.744065000  | -1.314384000 | 1.178905000  |
| O | 3.934362000  | -1.498831000 | 1.993988000  |
| C | 4.738143000  | 0.133919000  | 0.417419000  |
| C | 5.204238000  | 0.954888000  | 1.648982000  |

|   |              |              |              |
|---|--------------|--------------|--------------|
| H | 5.579165000  | 0.298065000  | 2.435844000  |
| H | 6.001108000  | 1.642931000  | 1.347096000  |
| H | 4.380963000  | 1.549284000  | 2.062423000  |
| C | 4.207660000  | 1.121107000  | -0.638079000 |
| H | 3.996667000  | 0.655291000  | -1.603783000 |
| H | 3.299027000  | 1.627458000  | -0.292531000 |
| H | 4.966671000  | 1.890873000  | -0.814608000 |
| C | 5.948778000  | -0.660154000 | -0.124596000 |
| H | 6.317088000  | -1.361904000 | 0.629163000  |
| H | 5.707464000  | -1.227527000 | -1.031477000 |
| H | 6.759574000  | 0.031254000  | -0.378520000 |
| O | -0.112173000 | 0.027084000  | 2.279954000  |
| O | 0.314553000  | -1.121780000 | 2.639754000  |

**<sup>3</sup>5a**

|    |              |              |              |
|----|--------------|--------------|--------------|
| Cu | 0.040605000  | 0.796187000  | 0.212760000  |
| C  | 0.726192000  | 1.950236000  | 3.021681000  |
| H  | 0.372613000  | 0.979711000  | 3.356664000  |
| C  | 1.135046000  | 2.931473000  | 3.921049000  |
| H  | 1.105490000  | 2.736605000  | 4.987606000  |
| C  | 1.569701000  | 4.157066000  | 3.416401000  |
| H  | 1.888221000  | 4.949246000  | 4.087215000  |
| C  | 1.585346000  | 4.356765000  | 2.035295000  |
| H  | 1.915133000  | 5.300630000  | 1.611960000  |
| C  | 1.172689000  | 3.321073000  | 1.198125000  |
| C  | 1.233959000  | 3.429292000  | -0.315126000 |
| H  | 1.169632000  | 4.481331000  | -0.629779000 |
| H  | 2.208230000  | 3.053948000  | -0.650116000 |
| C  | -1.143229000 | 3.217511000  | -0.885741000 |
| H  | -1.247543000 | 4.047990000  | -1.599262000 |
| H  | -1.250191000 | 3.641167000  | 0.120123000  |
| C  | -2.242507000 | 2.196828000  | -1.108990000 |
| C  | -3.397722000 | 2.548687000  | -1.790473000 |
| H  | -3.511519000 | 3.545123000  | -2.203522000 |
| C  | -4.394232000 | 1.577604000  | -1.948456000 |
| H  | -5.296911000 | 1.802172000  | -2.508639000 |
| C  | -4.205891000 | 0.315735000  | -1.418440000 |
| H  | -4.931452000 | -0.469773000 | -1.580774000 |
| C  | -3.022678000 | 0.037369000  | -0.700848000 |



|   |              |              |              |
|---|--------------|--------------|--------------|
| C | 0.556901000  | 2.188603000  | -2.330247000 |
| H | 0.908241000  | 3.039469000  | -2.931747000 |
| H | -0.356526000 | 1.814816000  | -2.806856000 |
| C | 1.594215000  | 1.082114000  | -2.333374000 |
| C | 2.540238000  | 1.009266000  | -3.346888000 |
| H | 2.582313000  | 1.774267000  | -4.114923000 |
| C | 3.406861000  | -0.088892000 | -3.367119000 |
| H | 4.129483000  | -0.204814000 | -4.169285000 |
| C | 3.319848000  | -1.042509000 | -2.368414000 |
| H | 3.939553000  | -1.929418000 | -2.387634000 |
| C | 2.381455000  | -0.869361000 | -1.332195000 |
| C | 3.084893000  | -2.816330000 | 0.179206000  |
| N | 0.746089000  | 2.142597000  | 1.693169000  |
| N | 0.195876000  | 2.604385000  | -0.962403000 |
| N | -2.045455000 | 0.968182000  | -0.573386000 |
| N | 1.514713000  | 0.170953000  | -1.336117000 |
| N | 2.241470000  | -1.773199000 | -0.294301000 |
| H | 1.275758000  | -1.954354000 | -0.014083000 |
| O | 2.537065000  | -3.850894000 | 0.505657000  |
| C | 4.593286000  | -2.598484000 | 0.460209000  |
| C | 4.799780000  | -3.088010000 | 1.918261000  |
| H | 4.458570000  | -4.118016000 | 2.035425000  |
| H | 5.863450000  | -3.032201000 | 2.173560000  |
| H | 4.246713000  | -2.461913000 | 2.628178000  |
| C | 5.081289000  | -1.140907000 | 0.375631000  |
| H | 5.113006000  | -0.749314000 | -0.643955000 |
| H | 4.457966000  | -0.473863000 | 0.982354000  |
| H | 6.101615000  | -1.086657000 | 0.770071000  |
| C | 5.412028000  | -3.516188000 | -0.476926000 |
| H | 5.052124000  | -4.547281000 | -0.415343000 |
| H | 5.365465000  | -3.199704000 | -1.525585000 |
| H | 6.465954000  | -3.499888000 | -0.178814000 |
| O | -0.101202000 | -0.652794000 | 1.568192000  |
| O | -0.285212000 | -1.806426000 | 1.066765000  |
| N | -2.763517000 | -1.198714000 | -0.151414000 |
| H | -1.778045000 | -1.456862000 | -0.096235000 |
| C | -3.568414000 | -2.366519000 | 0.018856000  |
| C | -4.953039000 | -2.323308000 | 0.709606000  |
| C | -6.035019000 | -2.761667000 | -0.304730000 |

|   |              |              |              |
|---|--------------|--------------|--------------|
| H | -5.761142000 | -3.711972000 | -0.772305000 |
| H | -6.990642000 | -2.895199000 | 0.213585000  |
| H | -6.197378000 | -2.024168000 | -1.099592000 |
| C | -5.314508000 | -0.980602000 | 1.370021000  |
| H | -4.520519000 | -0.640435000 | 2.044109000  |
| H | -5.522147000 | -0.181602000 | 0.654186000  |
| H | -6.220877000 | -1.114456000 | 1.970088000  |
| C | -4.872956000 | -3.400020000 | 1.824719000  |
| H | -4.121945000 | -3.135175000 | 2.577589000  |
| H | -5.844107000 | -3.475331000 | 2.325267000  |
| H | -4.609779000 | -4.374051000 | 1.408513000  |
| O | -3.040874000 | -3.424863000 | -0.258548000 |

**15a**

|    |              |              |              |
|----|--------------|--------------|--------------|
| Cu | 0.026617000  | 0.805494000  | 0.225622000  |
| C  | 0.816392000  | 2.011656000  | 2.982213000  |
| H  | 0.443613000  | 1.058865000  | 3.345751000  |
| C  | 1.282042000  | 3.000116000  | 3.845594000  |
| H  | 1.279842000  | 2.829884000  | 4.916752000  |
| C  | 1.737206000  | 4.200658000  | 3.300271000  |
| H  | 2.099831000  | 4.996944000  | 3.943266000  |
| C  | 1.716295000  | 4.370840000  | 1.915044000  |
| H  | 2.060841000  | 5.294893000  | 1.460919000  |
| C  | 1.247242000  | 3.329920000  | 1.115351000  |
| C  | 1.262100000  | 3.396467000  | -0.400489000 |
| H  | 1.204624000  | 4.439347000  | -0.744547000 |
| H  | 2.216938000  | 2.992509000  | -0.756962000 |
| C  | -1.135927000 | 3.221224000  | -0.886250000 |
| H  | -1.236038000 | 4.043780000  | -1.609275000 |
| H  | -1.205320000 | 3.662086000  | 0.115464000  |
| C  | -2.264193000 | 2.224963000  | -1.068340000 |
| C  | -3.448392000 | 2.608554000  | -1.679186000 |
| H  | -3.569114000 | 3.615350000  | -2.064272000 |
| C  | -4.466099000 | 1.654874000  | -1.804396000 |
| H  | -5.395350000 | 1.905723000  | -2.306983000 |
| C  | -4.265273000 | 0.375789000  | -1.321851000 |
| H  | -5.007573000 | -0.397218000 | -1.467683000 |
| C  | -3.047659000 | 0.062913000  | -0.680902000 |
| C  | 0.495005000  | 2.120709000  | -2.359901000 |
| H  | 0.834803000  | 2.954596000  | -2.990590000 |

|   |              |              |              |
|---|--------------|--------------|--------------|
| H | -0.437752000 | 1.746443000  | -2.796056000 |
| C | 1.521187000  | 1.004884000  | -2.367254000 |
| C | 2.436626000  | 0.898168000  | -3.405061000 |
| H | 2.461119000  | 1.641321000  | -4.194989000 |
| C | 3.296335000  | -0.205895000 | -3.418865000 |
| H | 3.994641000  | -0.349265000 | -4.237936000 |
| C | 3.233792000  | -1.129146000 | -2.390730000 |
| H | 3.848775000  | -2.019564000 | -2.401503000 |
| C | 2.326403000  | -0.921581000 | -1.332648000 |
| C | 3.077032000  | -2.824916000 | 0.206170000  |
| N | 0.801977000  | 2.176642000  | 1.650107000  |
| N | 0.186222000  | 2.572985000  | -0.989130000 |
| N | -2.057533000 | 0.982068000  | -0.572036000 |
| N | 1.463656000  | 0.122128000  | -1.342876000 |
| N | 2.216667000  | -1.793592000 | -0.265705000 |
| H | 1.260645000  | -1.966877000 | 0.047033000  |
| O | 2.544437000  | -3.856098000 | 0.565239000  |
| C | 4.590372000  | -2.591640000 | 0.445758000  |
| C | 4.830817000  | -3.034409000 | 1.913609000  |
| H | 4.497683000  | -4.061954000 | 2.069340000  |
| H | 5.899446000  | -2.965708000 | 2.144132000  |
| H | 4.289498000  | -2.389247000 | 2.615440000  |
| C | 5.069370000  | -1.135770000 | 0.303634000  |
| H | 5.074314000  | -0.777664000 | -0.728695000 |
| H | 4.457816000  | -0.452090000 | 0.903764000  |
| H | 6.098800000  | -1.065026000 | 0.671034000  |
| C | 5.391918000  | -3.534765000 | -0.480766000 |
| H | 5.035982000  | -4.564254000 | -0.381524000 |
| H | 5.322239000  | -3.248823000 | -1.536974000 |
| H | 6.451870000  | -3.507729000 | -0.205683000 |
| O | -0.162521000 | -0.542211000 | 1.641692000  |
| O | -0.306791000 | -1.750903000 | 1.244917000  |
| N | -2.765827000 | -1.195824000 | -0.199122000 |
| H | -1.782817000 | -1.456254000 | -0.217898000 |
| C | -3.564346000 | -2.367632000 | -0.023694000 |
| C | -4.906281000 | -2.344837000 | 0.746399000  |
| C | -6.046935000 | -2.739742000 | -0.220461000 |
| H | -5.808853000 | -3.675498000 | -0.734654000 |
| H | -6.973464000 | -2.883366000 | 0.345729000  |

|   |              |              |              |
|---|--------------|--------------|--------------|
| H | -6.245914000 | -1.974135000 | -0.979771000 |
| C | -5.221035000 | -1.025940000 | 1.475644000  |
| H | -4.387757000 | -0.714554000 | 2.115238000  |
| H | -5.464695000 | -0.200052000 | 0.802692000  |
| H | -6.092545000 | -1.178460000 | 2.121171000  |
| C | -4.768712000 | -3.462876000 | 1.814318000  |
| H | -3.974517000 | -3.228292000 | 2.531885000  |
| H | -5.710338000 | -3.553782000 | 2.365992000  |
| H | -4.534743000 | -4.421398000 | 1.347690000  |
| O | -3.058406000 | -3.415317000 | -0.371630000 |

<sup>3</sup>RC<sub>R1</sub>

|    |             |              |              |
|----|-------------|--------------|--------------|
| Cu | 2.352820000 | 0.118999000  | -0.323782000 |
| C  | 3.578308000 | 2.695883000  | -1.594221000 |
| H  | 2.987092000 | 2.383199000  | -2.449965000 |
| C  | 4.420440000 | 3.803423000  | -1.657054000 |
| H  | 4.497942000 | 4.376415000  | -2.574845000 |
| C  | 5.156764000 | 4.142509000  | -0.522550000 |
| H  | 5.831187000 | 4.993469000  | -0.533974000 |
| C  | 5.019280000 | 3.368539000  | 0.630331000  |
| H  | 5.579836000 | 3.605140000  | 1.529756000  |
| C  | 4.144780000 | 2.281825000  | 0.618030000  |
| C  | 3.885882000 | 1.451001000  | 1.865252000  |
| H  | 4.729651000 | 1.544943000  | 2.565871000  |
| H  | 3.005636000 | 1.863889000  | 2.372939000  |
| C  | 4.775945000 | -0.740517000 | 1.186694000  |
| H  | 5.306603000 | -1.116598000 | 2.074711000  |
| H  | 5.468607000 | -0.067250000 | 0.666749000  |
| C  | 4.442926000 | -1.892796000 | 0.250858000  |
| C  | 5.169352000 | -3.082911000 | 0.277295000  |
| H  | 5.955517000 | -3.223021000 | 1.013101000  |
| C  | 4.874131000 | -4.080550000 | -0.652606000 |
| H  | 5.429591000 | -5.013612000 | -0.650492000 |
| C  | 3.852811000 | -3.862177000 | -1.575612000 |
| H  | 3.585852000 | -4.611207000 | -2.313361000 |
| C  | 3.162443000 | -2.653050000 | -1.529374000 |
| C  | 2.725471000 | -0.610075000 | 2.544285000  |
| H  | 3.073610000 | -0.426994000 | 3.572198000  |

|   |              |              |              |
|---|--------------|--------------|--------------|
| H | 2.797132000  | -1.691193000 | 2.374209000  |
| C | 1.265871000  | -0.205471000 | 2.403117000  |
| C | 0.416345000  | -0.146174000 | 3.506754000  |
| H | 0.807417000  | -0.326819000 | 4.503685000  |
| C | -0.936177000 | 0.137291000  | 3.307805000  |
| H | -1.616453000 | 0.181167000  | 4.153130000  |
| C | -1.399552000 | 0.359412000  | 2.012289000  |
| H | -2.443186000 | 0.571000000  | 1.806356000  |
| C | -0.483566000 | 0.300133000  | 0.963543000  |
| N | 3.442870000  | 1.952384000  | -0.484631000 |
| N | 3.586323000  | 0.046375000  | 1.546473000  |
| N | 3.450771000  | -1.688787000 | -0.640339000 |
| N | 0.818110000  | 0.026317000  | 1.151802000  |
| O | 1.262801000  | 0.435585000  | -2.017503000 |
| O | 0.876718000  | -0.586301000 | -2.634884000 |
| H | 2.349051000  | -2.435661000 | -2.215171000 |
| H | -0.796126000 | 0.465109000  | -0.062110000 |
| C | -4.664374000 | -1.322812000 | 0.876449000  |
| C | -3.920401000 | -1.397887000 | -0.300479000 |
| C | -3.727375000 | -0.192495000 | -1.025591000 |
| C | -4.281161000 | 1.037465000  | -0.608070000 |
| C | -5.035321000 | 1.044337000  | 0.581710000  |
| C | -5.221400000 | -0.120311000 | 1.323098000  |
| H | -4.856238000 | -2.202820000 | 1.476153000  |
| H | -5.484043000 | 1.966211000  | 0.920931000  |
| O | -2.937574000 | -0.286449000 | -2.159316000 |
| H | -3.122623000 | 0.461279000  | -2.742116000 |
| C | -3.371278000 | -2.755538000 | -0.800645000 |
| C | -3.983450000 | -3.092936000 | -2.183116000 |
| C | -1.825921000 | -2.722053000 | -0.900094000 |
| C | -3.739188000 | -3.910385000 | 0.154733000  |
| H | -5.075831000 | -3.152479000 | -2.116115000 |
| H | -3.723275000 | -2.345536000 | -2.934052000 |
| H | -3.615904000 | -4.067882000 | -2.526359000 |
| H | -1.381317000 | -2.522117000 | 0.083195000  |
| H | -1.456662000 | -3.697875000 | -1.239912000 |
| H | -1.477014000 | -1.961963000 | -1.601207000 |
| H | -3.333108000 | -4.847087000 | -0.242658000 |
| H | -3.319499000 | -3.769573000 | 1.157697000  |

|   |              |              |              |
|---|--------------|--------------|--------------|
| H | -4.822929000 | -4.038579000 | 0.249778000  |
| C | -4.106602000 | 2.349025000  | -1.420481000 |
| C | -2.606858000 | 2.721759000  | -1.566187000 |
| C | -4.783611000 | 2.225697000  | -2.813184000 |
| C | -4.782507000 | 3.553906000  | -0.729614000 |
| H | -2.166336000 | 2.904166000  | -0.578788000 |
| H | -2.006366000 | 1.948544000  | -2.053492000 |
| H | -2.503531000 | 3.642094000  | -2.152939000 |
| H | -5.850860000 | 2.010044000  | -2.699297000 |
| H | -4.681842000 | 3.166575000  | -3.365976000 |
| H | -4.374799000 | 1.438391000  | -3.459115000 |
| H | -4.618478000 | 4.454166000  | -1.331589000 |
| H | -5.864769000 | 3.419322000  | -0.632208000 |
| H | -4.364898000 | 3.743103000  | 0.265343000  |
| O | -5.932649000 | -0.196771000 | 2.490370000  |
| C | -6.610813000 | 0.962830000  | 2.943370000  |
| H | -7.138961000 | 0.666727000  | 3.851466000  |
| H | -5.911782000 | 1.776680000  | 3.182554000  |
| H | -7.337722000 | 1.321745000  | 2.202726000  |

<sup>3</sup>RC<sub>R2</sub>

|    |             |              |              |
|----|-------------|--------------|--------------|
| Cu | 2.958624000 | -0.123877000 | -0.391932000 |
| C  | 3.657788000 | 2.676290000  | -1.633312000 |
| H  | 3.303286000 | 2.206172000  | -2.545913000 |
| C  | 4.179408000 | 3.967573000  | -1.633264000 |
| H  | 4.238044000 | 4.530484000  | -2.558626000 |
| C  | 4.625439000 | 4.503238000  | -0.425459000 |
| H  | 5.046746000 | 5.503264000  | -0.385645000 |
| C  | 4.528213000 | 3.733884000  | 0.734484000  |
| H  | 4.868713000 | 4.121216000  | 1.690035000  |
| C  | 3.980127000 | 2.453670000  | 0.654902000  |
| C  | 3.766859000 | 1.594577000  | 1.890478000  |
| H  | 4.460395000 | 1.895157000  | 2.689931000  |
| H  | 2.752706000 | 1.776144000  | 2.265688000  |
| C  | 5.262268000 | -0.306577000 | 1.459361000  |
| H  | 5.719138000 | -0.502858000 | 2.441137000  |
| H  | 5.837676000 | 0.504826000  | 0.996716000  |
| C  | 5.372255000 | -1.535428000 | 0.573017000  |
| C  | 6.369630000 | -2.490102000 | 0.768316000  |

|   |              |              |              |
|---|--------------|--------------|--------------|
| H | 7.059231000  | -2.392480000 | 1.601347000  |
| C | 6.466507000  | -3.561731000 | -0.119849000 |
| H | 7.237220000  | -4.315201000 | 0.012242000  |
| C | 5.555400000  | -3.651986000 | -1.170815000 |
| H | 5.590153000  | -4.470136000 | -1.882152000 |
| C | 4.578782000  | -2.666082000 | -1.291400000 |
| H | 3.838273000  | -2.688715000 | -2.084817000 |
| C | 3.054374000  | -0.690963000 | 2.476660000  |
| H | 3.248492000  | -0.471825000 | 3.536885000  |
| H | 3.361995000  | -1.728569000 | 2.300178000  |
| C | 1.572301000  | -0.563014000 | 2.177334000  |
| C | 0.640549000  | -0.588990000 | 3.198266000  |
| H | 0.957670000  | -0.649646000 | 4.233739000  |
| C | -0.723382000 | -0.542102000 | 2.853211000  |
| H | -1.483807000 | -0.561564000 | 3.628429000  |
| C | -1.092197000 | -0.463094000 | 1.529925000  |
| H | -2.134061000 | -0.417796000 | 1.230970000  |
| C | -0.080036000 | -0.423401000 | 0.532212000  |
| N | 3.559708000  | 1.937355000  | -0.516970000 |
| N | 3.871032000  | 0.156861000  | 1.586147000  |
| N | 4.489730000  | -1.629597000 | -0.442522000 |
| N | 1.232604000  | -0.473017000 | 0.865034000  |
| N | -0.415574000 | -0.350219000 | -0.777038000 |
| H | 0.305642000  | -0.211282000 | -1.470210000 |
| O | 2.253799000  | -0.123653000 | -2.288965000 |
| O | 2.303539000  | -1.212268000 | -2.933649000 |
| H | -1.381979000 | -0.179925000 | -1.049381000 |
| C | -6.327376000 | 0.224549000  | 1.123544000  |
| C | -5.664741000 | 1.380229000  | 0.702809000  |
| C | -4.669165000 | 1.345228000  | -0.273652000 |
| C | -4.327041000 | 0.072497000  | -0.796954000 |
| C | -4.999595000 | -1.111724000 | -0.424473000 |
| C | -6.009566000 | -1.003100000 | 0.548098000  |
| H | -5.975506000 | 2.312118000  | 1.155424000  |
| H | -6.547693000 | -1.886547000 | 0.856330000  |
| H | -3.415044000 | -0.674021000 | -2.341064000 |
| O | -3.255974000 | 0.035261000  | -1.700941000 |
| C | -4.702308000 | -2.494252000 | -1.068705000 |
| C | -5.031102000 | -2.469400000 | -2.586461000 |

|   |              |              |              |
|---|--------------|--------------|--------------|
| C | -3.234337000 | -2.930627000 | -0.833321000 |
| C | -5.584954000 | -3.612280000 | -0.469067000 |
| H | -6.078596000 | -2.195582000 | -2.748196000 |
| H | -4.429272000 | -1.769687000 | -3.182886000 |
| H | -4.864968000 | -3.460469000 | -3.023545000 |
| H | -3.020758000 | -2.988488000 | 0.239974000  |
| H | -3.067327000 | -3.926124000 | -1.261272000 |
| H | -2.499782000 | -2.255704000 | -1.277648000 |
| H | -5.337035000 | -4.563762000 | -0.951463000 |
| H | -5.414920000 | -3.735594000 | 0.605873000  |
| H | -6.652035000 | -3.430500000 | -0.634036000 |
| C | -4.033783000 | 2.664127000  | -0.781436000 |
| C | -2.513895000 | 2.709105000  | -0.495185000 |
| C | -4.288094000 | 2.817427000  | -2.301769000 |
| C | -4.654513000 | 3.898558000  | -0.091595000 |
| H | -2.311183000 | 2.558632000  | 0.572271000  |
| H | -1.965423000 | 1.956301000  | -1.062804000 |
| H | -2.114516000 | 3.691717000  | -0.775317000 |
| H | -5.363168000 | 2.834552000  | -2.513816000 |
| H | -3.862087000 | 3.763349000  | -2.658007000 |
| H | -3.836585000 | 2.004331000  | -2.873081000 |
| H | -4.194217000 | 4.804864000  | -0.499832000 |
| H | -5.732913000 | 3.970947000  | -0.267564000 |
| H | -4.480101000 | 3.901067000  | 0.990310000  |
| O | -7.276408000 | 0.409724000  | 2.087613000  |
| C | -8.027330000 | -0.711925000 | 2.523623000  |
| H | -7.385327000 | -1.476268000 | 2.982258000  |
| H | -8.724563000 | -0.332630000 | 3.272567000  |
| H | -8.593677000 | -1.164552000 | 1.698842000  |

<sup>3</sup>RC<sub>R3</sub>

|    |              |              |              |
|----|--------------|--------------|--------------|
| Cu | -2.860065000 | 0.106838000  | -0.427402000 |
| C  | -2.556980000 | -2.050375000 | -2.736844000 |
| H  | -2.039279000 | -1.246635000 | -3.249723000 |
| C  | -2.771239000 | -3.282396000 | -3.349721000 |
| H  | -2.423088000 | -3.452330000 | -4.362861000 |
| C  | -3.442738000 | -4.273534000 | -2.634770000 |
| H  | -3.636083000 | -5.244157000 | -3.081542000 |
| C  | -3.868052000 | -3.999832000 | -1.334684000 |



|   |              |              |              |
|---|--------------|--------------|--------------|
| H | -4.393690000 | -4.748987000 | -0.750315000 |
| C | -3.604278000 | -2.744798000 | -0.786518000 |
| C | -3.960730000 | -2.407016000 | 0.649628000  |
| H | -4.804952000 | -3.022594000 | 0.993282000  |
| H | -3.103496000 | -2.654650000 | 1.286436000  |
| C | -5.575767000 | -0.587187000 | 0.332363000  |
| H | -6.363304000 | -0.901483000 | 1.032916000  |
| H | -5.744109000 | -1.127383000 | -0.607271000 |
| C | -5.671925000 | 0.902372000  | 0.070112000  |
| C | -6.851027000 | 1.587403000  | 0.303669000  |
| H | -7.712897000 | 1.076278000  | 0.718367000  |
| C | -6.897370000 | 2.955194000  | -0.014282000 |
| H | -7.807611000 | 3.524722000  | 0.148036000  |
| C | -5.778851000 | 3.572350000  | -0.529649000 |
| H | -5.782060000 | 4.628322000  | -0.780595000 |
| C | -4.598088000 | 2.812967000  | -0.727249000 |
| C | -3.960501000 | -0.485707000 | 2.188529000  |
| H | -4.452866000 | -1.114471000 | 2.944375000  |
| H | -4.396117000 | 0.516660000  | 2.269448000  |
| C | -2.471513000 | -0.402283000 | 2.461082000  |
| C | -1.978601000 | -0.639417000 | 3.730625000  |
| H | -2.644107000 | -0.935847000 | 4.534089000  |
| C | -0.598183000 | -0.475546000 | 3.947684000  |
| H | -0.175389000 | -0.647633000 | 4.933194000  |
| C | 0.216697000  | -0.111796000 | 2.901108000  |
| H | 1.288233000  | 0.001275000  | 3.025225000  |
| C | -0.352320000 | 0.090441000  | 1.614182000  |
| N | -2.965125000 | -1.786193000 | -1.485359000 |
| N | -4.237007000 | -0.968752000 | 0.820780000  |
| N | -4.556908000 | 1.492307000  | -0.431455000 |
| N | -1.687114000 | -0.041550000 | 1.411183000  |
| N | 0.438245000  | 0.439944000  | 0.572817000  |
| H | 0.081127000  | 0.396587000  | -0.374204000 |
| O | -1.853366000 | 1.084334000  | -1.833911000 |
| O | -0.720008000 | 0.610953000  | -2.184860000 |
| H | 1.449934000  | 0.409600000  | 0.685496000  |
| N | -3.464636000 | 3.410793000  | -1.185501000 |
| H | -2.719724000 | 2.835160000  | -1.558234000 |
| H | -3.536732000 | 4.345046000  | -1.560651000 |

|   |             |              |              |
|---|-------------|--------------|--------------|
| C | 5.084617000 | -0.883049000 | 0.396931000  |
| C | 6.216626000 | -1.098577000 | -0.406853000 |
| C | 6.796524000 | -0.061505000 | -1.133138000 |
| C | 6.252862000 | 1.222394000  | -1.061235000 |
| C | 5.119775000 | 1.499377000  | -0.295443000 |
| C | 4.544181000 | 0.418020000  | 0.419613000  |
| H | 6.653611000 | -2.084638000 | -0.451563000 |
| H | 6.750646000 | 1.993476000  | -1.633022000 |
| O | 3.378073000 | 0.617905000  | 1.176319000  |
| H | 3.387829000 | 1.531726000  | 1.496911000  |
| C | 4.497477000 | -2.052346000 | 1.226368000  |
| C | 4.495416000 | -1.695475000 | 2.733396000  |
| C | 3.065382000 | -2.391102000 | 0.747541000  |
| C | 5.328669000 | -3.345851000 | 1.078304000  |
| H | 5.516912000 | -1.512934000 | 3.086263000  |
| H | 3.900317000 | -0.805088000 | 2.942337000  |
| H | 4.085459000 | -2.530316000 | 3.315288000  |
| H | 3.069354000 | -2.668737000 | -0.313188000 |
| H | 2.671070000 | -3.242644000 | 1.316241000  |
| H | 2.376162000 | -1.555713000 | 0.875889000  |
| H | 4.882739000 | -4.130114000 | 1.699847000  |
| H | 5.341506000 | -3.716103000 | 0.046946000  |
| H | 6.363401000 | -3.213080000 | 1.412678000  |
| C | 4.564226000 | 2.948139000  | -0.239644000 |
| C | 3.099576000 | 3.012151000  | -0.744002000 |
| C | 4.678260000 | 3.529733000  | 1.196045000  |
| C | 5.374278000 | 3.904860000  | -1.143332000 |
| H | 3.033004000 | 2.625401000  | -1.766894000 |
| H | 2.399318000 | 2.441119000  | -0.129620000 |
| H | 2.754525000 | 4.052924000  | -0.754243000 |
| H | 5.717187000 | 3.502550000  | 1.540030000  |
| H | 4.341510000 | 4.572538000  | 1.205841000  |
| H | 4.080303000 | 3.013055000  | 1.960636000  |
| H | 4.944061000 | 4.910204000  | -1.080038000 |
| H | 6.422239000 | 3.976178000  | -0.834970000 |
| H | 5.343049000 | 3.597400000  | -2.193619000 |
| O | 7.895419000 | -0.188828000 | -1.933714000 |
| C | 8.513732000 | -1.461159000 | -2.037346000 |
| H | 7.827619000 | -2.212020000 | -2.451949000 |

|   |             |              |              |
|---|-------------|--------------|--------------|
| H | 9.356402000 | -1.329632000 | -2.718260000 |
| H | 8.885944000 | -1.810785000 | -1.065088000 |

<sup>3</sup>RC<sub>R4</sub>

|    |              |              |              |
|----|--------------|--------------|--------------|
| Cu | -2.378488000 | -0.139633000 | 0.499203000  |
| C  | -4.522275000 | 1.760278000  | 1.707484000  |
| H  | -3.816678000 | 1.799347000  | 2.532097000  |
| C  | -5.752004000 | 2.410692000  | 1.769000000  |
| H  | -6.023267000 | 2.977224000  | 2.653324000  |
| C  | -6.614993000 | 2.304451000  | 0.678667000  |
| H  | -7.586466000 | 2.789350000  | 0.692450000  |
| C  | -6.216058000 | 1.559214000  | -0.431474000 |
| H  | -6.866319000 | 1.453502000  | -1.294649000 |
| C  | -4.961789000 | 0.949206000  | -0.424111000 |
| C  | -4.431721000 | 0.195732000  | -1.633859000 |
| H  | -5.266441000 | -0.166101000 | -2.253012000 |
| H  | -3.861618000 | 0.899926000  | -2.251862000 |
| C  | -4.213932000 | -2.093154000 | -0.760596000 |
| H  | -4.600049000 | -2.711019000 | -1.585781000 |
| H  | -5.082695000 | -1.752946000 | -0.183652000 |
| C  | -3.327410000 | -2.927027000 | 0.149694000  |
| C  | -3.453141000 | -4.313564000 | 0.223333000  |
| H  | -4.165496000 | -4.829176000 | -0.413691000 |
| C  | -2.655316000 | -5.019911000 | 1.124449000  |
| H  | -2.738208000 | -6.099928000 | 1.200117000  |
| C  | -1.746883000 | -4.318847000 | 1.915531000  |
| H  | -1.101231000 | -4.827325000 | 2.623308000  |
| C  | -1.671033000 | -2.935007000 | 1.773755000  |
| H  | -0.971394000 | -2.343648000 | 2.356313000  |
| C  | -2.500841000 | -1.191814000 | -2.274951000 |
| H  | -2.946457000 | -1.308291000 | -3.274271000 |
| H  | -2.050477000 | -2.156143000 | -2.012076000 |
| C  | -1.396189000 | -0.150268000 | -2.315326000 |
| C  | -0.785364000 | 0.192137000  | -3.515705000 |
| H  | -1.139754000 | -0.228311000 | -4.451140000 |
| C  | 0.312781000  | 1.056940000  | -3.479834000 |
| H  | 0.841818000  | 1.308930000  | -4.394111000 |
| C  | 0.745552000  | 1.565960000  | -2.265122000 |
| H  | 1.646345000  | 2.161706000  | -2.195307000 |

|   |              |              |              |
|---|--------------|--------------|--------------|
| C | 0.030271000  | 1.236292000  | -1.101837000 |
| C | 1.028399000  | 2.852143000  | 0.649568000  |
| N | -4.135655000 | 1.048607000  | 0.636516000  |
| N | -3.517273000 | -0.892874000 | -1.252703000 |
| N | -2.445558000 | -2.253169000 | 0.915294000  |
| N | -1.010919000 | 0.377192000  | -1.131995000 |
| N | 0.387257000  | 1.695631000  | 0.164603000  |
| H | 0.393762000  | 0.975720000  | 0.883688000  |
| O | 1.617706000  | 2.735371000  | 1.712662000  |
| C | 0.891464000  | 4.244668000  | -0.012535000 |
| C | 0.585041000  | 5.224450000  | 1.149269000  |
| H | 1.337551000  | 5.145833000  | 1.935175000  |
| H | 0.574497000  | 6.250317000  | 0.765709000  |
| H | -0.396172000 | 5.018181000  | 1.593126000  |
| C | -0.236245000 | 4.384048000  | -1.053244000 |
| H | -0.013253000 | 3.902655000  | -2.007289000 |
| H | -1.184960000 | 3.982946000  | -0.676661000 |
| H | -0.390834000 | 5.448149000  | -1.261685000 |
| C | 2.262603000  | 4.626416000  | -0.620640000 |
| H | 3.036239000  | 4.618313000  | 0.152858000  |
| H | 2.583730000  | 3.945910000  | -1.416354000 |
| H | 2.207736000  | 5.636838000  | -1.040867000 |
| O | -1.705891000 | 0.480052000  | 2.310553000  |
| O | -0.579347000 | 0.020930000  | 2.634754000  |
| C | 3.573233000  | -0.706797000 | -1.693447000 |
| C | 4.005788000  | 0.551688000  | -1.283269000 |
| C | 4.258800000  | 0.797500000  | 0.063726000  |
| C | 4.082882000  | -0.192627000 | 1.035359000  |
| C | 3.628056000  | -1.461322000 | 0.593303000  |
| C | 3.368724000  | -1.740659000 | -0.767841000 |
| H | 3.390114000  | -0.888530000 | -2.743116000 |
| H | 4.604291000  | 1.786911000  | 0.331787000  |
| H | 3.717798000  | -2.236004000 | 2.355199000  |
| O | 3.406744000  | -2.497016000 | 1.479292000  |
| C | 2.873608000  | -3.128889000 | -1.237484000 |
| C | 3.917378000  | -4.220159000 | -0.892486000 |
| C | 1.515465000  | -3.462823000 | -0.570366000 |
| C | 2.650556000  | -3.180070000 | -2.763883000 |
| H | 4.868254000  | -4.014730000 | -1.397494000 |

|   |             |              |              |
|---|-------------|--------------|--------------|
| H | 4.104105000 | -4.275535000 | 0.180643000  |
| H | 3.562313000 | -5.200669000 | -1.233613000 |
| H | 0.762327000 | -2.709151000 | -0.838295000 |
| H | 1.155431000 | -4.439410000 | -0.918767000 |
| H | 1.598247000 | -3.494090000 | 0.517007000  |
| H | 2.300106000 | -4.180197000 | -3.042285000 |
| H | 1.891977000 | -2.460527000 | -3.096391000 |
| H | 3.573463000 | -2.991680000 | -3.323626000 |
| C | 4.398612000 | 0.107941000  | 2.523812000  |
| C | 3.126633000 | -0.052517000 | 3.400938000  |
| C | 5.554599000 | -0.797686000 | 3.031337000  |
| C | 4.873656000 | 1.563057000  | 2.727777000  |
| H | 2.371745000 | 0.676866000  | 3.092074000  |
| H | 2.664943000 | -1.044653000 | 3.346125000  |
| H | 3.372089000 | 0.135330000  | 4.452777000  |
| H | 6.460682000 | -0.622258000 | 2.441602000  |
| H | 5.779394000 | -0.563593000 | 4.078028000  |
| H | 5.355780000 | -1.875124000 | 2.981491000  |
| H | 5.082824000 | 1.724717000  | 3.790933000  |
| H | 5.796973000 | 1.773949000  | 2.177219000  |
| H | 4.106811000 | 2.283450000  | 2.428013000  |
| O | 4.172631000 | 1.624754000  | -2.139863000 |
| C | 4.482746000 | 1.339948000  | -3.496600000 |
| H | 3.615851000 | 0.947002000  | -4.047223000 |
| H | 4.785256000 | 2.288354000  | -3.946054000 |
| H | 5.305836000 | 0.618807000  | -3.574201000 |

**<sup>3</sup>RC<sub>R5</sub>**

|    |              |              |              |
|----|--------------|--------------|--------------|
| Cu | -4.121520000 | -0.402721000 | -0.162779000 |
| C  | -4.770643000 | -1.779815000 | -2.882877000 |
| H  | -3.988043000 | -1.116408000 | -3.238620000 |
| C  | -5.464394000 | -2.630369000 | -3.740263000 |
| H  | -5.228093000 | -2.645028000 | -4.798771000 |
| C  | -6.463184000 | -3.444905000 | -3.206308000 |
| H  | -7.030508000 | -4.114449000 | -3.845809000 |
| C  | -6.730680000 | -3.385991000 | -1.837779000 |
| H  | -7.504277000 | -4.004708000 | -1.393115000 |
| C  | -5.983659000 | -2.518451000 | -1.041905000 |

|   |              |              |              |
|---|--------------|--------------|--------------|
| C | -6.152862000 | -2.450150000 | 0.465551000  |
| H | -7.169691000 | -2.754249000 | 0.755508000  |
| H | -5.461151000 | -3.166857000 | 0.923882000  |
| C | -6.878083000 | -0.126717000 | 0.732625000  |
| H | -7.745787000 | -0.278776000 | 1.391737000  |
| H | -7.226856000 | -0.282554000 | -0.295352000 |
| C | -6.351385000 | 1.286611000  | 0.868262000  |
| C | -7.153791000 | 2.301691000  | 1.368212000  |
| H | -8.164015000 | 2.092429000  | 1.703486000  |
| C | -6.611467000 | 3.590593000  | 1.448655000  |
| H | -7.193142000 | 4.406402000  | 1.867298000  |
| C | -5.311320000 | 3.810430000  | 1.030267000  |
| H | -4.844245000 | 4.779900000  | 1.145781000  |
| C | -4.567889000 | 2.734730000  | 0.498140000  |
| C | -5.392423000 | -1.144767000 | 2.400630000  |
| H | -6.086438000 | -1.730184000 | 3.021681000  |
| H | -5.420439000 | -0.116992000 | 2.779439000  |
| C | -3.983808000 | -1.685293000 | 2.534231000  |
| C | -3.602519000 | -2.407044000 | 3.658171000  |
| H | -4.323928000 | -2.640155000 | 4.434333000  |
| C | -2.262687000 | -2.793649000 | 3.770523000  |
| H | -1.913437000 | -3.319060000 | 4.654346000  |
| C | -1.376715000 | -2.480277000 | 2.752099000  |
| H | -0.324628000 | -2.721943000 | 2.830836000  |
| C | -1.853052000 | -1.804742000 | 1.611176000  |
| C | 0.230277000  | -1.948401000 | 0.124181000  |
| N | -5.026638000 | -1.728668000 | -1.566294000 |
| N | -5.816294000 | -1.113877000 | 0.991721000  |
| N | -5.085986000 | 1.487821000  | 0.437986000  |
| N | -3.135368000 | -1.389564000 | 1.526986000  |
| N | -1.034047000 | -1.461800000 | 0.547725000  |
| H | -1.200424000 | -0.530476000 | 0.163683000  |
| O | 1.017045000  | -1.121012000 | -0.296596000 |
| C | 0.538338000  | -3.463593000 | 0.016612000  |
| C | 1.060588000  | -3.664169000 | -1.430449000 |
| H | 1.914775000  | -3.016148000 | -1.632154000 |
| H | 1.366196000  | -4.707398000 | -1.564597000 |
| H | 0.279692000  | -3.441494000 | -2.166987000 |
| C | -0.666561000 | -4.402001000 | 0.214946000  |

|   |              |              |              |
|---|--------------|--------------|--------------|
| H | -1.017152000 | -4.448751000 | 1.248522000  |
| H | -1.509197000 | -4.112584000 | -0.423603000 |
| H | -0.372235000 | -5.418132000 | -0.069125000 |
| C | 1.680790000  | -3.811441000 | 0.998281000  |
| H | 2.536062000  | -3.147184000 | 0.844871000  |
| H | 1.372800000  | -3.734532000 | 2.047660000  |
| H | 2.009548000  | -4.842796000 | 0.829709000  |
| O | -2.827477000 | 0.194814000  | -1.528937000 |
| O | -1.771517000 | 0.758969000  | -1.072813000 |
| N | -3.260652000 | 2.873450000  | 0.083364000  |
| H | -2.672416000 | 2.052396000  | 0.205121000  |
| C | -2.455822000 | 4.028097000  | -0.146201000 |
| C | -2.915535000 | 5.173252000  | -1.081536000 |
| C | -2.946609000 | 6.491300000  | -0.275617000 |
| H | -2.000032000 | 6.642474000  | 0.251113000  |
| H | -3.103798000 | 7.335983000  | -0.955009000 |
| H | -3.756829000 | 6.511640000  | 0.463521000  |
| C | -4.247127000 | 4.939070000  | -1.818006000 |
| H | -4.275562000 | 3.952626000  | -2.293822000 |
| H | -5.124422000 | 5.036724000  | -1.173714000 |
| H | -4.348545000 | 5.688721000  | -2.610054000 |
| C | -1.790909000 | 5.275848000  | -2.148005000 |
| H | -1.740053000 | 4.366389000  | -2.757484000 |
| H | -1.998975000 | 6.120416000  | -2.813482000 |
| H | -0.818758000 | 5.425414000  | -1.674546000 |
| O | -1.324244000 | 3.998922000  | 0.294569000  |
| C | 8.975544000  | 0.853085000  | 0.289583000  |
| C | 7.587521000  | 0.819085000  | 0.018519000  |
| C | 6.951794000  | -0.316396000 | -0.553279000 |
| C | 7.753930000  | -1.416398000 | -0.841844000 |
| C | 9.130686000  | -1.412325000 | -0.593060000 |
| C | 9.730300000  | -0.286410000 | -0.032622000 |
| H | 7.338464000  | -2.317242000 | -1.273916000 |
| H | 10.792009000 | -0.292907000 | 0.163579000  |
| O | 6.766532000  | 1.889524000  | 0.295410000  |
| H | 7.287575000  | 2.604334000  | 0.680896000  |
| C | 9.668826000  | 2.090929000  | 0.916011000  |
| C | 9.538751000  | 3.326073000  | -0.017403000 |
| C | 9.093803000  | 2.390012000  | 2.328467000  |

|   |              |              |              |
|---|--------------|--------------|--------------|
| C | 11.184018000 | 1.868918000  | 1.116452000  |
| H | 10.036554000 | 3.128706000  | -0.972792000 |
| H | 8.507986000  | 3.608420000  | -0.257201000 |
| H | 10.017768000 | 4.198483000  | 0.442195000  |
| H | 9.273598000  | 1.539792000  | 2.995189000  |
| H | 9.588290000  | 3.269263000  | 2.757654000  |
| H | 8.015412000  | 2.580828000  | 2.352355000  |
| H | 11.628001000 | 2.775660000  | 1.541572000  |
| H | 11.389992000 | 1.045741000  | 1.809148000  |
| H | 11.698047000 | 1.665529000  | 0.171064000  |
| C | 5.431891000  | -0.350793000 | -0.832408000 |
| C | 4.643224000  | -0.201615000 | 0.492504000  |
| C | 5.031163000  | 0.775657000  | -1.818307000 |
| C | 4.997805000  | -1.684815000 | -1.475078000 |
| H | 4.908257000  | -1.005094000 | 1.191457000  |
| H | 4.852264000  | 0.753209000  | 0.978475000  |
| H | 3.565924000  | -0.261581000 | 0.294955000  |
| H | 5.560789000  | 0.660058000  | -2.771737000 |
| H | 3.954732000  | 0.721968000  | -2.021778000 |
| H | 5.255615000  | 1.765331000  | -1.419126000 |
| H | 3.928654000  | -1.629598000 | -1.707898000 |
| H | 5.530120000  | -1.888838000 | -2.410902000 |
| H | 5.148634000  | -2.536890000 | -0.801237000 |
| O | 9.792542000  | -2.559833000 | -0.931650000 |
| C | 11.193761000 | -2.617026000 | -0.725718000 |
| H | 11.451405000 | -2.516425000 | 0.337439000  |
| H | 11.509633000 | -3.599875000 | -1.080285000 |
| H | 11.718882000 | -1.840211000 | -1.297668000 |

<sup>3</sup>RC<sub>R6</sub>

|    |             |             |              |
|----|-------------|-------------|--------------|
| Cu | 1.482086000 | 0.008587000 | -0.373001000 |
| C  | 2.827517000 | 2.312318000 | -1.977249000 |
| H  | 2.141324000 | 1.986499000 | -2.753508000 |
| C  | 3.749842000 | 3.331655000 | -2.199717000 |
| H  | 3.796149000 | 3.821208000 | -3.166487000 |
| C  | 4.604029000 | 3.693413000 | -1.158519000 |
| H  | 5.342363000 | 4.477625000 | -1.296016000 |
| C  | 4.500729000 | 3.031393000 | 0.065685000  |
| H  | 5.151302000 | 3.290691000 | 0.895435000  |



|   |              |              |              |
|---|--------------|--------------|--------------|
| C | 3.541123000  | 2.030717000  | 0.215740000  |
| C | 3.309064000  | 1.336068000  | 1.548352000  |
| H | 4.217457000  | 1.382184000  | 2.167292000  |
| H | 2.528903000  | 1.886955000  | 2.087462000  |
| C | 3.896845000  | -0.993371000 | 1.011127000  |
| H | 4.467829000  | -1.331350000 | 1.888811000  |
| H | 4.598960000  | -0.455440000 | 0.362391000  |
| C | 3.356057000  | -2.188282000 | 0.242287000  |
| C | 3.952676000  | -3.445704000 | 0.326646000  |
| H | 4.794877000  | -3.604724000 | 0.993265000  |
| C | 3.453786000  | -4.486946000 | -0.457411000 |
| H | 3.905390000  | -5.473264000 | -0.409662000 |
| C | 2.364636000  | -4.243299000 | -1.292851000 |
| H | 1.941523000  | -5.025223000 | -1.914217000 |
| C | 1.813579000  | -2.964087000 | -1.310295000 |
| C | 1.995685000  | -0.514116000 | 2.504468000  |
| H | 2.456637000  | -0.283555000 | 3.476305000  |
| H | 1.936524000  | -1.606765000 | 2.432891000  |
| C | 0.582564000  | 0.045261000  | 2.441995000  |
| C | -0.166630000 | 0.267645000  | 3.595979000  |
| H | 0.276079000  | 0.101707000  | 4.573634000  |
| C | -1.490240000 | 0.695251000  | 3.471755000  |
| H | -2.094206000 | 0.867588000  | 4.357669000  |
| C | -2.018965000 | 0.900457000  | 2.199057000  |
| H | -3.042365000 | 1.227287000  | 2.049410000  |
| C | -1.201256000 | 0.677715000  | 1.092168000  |
| N | 2.726827000  | 1.676975000  | -0.798732000 |
| N | 2.829074000  | -0.047149000 | 1.380130000  |
| N | 2.300312000  | -1.959266000 | -0.564970000 |
| N | 0.069116000  | 0.254829000  | 1.212593000  |
| O | 0.342951000  | 0.211869000  | -2.003434000 |
| O | -0.472814000 | -0.742073000 | -2.179210000 |
| H | 0.954288000  | -2.721820000 | -1.928437000 |
| H | -1.566573000 | 0.843745000  | 0.082545000  |
| C | -5.609944000 | -1.213387000 | -0.909869000 |
| C | -4.388912000 | -0.791659000 | -1.425093000 |
| C | -4.013066000 | 0.553806000  | -1.329442000 |
| C | -4.868441000 | 1.465040000  | -0.711208000 |
| C | -6.095187000 | 1.042795000  | -0.189293000 |

|   |              |              |              |
|---|--------------|--------------|--------------|
| C | -6.474186000 | -0.302207000 | -0.285696000 |
| H | -5.917152000 | -2.251701000 | -0.984126000 |
| H | -3.730289000 | -1.509361000 | -1.910455000 |
| H | -4.578937000 | 2.510488000  | -0.658953000 |
| H | -6.746911000 | 1.773498000  | 0.275852000  |
| O | -2.808194000 | 1.025111000  | -1.806765000 |
| H | -2.341942000 | 0.310932000  | -2.273673000 |
| O | -7.644722000 | -0.821480000 | 0.187809000  |
| C | -8.582345000 | 0.064810000  | 0.777382000  |
| H | -8.908097000 | 0.837603000  | 0.068531000  |
| H | -9.439095000 | -0.549252000 | 1.059682000  |
| H | -8.173379000 | 0.548562000  | 1.675055000  |

$^3R_{C_{R7}}$

|    |              |              |              |
|----|--------------|--------------|--------------|
| Cu | 1.016931000  | -0.034310000 | 0.222365000  |
| C  | -1.394036000 | 1.897538000  | -0.136753000 |
| H  | -1.795071000 | 1.341371000  | 0.704540000  |
| C  | -2.150639000 | 2.869652000  | -0.789348000 |
| H  | -3.164197000 | 3.071854000  | -0.458694000 |
| C  | -1.580833000 | 3.536727000  | -1.872482000 |
| H  | -2.138903000 | 4.297958000  | -2.409598000 |
| C  | -0.283737000 | 3.205689000  | -2.271875000 |
| H  | 0.182253000  | 3.700918000  | -3.118410000 |
| C  | 0.408739000  | 2.221919000  | -1.568729000 |
| C  | 1.834949000  | 1.825890000  | -1.908618000 |
| H  | 2.073044000  | 2.091408000  | -2.949067000 |
| H  | 2.521127000  | 2.392207000  | -1.267640000 |
| C  | 1.481120000  | -0.488421000 | -2.668902000 |
| H  | 2.142612000  | -0.589248000 | -3.541879000 |
| H  | 0.559422000  | -0.010150000 | -3.021339000 |
| C  | 1.119436000  | -1.855945000 | -2.114286000 |
| C  | 1.133032000  | -2.996401000 | -2.915963000 |
| H  | 1.481061000  | -2.936354000 | -3.942797000 |
| C  | 0.685788000  | -4.205207000 | -2.380168000 |
| H  | 0.685975000  | -5.106262000 | -2.986236000 |
| C  | 0.237831000  | -4.235316000 | -1.060836000 |
| H  | -0.129072000 | -5.149753000 | -0.607337000 |
| C  | 0.272229000  | -3.057093000 | -0.317474000 |
| H  | -0.077776000 | -3.026888000 | 0.708717000  |

|   |              |              |              |
|---|--------------|--------------|--------------|
| C | 3.485833000  | 0.075911000  | -1.369448000 |
| H | 4.149513000  | 0.492366000  | -2.141023000 |
| H | 3.583915000  | -1.015484000 | -1.412475000 |
| C | 3.916548000  | 0.544995000  | 0.005378000  |
| C | 5.172479000  | 1.090064000  | 0.206395000  |
| H | 5.847611000  | 1.241484000  | -0.628710000 |
| C | 5.547638000  | 1.429298000  | 1.517508000  |
| H | 6.525976000  | 1.857460000  | 1.714342000  |
| C | 4.668298000  | 1.207650000  | 2.554493000  |
| H | 4.931722000  | 1.449366000  | 3.579326000  |
| C | 3.394532000  | 0.652420000  | 2.273797000  |
| N | -0.144981000 | 1.586197000  | -0.516443000 |
| N | 2.070800000  | 0.391890000  | -1.642573000 |
| N | 0.710837000  | -1.896243000 | -0.830201000 |
| N | 3.024287000  | 0.345433000  | 1.009458000  |
| N | 2.495644000  | 0.446007000  | 3.276345000  |
| H | 1.737815000  | -0.207753000 | 3.125945000  |
| O | -0.209551000 | -0.309743000 | 1.763955000  |
| O | 0.085178000  | -1.295802000 | 2.522439000  |
| H | 2.825513000  | 0.518400000  | 4.227971000  |
| C | -4.840500000 | 0.502897000  | 0.595266000  |
| C | -4.669662000 | -0.661983000 | -0.164078000 |
| C | -3.850264000 | -1.690755000 | 0.307403000  |
| C | -3.199927000 | -1.573856000 | 1.537670000  |
| C | -3.396582000 | -0.420415000 | 2.311367000  |
| C | -4.208236000 | 0.608150000  | 1.842359000  |
| H | -5.163471000 | -0.779996000 | -1.121879000 |
| H | -3.713373000 | -2.595668000 | -0.276574000 |
| H | -2.919751000 | -0.331134000 | 3.284485000  |
| H | -4.374269000 | 1.501067000  | 2.437385000  |
| O | -2.402998000 | -2.610984000 | 1.948529000  |
| H | -1.844380000 | -2.305698000 | 2.683393000  |
| O | -5.577386000 | 1.590373000  | 0.206065000  |
| C | -6.411818000 | 1.459212000  | -0.936883000 |
| H | -6.970218000 | 2.393966000  | -1.009899000 |
| H | -5.825271000 | 1.316392000  | -1.854789000 |
| H | -7.114184000 | 0.623690000  | -0.825086000 |

<sup>3</sup>RC<sub>RS</sub>

|    |              |              |              |
|----|--------------|--------------|--------------|
| Cu | -1.557478000 | -0.022690000 | 0.313601000  |
| C  | -1.628416000 | 2.916651000  | 1.509699000  |
| H  | -1.006961000 | 2.482652000  | 2.285813000  |
| C  | -2.037822000 | 4.246541000  | 1.565239000  |
| H  | -1.742188000 | 4.870746000  | 2.401568000  |
| C  | -2.831988000 | 4.742422000  | 0.532000000  |
| H  | -3.177630000 | 5.771725000  | 0.544266000  |
| C  | -3.180182000 | 3.895399000  | -0.520377000 |
| H  | -3.795918000 | 4.249664000  | -1.341540000 |
| C  | -2.719639000 | 2.579146000  | -0.509767000 |
| C  | -2.982393000 | 1.629568000  | -1.663859000 |
| H  | -3.897940000 | 1.916871000  | -2.201310000 |
| H  | -2.152749000 | 1.712897000  | -2.375406000 |
| C  | -4.318296000 | -0.109145000 | -0.560950000 |
| H  | -5.127498000 | -0.224252000 | -1.296864000 |
| H  | -4.583922000 | 0.738232000  | 0.082760000  |
| C  | -4.199157000 | -1.358445000 | 0.288001000  |
| C  | -5.260716000 | -2.237193000 | 0.408116000  |
| H  | -6.182636000 | -2.066435000 | -0.136883000 |
| C  | -5.109452000 | -3.347866000 | 1.255423000  |
| H  | -5.923736000 | -4.055088000 | 1.381894000  |
| C  | -3.918823000 | -3.538909000 | 1.921015000  |
| H  | -3.769537000 | -4.390830000 | 2.576770000  |
| C  | -2.864597000 | -2.608758000 | 1.736223000  |
| C  | -2.663614000 | -0.732082000 | -2.275023000 |
| H  | -3.216256000 | -0.537180000 | -3.205445000 |
| H  | -2.959940000 | -1.728551000 | -1.928554000 |
| C  | -1.169560000 | -0.725963000 | -2.538432000 |
| C  | -0.681567000 | -1.031632000 | -3.795985000 |
| H  | -1.360214000 | -1.223094000 | -4.620096000 |
| C  | 0.712373000  | -1.101693000 | -3.966438000 |
| H  | 1.133021000  | -1.352577000 | -4.935756000 |
| C  | 1.542845000  | -0.834223000 | -2.902079000 |
| H  | 2.622869000  | -0.864379000 | -3.004479000 |
| C  | 0.974806000  | -0.488447000 | -1.647172000 |
| N  | -1.963317000 | 2.100386000  | 0.497766000  |
| N  | -3.038608000 | 0.225794000  | -1.215479000 |
| N  | -3.016302000 | -1.529301000 | 0.932357000  |
| N  | -0.370088000 | -0.462647000 | -1.472847000 |

|   |              |              |              |
|---|--------------|--------------|--------------|
| N | 1.774077000  | -0.199154000 | -0.593806000 |
| H | 1.414023000  | 0.280114000  | 0.222404000  |
| O | -0.412604000 | -0.230898000 | 1.919072000  |
| O | 0.538634000  | 0.614571000  | 2.046566000  |
| H | 2.767924000  | -0.088106000 | -0.745431000 |
| N | -1.661037000 | -2.806782000 | 2.337539000  |
| H | -1.001719000 | -2.040800000 | 2.396321000  |
| H | -1.593018000 | -3.515297000 | 3.052864000  |
| C | 5.203133000  | -0.078524000 | 1.798850000  |
| C | 6.385233000  | -0.618827000 | 1.280421000  |
| C | 6.848653000  | -0.215317000 | 0.023071000  |
| C | 6.116874000  | 0.738483000  | -0.702470000 |
| C | 4.945330000  | 1.277897000  | -0.183728000 |
| C | 4.480974000  | 0.868229000  | 1.074608000  |
| H | 4.853949000  | -0.399829000 | 2.778383000  |
| H | 6.929024000  | -1.348841000 | 1.868504000  |
| H | 6.495835000  | 1.054353000  | -1.669318000 |
| H | 4.395437000  | 2.040550000  | -0.728054000 |
| O | 3.304601000  | 1.425346000  | 1.524944000  |
| H | 3.098419000  | 1.073479000  | 2.405179000  |
| O | 7.981132000  | -0.678276000 | -0.578636000 |
| C | 8.783339000  | -1.613000000 | 0.127324000  |
| H | 9.632588000  | -1.829467000 | -0.522524000 |
| H | 9.148754000  | -1.195163000 | 1.074630000  |
| H | 8.235673000  | -2.543297000 | 0.329334000  |

<sup>3</sup>RC<sub>R9</sub>

|    |              |              |              |
|----|--------------|--------------|--------------|
| Cu | -1.688142000 | -0.411434000 | -0.174056000 |
| C  | -0.043953000 | -2.135912000 | 1.833243000  |
| H  | 0.634462000  | -2.275313000 | 0.995104000  |
| C  | 0.182651000  | -2.784549000 | 3.046076000  |
| H  | 1.046464000  | -3.431526000 | 3.152954000  |
| C  | -0.717414000 | -2.589343000 | 4.091267000  |
| H  | -0.575925000 | -3.086705000 | 5.046150000  |
| C  | -1.812412000 | -1.746773000 | 3.891975000  |
| H  | -2.535219000 | -1.574496000 | 4.683691000  |
| C  | -1.967716000 | -1.119733000 | 2.657618000  |
| C  | -3.087800000 | -0.125771000 | 2.405993000  |
| H  | -3.934025000 | -0.319617000 | 3.081212000  |

|   |              |              |              |
|---|--------------|--------------|--------------|
| H | -2.718078000 | 0.879470000  | 2.640493000  |
| C | -4.381970000 | -1.259796000 | 0.649378000  |
| H | -5.419013000 | -1.088806000 | 0.974558000  |
| H | -4.013036000 | -2.132297000 | 1.202130000  |
| C | -4.336421000 | -1.570902000 | -0.836139000 |
| C | -5.427324000 | -2.123716000 | -1.505476000 |
| H | -6.358272000 | -2.301376000 | -0.975621000 |
| C | -5.299744000 | -2.444792000 | -2.857431000 |
| H | -6.134810000 | -2.879430000 | -3.398480000 |
| C | -4.089402000 | -2.191648000 | -3.501433000 |
| H | -3.948202000 | -2.420436000 | -4.552232000 |
| C | -3.050394000 | -1.625391000 | -2.766666000 |
| H | -2.092278000 | -1.398063000 | -3.222890000 |
| C | -4.069873000 | 1.174459000  | 0.560959000  |
| H | -4.843792000 | 1.532025000  | 1.255925000  |
| H | -4.558890000 | 1.011711000  | -0.406594000 |
| C | -2.994911000 | 2.231483000  | 0.387755000  |
| C | -3.258915000 | 3.564232000  | 0.678015000  |
| H | -4.220591000 | 3.858706000  | 1.084844000  |
| C | -2.267227000 | 4.511158000  | 0.404086000  |
| H | -2.451529000 | 5.566899000  | 0.578707000  |
| C | -1.053144000 | 4.095736000  | -0.117735000 |
| H | -0.288272000 | 4.810530000  | -0.389108000 |
| C | -0.832194000 | 2.722945000  | -0.328276000 |
| C | 1.698692000  | 2.627951000  | -0.898765000 |
| N | -1.096932000 | -1.319896000 | 1.644955000  |
| N | -3.510374000 | -0.119949000 | 0.992356000  |
| N | -3.168974000 | -1.325011000 | -1.463385000 |
| N | -1.803644000 | 1.811835000  | -0.093392000 |
| N | 0.344978000  | 2.214400000  | -0.863235000 |
| H | 0.201169000  | 1.478719000  | -1.552262000 |
| O | 2.351447000  | 2.210676000  | -1.839965000 |
| C | 2.374769000  | 3.432159000  | 0.238850000  |
| C | 3.779626000  | 2.803875000  | 0.417410000  |
| H | 4.346156000  | 2.840501000  | -0.514231000 |
| H | 4.326760000  | 3.358308000  | 1.187268000  |
| H | 3.714186000  | 1.756172000  | 0.729033000  |
| C | 1.649259000  | 3.368329000  | 1.596847000  |
| H | 0.708945000  | 3.923398000  | 1.619478000  |

|   |              |              |              |
|---|--------------|--------------|--------------|
| H | 1.445999000  | 2.332175000  | 1.891675000  |
| H | 2.296945000  | 3.805961000  | 2.363940000  |
| C | 2.567019000  | 4.895238000  | -0.228619000 |
| H | 3.087453000  | 4.925217000  | -1.190696000 |
| H | 1.623945000  | 5.442424000  | -0.334937000 |
| H | 3.174731000  | 5.434743000  | 0.505911000  |
| O | -0.112531000 | -0.982926000 | -1.258697000 |
| O | -0.085806000 | -0.387218000 | -2.386171000 |
| C | 5.715662000  | -2.523159000 | 0.162999000  |
| C | 6.055155000  | -1.316881000 | -0.461904000 |
| C | 5.061355000  | -0.588791000 | -1.131586000 |
| C | 3.750652000  | -1.052655000 | -1.175117000 |
| C | 3.417083000  | -2.260815000 | -0.551239000 |
| C | 4.399148000  | -2.990737000 | 0.114049000  |
| H | 6.462773000  | -3.111724000 | 0.682919000  |
| H | 5.333317000  | 0.341756000  | -1.618857000 |
| H | 2.996356000  | -0.470194000 | -1.699886000 |
| H | 4.133074000  | -3.932668000 | 0.584336000  |
| O | 2.129789000  | -2.766319000 | -0.562655000 |
| H | 1.580765000  | -2.211567000 | -1.141122000 |
| O | 7.306733000  | -0.768817000 | -0.477729000 |
| C | 8.359348000  | -1.483437000 | 0.148341000  |
| H | 9.258487000  | -0.882095000 | 0.003066000  |
| H | 8.179484000  | -1.609592000 | 1.224789000  |
| H | 8.506544000  | -2.470638000 | -0.309855000 |

<sup>3</sup>RC<sub>R10</sub>

|    |              |              |              |
|----|--------------|--------------|--------------|
| Cu | -1.582484000 | -0.219348000 | -0.270971000 |
| C  | -4.369936000 | -0.148821000 | 1.222598000  |
| H  | -3.749948000 | -0.375572000 | 2.084141000  |
| C  | -5.754955000 | -0.055465000 | 1.334718000  |
| H  | -6.233234000 | -0.208882000 | 2.296219000  |
| C  | -6.496607000 | 0.229220000  | 0.189100000  |
| H  | -7.579163000 | 0.302219000  | 0.232427000  |
| C  | -5.824789000 | 0.412796000  | -1.019210000 |
| H  | -6.370147000 | 0.631906000  | -1.932329000 |
| C  | -4.433068000 | 0.316389000  | -1.045773000 |
| C  | -3.647392000 | 0.588609000  | -2.317205000 |
| H  | -4.287125000 | 0.428503000  | -3.199191000 |

|   |              |              |              |
|---|--------------|--------------|--------------|
| H | -3.362388000 | 1.647740000  | -2.322714000 |
| C | -2.643556000 | -1.606424000 | -2.721834000 |
| H | -2.774254000 | -1.752984000 | -3.805916000 |
| H | -3.587357000 | -1.905683000 | -2.249374000 |
| C | -1.547655000 | -2.528690000 | -2.210995000 |
| C | -1.289737000 | -3.739447000 | -2.849489000 |
| H | -1.837680000 | -4.012569000 | -3.745698000 |
| C | -0.309291000 | -4.580486000 | -2.321471000 |
| H | -0.073109000 | -5.522980000 | -2.806098000 |
| C | 0.397744000  | -4.177814000 | -1.195320000 |
| H | 1.212490000  | -4.771144000 | -0.799512000 |
| C | 0.075859000  | -2.951213000 | -0.600915000 |
| C | -1.349239000 | 0.439739000  | -3.170087000 |
| H | -1.699529000 | 0.739448000  | -4.169901000 |
| H | -0.557182000 | -0.303932000 | -3.316969000 |
| C | -0.759853000 | 1.637393000  | -2.445203000 |
| C | -0.443447000 | 2.807374000  | -3.126095000 |
| H | -0.648865000 | 2.895115000  | -4.187998000 |
| C | 0.154375000  | 3.854274000  | -2.416725000 |
| H | 0.435337000  | 4.772649000  | -2.923553000 |
| C | 0.413267000  | 3.695052000  | -1.063999000 |
| H | 0.925296000  | 4.461491000  | -0.494633000 |
| C | 0.038868000  | 2.496456000  | -0.431648000 |
| C | 0.383551000  | 3.109419000  | 2.013804000  |
| N | -3.719031000 | 0.033110000  | 0.061949000  |
| N | -2.410817000 | -0.199990000 | -2.379532000 |
| N | -0.888135000 | -2.149651000 | -1.097116000 |
| N | -0.542957000 | 1.491004000  | -1.117828000 |
| N | 0.326176000  | 2.234571000  | 0.910705000  |
| H | 0.975034000  | 1.447532000  | 1.034968000  |
| O | 1.230914000  | 2.892530000  | 2.861745000  |
| C | -0.690918000 | 4.203019000  | 2.247080000  |
| C | -1.215134000 | 3.953126000  | 3.684104000  |
| H | -0.392193000 | 3.946478000  | 4.400985000  |
| H | -1.923752000 | 4.742067000  | 3.959278000  |
| H | -1.735029000 | 2.989916000  | 3.752792000  |
| C | -1.894540000 | 4.177698000  | 1.286839000  |
| H | -1.647149000 | 4.513396000  | 0.276402000  |
| H | -2.337232000 | 3.176738000  | 1.220927000  |



|   |              |              |              |
|---|--------------|--------------|--------------|
| H | -2.666376000 | 4.855345000  | 1.668477000  |
| C | 0.004975000  | 5.582596000  | 2.210679000  |
| H | 0.860178000  | 5.599726000  | 2.892200000  |
| H | 0.361486000  | 5.840427000  | 1.206147000  |
| H | -0.699785000 | 6.362989000  | 2.518719000  |
| O | -1.413155000 | -0.503965000 | 1.818482000  |
| O | -0.372625000 | -0.319485000 | 2.467607000  |
| N | 0.811146000  | -2.405769000 | 0.462121000  |
| H | 1.170389000  | -1.464895000 | 0.269724000  |
| C | 1.307595000  | -2.888998000 | 1.666784000  |
| C | 0.777918000  | -4.158930000 | 2.369933000  |
| C | 1.792497000  | -5.304149000 | 2.134834000  |
| H | 2.796696000  | -5.002319000 | 2.447668000  |
| H | 1.498269000  | -6.178555000 | 2.725299000  |
| H | 1.839134000  | -5.616940000 | 1.085832000  |
| C | -0.641683000 | -4.585737000 | 1.947835000  |
| H | -1.345712000 | -3.746910000 | 1.998667000  |
| H | -0.687404000 | -5.014411000 | 0.944599000  |
| H | -0.997711000 | -5.355241000 | 2.640851000  |
| C | 0.751921000  | -3.831304000 | 3.883243000  |
| H | 0.050618000  | -3.017679000 | 4.098895000  |
| H | 0.428812000  | -4.718110000 | 4.438502000  |
| H | 1.737732000  | -3.529185000 | 4.239702000  |
| O | 2.168378000  | -2.203887000 | 2.225285000  |
| C | 3.547722000  | 0.949088000  | -1.152144000 |
| C | 3.551898000  | 0.273682000  | 0.072212000  |
| C | 4.756740000  | -0.144671000 | 0.630938000  |
| C | 5.963972000  | 0.108605000  | -0.028876000 |
| C | 5.965987000  | 0.787926000  | -1.252347000 |
| C | 4.745794000  | 1.204886000  | -1.807195000 |
| H | 2.604950000  | 1.271988000  | -1.584232000 |
| H | 4.761896000  | -0.668267000 | 1.583211000  |
| H | 6.888957000  | -0.225169000 | 0.426506000  |
| H | 4.763428000  | 1.730522000  | -2.756702000 |
| O | 2.335043000  | 0.043471000  | 0.699914000  |
| H | 2.463849000  | -0.578205000 | 1.458759000  |
| O | 7.080636000  | 1.090423000  | -1.977468000 |
| C | 8.345957000  | 0.718927000  | -1.451313000 |
| H | 8.433214000  | -0.370213000 | -1.340990000 |

|   |             |             |              |
|---|-------------|-------------|--------------|
| H | 9.084823000 | 1.067432000 | -2.174661000 |
| H | 8.534512000 | 1.196898000 | -0.481043000 |

<sup>3</sup>RC<sub>R11</sub>

|    |              |              |              |
|----|--------------|--------------|--------------|
| Cu | 0.934938000  | 0.003040000  | -0.369306000 |
| C  | 2.151821000  | 2.293543000  | -2.090867000 |
| H  | 1.431523000  | 1.939421000  | -2.822564000 |
| C  | 3.043371000  | 3.322433000  | -2.383475000 |
| H  | 3.029915000  | 3.791432000  | -3.361387000 |
| C  | 3.945478000  | 3.720358000  | -1.397283000 |
| H  | 4.662056000  | 4.512924000  | -1.590555000 |
| C  | 3.918590000  | 3.083621000  | -0.155648000 |
| H  | 4.607941000  | 3.370869000  | 0.632533000  |
| C  | 2.985123000  | 2.071733000  | 0.066465000  |
| C  | 2.834962000  | 1.403140000  | 1.423945000  |
| H  | 3.773521000  | 1.476815000  | 1.993080000  |
| H  | 2.075019000  | 1.953517000  | 1.991721000  |
| C  | 3.433778000  | -0.929106000 | 0.909613000  |
| H  | 4.050979000  | -1.239926000 | 1.765735000  |
| H  | 4.096108000  | -0.394674000 | 0.217674000  |
| C  | 2.876076000  | -2.148039000 | 0.192201000  |
| C  | 3.498163000  | -3.393389000 | 0.271400000  |
| H  | 4.375174000  | -3.524607000 | 0.897982000  |
| C  | 2.979210000  | -4.458724000 | -0.465785000 |
| H  | 3.449798000  | -5.436266000 | -0.421137000 |
| C  | 1.845874000  | -4.250268000 | -1.250464000 |
| H  | 1.406301000  | -5.051657000 | -1.834482000 |
| C  | 1.272300000  | -2.980989000 | -1.265707000 |
| C  | 1.604354000  | -0.445628000 | 2.487409000  |
| H  | 2.110914000  | -0.184338000 | 3.428253000  |
| H  | 1.561845000  | -1.540518000 | 2.443957000  |
| C  | 0.179819000  | 0.086869000  | 2.486293000  |
| C  | -0.512922000 | 0.322531000  | 3.672551000  |
| H  | -0.016857000 | 0.188366000  | 4.629239000  |
| C  | -1.849539000 | 0.721580000  | 3.608086000  |
| H  | -2.410282000 | 0.903514000  | 4.520088000  |
| C  | -2.447697000 | 0.885922000  | 2.360345000  |
| H  | -3.484179000 | 1.188706000  | 2.257453000  |
| C  | -1.683929000 | 0.652743000  | 1.217809000  |

|   |              |              |              |
|---|--------------|--------------|--------------|
| N | 2.124478000  | 1.682905000  | -0.895470000 |
| N | 2.369886000  | 0.008817000  | 1.310655000  |
| N | 1.777532000  | -1.953129000 | -0.565359000 |
| N | -0.400527000 | 0.257631000  | 1.280914000  |
| O | -0.287044000 | 0.156871000  | -1.943832000 |
| O | -1.089009000 | -0.817047000 | -2.070073000 |
| H | 0.379534000  | -2.765622000 | -1.845147000 |
| H | -2.104184000 | 0.786712000  | 0.225134000  |
| C | -6.198059000 | -1.356581000 | -0.683167000 |
| C | -4.999978000 | -0.921622000 | -1.253938000 |
| C | -4.610756000 | 0.413671000  | -1.109062000 |
| C | -5.415508000 | 1.309913000  | -0.396276000 |
| C | -6.608378000 | 0.861390000  | 0.170299000  |
| C | -7.005640000 | -0.471950000 | 0.033207000  |
| H | -6.498563000 | -2.393755000 | -0.803869000 |
| H | -4.374416000 | -1.613029000 | -1.815354000 |
| H | -5.105466000 | 2.347706000  | -0.315695000 |
| H | -7.235795000 | 1.562104000  | 0.714593000  |
| H | -7.937743000 | -0.814144000 | 0.472177000  |
| O | -3.436434000 | 0.900341000  | -1.630655000 |
| H | -2.975136000 | 0.194491000  | -2.115944000 |

<sup>3</sup>RC<sub>R12</sub>

|    |             |             |              |
|----|-------------|-------------|--------------|
| Cu | 0.855268000 | 0.056351000 | 0.238370000  |
| C  | 1.303524000 | 2.701478000 | 1.823312000  |
| H  | 0.443394000 | 2.348296000 | 2.383789000  |
| C  | 1.898728000 | 3.930595000 | 2.093913000  |
| H  | 1.508098000 | 4.560524000 | 2.885751000  |
| C  | 2.990970000 | 4.325083000 | 1.321496000  |
| H  | 3.476470000 | 5.280277000 | 1.497265000  |
| C  | 3.449967000 | 3.478197000 | 0.312198000  |
| H  | 4.294855000 | 3.758822000 | -0.309327000 |
| C  | 2.809700000 | 2.255882000 | 0.110686000  |
| C  | 3.303241000 | 1.247872000 | -0.912132000 |
| H  | 3.843472000 | 1.755174000 | -1.724543000 |
| H  | 4.021245000 | 0.581037000 | -0.420112000 |
| C  | 1.395880000 | 1.089033000 | -2.458536000 |
| H  | 1.889323000 | 1.063199000 | -3.441478000 |
| H  | 1.317627000 | 2.143831000 | -2.167855000 |

|   |              |              |              |
|---|--------------|--------------|--------------|
| C | -0.003793000 | 0.506633000  | -2.550386000 |
| C | -0.733551000 | 0.533170000  | -3.737059000 |
| H | -0.284797000 | 0.927822000  | -4.643687000 |
| C | -2.045294000 | 0.055022000  | -3.734646000 |
| H | -2.635975000 | 0.074216000  | -4.645628000 |
| C | -2.579224000 | -0.449879000 | -2.550707000 |
| H | -3.594719000 | -0.826602000 | -2.496056000 |
| C | -1.780258000 | -0.462853000 | -1.408784000 |
| H | -2.156058000 | -0.866373000 | -0.473513000 |
| C | 2.654210000  | -0.935629000 | -1.847112000 |
| H | 3.515596000  | -0.879598000 | -2.528043000 |
| H | 1.828774000  | -1.391772000 | -2.405648000 |
| C | 2.980595000  | -1.812099000 | -0.654174000 |
| C | 4.049522000  | -2.689837000 | -0.692512000 |
| H | 4.699178000  | -2.730503000 | -1.559923000 |
| C | 4.260887000  | -3.528210000 | 0.415680000  |
| H | 5.086425000  | -4.233675000 | 0.419131000  |
| C | 3.411624000  | -3.452508000 | 1.497507000  |
| H | 3.545271000  | -4.089807000 | 2.365827000  |
| C | 2.342869000  | -2.521143000 | 1.473346000  |
| N | 1.750718000  | 1.883255000  | 0.856886000  |
| N | 2.205803000  | 0.408010000  | -1.429434000 |
| N | -0.522629000 | 0.011083000  | -1.408566000 |
| N | 2.143187000  | -1.708572000 | 0.409984000  |
| N | 1.507891000  | -2.393599000 | 2.540358000  |
| H | 0.596189000  | -1.968988000 | 2.398089000  |
| O | -0.573542000 | 0.191910000  | 1.625421000  |
| O | -1.020087000 | -0.894864000 | 2.125050000  |
| H | 1.549695000  | -3.102518000 | 3.258648000  |
| C | -6.928376000 | 0.839024000  | 0.353979000  |
| C | -6.781399000 | -0.404006000 | -0.268747000 |
| C | -5.681396000 | -1.213891000 | 0.011339000  |
| C | -4.717049000 | -0.775648000 | 0.926073000  |
| C | -4.855442000 | 0.465314000  | 1.556111000  |
| C | -5.963333000 | 1.265326000  | 1.267690000  |
| H | -7.789519000 | 1.463086000  | 0.135802000  |
| H | -7.533291000 | -0.751564000 | -0.972096000 |
| H | -5.565691000 | -2.191231000 | -0.448114000 |
| H | -4.107388000 | 0.797537000  | 2.273607000  |

|   |              |              |             |
|---|--------------|--------------|-------------|
| H | -6.069667000 | 2.225591000  | 1.764994000 |
| O | -3.644303000 | -1.602865000 | 1.153105000 |
| H | -3.068215000 | -1.217188000 | 1.835970000 |

<sup>3</sup>RC<sub>R12</sub>

|    |              |              |              |
|----|--------------|--------------|--------------|
| Cu | -1.046625000 | -0.012219000 | 0.311892000  |
| C  | -0.886350000 | 2.866650000  | 1.639947000  |
| H  | -0.292196000 | 2.352180000  | 2.387667000  |
| C  | -1.192637000 | 4.219841000  | 1.759584000  |
| H  | -0.841456000 | 4.781770000  | 2.618290000  |
| C  | -1.957991000 | 4.820088000  | 0.760408000  |
| H  | -2.224302000 | 5.870925000  | 0.822763000  |
| C  | -2.381022000 | 4.049790000  | -0.323026000 |
| H  | -2.977055000 | 4.485925000  | -1.118925000 |
| C  | -2.021634000 | 2.703419000  | -0.376871000 |
| C  | -2.368880000 | 1.829127000  | -1.567773000 |
| H  | -3.268644000 | 2.205988000  | -2.075455000 |
| H  | -1.545611000 | 1.884949000  | -2.289324000 |
| C  | -3.815418000 | 0.142585000  | -0.525465000 |
| H  | -4.637873000 | 0.119093000  | -1.255194000 |
| H  | -4.012969000 | 0.976812000  | 0.158703000  |
| C  | -3.778298000 | -1.149275000 | 0.265239000  |
| C  | -4.898813000 | -1.954669000 | 0.359420000  |
| H  | -5.811283000 | -1.693686000 | -0.165275000 |
| C  | -4.819404000 | -3.111279000 | 1.153551000  |
| H  | -5.681030000 | -3.763821000 | 1.258375000  |
| C  | -3.639388000 | -3.416607000 | 1.794962000  |
| H  | -3.545036000 | -4.305685000 | 2.410297000  |
| C  | -2.523136000 | -2.556183000 | 1.639058000  |
| C  | -2.227649000 | -0.520130000 | -2.287298000 |
| H  | -2.780357000 | -0.249541000 | -3.198497000 |
| H  | -2.583691000 | -1.508937000 | -1.976958000 |
| C  | -0.740764000 | -0.599171000 | -2.576308000 |
| C  | -0.291103000 | -0.874660000 | -3.854815000 |
| H  | -0.991969000 | -0.983196000 | -4.675402000 |
| C  | 1.093117000  | -1.024900000 | -4.051946000 |
| H  | 1.483038000  | -1.256400000 | -5.038767000 |
| C  | 1.953911000  | -0.860484000 | -2.990938000 |
| H  | 3.028246000  | -0.954016000 | -3.112931000 |

|   |              |              |              |
|---|--------------|--------------|--------------|
| C | 1.426735000  | -0.539105000 | -1.711805000 |
| N | -1.293100000 | 2.124347000  | 0.597859000  |
| N | -2.521440000 | 0.413966000  | -1.181502000 |
| N | -2.604415000 | -1.433459000 | 0.885858000  |
| N | 0.088726000  | -0.438555000 | -1.513040000 |
| N | 2.256631000  | -0.345624000 | -0.661289000 |
| H | 1.933418000  | 0.096085000  | 0.190825000  |
| O | 0.093224000  | -0.368477000 | 1.893868000  |
| O | 1.123556000  | 0.378228000  | 2.030279000  |
| H | 3.254700000  | -0.301057000 | -0.818107000 |
| N | -1.331640000 | -2.865622000 | 2.217106000  |
| H | -0.621229000 | -2.149754000 | 2.305437000  |
| H | -1.308882000 | -3.608800000 | 2.899492000  |
| C | 5.656703000  | -0.845820000 | 1.676124000  |
| C | 6.754316000  | -1.464543000 | 1.075631000  |
| C | 7.265766000  | -0.988759000 | -0.133554000 |
| C | 6.672286000  | 0.121216000  | -0.739672000 |
| C | 5.575131000  | 0.751640000  | -0.149908000 |
| C | 5.068466000  | 0.264569000  | 1.061813000  |
| H | 5.262498000  | -1.219152000 | 2.619465000  |
| H | 7.210500000  | -2.323259000 | 1.560068000  |
| H | 8.121330000  | -1.472883000 | -0.593904000 |
| H | 7.070480000  | 0.509132000  | -1.673307000 |
| H | 5.123412000  | 1.634683000  | -0.593130000 |
| O | 3.977863000  | 0.911312000  | 1.587167000  |
| H | 3.723911000  | 0.493086000  | 2.425318000  |

<sup>3</sup>RC<sub>R13</sub>

|    |              |              |              |
|----|--------------|--------------|--------------|
| Cu | -1.320744000 | -0.316041000 | -0.194424000 |
| C  | 0.225557000  | -2.279958000 | 1.662732000  |
| H  | 0.833171000  | -2.464889000 | 0.780412000  |
| C  | 0.448645000  | -2.987212000 | 2.843010000  |
| H  | 1.240066000  | -3.727717000 | 2.881613000  |
| C  | -0.361651000 | -2.726495000 | 3.945855000  |
| H  | -0.220833000 | -3.265551000 | 4.877922000  |
| C  | -1.366344000 | -1.763556000 | 3.834582000  |
| H  | -2.019017000 | -1.538777000 | 4.672693000  |
| C  | -1.522052000 | -1.084933000 | 2.627832000  |
| C  | -2.540706000 | 0.029460000  | 2.465327000  |

|   |              |              |              |
|---|--------------|--------------|--------------|
| H | -3.360701000 | -0.089828000 | 3.188557000  |
| H | -2.050789000 | 0.983458000  | 2.693046000  |
| C | -4.035645000 | -0.931448000 | 0.765209000  |
| H | -5.033029000 | -0.672763000 | 1.150974000  |
| H | -3.721820000 | -1.847694000 | 1.279870000  |
| C | -4.099726000 | -1.210487000 | -0.726042000 |
| C | -5.273451000 | -1.641354000 | -1.342879000 |
| H | -6.187364000 | -1.740376000 | -0.764942000 |
| C | -5.250403000 | -1.943400000 | -2.705056000 |
| H | -6.151451000 | -2.284211000 | -3.206012000 |
| C | -4.057710000 | -1.792922000 | -3.410996000 |
| H | -3.995960000 | -2.011073000 | -4.471691000 |
| C | -2.931010000 | -1.344189000 | -2.725925000 |
| H | -1.981532000 | -1.198158000 | -3.230932000 |
| C | -3.503053000 | 1.464161000  | 0.710079000  |
| H | -4.201462000 | 1.872453000  | 1.455433000  |
| H | -4.057518000 | 1.371983000  | -0.231199000 |
| C | -2.346553000 | 2.423500000  | 0.498232000  |
| C | -2.472024000 | 3.768343000  | 0.825438000  |
| H | -3.381165000 | 4.139517000  | 1.286802000  |
| C | -1.412622000 | 4.627082000  | 0.518556000  |
| H | -1.490403000 | 5.691074000  | 0.720780000  |
| C | -0.267909000 | 4.113717000  | -0.070208000 |
| H | 0.546215000  | 4.760753000  | -0.366917000 |
| C | -0.185014000 | 2.732333000  | -0.314626000 |
| C | 2.311237000  | 2.358127000  | -0.940480000 |
| N | -0.737805000 | -1.346649000 | 1.560258000  |
| N | -3.043042000 | 0.113459000  | 1.080451000  |
| N | -2.949336000 | -1.062825000 | -1.413215000 |
| N | -1.224311000 | 1.908961000  | -0.050879000 |
| N | 0.916431000  | 2.130494000  | -0.914978000 |
| H | 0.677312000  | 1.437347000  | -1.620601000 |
| O | 2.905951000  | 1.863459000  | -1.883635000 |
| C | 3.084494000  | 3.069100000  | 0.197562000  |
| C | 4.428957000  | 2.312412000  | 0.330194000  |
| H | 4.975682000  | 2.317961000  | -0.614071000 |
| H | 5.041255000  | 2.797685000  | 1.097675000  |
| H | 4.274684000  | 1.268537000  | 0.622840000  |
| C | 2.382912000  | 3.038568000  | 1.569631000  |

|   |             |              |              |
|---|-------------|--------------|--------------|
| H | 1.500422000 | 3.679461000  | 1.626331000  |
| H | 2.087546000 | 2.018823000  | 1.843488000  |
| H | 3.084281000 | 3.392045000  | 2.332847000  |
| C | 3.400933000 | 4.520088000  | -0.240090000 |
| H | 3.904366000 | 4.527784000  | -1.211727000 |
| H | 2.510925000 | 5.154034000  | -0.313680000 |
| H | 4.069075000 | 4.982913000  | 0.494362000  |
| O | 0.158445000 | -0.966293000 | -1.370576000 |
| O | 0.131452000 | -0.375033000 | -2.499276000 |
| C | 5.772831000 | -3.375808000 | 0.148357000  |
| C | 6.361654000 | -2.208038000 | -0.344892000 |
| C | 5.571083000 | -1.272215000 | -1.013687000 |
| C | 4.202240000 | -1.490503000 | -1.189134000 |
| C | 3.627332000 | -2.664422000 | -0.692701000 |
| C | 4.409212000 | -3.609949000 | -0.022799000 |
| H | 6.379564000 | -4.114998000 | 0.664343000  |
| H | 7.425417000 | -2.033791000 | -0.214652000 |
| H | 6.015173000 | -0.363058000 | -1.409240000 |
| H | 3.595575000 | -0.752622000 | -1.710713000 |
| H | 3.942113000 | -4.520287000 | 0.341118000  |
| O | 2.284579000 | -2.940087000 | -0.832483000 |
| H | 1.867499000 | -2.245294000 | -1.368644000 |

<sup>3</sup>RC<sub>R14</sub>

|    |              |              |              |
|----|--------------|--------------|--------------|
| Cu | -0.971138000 | -0.917696000 | -0.109414000 |
| C  | -3.125378000 | -2.230781000 | 1.759220000  |
| H  | -2.408408000 | -1.953202000 | 2.525692000  |
| C  | -4.297305000 | -2.917470000 | 2.067173000  |
| H  | -4.514061000 | -3.187351000 | 3.095177000  |
| C  | -5.166814000 | -3.248979000 | 1.028596000  |
| H  | -6.086278000 | -3.791241000 | 1.227715000  |
| C  | -4.836125000 | -2.878591000 | -0.275258000 |
| H  | -5.489444000 | -3.123271000 | -1.107370000 |
| C  | -3.650189000 | -2.180027000 | -0.500534000 |
| C  | -3.268731000 | -1.672606000 | -1.879428000 |
| H  | -3.746086000 | -2.284578000 | -2.659644000 |
| H  | -3.659427000 | -0.654275000 | -1.993065000 |
| C  | -1.215341000 | -2.930985000 | -2.299750000 |
| H  | -1.343162000 | -3.243749000 | -3.347679000 |



|   |              |              |              |
|---|--------------|--------------|--------------|
| H | -1.765586000 | -3.654979000 | -1.686271000 |
| C | 0.253086000  | -3.000220000 | -1.916062000 |
| C | 1.094518000  | -3.938117000 | -2.507866000 |
| H | 0.720539000  | -4.596062000 | -3.285742000 |
| C | 2.423766000  | -4.002459000 | -2.085949000 |
| H | 3.110752000  | -4.711126000 | -2.538473000 |
| C | 2.874122000  | -3.117516000 | -1.115114000 |
| H | 3.914160000  | -3.092661000 | -0.815372000 |
| C | 1.966883000  | -2.205216000 | -0.559689000 |
| C | -1.388186000 | -0.585641000 | -3.027118000 |
| H | -1.928081000 | -0.684472000 | -3.980524000 |
| H | -0.325155000 | -0.750619000 | -3.236473000 |
| C | -1.562870000 | 0.813001000  | -2.465763000 |
| C | -2.073510000 | 1.844779000  | -3.243193000 |
| H | -2.389607000 | 1.657748000  | -4.264198000 |
| C | -2.153738000 | 3.125120000  | -2.683266000 |
| H | -2.526038000 | 3.959754000  | -3.269782000 |
| C | -1.720624000 | 3.324632000  | -1.382548000 |
| H | -1.710737000 | 4.312653000  | -0.938254000 |
| C | -1.239630000 | 2.228016000  | -0.642364000 |
| C | -1.025570000 | 3.299980000  | 1.654128000  |
| N | -2.809131000 | -1.870164000 | 0.505218000  |
| N | -1.807310000 | -1.608053000 | -2.051423000 |
| N | 0.676061000  | -2.160461000 | -0.949285000 |
| N | -1.175074000 | 0.991795000  | -1.181778000 |
| N | -0.719831000 | 2.362844000  | 0.642647000  |
| H | 0.257654000  | 2.059959000  | 0.713313000  |
| O | -0.102814000 | 3.724458000  | 2.324689000  |
| C | -2.489144000 | 3.643787000  | 2.032985000  |
| C | -2.586843000 | 3.349154000  | 3.552189000  |
| H | -1.820896000 | 3.898306000  | 4.102729000  |
| H | -3.574893000 | 3.645724000  | 3.920969000  |
| H | -2.453398000 | 2.280055000  | 3.756296000  |
| C | -3.579178000 | 2.826582000  | 1.315703000  |
| H | -3.694764000 | 3.092534000  | 0.261501000  |
| H | -3.385371000 | 1.749633000  | 1.383422000  |
| H | -4.542770000 | 3.019068000  | 1.800299000  |
| C | -2.706987000 | 5.157478000  | 1.810335000  |
| H | -1.925081000 | 5.735169000  | 2.311184000  |

|                                   |              |              |              |
|-----------------------------------|--------------|--------------|--------------|
| H                                 | -2.703671000 | 5.425056000  | 0.746650000  |
| H                                 | -3.677236000 | 5.458502000  | 2.220697000  |
| O                                 | -0.495233000 | -0.771358000 | 1.839707000  |
| O                                 | 0.385192000  | 0.035239000  | 2.239906000  |
| N                                 | 2.351756000  | -1.198480000 | 0.332025000  |
| H                                 | 2.036042000  | -0.264153000 | 0.056123000  |
| C                                 | 3.178788000  | -1.133135000 | 1.449226000  |
| C                                 | 3.571075000  | -2.357901000 | 2.304748000  |
| C                                 | 5.030106000  | -2.746655000 | 1.964137000  |
| H                                 | 5.696885000  | -1.886323000 | 2.075876000  |
| H                                 | 5.366839000  | -3.531804000 | 2.649666000  |
| H                                 | 5.136985000  | -3.133830000 | 0.944560000  |
| C                                 | 2.630288000  | -3.571161000 | 2.165398000  |
| H                                 | 1.580620000  | -3.280861000 | 2.290036000  |
| H                                 | 2.733788000  | -4.096823000 | 1.213743000  |
| H                                 | 2.867804000  | -4.291630000 | 2.955107000  |
| C                                 | 3.522020000  | -1.879518000 | 3.777326000  |
| H                                 | 2.506336000  | -1.582882000 | 4.060891000  |
| H                                 | 3.837223000  | -2.698204000 | 4.432666000  |
| H                                 | 4.179789000  | -1.023917000 | 3.936900000  |
| O                                 | 3.539422000  | -0.008637000 | 1.803539000  |
| C                                 | 2.429996000  | 2.905051000  | -1.871097000 |
| C                                 | 3.001745000  | 2.412505000  | -0.695580000 |
| C                                 | 4.356184000  | 2.624636000  | -0.422023000 |
| C                                 | 5.135370000  | 3.336089000  | -1.335659000 |
| C                                 | 4.575318000  | 3.834236000  | -2.513674000 |
| C                                 | 3.220774000  | 3.615518000  | -2.774568000 |
| H                                 | 1.374861000  | 2.735639000  | -2.064384000 |
| H                                 | 4.790887000  | 2.237847000  | 0.495556000  |
| H                                 | 6.186863000  | 3.502783000  | -1.119126000 |
| H                                 | 5.186322000  | 4.390047000  | -3.218265000 |
| H                                 | 2.773322000  | 4.002236000  | -3.686325000 |
| O                                 | 2.192889000  | 1.710294000  | 0.178219000  |
| H                                 | 2.737287000  | 1.364617000  | 0.928927000  |
| <br><sup>3</sup> TS <sub>R1</sub> |              |              |              |
| Cu                                | 2.116733000  | 0.193939000  | -0.229868000 |
| C                                 | 0.647485000  | -0.012529000 | 2.515644000  |
| H                                 | -0.137720000 | 0.499975000  | 1.969377000  |

|   |              |              |              |
|---|--------------|--------------|--------------|
| C | 0.533042000  | -0.279031000 | 3.879148000  |
| H | -0.353776000 | 0.034637000  | 4.419352000  |
| C | 1.577282000  | -0.944489000 | 4.518791000  |
| H | 1.527717000  | -1.162037000 | 5.581596000  |
| C | 2.694489000  | -1.325393000 | 3.773664000  |
| H | 3.526226000  | -1.843880000 | 4.241289000  |
| C | 2.729794000  | -1.034032000 | 2.410369000  |
| C | 3.878222000  | -1.489946000 | 1.524392000  |
| H | 4.772099000  | -1.694241000 | 2.133807000  |
| H | 3.591113000  | -2.438424000 | 1.054410000  |
| C | 4.870978000  | 0.670432000  | 0.896008000  |
| H | 5.958377000  | 0.507470000  | 0.951495000  |
| H | 4.531262000  | 0.886250000  | 1.916300000  |
| C | 4.562732000  | 1.882351000  | 0.030485000  |
| C | 5.495443000  | 2.898319000  | -0.178133000 |
| H | 6.496532000  | 2.812777000  | 0.233988000  |
| C | 5.118596000  | 4.020575000  | -0.917483000 |
| H | 5.827521000  | 4.824706000  | -1.091026000 |
| C | 3.824743000  | 4.090705000  | -1.433150000 |
| H | 3.493192000  | 4.944176000  | -2.014921000 |
| C | 2.956192000  | 3.027977000  | -1.193273000 |
| C | 4.760876000  | -1.154456000 | -0.745960000 |
| H | 5.604131000  | -1.811566000 | -0.482346000 |
| H | 5.171253000  | -0.345591000 | -1.362828000 |
| C | 3.743881000  | -1.915690000 | -1.582739000 |
| C | 4.109926000  | -3.027781000 | -2.340910000 |
| H | 5.126034000  | -3.408310000 | -2.294387000 |
| C | 3.155037000  | -3.633074000 | -3.158951000 |
| H | 3.418488000  | -4.497895000 | -3.760691000 |
| C | 1.861564000  | -3.113934000 | -3.187031000 |
| H | 1.088915000  | -3.554527000 | -3.808094000 |
| C | 1.568681000  | -2.010395000 | -2.387834000 |
| N | 1.721386000  | -0.381528000 | 1.799119000  |
| N | 4.155004000  | -0.532602000 | 0.441249000  |
| N | 3.318367000  | 1.952537000  | -0.477981000 |
| N | 2.489486000  | -1.425487000 | -1.604945000 |
| O | 0.447962000  | 1.054222000  | -0.799155000 |
| O | -0.488175000 | 0.195859000  | -1.200167000 |
| H | 1.939178000  | 3.016501000  | -1.575084000 |

|   |              |              |              |
|---|--------------|--------------|--------------|
| H | 0.578366000  | -1.565975000 | -2.354638000 |
| C | -5.565551000 | 1.090200000  | -0.516118000 |
| C | -4.249851000 | 1.273434000  | -0.102636000 |
| C | -3.454317000 | 0.099808000  | 0.173018000  |
| C | -4.042570000 | -1.222204000 | 0.133099000  |
| C | -5.355183000 | -1.329694000 | -0.286034000 |
| C | -6.114212000 | -0.195567000 | -0.633689000 |
| H | -6.183526000 | 1.946444000  | -0.741423000 |
| H | -5.857039000 | -2.285355000 | -0.357872000 |
| O | -2.178579000 | 0.234281000  | 0.515941000  |
| H | -1.420854000 | 0.239273000  | -0.324373000 |
| C | -3.260752000 | -2.480005000 | 0.571539000  |
| C | -2.038669000 | -2.725633000 | -0.346531000 |
| C | -2.796171000 | -2.316832000 | 2.040295000  |
| C | -4.136833000 | -3.749522000 | 0.507535000  |
| H | -2.349607000 | -2.811801000 | -1.394720000 |
| H | -1.298327000 | -1.929145000 | -0.270924000 |
| H | -1.553073000 | -3.667920000 | -0.063849000 |
| H | -3.656986000 | -2.193061000 | 2.707700000  |
| H | -2.253366000 | -3.215254000 | 2.358669000  |
| H | -2.139562000 | -1.453662000 | 2.158543000  |
| H | -3.549325000 | -4.606166000 | 0.854677000  |
| H | -5.019906000 | -3.676146000 | 1.151596000  |
| H | -4.469393000 | -3.973639000 | -0.512344000 |
| C | -3.697874000 | 2.702395000  | 0.100051000  |
| C | -3.251097000 | 2.879634000  | 1.573494000  |
| C | -2.507457000 | 2.987841000  | -0.848460000 |
| C | -4.769964000 | 3.777492000  | -0.183013000 |
| H | -4.095785000 | 2.737572000  | 2.257760000  |
| H | -2.466415000 | 2.169902000  | 1.840078000  |
| H | -2.866676000 | 3.895706000  | 1.722831000  |
| H | -2.772640000 | 2.776922000  | -1.891019000 |
| H | -2.239081000 | 4.049269000  | -0.781647000 |
| H | -1.624922000 | 2.404870000  | -0.591261000 |
| H | -4.340639000 | 4.766327000  | 0.008570000  |
| H | -5.104867000 | 3.766169000  | -1.226830000 |
| H | -5.646338000 | 3.672910000  | 0.466533000  |
| O | -7.371483000 | -0.454550000 | -1.043404000 |
| C | -8.232451000 | 0.623432000  | -1.410174000 |

|   |              |             |              |
|---|--------------|-------------|--------------|
| H | -7.816795000 | 1.192932000 | -2.249256000 |
| H | -9.170832000 | 0.158239000 | -1.712781000 |
| H | -8.411801000 | 1.292056000 | -0.560389000 |

<sup>3</sup>TS<sub>R2</sub>

|    |              |              |              |
|----|--------------|--------------|--------------|
| Cu | 2.103694000  | -0.139071000 | -0.156099000 |
| C  | 2.955775000  | -2.576417000 | -1.912212000 |
| H  | 1.878712000  | -2.654714000 | -2.029716000 |
| C  | 3.833420000  | -3.502125000 | -2.472177000 |
| H  | 3.449545000  | -4.336364000 | -3.049654000 |
| C  | 5.201978000  | -3.330181000 | -2.264757000 |
| H  | 5.916827000  | -4.035373000 | -2.678351000 |
| C  | 5.644122000  | -2.240412000 | -1.513501000 |
| H  | 6.702933000  | -2.079869000 | -1.333269000 |
| C  | 4.702423000  | -1.350008000 | -0.997217000 |
| C  | 5.106187000  | -0.092475000 | -0.245637000 |
| H  | 6.099737000  | -0.218830000 | 0.210562000  |
| H  | 5.190850000  | 0.726196000  | -0.969889000 |
| C  | 4.160867000  | -0.493528000 | 1.982005000  |
| H  | 4.950605000  | -0.131541000 | 2.658570000  |
| H  | 4.431927000  | -1.517801000 | 1.697510000  |
| C  | 2.826775000  | -0.541067000 | 2.706455000  |
| C  | 2.752218000  | -0.685034000 | 4.091810000  |
| H  | 3.660616000  | -0.701682000 | 4.686577000  |
| C  | 1.499269000  | -0.812276000 | 4.691890000  |
| H  | 1.416415000  | -0.927043000 | 5.768617000  |
| C  | 0.360357000  | -0.787550000 | 3.888585000  |
| H  | -0.633536000 | -0.885332000 | 4.312108000  |
| C  | 0.515542000  | -0.626679000 | 2.513121000  |
| H  | -0.341886000 | -0.600550000 | 1.849261000  |
| C  | 4.061050000  | 1.753785000  | 1.004303000  |
| H  | 5.056635000  | 2.143401000  | 1.265046000  |
| H  | 3.414296000  | 1.911044000  | 1.875729000  |
| C  | 3.492818000  | 2.519925000  | -0.174254000 |
| C  | 4.030284000  | 3.740626000  | -0.545145000 |
| H  | 4.888264000  | 4.147653000  | -0.021177000 |
| C  | 3.429889000  | 4.432606000  | -1.611252000 |
| H  | 3.818481000  | 5.396382000  | -1.927152000 |
| C  | 2.347332000  | 3.878266000  | -2.256408000 |

|   |              |              |              |
|---|--------------|--------------|--------------|
| H | 1.864468000  | 4.385430000  | -3.085917000 |
| C | 1.859330000  | 2.613496000  | -1.833262000 |
| N | 3.383170000  | -1.528301000 | -1.192993000 |
| N | 4.092370000  | 0.303223000  | 0.747048000  |
| N | 1.722298000  | -0.501607000 | 1.936304000  |
| N | 2.431107000  | 1.952276000  | -0.798656000 |
| N | 0.825912000  | 2.020918000  | -2.482290000 |
| H | 0.316128000  | 1.254495000  | -2.040768000 |
| O | 0.465471000  | -0.967329000 | -0.839363000 |
| O | -0.535925000 | -0.135741000 | -1.156433000 |
| H | 0.314863000  | 2.567383000  | -3.159576000 |
| C | -5.492781000 | 1.123896000  | -0.215002000 |
| C | -6.181979000 | 0.009674000  | -0.719421000 |
| C | -5.572022000 | -1.259604000 | -0.736745000 |
| C | -4.271556000 | -1.447002000 | -0.306641000 |
| C | -3.538804000 | -0.279921000 | 0.134358000  |
| C | -4.180470000 | 1.009821000  | 0.230363000  |
| H | -5.997694000 | 2.077459000  | -0.170802000 |
| H | -6.179937000 | -2.080619000 | -1.091955000 |
| H | -1.501120000 | -0.324912000 | -0.305232000 |
| O | -2.266992000 | -0.399649000 | 0.504192000  |
| C | -3.668076000 | -2.867977000 | -0.251279000 |
| C | -2.437619000 | -2.999706000 | -1.182358000 |
| C | -3.261365000 | -3.199057000 | 1.206966000  |
| C | -4.690858000 | -3.935875000 | -0.696075000 |
| H | -2.674134000 | -2.668253000 | -2.200149000 |
| H | -1.580733000 | -2.431278000 | -0.823734000 |
| H | -2.137892000 | -4.053275000 | -1.236888000 |
| H | -4.132735000 | -3.170723000 | 1.871605000  |
| H | -2.839830000 | -4.210368000 | 1.251099000  |
| H | -2.514782000 | -2.497633000 | 1.583529000  |
| H | -4.232267000 | -4.926060000 | -0.606106000 |
| H | -5.591466000 | -3.935195000 | -0.072172000 |
| H | -4.992925000 | -3.810851000 | -1.742202000 |
| C | -3.457231000 | 2.238117000  | 0.827272000  |
| C | -3.009231000 | 1.929782000  | 2.278483000  |
| C | -2.233496000 | 2.631421000  | -0.035530000 |
| C | -4.379696000 | 3.474762000  | 0.893864000  |
| H | -3.874443000 | 1.699086000  | 2.910788000  |

|   |              |             |              |
|---|--------------|-------------|--------------|
| H | -2.319116000 | 1.086119000 | 2.315032000  |
| H | -2.509221000 | 2.808108000 | 2.704234000  |
| H | -2.536360000 | 2.836469000 | -1.069529000 |
| H | -1.780271000 | 3.545624000 | 0.366872000  |
| H | -1.469678000 | 1.854311000 | -0.047228000 |
| H | -3.830433000 | 4.304470000 | 1.350896000  |
| H | -4.702693000 | 3.808572000 | -0.099104000 |
| H | -5.269005000 | 3.295375000 | 1.508384000  |
| O | -7.444607000 | 0.041883000 | -1.186334000 |
| C | -8.165685000 | 1.274200000 | -1.198726000 |
| H | -7.660092000 | 2.020862000 | -1.821652000 |
| H | -9.139648000 | 1.038475000 | -1.627895000 |
| H | -8.296688000 | 1.664639000 | -0.183069000 |

<sup>3</sup>TS<sub>R3</sub>

|    |              |              |              |
|----|--------------|--------------|--------------|
| Cu | -2.121603000 | -0.074700000 | -0.105542000 |
| C  | -1.114874000 | 0.951430000  | -2.923815000 |
| H  | -0.201983000 | 0.456591000  | -2.608504000 |
| C  | -1.214292000 | 1.635961000  | -4.133360000 |
| H  | -0.358543000 | 1.687782000  | -4.798041000 |
| C  | -2.423458000 | 2.249366000  | -4.456820000 |
| H  | -2.535666000 | 2.799644000  | -5.386339000 |
| C  | -3.491172000 | 2.149731000  | -3.564656000 |
| H  | -4.447063000 | 2.616336000  | -3.783206000 |
| C  | -3.318734000 | 1.432972000  | -2.380843000 |
| C  | -4.464204000 | 1.208413000  | -1.412013000 |
| H  | -5.203692000 | 2.019191000  | -1.494267000 |
| H  | -4.975366000 | 0.280029000  | -1.692932000 |
| C  | -3.620352000 | 2.330240000  | 0.600414000  |
| H  | -4.510362000 | 2.907845000  | 0.891710000  |
| H  | -3.085994000 | 2.918183000  | -0.155685000 |
| C  | -2.713712000 | 2.122733000  | 1.797630000  |
| C  | -2.768931000 | 2.966842000  | 2.892904000  |
| H  | -3.494606000 | 3.771848000  | 2.934604000  |
| C  | -1.855256000 | 2.751802000  | 3.939420000  |
| H  | -1.860103000 | 3.400639000  | 4.810414000  |
| C  | -0.960896000 | 1.706341000  | 3.863447000  |
| H  | -0.256124000 | 1.505846000  | 4.664039000  |
| C  | -0.980482000 | 0.861940000  | 2.723859000  |

|   |              |              |              |
|---|--------------|--------------|--------------|
| C | -4.907798000 | 0.242147000  | 0.800486000  |
| H | -5.942837000 | 0.605581000  | 0.720329000  |
| H | -4.600450000 | 0.371743000  | 1.844187000  |
| C | -4.836717000 | -1.231685000 | 0.448034000  |
| C | -5.955827000 | -2.042654000 | 0.537186000  |
| H | -6.919660000 | -1.628453000 | 0.812734000  |
| C | -5.799179000 | -3.414009000 | 0.272083000  |
| H | -6.650811000 | -4.084411000 | 0.342535000  |
| C | -4.562389000 | -3.906561000 | -0.085755000 |
| H | -4.415562000 | -4.959402000 | -0.305370000 |
| C | -3.466855000 | -3.011130000 | -0.182468000 |
| N | -2.143895000 | 0.852493000  | -2.066638000 |
| N | -3.988069000 | 1.047055000  | -0.027923000 |
| N | -1.837342000 | 1.093587000  | 1.701304000  |
| N | -3.615022000 | -1.695339000 | 0.096184000  |
| N | -2.243280000 | -3.435747000 | -0.589344000 |
| H | -1.449198000 | -2.806754000 | -0.493910000 |
| O | -0.488442000 | -1.182831000 | -0.094821000 |
| O | 0.486770000  | -0.818729000 | -0.952156000 |
| H | -2.058760000 | -4.425682000 | -0.643313000 |
| N | -0.173731000 | -0.226979000 | 2.641759000  |
| H | -0.068469000 | -0.681125000 | 1.736850000  |
| H | 0.618071000  | -0.288742000 | 3.264949000  |
| C | 4.404707000  | -1.530280000 | 0.048222000  |
| C | 5.737527000  | -1.380653000 | -0.292301000 |
| C | 6.323440000  | -0.112774000 | -0.465588000 |
| C | 5.564851000  | 1.052133000  | -0.276277000 |
| C | 4.218304000  | 0.977311000  | 0.063708000  |
| C | 3.620504000  | -0.326572000 | 0.206730000  |
| H | 6.390498000  | -2.232733000 | -0.425138000 |
| H | 6.039492000  | 2.014726000  | -0.395175000 |
| O | 2.339148000  | -0.394024000 | 0.572585000  |
| H | 1.592059000  | -0.648123000 | -0.163936000 |
| C | 3.819215000  | -2.945267000 | 0.259286000  |
| C | 3.120081000  | -3.057558000 | 1.637183000  |
| C | 2.824546000  | -3.282704000 | -0.879103000 |
| C | 4.920656000  | -4.027993000 | 0.230519000  |
| H | 3.823492000  | -2.836122000 | 2.448529000  |
| H | 2.272685000  | -2.377319000 | 1.722962000  |



|   |             |              |              |
|---|-------------|--------------|--------------|
| H | 2.758869000 | -4.082643000 | 1.780432000  |
| H | 3.326260000 | -3.248036000 | -1.853148000 |
| H | 2.439551000 | -4.300418000 | -0.739282000 |
| H | 1.971437000 | -2.603166000 | -0.913933000 |
| H | 4.464301000 | -5.004225000 | 0.424831000  |
| H | 5.417989000 | -4.093570000 | -0.743368000 |
| H | 5.683583000 | -3.861858000 | 0.999321000  |
| C | 3.402490000 | 2.271203000  | 0.282901000  |
| C | 2.246466000 | 2.359522000  | -0.743826000 |
| C | 2.840999000 | 2.309489000  | 1.726669000  |
| C | 4.265115000 | 3.538483000  | 0.099104000  |
| H | 1.697158000 | 3.297654000  | -0.596794000 |
| H | 2.637539000 | 2.359769000  | -1.768433000 |
| H | 1.540270000 | 1.534458000  | -0.643485000 |
| H | 3.655606000 | 2.279200000  | 2.459843000  |
| H | 2.287019000 | 3.243393000  | 1.881258000  |
| H | 2.170207000 | 1.471119000  | 1.915802000  |
| H | 3.641521000 | 4.422024000  | 0.271716000  |
| H | 5.096062000 | 3.583732000  | 0.812209000  |
| H | 4.671381000 | 3.621991000  | -0.915471000 |
| O | 7.628228000 | -0.128588000 | -0.801014000 |
| C | 8.326831000 | 1.102185000  | -0.987250000 |
| H | 8.335261000 | 1.694802000  | -0.065224000 |
| H | 9.346969000 | 0.822381000  | -1.250803000 |
| H | 7.884555000 | 1.688060000  | -1.801204000 |

<sup>3</sup>TS<sub>R4</sub>

|    |              |              |              |
|----|--------------|--------------|--------------|
| Cu | -1.739717000 | -0.968326000 | -0.145034000 |
| C  | -0.286625000 | -0.819033000 | 2.610434000  |
| H  | 0.486167000  | -0.350951000 | 2.008117000  |
| C  | -0.109128000 | -1.070541000 | 3.969617000  |
| H  | 0.819494000  | -0.791349000 | 4.455839000  |
| C  | -1.140502000 | -1.691296000 | 4.673319000  |
| H  | -1.034531000 | -1.911677000 | 5.731427000  |
| C  | -2.313124000 | -2.033039000 | 3.998080000  |
| H  | -3.133662000 | -2.520057000 | 4.516634000  |
| C  | -2.421721000 | -1.734934000 | 2.639755000  |
| C  | -3.701895000 | -1.996562000 | 1.861114000  |
| H  | -4.286409000 | -2.794636000 | 2.343921000  |

|   |              |              |              |
|---|--------------|--------------|--------------|
| H | -4.314118000 | -1.087827000 | 1.897659000  |
| C | -2.954794000 | -3.660467000 | 0.215045000  |
| H | -3.777243000 | -4.392394000 | 0.206048000  |
| H | -2.304591000 | -3.921012000 | 1.059143000  |
| C | -2.141807000 | -3.763596000 | -1.064317000 |
| C | -2.130976000 | -4.923480000 | -1.837863000 |
| H | -2.753401000 | -5.768791000 | -1.559941000 |
| C | -1.309070000 | -4.977386000 | -2.964724000 |
| H | -1.284679000 | -5.870038000 | -3.582775000 |
| C | -0.527414000 | -3.868707000 | -3.284370000 |
| H | 0.124311000  | -3.867238000 | -4.151597000 |
| C | -0.599791000 | -2.742143000 | -2.466689000 |
| H | -0.010420000 | -1.850099000 | -2.655317000 |
| C | -4.552626000 | -1.924610000 | -0.446824000 |
| H | -5.511441000 | -2.333278000 | -0.091643000 |
| H | -4.353170000 | -2.387927000 | -1.420649000 |
| C | -4.675907000 | -0.423120000 | -0.649108000 |
| C | -5.913031000 | 0.148251000  | -0.924711000 |
| H | -6.812101000 | -0.459107000 | -0.932556000 |
| C | -5.955308000 | 1.512107000  | -1.229500000 |
| H | -6.894212000 | 1.985409000  | -1.501278000 |
| C | -4.787731000 | 2.257113000  | -1.202907000 |
| H | -4.787324000 | 3.301844000  | -1.482177000 |
| C | -3.583917000 | 1.627964000  | -0.832729000 |
| C | -1.979176000 | 3.638023000  | -0.603835000 |
| N | -1.417895000 | -1.143871000 | 1.964257000  |
| N | -3.439305000 | -2.289792000 | 0.442212000  |
| N | -1.391158000 | -2.690582000 | -1.383347000 |
| N | -3.536442000 | 0.296012000  | -0.599391000 |
| N | -2.369442000 | 2.289025000  | -0.756313000 |
| H | -1.558976000 | 1.707383000  | -0.986336000 |
| O | -0.914726000 | 3.952339000  | -1.109795000 |
| C | -2.745329000 | 4.652771000  | 0.286425000  |
| C | -1.650672000 | 5.421887000  | 1.069334000  |
| H | -0.936183000 | 5.887637000  | 0.388847000  |
| H | -2.120644000 | 6.199930000  | 1.680439000  |
| H | -1.098093000 | 4.751520000  | 1.737347000  |
| C | -3.703046000 | 4.023378000  | 1.316189000  |
| H | -4.594869000 | 3.576444000  | 0.872289000  |

|   |              |              |              |
|---|--------------|--------------|--------------|
| H | -3.195347000 | 3.256283000  | 1.912453000  |
| H | -4.044077000 | 4.803450000  | 2.005431000  |
| C | -3.479184000 | 5.669244000  | -0.620215000 |
| H | -2.785295000 | 6.111106000  | -1.341906000 |
| H | -4.311122000 | 5.225123000  | -1.177359000 |
| H | -3.893771000 | 6.475572000  | -0.005141000 |
| O | -0.301094000 | 0.301883000  | -0.566994000 |
| O | 0.689550000  | -0.126367000 | -1.351407000 |
| C | 6.083118000  | -0.492146000 | -0.012843000 |
| C | 6.484374000  | 0.828857000  | -0.268323000 |
| C | 5.529839000  | 1.859467000  | -0.365365000 |
| C | 4.174690000  | 1.623321000  | -0.222466000 |
| C | 3.766702000  | 0.256204000  | 0.032107000  |
| C | 4.739146000  | -0.807095000 | 0.140902000  |
| H | 6.832345000  | -1.266199000 | 0.062013000  |
| H | 5.915412000  | 2.853500000  | -0.546757000 |
| H | 1.754914000  | 0.010457000  | -0.544700000 |
| O | 2.496456000  | -0.057486000 | 0.252387000  |
| C | 3.175647000  | 2.795222000  | -0.352911000 |
| C | 2.438015000  | 2.689506000  | -1.712622000 |
| C | 2.157221000  | 2.821212000  | 0.814773000  |
| C | 3.897826000  | 4.161697000  | -0.333617000 |
| H | 3.149165000  | 2.782876000  | -2.541805000 |
| H | 1.902110000  | 1.746107000  | -1.829567000 |
| H | 1.698501000  | 3.492994000  | -1.796473000 |
| H | 2.674803000  | 2.878896000  | 1.780264000  |
| H | 1.524871000  | 3.709762000  | 0.714198000  |
| H | 1.507586000  | 1.947402000  | 0.823180000  |
| H | 3.147166000  | 4.956916000  | -0.383802000 |
| H | 4.477791000  | 4.308164000  | 0.584995000  |
| H | 4.564725000  | 4.298212000  | -1.191611000 |
| C | 4.310656000  | -2.264879000 | 0.420337000  |
| C | 3.606701000  | -2.359821000 | 1.797656000  |
| C | 3.367845000  | -2.774884000 | -0.698692000 |
| C | 5.520288000  | -3.223225000 | 0.463717000  |
| H | 4.277598000  | -2.028706000 | 2.599152000  |
| H | 2.702344000  | -1.751451000 | 1.828054000  |
| H | 3.333586000  | -3.402707000 | 2.000678000  |
| H | 3.862052000  | -2.724457000 | -1.676212000 |

|   |             |              |              |
|---|-------------|--------------|--------------|
| H | 3.109969000 | -3.824174000 | -0.509612000 |
| H | 2.442579000 | -2.199728000 | -0.747882000 |
| H | 5.163540000 | -4.240080000 | 0.658372000  |
| H | 6.065908000 | -3.246377000 | -0.486596000 |
| H | 6.223589000 | -2.968103000 | 1.264455000  |
| O | 7.762794000 | 1.218695000  | -0.431115000 |
| C | 8.813977000 | 0.255931000  | -0.348227000 |
| H | 9.735592000 | 0.814948000  | -0.510946000 |
| H | 8.839644000 | -0.215627000 | 0.640794000  |
| H | 8.707943000 | -0.511681000 | -1.123304000 |

<sup>3</sup>TS<sub>R5</sub>

|    |              |              |              |
|----|--------------|--------------|--------------|
| Cu | 2.105876000  | 0.762779000  | 0.146602000  |
| C  | 3.349020000  | 0.564606000  | 3.032574000  |
| H  | 2.311046000  | 0.411249000  | 3.314814000  |
| C  | 4.368459000  | 0.619278000  | 3.980890000  |
| H  | 4.138711000  | 0.507952000  | 5.035245000  |
| C  | 5.675074000  | 0.826503000  | 3.539031000  |
| H  | 6.495768000  | 0.884216000  | 4.247900000  |
| C  | 5.916326000  | 0.964840000  | 2.171411000  |
| H  | 6.922218000  | 1.129792000  | 1.796740000  |
| C  | 4.842263000  | 0.884418000  | 1.284605000  |
| C  | 5.036357000  | 0.942257000  | -0.223148000 |
| H  | 5.974476000  | 1.464106000  | -0.466724000 |
| H  | 5.134914000  | -0.083295000 | -0.595205000 |
| C  | 3.876241000  | 3.018702000  | -0.763529000 |
| H  | 4.603771000  | 3.493184000  | -1.440127000 |
| H  | 4.195761000  | 3.245590000  | 0.260593000  |
| C  | 2.501523000  | 3.620594000  | -0.975646000 |
| C  | 2.371259000  | 4.831063000  | -1.644633000 |
| H  | 3.240134000  | 5.317975000  | -2.074653000 |
| C  | 1.093297000  | 5.388550000  | -1.760326000 |
| H  | 0.941758000  | 6.311898000  | -2.311689000 |
| C  | 0.017845000  | 4.737908000  | -1.185930000 |
| H  | -0.989335000 | 5.118825000  | -1.298575000 |
| C  | 0.235528000  | 3.533884000  | -0.479579000 |
| C  | 3.725462000  | 1.123862000  | -2.302415000 |
| H  | 4.656239000  | 1.253473000  | -2.877568000 |
| H  | 2.977020000  | 1.780834000  | -2.761639000 |
| C  | 3.255751000  | -0.317965000 | -2.411859000 |

|   |              |              |              |
|---|--------------|--------------|--------------|
| C | 3.501966000  | -1.060912000 | -3.561656000 |
| H | 4.059521000  | -0.632369000 | -4.388028000 |
| C | 2.980079000  | -2.355457000 | -3.628689000 |
| H | 3.095638000  | -2.947725000 | -4.531682000 |
| C | 2.312484000  | -2.887192000 | -2.535457000 |
| H | 1.881558000  | -3.877787000 | -2.574636000 |
| C | 2.188442000  | -2.110881000 | -1.369092000 |
| C | 1.417013000  | -3.805148000 | 0.436883000  |
| N | 3.582508000  | 0.694317000  | 1.718519000  |
| N | 3.881236000  | 1.556422000  | -0.904217000 |
| N | 1.460668000  | 2.962107000  | -0.419984000 |
| N | 2.592218000  | -0.818723000 | -1.352948000 |
| N | 1.609763000  | -2.558237000 | -0.192820000 |
| H | 1.169698000  | -1.815553000 | 0.362377000  |
| O | 0.539821000  | -3.838729000 | 1.285555000  |
| C | 2.320943000  | -5.046467000 | 0.211895000  |
| C | 2.439224000  | -5.736270000 | 1.593842000  |
| H | 1.456592000  | -5.981281000 | 1.999066000  |
| H | 3.022950000  | -6.657153000 | 1.489316000  |
| H | 2.949949000  | -5.089297000 | 2.315759000  |
| C | 3.748880000  | -4.726564000 | -0.272821000 |
| H | 3.796992000  | -4.375135000 | -1.304696000 |
| H | 4.224889000  | -3.975030000 | 0.367998000  |
| H | 4.354498000  | -5.637495000 | -0.214667000 |
| C | 1.603290000  | -6.029430000 | -0.744197000 |
| H | 2.173838000  | -6.962867000 | -0.804128000 |
| H | 0.601776000  | -6.264594000 | -0.370534000 |
| H | 1.500800000  | -5.644361000 | -1.764003000 |
| O | 0.627010000  | -0.140116000 | 1.085131000  |
| O | -0.534982000 | 0.083286000  | 0.453761000  |
| N | -0.795376000 | 2.849475000  | 0.128476000  |
| H | -0.706385000 | 1.822485000  | 0.136723000  |
| C | -2.119651000 | 3.251052000  | 0.414773000  |
| C | -2.431066000 | 4.535377000  | 1.227259000  |
| C | -3.341549000 | 5.454008000  | 0.382663000  |
| H | -4.204188000 | 4.897254000  | 0.005207000  |
| H | -3.706550000 | 6.282840000  | 0.999129000  |
| H | -2.814237000 | 5.891302000  | -0.473612000 |
| C | -1.207148000 | 5.304838000  | 1.755402000  |

|   |              |              |              |
|---|--------------|--------------|--------------|
| H | -0.518688000 | 4.642744000  | 2.291933000  |
| H | -0.646466000 | 5.817977000  | 0.970684000  |
| H | -1.546943000 | 6.070781000  | 2.461290000  |
| C | -3.243139000 | 4.034448000  | 2.452118000  |
| H | -2.634439000 | 3.383536000  | 3.090532000  |
| H | -3.564127000 | 4.892792000  | 3.052306000  |
| H | -4.123578000 | 3.474117000  | 2.131525000  |
| O | -3.016888000 | 2.466923000  | 0.149883000  |
| C | -5.936468000 | -0.782606000 | 0.123285000  |
| C | -5.257940000 | -1.341498000 | 1.227815000  |
| C | -3.938648000 | -1.737331000 | 1.144397000  |
| C | -3.259625000 | -1.509383000 | -0.115801000 |
| C | -3.970984000 | -1.024064000 | -1.279288000 |
| C | -5.299219000 | -0.659180000 | -1.124562000 |
| H | -5.834105000 | -1.459224000 | 2.135681000  |
| H | -5.854674000 | -0.266396000 | -1.962954000 |
| O | -1.970262000 | -1.794228000 | -0.242642000 |
| H | -1.303279000 | -1.068322000 | 0.170661000  |
| C | -3.280576000 | -0.898037000 | -2.652798000 |
| C | -2.133273000 | 0.141570000  | -2.585902000 |
| C | -2.730667000 | -2.277239000 | -3.098083000 |
| C | -4.263687000 | -0.423080000 | -3.744404000 |
| H | -2.492590000 | 1.091110000  | -2.175207000 |
| H | -1.307120000 | -0.205712000 | -1.964820000 |
| H | -1.748847000 | 0.322568000  | -3.597413000 |
| H | -3.542101000 | -3.008016000 | -3.195816000 |
| H | -2.251193000 | -2.178935000 | -4.079542000 |
| H | -1.997494000 | -2.665621000 | -2.390135000 |
| H | -3.738663000 | -0.387462000 | -4.704631000 |
| H | -5.113178000 | -1.105243000 | -3.864391000 |
| H | -4.647816000 | 0.584553000  | -3.547608000 |
| C | -3.263709000 | -2.467530000 | 2.324130000  |
| C | -2.858922000 | -3.892188000 | 1.865104000  |
| C | -2.013101000 | -1.711517000 | 2.840246000  |
| C | -4.233091000 | -2.618450000 | 3.516215000  |
| H | -3.737538000 | -4.459604000 | 1.535628000  |
| H | -2.127358000 | -3.861065000 | 1.056756000  |
| H | -2.404050000 | -4.430253000 | 2.704467000  |
| H | -2.220858000 | -0.645157000 | 2.985107000  |

|   |              |              |              |
|---|--------------|--------------|--------------|
| H | -1.719200000 | -2.131012000 | 3.809356000  |
| H | -1.158399000 | -1.821419000 | 2.175003000  |
| H | -3.726770000 | -3.169132000 | 4.315295000  |
| H | -4.538637000 | -1.649627000 | 3.928974000  |
| H | -5.133828000 | -3.183961000 | 3.252473000  |
| O | -7.208179000 | -0.427105000 | 0.362380000  |
| C | -8.002705000 | 0.138086000  | -0.683646000 |
| H | -8.971839000 | 0.347873000  | -0.231179000 |
| H | -7.557862000 | 1.068065000  | -1.053880000 |
| H | -8.127221000 | -0.572078000 | -1.508472000 |

<sup>3</sup>TS<sub>R6</sub>

|    |              |              |              |
|----|--------------|--------------|--------------|
| Cu | 1.272990000  | 0.195013000  | 0.113785000  |
| C  | -0.045224000 | -2.643977000 | 0.151576000  |
| H  | -0.911540000 | -2.077315000 | 0.477603000  |
| C  | -0.068280000 | -4.036036000 | 0.079594000  |
| H  | -0.965659000 | -4.577268000 | 0.359873000  |
| C  | 1.078255000  | -4.702379000 | -0.349008000 |
| H  | 1.100294000  | -5.786558000 | -0.408210000 |
| C  | 2.204146000  | -3.955402000 | -0.699602000 |
| H  | 3.113868000  | -4.442688000 | -1.037681000 |
| C  | 2.145245000  | -2.564829000 | -0.614898000 |
| C  | 3.302505000  | -1.687531000 | -1.064779000 |
| H  | 4.241250000  | -2.262768000 | -1.062174000 |
| H  | 3.118216000  | -1.386689000 | -2.103237000 |
| C  | 3.994326000  | -0.676997000 | 1.066690000  |
| H  | 5.094709000  | -0.691448000 | 1.036341000  |
| H  | 3.673922000  | -1.670857000 | 1.402445000  |
| C  | 3.507027000  | 0.343656000  | 2.083024000  |
| C  | 4.299832000  | 0.761536000  | 3.151960000  |
| H  | 5.320430000  | 0.402967000  | 3.247257000  |
| C  | 3.757951000  | 1.639187000  | 4.092287000  |
| H  | 4.355653000  | 1.976354000  | 4.933948000  |
| C  | 2.444453000  | 2.079829000  | 3.932370000  |
| H  | 1.987472000  | 2.763661000  | 4.639721000  |
| C  | 1.722582000  | 1.628531000  | 2.829529000  |
| C  | 4.032441000  | 0.659389000  | -0.995661000 |
| H  | 4.966146000  | 0.355213000  | -1.493716000 |
| H  | 4.302579000  | 1.422299000  | -0.255215000 |
| C  | 3.081474000  | 1.290178000  | -2.000792000 |

|                                    |              |              |              |
|------------------------------------|--------------|--------------|--------------|
| C                                  | 3.545267000  | 1.875537000  | -3.178627000 |
| H                                  | 4.601922000  | 1.837643000  | -3.426497000 |
| C                                  | 2.633186000  | 2.510192000  | -4.023086000 |
| H                                  | 2.971877000  | 2.975246000  | -4.944187000 |
| C                                  | 1.285068000  | 2.531675000  | -3.668786000 |
| H                                  | 0.543083000  | 3.012051000  | -4.297759000 |
| C                                  | 0.897041000  | 1.910561000  | -2.482842000 |
| N                                  | 1.038476000  | -1.926690000 | -0.187027000 |
| N                                  | 3.408738000  | -0.455518000 | -0.265693000 |
| N                                  | 2.243187000  | 0.780579000  | 1.930133000  |
| N                                  | 1.776403000  | 1.305692000  | -1.668303000 |
| O                                  | -0.512693000 | 0.747991000  | 0.682918000  |
| O                                  | -1.324432000 | 0.956900000  | -0.369989000 |
| H                                  | 0.699553000  | 1.941223000  | 2.640426000  |
| H                                  | -0.137222000 | 1.880614000  | -2.152553000 |
| C                                  | -5.946955000 | 1.101321000  | 0.533424000  |
| C                                  | -4.602436000 | 0.783507000  | 0.474987000  |
| C                                  | -4.169307000 | -0.481874000 | -0.017895000 |
| C                                  | -5.156693000 | -1.413998000 | -0.456544000 |
| C                                  | -6.493943000 | -1.106238000 | -0.377400000 |
| C                                  | -6.909924000 | 0.156454000  | 0.114834000  |
| H                                  | -6.251751000 | 2.071857000  | 0.907251000  |
| H                                  | -7.259116000 | -1.808071000 | -0.692806000 |
| O                                  | -2.903491000 | -0.814624000 | -0.059622000 |
| H                                  | -2.176706000 | 0.082890000  | -0.196390000 |
| H                                  | -4.820740000 | -2.371758000 | -0.840342000 |
| H                                  | -3.852382000 | 1.499146000  | 0.797376000  |
| O                                  | -8.239184000 | 0.354966000  | 0.139117000  |
| C                                  | -8.759560000 | 1.597736000  | 0.615111000  |
| H                                  | -9.842982000 | 1.511075000  | 0.534168000  |
| H                                  | -8.480373000 | 1.765084000  | 1.661502000  |
| H                                  | -8.409319000 | 2.432233000  | -0.002879000 |
| <b><sup>3</sup>TS<sub>R7</sub></b> |              |              |              |
| Cu                                 | 1.290192000  | 0.040484000  | -0.151263000 |
| C                                  | 1.536997000  | 0.164992000  | -3.248858000 |
| H                                  | 0.457259000  | 0.247362000  | -3.165439000 |
| C                                  | 2.184362000  | 0.108163000  | -4.480971000 |
| H                                  | 1.609602000  | 0.147047000  | -5.400138000 |
| C                                  | 3.574435000  | -0.007032000 | -4.497265000 |



|   |              |              |              |
|---|--------------|--------------|--------------|
| H | 4.113420000  | -0.062762000 | -5.438395000 |
| C | 4.267296000  | -0.054550000 | -3.286895000 |
| H | 5.349247000  | -0.144905000 | -3.266200000 |
| C | 3.547550000  | 0.021705000  | -2.094437000 |
| C | 4.229495000  | 0.066610000  | -0.737890000 |
| H | 5.218603000  | -0.413536000 | -0.787012000 |
| H | 4.398860000  | 1.117668000  | -0.474812000 |
| C | 3.407541000  | -1.990773000 | 0.319118000  |
| H | 4.311576000  | -2.387261000 | 0.806312000  |
| H | 3.440141000  | -2.316603000 | -0.727844000 |
| C | 2.161702000  | -2.575322000 | 0.962358000  |
| C | 2.186398000  | -3.798465000 | 1.631487000  |
| H | 3.123196000  | -4.333936000 | 1.753453000  |
| C | 0.992614000  | -4.318236000 | 2.133210000  |
| H | 0.986726000  | -5.270086000 | 2.655994000  |
| C | -0.186058000 | -3.595743000 | 1.956579000  |
| H | -1.135912000 | -3.963071000 | 2.329993000  |
| C | -0.127264000 | -2.373542000 | 1.289392000  |
| H | -1.016934000 | -1.773775000 | 1.129549000  |
| C | 3.659822000  | 0.056390000  | 1.652660000  |
| H | 4.734849000  | 0.047376000  | 1.886227000  |
| H | 3.163592000  | -0.587608000 | 2.388029000  |
| C | 3.101760000  | 1.460081000  | 1.785422000  |
| C | 3.806233000  | 2.446061000  | 2.455147000  |
| H | 4.795051000  | 2.246192000  | 2.853665000  |
| C | 3.196982000  | 3.703872000  | 2.608809000  |
| H | 3.715532000  | 4.503026000  | 3.130518000  |
| C | 1.936063000  | 3.917533000  | 2.097197000  |
| H | 1.439053000  | 4.876683000  | 2.205019000  |
| C | 1.277454000  | 2.861464000  | 1.413515000  |
| N | 2.205842000  | 0.122273000  | -2.087018000 |
| N | 3.388102000  | -0.517981000 | 0.320984000  |
| N | 1.021140000  | -1.875968000 | 0.804445000  |
| N | 1.870468000  | 1.655662000  | 1.256212000  |
| N | 0.045341000  | 3.044265000  | 0.872153000  |
| H | -0.521827000 | 2.232888000  | 0.624654000  |
| O | -0.476224000 | 0.360086000  | -0.882947000 |
| O | -1.374521000 | 0.628264000  | 0.100687000  |
| H | -0.457159000 | 3.883847000  | 1.119496000  |

|   |              |              |              |
|---|--------------|--------------|--------------|
| C | -6.626430000 | -1.166790000 | 0.330432000  |
| C | -6.995157000 | 0.118027000  | -0.144064000 |
| C | -6.001758000 | 1.010157000  | -0.605924000 |
| C | -4.675005000 | 0.621282000  | -0.604057000 |
| C | -4.289279000 | -0.666034000 | -0.126972000 |
| C | -5.306463000 | -1.546985000 | 0.349841000  |
| H | -7.414173000 | -1.827820000 | 0.676799000  |
| H | -6.270607000 | 1.994322000  | -0.971613000 |
| H | -2.271475000 | -0.214396000 | -0.093992000 |
| O | -3.044179000 | -1.067950000 | -0.137060000 |
| H | -3.903083000 | 1.293989000  | -0.964939000 |
| H | -5.006515000 | -2.524314000 | 0.713316000  |
| O | -8.310798000 | 0.386683000  | -0.111800000 |
| C | -8.786707000 | 1.654299000  | -0.570085000 |
| H | -8.545110000 | 1.804171000  | -1.628290000 |
| H | -9.868476000 | 1.623748000  | -0.441521000 |
| H | -8.366978000 | 2.470318000  | 0.028836000  |

<sup>3</sup>TS<sub>RR</sub>

|    |              |              |              |
|----|--------------|--------------|--------------|
| Cu | -1.300074000 | -0.091472000 | 0.031911000  |
| C  | -0.311525000 | -1.682494000 | -2.522887000 |
| H  | 0.655002000  | -1.522000000 | -2.055821000 |
| C  | -0.457159000 | -2.328184000 | -3.749155000 |
| H  | 0.417959000  | -2.692258000 | -4.276884000 |
| C  | -1.738669000 | -2.483207000 | -4.275298000 |
| H  | -1.890010000 | -2.973126000 | -5.232646000 |
| C  | -2.828730000 | -1.993242000 | -3.555424000 |
| H  | -3.840508000 | -2.093134000 | -3.936850000 |
| C  | -2.602844000 | -1.371208000 | -2.328028000 |
| C  | -3.744972000 | -0.886508000 | -1.455177000 |
| H  | -4.628900000 | -0.655962000 | -2.068620000 |
| H  | -4.030459000 | -1.697239000 | -0.774673000 |
| C  | -3.286729000 | 1.521931000  | -1.396234000 |
| H  | -4.292696000 | 1.925129000  | -1.586227000 |
| H  | -2.846468000 | 1.283161000  | -2.371863000 |
| C  | -2.424256000 | 2.562994000  | -0.709358000 |
| C  | -2.692855000 | 3.913981000  | -0.845070000 |
| H  | -3.556955000 | 4.252866000  | -1.406226000 |
| C  | -1.808147000 | 4.826241000  | -0.244177000 |

|   |              |              |              |
|---|--------------|--------------|--------------|
| H | -1.977793000 | 5.894776000  | -0.339685000 |
| C | -0.731369000 | 4.360965000  | 0.478885000  |
| H | -0.043408000 | 5.041901000  | 0.969816000  |
| C | -0.535701000 | 2.961627000  | 0.604437000  |
| C | -4.143278000 | 0.381233000  | 0.609833000  |
| H | -5.221801000 | 0.339107000  | 0.398016000  |
| H | -3.936105000 | 1.369372000  | 1.035658000  |
| C | -3.761769000 | -0.679925000 | 1.624423000  |
| C | -4.700176000 | -1.216443000 | 2.490175000  |
| H | -5.742942000 | -0.924760000 | 2.427245000  |
| C | -4.256441000 | -2.137405000 | 3.454700000  |
| H | -4.960250000 | -2.571757000 | 4.158757000  |
| C | -2.925911000 | -2.495662000 | 3.501578000  |
| H | -2.559246000 | -3.211893000 | 4.230162000  |
| C | -2.026549000 | -1.925200000 | 2.565417000  |
| N | -1.361368000 | -1.215465000 | -1.828192000 |
| N | -3.344923000 | 0.264292000  | -0.626931000 |
| N | -1.367941000 | 2.086160000  | -0.008605000 |
| N | -2.452593000 | -1.021231000 | 1.653445000  |
| N | -0.718935000 | -2.289287000 | 2.527373000  |
| H | -0.077166000 | -1.742113000 | 1.955612000  |
| O | 0.509409000  | -0.371464000 | 0.750400000  |
| O | 1.441465000  | -0.675002000 | -0.196590000 |
| H | -0.336065000 | -2.818776000 | 3.295586000  |
| N | 0.459754000  | 2.456746000  | 1.377119000  |
| H | 0.680597000  | 1.466125000  | 1.282492000  |
| H | 1.233187000  | 3.060993000  | 1.613908000  |
| C | 4.689916000  | -0.669768000 | 0.465985000  |
| C | 6.014945000  | -1.067022000 | 0.456469000  |
| C | 7.023023000  | -0.139443000 | 0.112803000  |
| C | 6.671421000  | 1.189624000  | -0.234309000 |
| C | 5.353185000  | 1.579128000  | -0.245232000 |
| C | 4.325203000  | 0.661137000  | 0.116519000  |
| H | 3.905273000  | -1.370648000 | 0.733479000  |
| H | 6.269492000  | -2.086281000 | 0.722590000  |
| H | 7.469441000  | 1.876926000  | -0.495388000 |
| H | 5.065826000  | 2.588641000  | -0.520209000 |
| O | 3.076316000  | 1.072195000  | 0.133941000  |
| H | 2.345831000  | 0.241232000  | 0.005320000  |

|   |             |              |              |
|---|-------------|--------------|--------------|
| O | 8.338097000 | -0.412600000 | 0.083463000  |
| C | 8.796496000 | -1.725647000 | 0.413204000  |
| H | 8.385550000 | -2.469695000 | -0.278431000 |
| H | 9.881007000 | -1.690197000 | 0.311871000  |
| H | 8.530865000 | -1.986245000 | 1.443918000  |

<sup>3</sup>TS<sub>R9</sub>

|    |              |              |              |
|----|--------------|--------------|--------------|
| Cu | -1.577679000 | -0.533003000 | 0.182460000  |
| C  | -2.045693000 | -0.177480000 | 3.231575000  |
| H  | -0.996464000 | -0.457718000 | 3.256206000  |
| C  | -2.782079000 | 0.034425000  | 4.395130000  |
| H  | -2.310539000 | -0.076782000 | 5.365738000  |
| C  | -4.128299000 | 0.379730000  | 4.276018000  |
| H  | -4.737246000 | 0.544045000  | 5.160053000  |
| C  | -4.687585000 | 0.506503000  | 3.003778000  |
| H  | -5.733292000 | 0.771252000  | 2.878121000  |
| C  | -3.879982000 | 0.291714000  | 1.886738000  |
| C  | -4.392228000 | 0.495113000  | 0.469432000  |
| H  | -5.486886000 | 0.381133000  | 0.438346000  |
| H  | -4.171821000 | 1.527585000  | 0.172396000  |
| C  | -4.208888000 | -1.776537000 | -0.444157000 |
| H  | -5.153051000 | -1.898908000 | -0.997386000 |
| H  | -4.422762000 | -2.008633000 | 0.606373000  |
| C  | -3.170979000 | -2.765938000 | -0.948660000 |
| C  | -3.532535000 | -3.957985000 | -1.575694000 |
| H  | -4.578805000 | -4.179137000 | -1.764662000 |
| C  | -2.530868000 | -4.855341000 | -1.948691000 |
| H  | -2.788201000 | -5.791409000 | -2.435446000 |
| C  | -1.199532000 | -4.528828000 | -1.694138000 |
| H  | -0.390858000 | -5.196709000 | -1.971195000 |
| C  | -0.917780000 | -3.311315000 | -1.077631000 |
| H  | 0.098948000  | -2.993454000 | -0.866917000 |
| C  | -3.683457000 | 0.156625000  | -1.860368000 |
| H  | -4.677481000 | 0.495515000  | -2.190891000 |
| H  | -3.388347000 | -0.661729000 | -2.527884000 |
| C  | -2.672534000 | 1.280825000  | -2.015475000 |
| C  | -2.921452000 | 2.345835000  | -2.874193000 |
| H  | -3.870116000 | 2.424875000  | -3.394978000 |
| C  | -1.904920000 | 3.285964000  | -3.071815000 |

|   |              |              |              |
|---|--------------|--------------|--------------|
| H | -2.045168000 | 4.109137000  | -3.766241000 |
| C | -0.703480000 | 3.145949000  | -2.396002000 |
| H | 0.119665000  | 3.825516000  | -2.574237000 |
| C | -0.548388000 | 2.078343000  | -1.491288000 |
| C | 1.659916000  | 2.660391000  | -0.320470000 |
| N | -2.584322000 | -0.050306000 | 2.009361000  |
| N | -3.717813000 | -0.389282000 | -0.494304000 |
| N | -1.882787000 | -2.453800000 | -0.712258000 |
| N | -1.519835000 | 1.154797000  | -1.327778000 |
| N | 0.626844000  | 1.841728000  | -0.791102000 |
| H | 0.871572000  | 0.844698000  | -0.688003000 |
| O | 2.764119000  | 2.143653000  | -0.197685000 |
| C | 1.441400000  | 4.112955000  | 0.182333000  |
| C | 2.241278000  | 4.214133000  | 1.506190000  |
| H | 3.288481000  | 3.949059000  | 1.353028000  |
| H | 2.184305000  | 5.239091000  | 1.888484000  |
| H | 1.828701000  | 3.543360000  | 2.268528000  |
| C | -0.020094000 | 4.491009000  | 0.489675000  |
| H | -0.636704000 | 4.617992000  | -0.402273000 |
| H | -0.497371000 | 3.743725000  | 1.134120000  |
| H | -0.033393000 | 5.445950000  | 1.026483000  |
| C | 2.069724000  | 5.095335000  | -0.833706000 |
| H | 3.108100000  | 4.820381000  | -1.042879000 |
| H | 1.527156000  | 5.126592000  | -1.785193000 |
| H | 2.059714000  | 6.109689000  | -0.419616000 |
| O | 0.196718000  | -0.712219000 | 0.947375000  |
| O | 1.046718000  | -0.872314000 | -0.105925000 |
| C | 6.234929000  | -2.832000000 | 0.428567000  |
| C | 6.611258000  | -1.478847000 | 0.209725000  |
| C | 5.620066000  | -0.473835000 | 0.121895000  |
| C | 4.287397000  | -0.803761000 | 0.262493000  |
| C | 3.897972000  | -2.162105000 | 0.482803000  |
| C | 4.911313000  | -3.168993000 | 0.552642000  |
| H | 7.021570000  | -3.576808000 | 0.490250000  |
| H | 5.890069000  | 0.561656000  | -0.048921000 |
| H | 3.531464000  | -0.026828000 | 0.192071000  |
| H | 1.918746000  | -1.729155000 | 0.333326000  |
| H | 4.600389000  | -4.195296000 | 0.717314000  |
| O | 2.651169000  | -2.518161000 | 0.639767000  |

|   |             |              |              |
|---|-------------|--------------|--------------|
| O | 7.929737000 | -1.263958000 | 0.100364000  |
| C | 8.418475000 | 0.063275000  | -0.118906000 |
| H | 9.502952000 | -0.031068000 | -0.168587000 |
| H | 8.038026000 | 0.468019000  | -1.062951000 |
| H | 8.141317000 | 0.722528000  | 0.710686000  |

<sup>3</sup>TS<sub>R10</sub>

|    |             |              |              |
|----|-------------|--------------|--------------|
| Cu | 1.786850000 | 0.168909000  | 0.278727000  |
| C  | 2.264744000 | -0.225892000 | 3.328990000  |
| H  | 1.198745000 | -0.019648000 | 3.357140000  |
| C  | 3.011435000 | -0.447735000 | 4.484015000  |
| H  | 2.532368000 | -0.414979000 | 5.456730000  |
| C  | 4.377120000 | -0.702175000 | 4.354814000  |
| H  | 4.992834000 | -0.871358000 | 5.233230000  |
| C  | 4.947202000 | -0.733030000 | 3.081283000  |
| H  | 6.007306000 | -0.927539000 | 2.948606000  |
| C  | 4.129418000 | -0.513104000 | 1.972890000  |
| C  | 4.645242000 | -0.610935000 | 0.547296000  |
| H  | 5.724757000 | -0.398488000 | 0.511986000  |
| H  | 4.510484000 | -1.643142000 | 0.202576000  |
| C  | 4.257061000 | 1.680623000  | -0.222525000 |
| H  | 5.230233000 | 1.896807000  | -0.688676000 |
| H  | 4.361197000 | 1.881399000  | 0.850330000  |
| C  | 3.191108000 | 2.598210000  | -0.788765000 |
| C  | 3.544220000 | 3.749668000  | -1.477989000 |
| H  | 4.587696000 | 3.987890000  | -1.654230000 |
| C  | 2.517951000 | 4.572746000  | -1.957407000 |
| H  | 2.750439000 | 5.459226000  | -2.540100000 |
| C  | 1.201688000 | 4.231302000  | -1.712295000 |
| H  | 0.389169000 | 4.817985000  | -2.120512000 |
| C  | 0.916300000 | 3.072499000  | -0.956348000 |
| C  | 3.954066000 | -0.189133000 | -1.770951000 |
| H  | 4.989738000 | -0.393508000 | -2.082580000 |
| H  | 3.592037000 | 0.637647000  | -2.393286000 |
| C  | 3.082221000 | -1.403466000 | -2.028957000 |
| C  | 3.455256000 | -2.350583000 | -2.976137000 |
| H  | 4.402556000 | -2.264373000 | -3.498233000 |
| C  | 2.561229000 | -3.387736000 | -3.259514000 |
| H  | 2.793542000 | -4.120511000 | -4.026698000 |

|   |              |              |              |
|---|--------------|--------------|--------------|
| C | 1.363747000  | -3.460976000 | -2.567971000 |
| H | 0.629556000  | -4.222077000 | -2.799833000 |
| C | 1.089307000  | -2.507744000 | -1.567174000 |
| C | -0.964857000 | -3.549315000 | -0.487166000 |
| N | 2.816210000  | -0.257293000 | 2.106858000  |
| N | 3.888636000  | 0.261392000  | -0.369808000 |
| N | 1.908018000  | 2.250574000  | -0.538221000 |
| N | 1.929833000  | -1.475952000 | -1.333160000 |
| N | -0.084498000 | -2.518643000 | -0.832573000 |
| H | -0.481136000 | -1.585859000 | -0.618873000 |
| O | -2.151487000 | -3.263314000 | -0.377898000 |
| C | -0.492068000 | -4.970503000 | -0.073136000 |
| C | -1.215748000 | -5.256809000 | 1.268992000  |
| H | -2.296522000 | -5.153941000 | 1.159512000  |
| H | -0.984346000 | -6.275918000 | 1.597215000  |
| H | -0.884128000 | -4.564288000 | 2.051480000  |
| C | 1.020656000  | -5.129289000 | 0.169441000  |
| H | 1.611220000  | -5.125269000 | -0.748857000 |
| H | 1.404398000  | -4.343234000 | 0.829935000  |
| H | 1.200116000  | -6.091107000 | 0.662358000  |
| C | -0.995029000 | -5.989918000 | -1.120730000 |
| H | -2.070151000 | -5.872051000 | -1.285932000 |
| H | -0.487008000 | -5.885580000 | -2.086367000 |
| H | -0.810892000 | -7.009146000 | -0.763390000 |
| O | 0.069639000  | -0.092801000 | 1.083796000  |
| O | -0.892887000 | -0.010770000 | 0.103007000  |
| N | -0.369756000 | 2.678716000  | -0.665600000 |
| H | -0.521325000 | 1.663526000  | -0.574326000 |
| C | -1.605265000 | 3.365697000  | -0.746964000 |
| C | -1.813242000 | 4.775164000  | -0.131455000 |
| C | -2.178897000 | 5.770689000  | -1.255545000 |
| H | -2.999533000 | 5.379057000  | -1.863932000 |
| H | -2.498310000 | 6.722040000  | -0.815973000 |
| H | -1.334260000 | 5.987670000  | -1.919821000 |
| C | -0.647746000 | 5.303574000  | 0.724396000  |
| H | -0.348260000 | 4.573570000  | 1.484550000  |
| H | 0.235181000  | 5.572193000  | 0.140469000  |
| H | -0.974401000 | 6.209645000  | 1.246406000  |
| C | -3.047368000 | 4.619962000  | 0.796796000  |

|   |              |              |              |
|---|--------------|--------------|--------------|
| H | -2.843061000 | 3.906849000  | 1.603121000  |
| H | -3.289359000 | 5.589464000  | 1.245631000  |
| H | -3.911388000 | 4.261714000  | 0.233494000  |
| O | -2.558349000 | 2.739459000  | -1.176580000 |
| C | -6.532558000 | -0.540395000 | 0.369012000  |
| C | -5.382290000 | -1.272386000 | -0.009553000 |
| C | -4.127249000 | -0.796577000 | 0.307114000  |
| C | -3.982914000 | 0.438410000  | 1.009172000  |
| C | -5.151605000 | 1.167414000  | 1.388488000  |
| C | -6.396500000 | 0.685196000  | 1.078094000  |
| H | -5.470507000 | -2.214119000 | -0.538162000 |
| H | -3.248247000 | -1.372981000 | 0.033516000  |
| H | -5.022158000 | 2.103659000  | 1.920109000  |
| H | -7.300407000 | 1.217908000  | 1.354176000  |
| O | -2.813811000 | 0.922526000  | 1.344911000  |
| H | -1.997139000 | 0.469613000  | 0.821983000  |
| O | -7.792554000 | -0.914047000 | 0.114910000  |
| C | -8.046607000 | -2.128253000 | -0.601074000 |
| H | -9.131102000 | -2.195236000 | -0.682409000 |
| H | -7.600566000 | -2.090580000 | -1.600481000 |
| H | -7.661680000 | -2.992453000 | -0.049415000 |

<sup>3</sup>TS<sub>R11</sub>

|    |              |              |              |
|----|--------------|--------------|--------------|
| Cu | 0.781906000  | -0.034568000 | -0.230654000 |
| C  | -0.884105000 | 1.657604000  | 1.821681000  |
| H  | -1.677770000 | 1.519362000  | 1.093910000  |
| C  | -1.067740000 | 2.453628000  | 2.951377000  |
| H  | -2.016203000 | 2.955754000  | 3.109415000  |
| C  | -0.014169000 | 2.590844000  | 3.853156000  |
| H  | -0.118783000 | 3.211356000  | 4.738216000  |
| C  | 1.183413000  | 1.919171000  | 3.601943000  |
| H  | 2.023572000  | 2.001942000  | 4.284936000  |
| C  | 1.286838000  | 1.129703000  | 2.457463000  |
| C  | 2.525751000  | 0.296382000  | 2.172827000  |
| H  | 3.396689000  | 0.708737000  | 2.703837000  |
| H  | 2.358499000  | -0.711245000 | 2.571816000  |
| C  | 3.396490000  | 1.360637000  | 0.134211000  |
| H  | 4.486381000  | 1.379916000  | 0.283867000  |
| H  | 2.987163000  | 2.229246000  | 0.664197000  |
| C  | 3.059251000  | 1.504232000  | -1.340839000 |



|   |              |              |              |
|---|--------------|--------------|--------------|
| C | 3.922211000  | 2.123644000  | -2.244273000 |
| H | 4.898081000  | 2.470080000  | -1.917629000 |
| C | 3.506875000  | 2.293400000  | -3.566162000 |
| H | 4.160850000  | 2.775020000  | -4.286962000 |
| C | 2.246906000  | 1.832851000  | -3.947807000 |
| H | 1.888375000  | 1.944653000  | -4.965432000 |
| C | 1.448921000  | 1.210715000  | -2.990257000 |
| C | 3.506096000  | -1.082826000 | 0.387902000  |
| H | 4.386070000  | -1.230891000 | 1.031844000  |
| H | 3.876946000  | -0.972400000 | -0.638355000 |
| C | 2.599165000  | -2.301607000 | 0.440658000  |
| C | 3.083574000  | -3.565895000 | 0.774224000  |
| H | 4.123480000  | -3.694362000 | 1.059435000  |
| C | 2.212212000  | -4.655483000 | 0.730105000  |
| H | 2.566964000  | -5.650223000 | 0.982941000  |
| C | 0.883107000  | -4.446129000 | 0.364826000  |
| H | 0.173340000  | -5.265378000 | 0.321893000  |
| C | 0.471287000  | -3.149951000 | 0.060011000  |
| N | 0.270064000  | 1.013326000  | 1.580553000  |
| N | 2.783133000  | 0.157160000  | 0.727103000  |
| N | 1.848642000  | 1.053439000  | -1.719446000 |
| N | 1.312508000  | -2.104459000 | 0.095502000  |
| O | -0.867454000 | -0.070375000 | -1.246181000 |
| O | -1.756504000 | -0.925762000 | -0.697368000 |
| H | 0.462503000  | 0.820909000  | -3.224504000 |
| H | -0.551969000 | -2.916525000 | -0.218584000 |
| C | -6.426677000 | -0.854984000 | -1.688776000 |
| C | -5.101820000 | -0.529375000 | -1.459567000 |
| C | -4.740252000 | 0.230216000  | -0.304042000 |
| C | -5.766764000 | 0.638544000  | 0.600094000  |
| C | -7.088341000 | 0.321503000  | 0.341919000  |
| C | -7.427683000 | -0.429356000 | -0.797558000 |
| H | -6.697837000 | -1.434935000 | -2.566159000 |
| H | -7.867935000 | 0.646794000  | 1.024553000  |
| O | -3.502335000 | 0.574991000  | -0.074725000 |
| H | -2.652357000 | -0.224913000 | -0.466509000 |
| H | -5.476040000 | 1.210214000  | 1.475655000  |
| H | -4.316612000 | -0.840894000 | -2.142023000 |
| H | -8.466038000 | -0.681645000 | -0.989888000 |

${}^3\text{TS}_{\text{R12}}$ 

|    |              |              |              |
|----|--------------|--------------|--------------|
| Cu | 0.791683000  | -0.005378000 | -0.174040000 |
| C  | 1.372790000  | -0.259227000 | -3.214297000 |
| H  | 0.302487000  | -0.084081000 | -3.270939000 |
| C  | 2.144448000  | -0.512064000 | -4.345947000 |
| H  | 1.680442000  | -0.537382000 | -5.326060000 |
| C  | 3.511379000  | -0.736987000 | -4.182649000 |
| H  | 4.143170000  | -0.946095000 | -5.040752000 |
| C  | 4.060233000  | -0.694731000 | -2.900113000 |
| H  | 5.120535000  | -0.866317000 | -2.740841000 |
| C  | 3.224034000  | -0.420894000 | -1.818146000 |
| C  | 3.751507000  | -0.264943000 | -0.402647000 |
| H  | 4.685932000  | -0.830400000 | -0.272340000 |
| H  | 3.992964000  | 0.792241000  | -0.240371000 |
| C  | 2.635662000  | -2.103098000 | 0.784088000  |
| H  | 3.440539000  | -2.491052000 | 1.426232000  |
| H  | 2.763622000  | -2.564224000 | -0.203020000 |
| C  | 1.277900000  | -2.508552000 | 1.329367000  |
| C  | 1.114057000  | -3.637773000 | 2.130073000  |
| H  | 1.978094000  | -4.222188000 | 2.431589000  |
| C  | -0.173085000 | -4.001953000 | 2.527802000  |
| H  | -0.326334000 | -4.879156000 | 3.149319000  |
| C  | -1.253276000 | -3.222415000 | 2.118096000  |
| H  | -2.270043000 | -3.471046000 | 2.402352000  |
| C  | -1.008047000 | -2.098812000 | 1.330980000  |
| H  | -1.817420000 | -1.462717000 | 0.988901000  |
| C  | 2.912569000  | 0.075875000  | 1.884729000  |
| H  | 3.947504000  | 0.006848000  | 2.250027000  |
| H  | 2.274007000  | -0.424719000 | 2.621756000  |
| C  | 2.484706000  | 1.525608000  | 1.773794000  |
| C  | 3.199613000  | 2.529680000  | 2.403244000  |
| H  | 4.108649000  | 2.303250000  | 2.949747000  |
| C  | 2.705784000  | 3.843667000  | 2.319632000  |
| H  | 3.235793000  | 4.659188000  | 2.802935000  |
| C  | 1.543374000  | 4.091749000  | 1.623917000  |
| H  | 1.135983000  | 5.094965000  | 1.546446000  |
| C  | 0.868052000  | 3.012800000  | 0.994602000  |
| N  | 1.904081000  | -0.216118000 | -1.983153000 |

|   |              |              |              |
|---|--------------|--------------|--------------|
| N | 2.741412000  | -0.642607000 | 0.605264000  |
| N | 0.230918000  | -1.750488000 | 0.948169000  |
| N | 1.350049000  | 1.750414000  | 1.067317000  |
| N | -0.263981000 | 3.226689000  | 0.275437000  |
| H | -0.879809000 | 2.442963000  | 0.066510000  |
| O | -0.852372000 | 0.331907000  | -1.133114000 |
| O | -1.815634000 | 0.829414000  | -0.311014000 |
| H | -0.702797000 | 4.133063000  | 0.344779000  |
| C | -7.185656000 | -0.351034000 | 0.204954000  |
| C | -7.449107000 | 0.869368000  | -0.443149000 |
| C | -6.411243000 | 1.569906000  | -1.083343000 |
| C | -5.124461000 | 1.062205000  | -1.089416000 |
| C | -4.839088000 | -0.173368000 | -0.428742000 |
| C | -5.902467000 | -0.865720000 | 0.226699000  |
| H | -7.993934000 | -0.886606000 | 0.694110000  |
| H | -6.625262000 | 2.509398000  | -1.584511000 |
| H | -2.733126000 | 0.120371000  | -0.475081000 |
| O | -3.641284000 | -0.691589000 | -0.431676000 |
| H | -8.457804000 | 1.270871000  | -0.451373000 |
| H | -4.313953000 | 1.582117000  | -1.591380000 |
| H | -5.669129000 | -1.802130000 | 0.723160000  |

<sup>3</sup>TS<sub>R13</sub>

|    |              |              |              |
|----|--------------|--------------|--------------|
| Cu | -0.806818000 | -0.074502000 | 0.045129000  |
| C  | 0.114566000  | -2.142964000 | -2.178674000 |
| H  | 1.073998000  | -2.020948000 | -1.687140000 |
| C  | -0.055905000 | -2.956234000 | -3.297135000 |
| H  | 0.790388000  | -3.497411000 | -3.706582000 |
| C  | -1.322620000 | -3.047059000 | -3.871845000 |
| H  | -1.490780000 | -3.664417000 | -4.749271000 |
| C  | -2.374966000 | -2.326341000 | -3.306353000 |
| H  | -3.373600000 | -2.370042000 | -3.730420000 |
| C  | -2.128298000 | -1.545599000 | -2.177995000 |
| C  | -3.236982000 | -0.798044000 | -1.463285000 |
| H  | -4.053692000 | -0.555561000 | -2.158794000 |
| H  | -3.656586000 | -1.451506000 | -0.689660000 |
| C  | -2.467942000 | 1.517824000  | -1.734932000 |
| H  | -3.404062000 | 1.999830000  | -2.052474000 |
| H  | -2.011541000 | 1.077033000  | -2.629234000 |

|   |              |              |              |
|---|--------------|--------------|--------------|
| C | -1.517025000 | 2.542337000  | -1.149229000 |
| C | -1.590396000 | 3.875710000  | -1.509987000 |
| H | -2.364859000 | 4.225301000  | -2.184022000 |
| C | -0.625948000 | 4.754628000  | -0.985827000 |
| H | -0.641287000 | 5.806096000  | -1.257288000 |
| C | 0.330951000  | 4.281433000  | -0.114943000 |
| H | 1.074500000  | 4.941110000  | 0.320677000  |
| C | 0.325623000  | 2.907787000  | 0.239991000  |
| C | -3.566169000 | 0.820246000  | 0.357527000  |
| H | -4.626476000 | 0.882643000  | 0.073871000  |
| H | -3.247235000 | 1.827525000  | 0.647502000  |
| C | -3.384679000 | -0.113496000 | 1.538136000  |
| C | -4.427081000 | -0.388140000 | 2.406338000  |
| H | -5.415927000 | 0.022435000  | 2.233456000  |
| C | -4.159218000 | -1.203591000 | 3.519920000  |
| H | -4.948012000 | -1.432674000 | 4.230457000  |
| C | -2.894699000 | -1.719590000 | 3.705442000  |
| H | -2.664543000 | -2.359319000 | 4.551539000  |
| C | -1.881354000 | -1.417298000 | 2.760271000  |
| N | -0.900264000 | -1.454675000 | -1.630325000 |
| N | -2.726786000 | 0.411658000  | -0.789673000 |
| N | -0.579053000 | 2.056200000  | -0.300483000 |
| N | -2.136510000 | -0.612558000 | 1.702577000  |
| N | -0.637161000 | -1.949357000 | 2.864175000  |
| H | 0.103819000  | -1.582917000 | 2.269775000  |
| O | 0.897104000  | -0.466916000 | 0.919679000  |
| O | 1.851253000  | -0.954112000 | 0.071298000  |
| H | -0.371059000 | -2.409503000 | 3.721386000  |
| N | 1.190751000  | 2.416548000  | 1.162816000  |
| H | 1.282093000  | 1.405286000  | 1.238625000  |
| H | 2.027940000  | 2.945341000  | 1.361314000  |
| C | 5.111399000  | -1.246658000 | 0.828826000  |
| C | 6.402510000  | -1.744705000 | 0.814380000  |
| C | 7.465208000  | -0.951850000 | 0.346602000  |
| C | 7.222936000  | 0.351509000  | -0.122387000 |
| C | 5.936346000  | 0.859863000  | -0.135798000 |
| C | 4.851515000  | 0.073609000  | 0.351769000  |
| H | 4.280079000  | -1.840117000 | 1.197214000  |
| H | 6.598977000  | -2.749917000 | 1.175666000  |

|   |             |              |              |
|---|-------------|--------------|--------------|
| H | 8.476400000 | -1.347096000 | 0.348509000  |
| H | 8.049295000 | 0.957064000  | -0.482644000 |
| H | 5.718018000 | 1.857525000  | -0.502969000 |
| O | 3.646398000 | 0.587829000  | 0.370264000  |
| H | 2.790368000 | -0.214608000 | 0.273350000  |

<sup>3</sup>TS<sub>R14</sub>

|    |              |              |              |
|----|--------------|--------------|--------------|
| Cu | -1.180003000 | -0.509169000 | 0.187720000  |
| C  | -1.735864000 | -0.011674000 | 3.200175000  |
| H  | -0.694012000 | -0.308781000 | 3.278365000  |
| C  | -2.512663000 | 0.265493000  | 4.322751000  |
| H  | -2.081167000 | 0.189651000  | 5.315067000  |
| C  | -3.846219000 | 0.629508000  | 4.135547000  |
| H  | -4.485012000 | 0.844233000  | 4.987048000  |
| C  | -4.354385000 | 0.710080000  | 2.838085000  |
| H  | -5.388751000 | 0.988789000  | 2.660256000  |
| C  | -3.509027000 | 0.430772000  | 1.764530000  |
| C  | -3.956984000 | 0.580982000  | 0.319926000  |
| H  | -5.048790000 | 0.469855000  | 0.241120000  |
| H  | -3.716143000 | 1.598958000  | -0.008810000 |
| C  | -3.776974000 | -1.723615000 | -0.511575000 |
| H  | -4.692811000 | -1.835430000 | -1.111286000 |
| H  | -4.052682000 | -1.916468000 | 0.532385000  |
| C  | -2.739963000 | -2.752296000 | -0.929926000 |
| C  | -3.097196000 | -3.960705000 | -1.526370000 |
| H  | -4.137689000 | -4.168714000 | -1.757095000 |
| C  | -2.098265000 | -4.892092000 | -1.814091000 |
| H  | -2.352273000 | -5.841674000 | -2.275628000 |
| C  | -0.773982000 | -4.582821000 | -1.506810000 |
| H  | 0.032008000  | -5.277906000 | -1.716114000 |
| C  | -0.494400000 | -3.347490000 | -0.925989000 |
| H  | 0.518039000  | -3.045332000 | -0.676744000 |
| C  | -3.140740000 | 0.152963000  | -1.961004000 |
| H  | -4.116097000 | 0.485920000  | -2.346430000 |
| H  | -2.820017000 | -0.689133000 | -2.585488000 |
| C  | -2.116036000 | 1.265721000  | -2.096027000 |
| C  | -2.318343000 | 2.316060000  | -2.983034000 |
| H  | -3.241666000 | 2.392520000  | -3.547703000 |
| C  | -1.286058000 | 3.245891000  | -3.149879000 |

|   |              |              |              |
|---|--------------|--------------|--------------|
| H | -1.388313000 | 4.057867000  | -3.863751000 |
| C | -0.117672000 | 3.109396000  | -2.418863000 |
| H | 0.717594000  | 3.779836000  | -2.572093000 |
| C | -0.009336000 | 2.055405000  | -1.490653000 |
| C | 2.181413000  | 2.625044000  | -0.266718000 |
| N | -2.226075000 | 0.070717000  | 1.953794000  |
| N | -3.246026000 | -0.348592000 | -0.577946000 |
| N | -1.457443000 | -2.456562000 | -0.643781000 |
| N | -0.996107000 | 1.142364000  | -1.354133000 |
| N | 1.129410000  | 1.821127000  | -0.735446000 |
| H | 1.351486000  | 0.826671000  | -0.599398000 |
| O | 3.260035000  | 2.072393000  | -0.101157000 |
| C | 1.997528000  | 4.098007000  | 0.183401000  |
| C | 2.775092000  | 4.219758000  | 1.518885000  |
| H | 3.816908000  | 3.920311000  | 1.395327000  |
| H | 2.740428000  | 5.258019000  | 1.866134000  |
| H | 2.329163000  | 3.586557000  | 2.294427000  |
| C | 0.541313000  | 4.525445000  | 0.447675000  |
| H | -0.056408000 | 4.631742000  | -0.459911000 |
| H | 0.033415000  | 3.817600000  | 1.113049000  |
| H | 0.543686000  | 5.501383000  | 0.945193000  |
| C | 2.674961000  | 5.027499000  | -0.851051000 |
| H | 3.708502000  | 4.715521000  | -1.029641000 |
| H | 2.153206000  | 5.044897000  | -1.814542000 |
| H | 2.687569000  | 6.054320000  | -0.469257000 |
| O | 0.542348000  | -0.689727000 | 1.033996000  |
| O | 1.443960000  | -0.903023000 | 0.031701000  |
| C | 6.471527000  | -3.244461000 | 0.367195000  |
| C | 6.956046000  | -1.947598000 | 0.104705000  |
| C | 6.074697000  | -0.850950000 | 0.077497000  |
| C | 4.724685000  | -1.025027000 | 0.319703000  |
| C | 4.219272000  | -2.340443000 | 0.584285000  |
| C | 5.125285000  | -3.448849000 | 0.593299000  |
| H | 7.160480000  | -4.083645000 | 0.387227000  |
| H | 8.015566000  | -1.794443000 | -0.077060000 |
| H | 6.456845000  | 0.144609000  | -0.127181000 |
| H | 4.044674000  | -0.177864000 | 0.300771000  |
| H | 2.231673000  | -1.693807000 | 0.495718000  |
| H | 4.717804000  | -4.434159000 | 0.795197000  |

O 2.961193000 -2.562068000 0.837400000

<sup>3</sup>TS<sub>R15</sub>

Cu 1.024463000 0.996323000 0.287261000  
C 1.607104000 0.844169000 3.344865000  
H 0.657531000 0.317213000 3.339492000  
C 2.312736000 1.095446000 4.519321000  
H 1.916155000 0.765389000 5.473474000  
C 3.524783000 1.781365000 4.434171000  
H 4.097957000 2.002607000 5.329589000  
C 3.993600000 2.184919000 3.183005000  
H 4.933316000 2.720027000 3.084539000  
C 3.235102000 1.883641000 2.052130000  
C 3.707928000 2.201599000 0.644480000  
H 4.392285000 3.063112000 0.650034000  
H 4.276576000 1.342535000 0.269549000  
C 1.949141000 3.739067000 -0.088632000  
H 2.568236000 4.542464000 -0.514450000  
H 1.883843000 3.917205000 0.991230000  
C 0.553552000 3.783156000 -0.676486000  
C 0.095388000 4.919012000 -1.326895000  
H 0.744692000 5.777791000 -1.458679000  
C -1.212840000 4.911012000 -1.826863000  
H -1.595037000 5.762785000 -2.381556000  
C -2.006040000 3.796095000 -1.637524000  
H -3.000040000 3.740979000 -2.061247000  
C -1.492338000 2.693294000 -0.919022000  
C 2.931110000 2.165608000 -1.687232000  
H 3.854449000 2.693462000 -1.968536000  
H 2.125293000 2.581722000 -2.302897000  
C 3.060059000 0.685605000 -1.990828000  
C 3.974158000 0.235902000 -2.936478000  
H 4.645502000 0.931424000 -3.429285000  
C 3.975406000 -1.125440000 -3.256687000  
H 4.640141000 -1.509782000 -4.024643000  
C 3.105251000 -1.979322000 -2.600317000  
H 3.048669000 -3.028371000 -2.860781000  
C 2.259291000 -1.462402000 -1.599176000  
C 1.353652000 -3.619106000 -0.575825000

|   |              |              |              |
|---|--------------|--------------|--------------|
| N | 2.061397000  | 1.233694000  | 2.144316000  |
| N | 2.574804000  | 2.416854000  | -0.277569000 |
| N | -0.209877000 | 2.681930000  | -0.482411000 |
| N | 2.220365000  | -0.138026000 | -1.330774000 |
| N | 1.366136000  | -2.254087000 | -0.896909000 |
| H | 0.456764000  | -1.813632000 | -0.692771000 |
| O | 0.258788000  | -4.156456000 | -0.475229000 |
| C | 2.628048000  | -4.415386000 | -0.184624000 |
| C | 2.251258000  | -5.162611000 | 1.121459000  |
| H | 1.362949000  | -5.779429000 | 0.977077000  |
| H | 3.085576000  | -5.802963000 | 1.427216000  |
| H | 2.048292000  | -4.456922000 | 1.935434000  |
| C | 3.879827000  | -3.566348000 | 0.107214000  |
| H | 4.335580000  | -3.138544000 | -0.788024000 |
| H | 3.655626000  | -2.750139000 | 0.803889000  |
| H | 4.636349000  | -4.203173000 | 0.578513000  |
| C | 2.913761000  | -5.470801000 | -1.277823000 |
| H | 2.020530000  | -6.070953000 | -1.475241000 |
| H | 3.239539000  | -5.022290000 | -2.223229000 |
| H | 3.712419000  | -6.141970000 | -0.943023000 |
| O | -0.124556000 | -0.339635000 | 1.026750000  |
| O | -0.920935000 | -0.879875000 | 0.039589000  |
| N | -2.231464000 | 1.557421000  | -0.684856000 |
| H | -1.700779000 | 0.678944000  | -0.624515000 |
| C | -3.620829000 | 1.293112000  | -0.790596000 |
| C | -4.694964000 | 2.222396000  | -0.166021000 |
| C | -5.587607000 | 2.791270000  | -1.292293000 |
| H | -5.954125000 | 1.985829000  | -1.935604000 |
| H | -6.451153000 | 3.304056000  | -0.854446000 |
| H | -5.062704000 | 3.519524000  | -1.921520000 |
| C | -4.155125000 | 3.345143000  | 0.738769000  |
| H | -3.472345000 | 2.952160000  | 1.500295000  |
| H | -3.639285000 | 4.136338000  | 0.190402000  |
| H | -4.996496000 | 3.813965000  | 1.260440000  |
| C | -5.563444000 | 1.282809000  | 0.712079000  |
| H | -4.964668000 | 0.833759000  | 1.512224000  |
| H | -6.375527000 | 1.858839000  | 1.168732000  |
| H | -5.990681000 | 0.478125000  | 0.110491000  |
| O | -3.938791000 | 0.213410000  | -1.255554000 |



|   |              |              |              |
|---|--------------|--------------|--------------|
| C | -4.958773000 | -4.860519000 | 0.247456000  |
| C | -3.604617000 | -4.732098000 | -0.115959000 |
| C | -2.896304000 | -3.588938000 | 0.199697000  |
| C | -3.556446000 | -2.523258000 | 0.894457000  |
| C | -4.935502000 | -2.663668000 | 1.254956000  |
| C | -5.615250000 | -3.820620000 | 0.937740000  |
| H | -5.501650000 | -5.767088000 | -0.002628000 |
| H | -3.106518000 | -5.541689000 | -0.640577000 |
| H | -1.845868000 | -3.496866000 | -0.060724000 |
| H | -5.410611000 | -1.840430000 | 1.777260000  |
| H | -6.659401000 | -3.932287000 | 1.213811000  |
| O | -2.936347000 | -1.431815000 | 1.239239000  |
| H | -1.962061000 | -1.231249000 | 0.684072000  |

<sup>3</sup>PC<sub>R11</sub>

|    |              |              |              |
|----|--------------|--------------|--------------|
| Cu | 2.264984000  | 0.237999000  | -0.190776000 |
| C  | 0.442419000  | 0.108918000  | 2.321042000  |
| H  | -0.225284000 | 0.664420000  | 1.670022000  |
| C  | 0.134298000  | -0.142737000 | 3.657148000  |
| H  | -0.796546000 | 0.222999000  | 4.077005000  |
| C  | 1.046457000  | -0.861751000 | 4.427877000  |
| H  | 0.844695000  | -1.068694000 | 5.474692000  |
| C  | 2.229544000  | -1.311124000 | 3.837958000  |
| H  | 2.960953000  | -1.872473000 | 4.411657000  |
| C  | 2.459982000  | -1.030589000 | 2.491876000  |
| C  | 3.682383000  | -1.550482000 | 1.753807000  |
| H  | 4.484794000  | -1.799052000 | 2.464643000  |
| H  | 3.405234000  | -2.482482000 | 1.246658000  |
| C  | 4.879738000  | 0.542837000  | 1.267772000  |
| H  | 5.936956000  | 0.298848000  | 1.451683000  |
| H  | 4.434890000  | 0.780181000  | 2.241748000  |
| C  | 4.762606000  | 1.770617000  | 0.379062000  |
| C  | 5.769270000  | 2.731680000  | 0.293461000  |
| H  | 6.704689000  | 2.593915000  | 0.827633000  |
| C  | 5.548161000  | 3.869895000  | -0.484639000 |
| H  | 6.316284000  | 4.633310000  | -0.565690000 |
| C  | 4.334825000  | 4.010057000  | -1.158169000 |
| H  | 4.127677000  | 4.879039000  | -1.773600000 |
| C  | 3.384421000  | 2.998253000  | -1.033815000 |

|   |              |              |              |
|---|--------------|--------------|--------------|
| C | 4.859401000  | -1.271841000 | -0.385956000 |
| H | 5.620598000  | -1.974000000 | -0.013062000 |
| H | 5.393659000  | -0.491545000 | -0.941759000 |
| C | 3.916393000  | -1.974937000 | -1.347819000 |
| C | 4.306984000  | -3.112712000 | -2.053249000 |
| H | 5.281094000  | -3.557978000 | -1.873719000 |
| C | 3.431282000  | -3.658598000 | -2.992926000 |
| H | 3.714834000  | -4.542418000 | -3.556747000 |
| C | 2.191391000  | -3.054174000 | -3.192782000 |
| H | 1.482135000  | -3.444571000 | -3.914847000 |
| C | 1.866859000  | -1.929147000 | -2.436489000 |
| N | 1.578861000  | -0.325898000 | 1.756277000  |
| N | 4.139782000  | -0.608296000 | 0.715511000  |
| N | 3.599581000  | 1.909360000  | -0.281913000 |
| N | 2.710623000  | -1.403806000 | -1.533345000 |
| O | 0.777375000  | 1.240469000  | -0.857679000 |
| O | -0.079021000 | 0.439800000  | -1.632968000 |
| H | 2.420840000  | 3.031492000  | -1.534695000 |
| H | 0.917658000  | -1.412640000 | -2.538069000 |
| C | -5.797038000 | 1.142247000  | -0.240373000 |
| C | -4.420860000 | 1.280233000  | -0.264452000 |
| C | -3.588363000 | 0.072690000  | -0.117265000 |
| C | -4.241923000 | -1.241796000 | 0.033026000  |
| C | -5.614274000 | -1.290546000 | 0.040788000  |
| C | -6.400604000 | -0.121133000 | -0.090252000 |
| H | -6.428353000 | 2.013427000  | -0.340112000 |
| H | -6.155812000 | -2.222084000 | 0.146412000  |
| O | -2.324542000 | 0.156726000  | -0.105820000 |
| H | -0.875389000 | 0.345787000  | -1.053236000 |
| C | -3.398877000 | -2.521617000 | 0.176299000  |
| C | -2.501781000 | -2.712946000 | -1.072585000 |
| C | -2.520681000 | -2.434885000 | 1.449242000  |
| C | -4.282469000 | -3.779420000 | 0.306889000  |
| H | -3.109130000 | -2.782345000 | -1.982596000 |
| H | -1.795922000 | -1.889542000 | -1.188958000 |
| H | -1.934571000 | -3.647078000 | -0.977464000 |
| H | -3.144300000 | -2.329325000 | 2.345129000  |
| H | -1.934396000 | -3.355768000 | 1.557586000  |
| H | -1.835359000 | -1.587951000 | 1.399607000  |

|   |              |              |              |
|---|--------------|--------------|--------------|
| H | -3.640148000 | -4.660966000 | 0.407011000  |
| H | -4.926752000 | -3.742758000 | 1.192599000  |
| H | -4.914851000 | -3.933742000 | -0.574689000 |
| C | -3.773341000 | 2.662959000  | -0.460536000 |
| C | -2.807901000 | 2.989147000  | 0.707325000  |
| C | -3.005764000 | 2.688542000  | -1.807099000 |
| C | -4.825820000 | 3.791307000  | -0.508666000 |
| H | -3.332615000 | 2.953420000  | 1.669852000  |
| H | -1.969577000 | 2.293189000  | 0.737136000  |
| H | -2.411839000 | 4.003516000  | 0.580502000  |
| H | -3.685335000 | 2.495581000  | -2.645444000 |
| H | -2.561970000 | 3.679879000  | -1.957682000 |
| H | -2.202381000 | 1.952179000  | -1.837258000 |
| H | -4.314477000 | 4.751061000  | -0.636042000 |
| H | -5.517907000 | 3.681078000  | -1.351548000 |
| H | -5.410226000 | 3.852615000  | 0.417039000  |
| O | -7.728304000 | -0.329355000 | -0.060553000 |
| C | -8.627126000 | 0.774001000  | -0.194589000 |
| H | -8.491454000 | 1.276393000  | -1.158660000 |
| H | -9.626955000 | 0.342825000  | -0.143410000 |
| H | -8.493524000 | 1.491949000  | 0.622200000  |

<sup>3</sup>PC<sub>R1</sub>

|    |             |              |              |
|----|-------------|--------------|--------------|
| Cu | 3.016533000 | -0.095109000 | -0.450017000 |
| C  | 3.398357000 | 2.572999000  | -2.024000000 |
| H  | 2.834317000 | 2.023973000  | -2.771798000 |
| C  | 3.874859000 | 3.863573000  | -2.241551000 |
| H  | 3.692150000 | 4.358843000  | -3.189239000 |
| C  | 4.588727000 | 4.490486000  | -1.220015000 |
| H  | 4.983039000 | 5.493007000  | -1.356841000 |
| C  | 4.792823000 | 3.814228000  | -0.016177000 |
| H  | 5.341608000 | 4.277414000  | 0.798199000  |
| C  | 4.270901000 | 2.529350000  | 0.130144000  |
| C  | 4.355429000 | 1.756458000  | 1.432963000  |
| H  | 5.225966000 | 2.077204000  | 2.023298000  |
| H  | 3.462622000 | 1.983362000  | 2.027380000  |
| C  | 5.692220000 | -0.197584000 | 0.782442000  |
| H  | 6.381784000 | -0.279992000 | 1.635398000  |
| H  | 6.116162000 | 0.544714000  | 0.095205000  |

|   |              |              |              |
|---|--------------|--------------|--------------|
| C | 5.577027000  | -1.525543000 | 0.059164000  |
| C | 6.572320000  | -2.498761000 | 0.131602000  |
| H | 7.452971000  | -2.332799000 | 0.744662000  |
| C | 6.413531000  | -3.682184000 | -0.591001000 |
| H | 7.175462000  | -4.454854000 | -0.550681000 |
| C | 5.258751000  | -3.860256000 | -1.351169000 |
| H | 5.089400000  | -4.769951000 | -1.917309000 |
| C | 4.305628000  | -2.843820000 | -1.365877000 |
| H | 3.379899000  | -2.922038000 | -1.926662000 |
| C | 3.812320000  | -0.459293000 | 2.353330000  |
| H | 4.271831000  | -0.137254000 | 3.298571000  |
| H | 4.081312000  | -1.511255000 | 2.204210000  |
| C | 2.302566000  | -0.339692000 | 2.420153000  |
| C | 1.635414000  | -0.311923000 | 3.629174000  |
| H | 2.180787000  | -0.318519000 | 4.566727000  |
| C | 0.224746000  | -0.292590000 | 3.599465000  |
| H | -0.337269000 | -0.282386000 | 4.529009000  |
| C | -0.439485000 | -0.281802000 | 2.396294000  |
| H | -1.522423000 | -0.262860000 | 2.339654000  |
| C | 0.312096000  | -0.280282000 | 1.183971000  |
| N | 3.597963000  | 1.925036000  | -0.866418000 |
| N | 4.366096000  | 0.296369000  | 1.203726000  |
| N | 4.465101000  | -1.698879000 | -0.683265000 |
| N | 1.670893000  | -0.319591000 | 1.221249000  |
| N | -0.291864000 | -0.236470000 | -0.013138000 |
| H | 0.282575000  | -0.230061000 | -0.857673000 |
| O | 1.830369000  | -0.150315000 | -1.956050000 |
| O | 1.815132000  | -1.427648000 | -2.602840000 |
| H | -1.305391000 | -0.190251000 | -0.079219000 |
| C | -7.283482000 | 0.175415000  | -0.154385000 |
| C | -6.512317000 | 1.359500000  | -0.078836000 |
| C | -5.139087000 | 1.328306000  | -0.063204000 |
| C | -4.468414000 | 0.014504000  | -0.120363000 |
| C | -5.286484000 | -1.207568000 | -0.222715000 |
| C | -6.664193000 | -1.087267000 | -0.231126000 |
| H | -7.065964000 | 2.289026000  | -0.036595000 |
| H | -7.283056000 | -1.970692000 | -0.300141000 |
| O | -3.208125000 | -0.061228000 | -0.088007000 |
| H | 2.279473000  | -1.225863000 | -3.436144000 |

|   |               |              |              |
|---|---------------|--------------|--------------|
| C | -4.609791000  | -2.585815000 | -0.323696000 |
| C | -3.716544000  | -2.641859000 | -1.589369000 |
| C | -3.753804000  | -2.853067000 | 0.940484000  |
| C | -5.638511000  | -3.730543000 | -0.432271000 |
| H | -4.315680000  | -2.491035000 | -2.495199000 |
| H | -2.935517000  | -1.881330000 | -1.559678000 |
| H | -3.241711000  | -3.627640000 | -1.662463000 |
| H | -4.372420000  | -2.819672000 | 1.845356000  |
| H | -3.306109000  | -3.852135000 | 0.878147000  |
| H | -2.952201000  | -2.120838000 | 1.039334000  |
| H | -5.106199000  | -4.684485000 | -0.509498000 |
| H | -6.287055000  | -3.790585000 | 0.449536000  |
| H | -6.269783000  | -3.637612000 | -1.323654000 |
| C | -4.310654000  | 2.623086000  | 0.006600000  |
| C | -3.448088000  | 2.633473000  | 1.293807000  |
| C | -3.399096000  | 2.736172000  | -1.241347000 |
| C | -5.209199000  | 3.876656000  | 0.041426000  |
| H | -4.079259000  | 2.555356000  | 2.186968000  |
| H | -2.732343000  | 1.810667000  | 1.299521000  |
| H | -2.892407000  | 3.576982000  | 1.359137000  |
| H | -3.997519000  | 2.759935000  | -2.159616000 |
| H | -2.823205000  | 3.668388000  | -1.193663000 |
| H | -2.702178000  | 1.899298000  | -1.303375000 |
| H | -4.577718000  | 4.770628000  | 0.082964000  |
| H | -5.836550000  | 3.959691000  | -0.853136000 |
| H | -5.860133000  | 3.894587000  | 0.923031000  |
| O | -8.615827000  | 0.369744000  | -0.154080000 |
| C | -9.496617000  | -0.751186000 | -0.240093000 |
| H | -9.343122000  | -1.302266000 | -1.174652000 |
| H | -9.363622000  | -1.424041000 | 0.614350000  |
| H | -10.503378000 | -0.333173000 | -0.223111000 |

<sup>3</sup>PC<sub>R2</sub>

|    |              |              |              |
|----|--------------|--------------|--------------|
| Cu | -3.006164000 | 0.033126000  | -0.410397000 |
| C  | -3.288490000 | -2.487023000 | -2.276872000 |
| H  | -2.793433000 | -1.827481000 | -2.982079000 |
| C  | -3.709216000 | -3.770769000 | -2.619130000 |
| H  | -3.545498000 | -4.146731000 | -3.623394000 |
| C  | -4.346791000 | -4.545236000 | -1.649785000 |

|   |              |              |              |
|---|--------------|--------------|--------------|
| H | -4.696105000 | -5.546262000 | -1.884840000 |
| C | -4.538793000 | -4.017338000 | -0.371706000 |
| H | -5.036796000 | -4.593592000 | 0.402245000  |
| C | -4.075071000 | -2.730432000 | -0.103118000 |
| C | -4.166629000 | -2.092937000 | 1.269893000  |
| H | -5.007037000 | -2.509401000 | 1.843157000  |
| H | -3.250161000 | -2.321910000 | 1.825547000  |
| C | -5.627238000 | -0.170283000 | 0.805560000  |
| H | -6.318507000 | -0.265283000 | 1.655008000  |
| H | -5.985840000 | -0.840337000 | 0.015115000  |
| C | -5.611492000 | 1.251512000  | 0.284311000  |
| C | -6.671131000 | 2.115762000  | 0.492379000  |
| H | -7.532020000 | 1.808499000  | 1.075911000  |
| C | -6.595157000 | 3.398178000  | -0.080385000 |
| H | -7.409829000 | 4.103777000  | 0.053620000  |
| C | -5.482885000 | 3.761578000  | -0.808174000 |
| H | -5.398498000 | 4.746978000  | -1.255216000 |
| C | -4.424417000 | 2.830152000  | -0.967556000 |
| C | -3.756845000 | 0.062363000  | 2.387093000  |
| H | -4.199801000 | -0.366588000 | 3.296869000  |
| H | -4.083111000 | 1.106498000  | 2.328470000  |
| C | -2.245206000 | 0.015582000  | 2.453807000  |
| C | -1.593699000 | -0.009725000 | 3.671395000  |
| H | -2.154926000 | -0.052297000 | 4.598533000  |
| C | -0.185615000 | 0.039764000  | 3.667346000  |
| H | 0.362809000  | 0.037095000  | 4.604945000  |
| C | 0.492715000  | 0.077536000  | 2.473037000  |
| H | 1.576084000  | 0.101588000  | 2.428429000  |
| C | -0.241181000 | 0.061145000  | 1.251858000  |
| N | -3.467348000 | -1.987687000 | -1.045196000 |
| N | -4.265568000 | -0.618827000 | 1.174800000  |
| N | -4.508340000 | 1.592865000  | -0.422899000 |
| N | -1.599934000 | 0.053819000  | 1.258813000  |
| N | 0.404615000  | 0.053507000  | 0.072638000  |
| H | -0.107453000 | -0.066403000 | -0.799424000 |
| O | -2.280811000 | 0.587312000  | -2.091621000 |
| O | -1.036852000 | -0.067275000 | -2.446652000 |
| H | 1.421614000  | 0.026006000  | 0.059307000  |
| N | -3.286711000 | 3.151341000  | -1.632434000 |

|   |              |              |              |
|---|--------------|--------------|--------------|
| H | -2.677037000 | 2.381351000  | -1.921857000 |
| H | -3.283707000 | 3.989161000  | -2.195429000 |
| C | 5.428418000  | -1.037860000 | 0.046999000  |
| C | 6.789628000  | -0.882058000 | -0.141214000 |
| C | 7.350022000  | 0.390001000  | -0.366978000 |
| C | 6.533935000  | 1.545098000  | -0.414403000 |
| C | 5.173263000  | 1.477981000  | -0.238797000 |
| C | 4.564890000  | 0.156748000  | 0.011826000  |
| H | 7.440964000  | -1.744003000 | -0.116906000 |
| H | 7.043153000  | 2.482841000  | -0.597491000 |
| O | 3.319466000  | 0.046622000  | 0.197746000  |
| H | -0.541215000 | 0.676919000  | -2.835202000 |
| C | 4.816807000  | -2.428946000 | 0.288672000  |
| C | 4.120799000  | -2.469313000 | 1.672825000  |
| C | 3.793113000  | -2.758929000 | -0.827733000 |
| C | 5.884774000  | -3.542669000 | 0.277189000  |
| H | 4.835820000  | -2.254540000 | 2.475825000  |
| H | 3.307751000  | -1.744732000 | 1.728409000  |
| H | 3.709502000  | -3.470414000 | 1.849746000  |
| H | 4.275738000  | -2.755694000 | -1.812258000 |
| H | 3.378108000  | -3.760466000 | -0.662303000 |
| H | 2.972144000  | -2.041050000 | -0.840960000 |
| H | 5.397481000  | -4.508339000 | 0.448373000  |
| H | 6.406145000  | -3.607819000 | -0.685010000 |
| H | 6.631417000  | -3.411245000 | 1.069190000  |
| C | 4.298803000  | 2.742508000  | -0.301200000 |
| C | 3.265765000  | 2.613792000  | -1.449192000 |
| C | 3.567839000  | 2.952486000  | 1.048539000  |
| C | 5.137701000  | 4.008103000  | -0.574942000 |
| H | 3.769991000  | 2.488029000  | -2.414675000 |
| H | 2.599607000  | 1.764463000  | -1.291026000 |
| H | 2.659992000  | 3.526576000  | -1.503295000 |
| H | 4.288244000  | 3.068988000  | 1.866712000  |
| H | 2.962990000  | 3.866181000  | 1.003168000  |
| H | 2.911190000  | 2.113482000  | 1.281204000  |
| H | 4.473243000  | 4.877930000  | -0.614235000 |
| H | 5.873946000  | 4.194716000  | 0.215011000  |
| H | 5.665496000  | 3.955497000  | -1.534042000 |
| O | 8.661946000  | 0.619988000  | -0.555939000 |

|   |              |              |              |
|---|--------------|--------------|--------------|
| C | 9.587388000  | -0.468115000 | -0.532963000 |
| H | 9.364947000  | -1.191316000 | -1.325506000 |
| H | 10.566275000 | -0.021887000 | -0.709195000 |
| H | 9.582057000  | -0.969668000 | 0.441239000  |

**<sup>3</sup>PC<sub>R3</sub>**

|    |              |              |              |
|----|--------------|--------------|--------------|
| Cu | -3.006164000 | 0.033126000  | -0.410397000 |
| C  | -3.288490000 | -2.487023000 | -2.276872000 |
| H  | -2.793433000 | -1.827481000 | -2.982079000 |
| C  | -3.709216000 | -3.770769000 | -2.619130000 |
| H  | -3.545498000 | -4.146731000 | -3.623394000 |
| C  | -4.346791000 | -4.545236000 | -1.649785000 |
| H  | -4.696105000 | -5.546262000 | -1.884840000 |
| C  | -4.538793000 | -4.017338000 | -0.371706000 |
| H  | -5.036796000 | -4.593592000 | 0.402245000  |
| C  | -4.075071000 | -2.730432000 | -0.103118000 |
| C  | -4.166629000 | -2.092937000 | 1.269893000  |
| H  | -5.007037000 | -2.509401000 | 1.843157000  |
| H  | -3.250161000 | -2.321910000 | 1.825547000  |
| C  | -5.627238000 | -0.170283000 | 0.805560000  |
| H  | -6.318507000 | -0.265283000 | 1.655008000  |
| H  | -5.985840000 | -0.840337000 | 0.015115000  |
| C  | -5.611492000 | 1.251512000  | 0.284311000  |
| C  | -6.671131000 | 2.115762000  | 0.492379000  |
| H  | -7.532020000 | 1.808499000  | 1.075911000  |
| C  | -6.595157000 | 3.398178000  | -0.080385000 |
| H  | -7.409829000 | 4.103777000  | 0.053620000  |
| C  | -5.482885000 | 3.761578000  | -0.808174000 |
| H  | -5.398498000 | 4.746978000  | -1.255216000 |
| C  | -4.424417000 | 2.830152000  | -0.967556000 |
| C  | -3.756845000 | 0.062363000  | 2.387093000  |
| H  | -4.199801000 | -0.366588000 | 3.296869000  |
| H  | -4.083111000 | 1.106498000  | 2.328470000  |
| C  | -2.245206000 | 0.015582000  | 2.453807000  |
| C  | -1.593699000 | -0.009725000 | 3.671395000  |
| H  | -2.154926000 | -0.052297000 | 4.598533000  |
| C  | -0.185615000 | 0.039764000  | 3.667346000  |
| H  | 0.362809000  | 0.037095000  | 4.604945000  |
| C  | 0.492715000  | 0.077536000  | 2.473037000  |



|   |              |              |              |
|---|--------------|--------------|--------------|
| H | 1.576084000  | 0.101588000  | 2.428429000  |
| C | -0.241181000 | 0.061145000  | 1.251858000  |
| N | -3.467348000 | -1.987687000 | -1.045196000 |
| N | -4.265568000 | -0.618827000 | 1.174800000  |
| N | -4.508340000 | 1.592865000  | -0.422899000 |
| N | -1.599934000 | 0.053819000  | 1.258813000  |
| N | 0.404615000  | 0.053507000  | 0.072638000  |
| H | -0.107453000 | -0.066403000 | -0.799424000 |
| O | -2.280811000 | 0.587312000  | -2.091621000 |
| O | -1.036852000 | -0.067275000 | -2.446652000 |
| H | 1.421614000  | 0.026006000  | 0.059307000  |
| N | -3.286711000 | 3.151341000  | -1.632434000 |
| H | -2.677037000 | 2.381351000  | -1.921857000 |
| H | -3.283707000 | 3.989161000  | -2.195429000 |
| C | 5.428418000  | -1.037860000 | 0.046999000  |
| C | 6.789628000  | -0.882058000 | -0.141214000 |
| C | 7.350022000  | 0.390001000  | -0.366978000 |
| C | 6.533935000  | 1.545098000  | -0.414403000 |
| C | 5.173263000  | 1.477981000  | -0.238797000 |
| C | 4.564890000  | 0.156748000  | 0.011826000  |
| H | 7.440964000  | -1.744003000 | -0.116906000 |
| H | 7.043153000  | 2.482841000  | -0.597491000 |
| O | 3.319466000  | 0.046622000  | 0.197746000  |
| H | -0.541215000 | 0.676919000  | -2.835202000 |
| C | 4.816807000  | -2.428946000 | 0.288672000  |
| C | 4.120799000  | -2.469313000 | 1.672825000  |
| C | 3.793113000  | -2.758929000 | -0.827733000 |
| C | 5.884774000  | -3.542669000 | 0.277189000  |
| H | 4.835820000  | -2.254540000 | 2.475825000  |
| H | 3.307751000  | -1.744732000 | 1.728409000  |
| H | 3.709502000  | -3.470414000 | 1.849746000  |
| H | 4.275738000  | -2.755694000 | -1.812258000 |
| H | 3.378108000  | -3.760466000 | -0.662303000 |
| H | 2.972144000  | -2.041050000 | -0.840960000 |
| H | 5.397481000  | -4.508339000 | 0.448373000  |
| H | 6.406145000  | -3.607819000 | -0.685010000 |
| H | 6.631417000  | -3.411245000 | 1.069190000  |
| C | 4.298803000  | 2.742508000  | -0.301200000 |
| C | 3.265765000  | 2.613792000  | -1.449192000 |

|   |              |              |              |
|---|--------------|--------------|--------------|
| C | 3.567839000  | 2.952486000  | 1.048539000  |
| C | 5.137701000  | 4.008103000  | -0.574942000 |
| H | 3.769991000  | 2.488029000  | -2.414675000 |
| H | 2.599607000  | 1.764463000  | -1.291026000 |
| H | 2.659992000  | 3.526576000  | -1.503295000 |
| H | 4.288244000  | 3.068988000  | 1.866712000  |
| H | 2.962990000  | 3.866181000  | 1.003168000  |
| H | 2.911190000  | 2.113482000  | 1.281204000  |
| H | 4.473243000  | 4.877930000  | -0.614235000 |
| H | 5.873946000  | 4.194716000  | 0.215011000  |
| H | 5.665496000  | 3.955497000  | -1.534042000 |
| O | 8.661946000  | 0.619988000  | -0.555939000 |
| C | 9.587388000  | -0.468115000 | -0.532963000 |
| H | 9.364947000  | -1.191316000 | -1.325506000 |
| H | 10.566275000 | -0.021887000 | -0.709195000 |
| H | 9.582057000  | -0.969668000 | 0.441239000  |

**<sup>3</sup>PC<sub>R4</sub>**

|    |             |              |              |
|----|-------------|--------------|--------------|
| Cu | 2.057647000 | -0.857705000 | -0.302309000 |
| C  | 2.229746000 | -0.022566000 | -3.282337000 |
| H  | 1.197899000 | 0.259549000  | -3.093783000 |
| C  | 2.817262000 | 0.091634000  | -4.540396000 |
| H  | 2.242169000 | 0.473780000  | -5.376963000 |
| C  | 4.146874000 | -0.302507000 | -4.692665000 |
| H  | 4.634867000 | -0.235958000 | -5.660508000 |
| C  | 4.845821000 | -0.788629000 | -3.586497000 |
| H  | 5.881607000 | -1.102551000 | -3.674510000 |
| C  | 4.191981000 | -0.859845000 | -2.356861000 |
| C  | 4.898012000 | -1.286239000 | -1.080890000 |
| H  | 5.748104000 | -1.946201000 | -1.308292000 |
| H  | 5.308487000 | -0.389900000 | -0.601312000 |
| C  | 3.656579000 | -3.312836000 | -0.455313000 |
| H  | 4.463483000 | -3.992485000 | -0.143015000 |
| H  | 3.586716000 | -3.379438000 | -1.547941000 |
| C  | 2.330171000 | -3.749570000 | 0.141438000  |
| C  | 2.072118000 | -5.072749000 | 0.495471000  |
| H  | 2.848018000 | -5.825888000 | 0.396417000  |
| C  | 0.803570000 | -5.406826000 | 0.972920000  |
| H  | 0.577500000 | -6.431624000 | 1.252182000  |

|   |              |              |              |
|---|--------------|--------------|--------------|
| C | -0.162081000 | -4.408275000 | 1.093087000  |
| H | -1.158912000 | -4.624119000 | 1.461647000  |
| C | 0.176420000  | -3.105413000 | 0.733659000  |
| H | -0.522354000 | -2.279755000 | 0.819564000  |
| C | 4.405171000  | -1.751564000 | 1.284708000  |
| H | 5.454418000  | -2.055599000 | 1.413117000  |
| H | 3.796621000  | -2.433969000 | 1.889426000  |
| C | 4.198590000  | -0.337567000 | 1.797015000  |
| C | 5.095801000  | 0.233506000  | 2.689850000  |
| H | 5.993025000  | -0.297367000 | 2.990355000  |
| C | 4.786176000  | 1.494078000  | 3.215449000  |
| H | 5.437751000  | 1.957171000  | 3.950649000  |
| C | 3.628896000  | 2.137032000  | 2.814037000  |
| H | 3.338436000  | 3.085218000  | 3.247949000  |
| C | 2.797576000  | 1.524416000  | 1.851675000  |
| C | 1.150850000  | 3.428554000  | 1.412126000  |
| N | 2.906124000  | -0.488698000 | -2.221782000 |
| N | 3.966890000  | -1.908397000 | -0.118011000 |
| N | 1.393688000  | -2.789614000 | 0.266356000  |
| N | 3.081883000  | 0.291235000  | 1.375038000  |
| N | 1.622367000  | 2.097337000  | 1.406472000  |
| H | 0.851422000  | 1.442065000  | 1.232428000  |
| O | -0.041705000 | 3.590787000  | 1.604375000  |
| C | 2.039348000  | 4.635852000  | 1.007877000  |
| C | 1.218764000  | 5.389076000  | -0.071668000 |
| H | 0.230127000  | 5.654068000  | 0.306678000  |
| H | 1.749169000  | 6.302546000  | -0.362073000 |
| H | 1.087483000  | 4.772021000  | -0.968321000 |
| C | 3.408705000  | 4.284265000  | 0.397392000  |
| H | 4.124577000  | 3.897430000  | 1.126170000  |
| H | 3.309525000  | 3.550630000  | -0.411000000 |
| H | 3.848138000  | 5.191320000  | -0.032269000 |
| C | 2.198424000  | 5.568448000  | 2.230179000  |
| H | 1.220356000  | 5.811374000  | 2.655815000  |
| H | 2.814536000  | 5.125203000  | 3.021374000  |
| H | 2.683562000  | 6.501869000  | 1.923523000  |
| O | 0.471205000  | 0.099912000  | -0.664447000 |
| O | -0.264278000 | 0.117293000  | 0.555677000  |
| C | -6.443041000 | -0.457829000 | 0.416694000  |

|   |              |              |              |
|---|--------------|--------------|--------------|
| C | -6.784245000 | 0.507331000  | -0.550654000 |
| C | -5.783426000 | 1.166358000  | -1.302634000 |
| C | -4.446750000 | 0.901122000  | -1.127017000 |
| C | -4.067337000 | -0.113581000 | -0.125688000 |
| C | -5.121987000 | -0.789234000 | 0.652116000  |
| H | -7.231285000 | -0.938957000 | 0.978079000  |
| H | -6.131530000 | 1.894599000  | -2.023843000 |
| O | -2.855970000 | -0.423653000 | 0.072830000  |
| H | -1.200353000 | -0.032422000 | 0.260677000  |
| C | -4.747161000 | -1.841689000 | 1.711155000  |
| C | -4.017076000 | -3.029643000 | 1.034137000  |
| C | -3.841820000 | -1.204253000 | 2.796642000  |
| C | -5.988745000 | -2.413643000 | 2.426190000  |
| H | -4.669600000 | -3.523797000 | 0.304711000  |
| H | -3.114729000 | -2.697308000 | 0.518847000  |
| H | -3.745307000 | -3.773118000 | 1.794747000  |
| H | -4.359941000 | -0.379678000 | 3.299816000  |
| H | -3.594316000 | -1.954609000 | 3.557520000  |
| H | -2.915331000 | -0.817511000 | 2.371021000  |
| H | -5.666947000 | -3.152032000 | 3.168394000  |
| H | -6.551139000 | -1.639655000 | 2.960720000  |
| H | -6.668680000 | -2.923705000 | 1.733855000  |
| C | -3.376976000 | 1.647068000  | -1.943030000 |
| C | -2.506536000 | 2.507985000  | -0.992913000 |
| C | -2.499406000 | 0.640518000  | -2.730829000 |
| C | -4.009614000 | 2.603292000  | -2.976216000 |
| H | -3.116676000 | 3.268663000  | -0.492993000 |
| H | -2.009692000 | 1.917469000  | -0.224162000 |
| H | -1.732998000 | 3.028336000  | -1.570274000 |
| H | -3.117529000 | 0.030481000  | -3.400864000 |
| H | -1.782659000 | 1.193740000  | -3.350785000 |
| H | -1.941363000 | -0.023670000 | -2.071286000 |
| H | -3.210817000 | 3.105696000  | -3.532156000 |
| H | -4.634629000 | 2.073001000  | -3.704018000 |
| H | -4.614929000 | 3.384288000  | -2.502712000 |
| O | -8.043094000 | 0.880958000  | -0.839567000 |
| C | -9.140643000 | 0.293066000  | -0.138392000 |
| H | -9.181180000 | -0.788968000 | -0.306262000 |
| H | -9.078494000 | 0.501719000  | 0.935421000  |

H -10.034360000 0.761217000 -0.551174000

<sup>3</sup>PC<sub>R6</sub>

Cu -1.291144000 -0.195133000 -0.112224000  
C -1.588673000 -3.255307000 0.218243000  
H -0.635940000 -3.223918000 -0.303061000  
C -2.224854000 -4.449188000 0.553319000  
H -1.768353000 -5.399681000 0.298474000  
C -3.454848000 -4.386901000 1.207852000  
H -3.984580000 -5.296390000 1.475418000  
C -4.004659000 -3.139659000 1.510482000  
H -4.962767000 -3.060256000 2.015378000  
C -3.299431000 -1.990300000 1.155499000  
C -3.779688000 -0.592851000 1.511947000  
H -4.869024000 -0.586951000 1.668703000  
H -3.319031000 -0.304777000 2.464712000  
C -4.180802000 0.352443000 -0.720270000  
H -5.131104000 0.894870000 -0.601117000  
H -4.434958000 -0.699593000 -0.898190000  
C -3.422779000 0.870209000 -1.931777000  
C -4.075706000 1.489504000 -2.997287000  
H -5.145918000 1.668624000 -2.952044000  
C -3.332436000 1.866197000 -4.117102000  
H -3.819177000 2.347407000 -4.960290000  
C -1.960394000 1.620230000 -4.132885000  
H -1.346512000 1.898449000 -4.982992000  
C -1.378212000 1.010627000 -3.022482000  
C -3.244002000 1.763466000 1.058217000  
H -4.118917000 2.039616000 1.666463000  
H -3.216350000 2.455760000 0.208305000  
C -1.963509000 1.945767000 1.855685000  
C -1.896580000 2.803846000 2.952157000  
H -2.789273000 3.315218000 3.299805000  
C -0.666630000 2.996588000 3.584154000  
H -0.588905000 3.662267000 4.438743000  
C 0.453752000 2.322309000 3.102466000  
H 1.429343000 2.447309000 3.559822000  
C 0.303792000 1.467489000 2.010937000  
N -2.117236000 -2.060044000 0.517450000

|   |              |              |              |
|---|--------------|--------------|--------------|
| N | -3.364638000 | 0.402517000  | 0.505849000  |
| N | -2.095609000 | 0.644760000  | -1.948292000 |
| N | -0.880044000 | 1.283927000  | 1.405026000  |
| O | 0.406660000  | -0.963898000 | -0.516141000 |
| O | 1.105904000  | -0.131491000 | -1.409141000 |
| H | -0.315183000 | 0.797646000  | -2.963826000 |
| H | 1.146322000  | 0.924189000  | 1.595206000  |
| C | 5.746693000  | -1.001316000 | -1.212729000 |
| C | 4.474114000  | -0.542686000 | -1.010608000 |
| C | 4.193246000  | 0.448954000  | 0.009885000  |
| C | 5.312709000  | 0.921499000  | 0.795847000  |
| C | 6.590244000  | 0.456277000  | 0.585706000  |
| C | 6.825431000  | -0.511469000 | -0.422893000 |
| H | 5.973423000  | -1.743124000 | -1.972097000 |
| H | 3.640655000  | -0.906863000 | -1.603314000 |
| H | 5.105890000  | 1.665844000  | 1.558290000  |
| H | 7.409167000  | 0.831658000  | 1.188504000  |
| O | 3.024121000  | 0.896481000  | 0.213960000  |
| H | 1.781452000  | 0.299322000  | -0.813868000 |
| O | 8.024934000  | -1.031312000 | -0.714024000 |
| C | 9.183069000  | -0.610175000 | 0.015071000  |
| H | 10.014038000 | -1.172784000 | -0.409891000 |
| H | 9.357648000  | 0.463142000  | -0.116270000 |
| H | 9.081861000  | -0.847791000 | 1.079575000  |

<sup>3</sup>PC<sub>R7</sub>

|    |              |              |              |
|----|--------------|--------------|--------------|
| Cu | -1.296300000 | -0.017347000 | -0.189134000 |
| C  | -1.843947000 | -0.286205000 | -3.230722000 |
| H  | -0.778359000 | -0.497587000 | -3.217604000 |
| C  | -2.587473000 | -0.215376000 | -4.407016000 |
| H  | -2.105992000 | -0.374754000 | -5.365961000 |
| C  | -3.950127000 | 0.069675000  | -4.317317000 |
| H  | -4.559583000 | 0.140904000  | -5.213388000 |
| C  | -4.524502000 | 0.267298000  | -3.060486000 |
| H  | -5.582145000 | 0.491710000  | -2.958961000 |
| C  | -3.715719000 | 0.166958000  | -1.928691000 |
| C  | -4.267985000 | 0.278211000  | -0.518160000 |
| H  | -5.187777000 | 0.881677000  | -0.507202000 |
| H  | -4.542424000 | -0.726693000 | -0.176908000 |

|   |              |              |              |
|---|--------------|--------------|--------------|
| C | -3.126935000 | 2.268222000  | 0.348069000  |
| H | -3.935459000 | 2.777704000  | 0.894448000  |
| H | -3.225550000 | 2.552743000  | -0.706842000 |
| C | -1.771974000 | 2.737260000  | 0.845198000  |
| C | -1.593704000 | 3.993273000  | 1.423654000  |
| H | -2.446623000 | 4.646152000  | 1.583176000  |
| C | -0.306192000 | 4.391525000  | 1.785395000  |
| H | -0.141039000 | 5.365108000  | 2.237427000  |
| C | 0.758546000  | 3.520490000  | 1.561300000  |
| H | 1.774916000  | 3.789205000  | 1.828488000  |
| C | 0.499547000  | 2.276696000  | 0.987797000  |
| H | 1.296984000  | 1.565977000  | 0.798510000  |
| C | -3.455393000 | 0.323001000  | 1.805426000  |
| H | -4.481379000 | 0.507657000  | 2.156752000  |
| H | -2.783137000 | 0.906371000  | 2.445459000  |
| C | -3.109899000 | -1.146023000 | 1.936144000  |
| C | -3.871401000 | -1.981708000 | 2.734301000  |
| H | -4.748097000 | -1.605414000 | 3.250128000  |
| C | -3.470819000 | -3.323929000 | 2.857885000  |
| H | -4.037797000 | -4.009738000 | 3.480703000  |
| C | -2.357023000 | -3.765180000 | 2.180772000  |
| H | -2.024718000 | -4.796125000 | 2.252595000  |
| C | -1.632005000 | -2.854829000 | 1.364846000  |
| N | -2.400895000 | -0.097780000 | -2.025942000 |
| N | -3.259929000 | 0.802697000  | 0.423340000  |
| N | -0.740900000 | 1.895181000  | 0.643043000  |
| N | -2.012441000 | -1.558636000 | 1.254617000  |
| N | -0.559339000 | -3.270848000 | 0.651538000  |
| H | 0.092153000  | -2.588736000 | 0.256606000  |
| O | 0.361568000  | -0.374342000 | -1.075742000 |
| O | 1.192636000  | -1.303673000 | -0.409973000 |
| H | -0.202472000 | -4.199079000 | 0.822217000  |
| C | 6.940262000  | -0.462823000 | -0.487670000 |
| C | 6.690557000  | 0.445413000  | 0.571924000  |
| C | 5.398023000  | 0.662455000  | 0.989710000  |
| C | 4.277405000  | -0.016711000 | 0.375984000  |
| C | 4.572668000  | -0.934536000 | -0.707134000 |
| C | 5.860049000  | -1.144221000 | -1.117987000 |
| H | 7.510071000  | 0.966033000  | 1.054010000  |

|   |              |              |              |
|---|--------------|--------------|--------------|
| H | 5.179344000  | 1.348241000  | 1.802101000  |
| H | 3.738840000  | -1.444037000 | -1.180457000 |
| H | 6.098080000  | -1.827326000 | -1.927269000 |
| O | 3.093579000  | 0.189853000  | 0.783386000  |
| H | 1.858527000  | -0.726360000 | 0.060211000  |
| O | 8.153698000  | -0.752226000 | -0.972640000 |
| C | 9.316670000  | -0.128521000 | -0.415671000 |
| H | 9.424521000  | -0.381252000 | 0.644447000  |
| H | 10.158739000 | -0.531485000 | -0.977608000 |
| H | 9.273992000  | 0.958496000  | -0.541919000 |

<sup>3</sup>PC<sub>R8</sub>

|    |              |              |              |
|----|--------------|--------------|--------------|
| Cu | 1.356129000  | 0.031186000  | -0.171026000 |
| C  | 1.300127000  | 2.239781000  | -2.382816000 |
| H  | 0.236103000  | 2.034785000  | -2.312627000 |
| C  | 1.838236000  | 3.140203000  | -3.299646000 |
| H  | 1.187397000  | 3.681274000  | -3.978164000 |
| C  | 3.222134000  | 3.316190000  | -3.327492000 |
| H  | 3.677058000  | 4.003000000  | -4.035135000 |
| C  | 4.020662000  | 2.592322000  | -2.440458000 |
| H  | 5.101116000  | 2.701097000  | -2.444378000 |
| C  | 3.404124000  | 1.722289000  | -1.542051000 |
| C  | 4.175260000  | 0.947353000  | -0.489511000 |
| H  | 5.208270000  | 0.762563000  | -0.819072000 |
| H  | 4.232584000  | 1.557713000  | 0.418761000  |
| C  | 3.716923000  | -1.382744000 | -1.126895000 |
| H  | 4.733896000  | -1.794393000 | -1.048265000 |
| H  | 3.625778000  | -0.925924000 | -2.119800000 |
| C  | 2.685194000  | -2.484026000 | -0.990397000 |
| C  | 2.999648000  | -3.810097000 | -1.227760000 |
| H  | 4.011601000  | -4.103022000 | -1.484873000 |
| C  | 1.965812000  | -4.759362000 | -1.126345000 |
| H  | 2.171290000  | -5.809951000 | -1.310558000 |
| C  | 0.692608000  | -4.356435000 | -0.789183000 |
| H  | -0.121034000 | -5.069796000 | -0.702925000 |
| C  | 0.441430000  | -2.979671000 | -0.546295000 |
| C  | 3.793039000  | -0.751230000 | 1.247294000  |
| H  | 4.876846000  | -0.770074000 | 1.431792000  |
| H  | 3.429566000  | -1.779966000 | 1.346803000  |



|                               |               |              |              |
|-------------------------------|---------------|--------------|--------------|
| C                             | 3.097172000   | 0.121551000  | 2.271475000  |
| C                             | 3.690640000   | 0.378032000  | 3.494905000  |
| H                             | 4.679920000   | -0.005114000 | 3.720069000  |
| C                             | 2.969168000   | 1.137385000  | 4.432870000  |
| H                             | 3.395109000   | 1.350900000  | 5.408904000  |
| C                             | 1.723678000   | 1.620230000  | 4.103504000  |
| H                             | 1.148164000   | 2.220086000  | 4.801543000  |
| C                             | 1.188124000   | 1.344145000  | 2.816350000  |
| N                             | 2.070561000   | 1.557133000  | -1.524463000 |
| N                             | 3.491924000   | -0.313179000 | -0.131377000 |
| N                             | 1.441861000   | -2.069325000 | -0.650542000 |
| N                             | 1.870102000   | 0.583313000  | 1.923929000  |
| N                             | -0.005124000  | 1.852564000  | 2.444909000  |
| H                             | -0.432564000  | 1.626738000  | 1.542243000  |
| O                             | -0.477314000  | 0.213447000  | -0.719422000 |
| O                             | -1.272261000  | 1.193847000  | -0.039230000 |
| H                             | -0.551086000  | 2.372488000  | 3.114098000  |
| N                             | -0.778972000  | -2.530205000 | -0.176576000 |
| H                             | -0.959825000  | -1.525003000 | -0.263184000 |
| H                             | -1.565964000  | -3.160093000 | -0.215949000 |
| C                             | -5.547188000  | -0.847930000 | 1.057970000  |
| C                             | -6.841252000  | -0.594483000 | 0.666866000  |
| C                             | -7.094053000  | 0.391932000  | -0.318724000 |
| C                             | -6.015207000  | 1.117829000  | -0.901084000 |
| C                             | -4.725429000  | 0.872296000  | -0.515815000 |
| C                             | -4.425794000  | -0.131322000 | 0.488984000  |
| H                             | -7.659615000  | -1.146890000 | 1.114340000  |
| H                             | -6.255885000  | 1.862194000  | -1.653487000 |
| O                             | -3.243344000  | -0.381210000 | 0.872637000  |
| H                             | -2.008154000  | 0.605808000  | 0.301211000  |
| O                             | -8.310401000  | 0.717699000  | -0.773808000 |
| C                             | -9.469160000  | 0.052393000  | -0.256813000 |
| H                             | -9.571457000  | 0.226454000  | 0.819389000  |
| H                             | -10.315516000 | 0.492239000  | -0.783504000 |
| H                             | -9.424829000  | -1.022920000 | -0.462042000 |
| H                             | -3.892991000  | 1.415182000  | -0.954464000 |
| H                             | -5.324796000  | -1.595921000 | 1.812854000  |
| <sup>3</sup> PC <sub>R9</sub> |               |              |              |
| Cu                            | -1.574784000  | -0.357911000 | -0.153634000 |

|   |              |              |              |
|---|--------------|--------------|--------------|
| C | -0.286506000 | -1.951826000 | 2.190814000  |
| H | 0.444754000  | -2.202583000 | 1.426960000  |
| C | -0.224764000 | -2.484651000 | 3.477766000  |
| H | 0.573985000  | -3.169302000 | 3.742087000  |
| C | -1.209145000 | -2.127113000 | 4.398152000  |
| H | -1.195602000 | -2.530006000 | 5.406570000  |
| C | -2.222200000 | -1.249073000 | 4.006921000  |
| H | -3.005545000 | -0.956205000 | 4.699604000  |
| C | -2.211519000 | -0.749684000 | 2.705675000  |
| C | -3.229765000 | 0.265431000  | 2.213675000  |
| H | -4.153638000 | 0.207658000  | 2.807973000  |
| H | -2.816752000 | 1.270403000  | 2.358564000  |
| C | -4.380629000 | -1.042811000 | 0.480014000  |
| H | -5.438953000 | -0.798312000 | 0.654309000  |
| H | -4.115913000 | -1.841495000 | 1.183149000  |
| C | -4.174411000 | -1.559005000 | -0.932416000 |
| C | -5.205473000 | -2.144677000 | -1.664522000 |
| H | -6.208713000 | -2.193174000 | -1.251842000 |
| C | -4.921756000 | -2.669324000 | -2.926794000 |
| H | -5.707791000 | -3.131595000 | -3.516511000 |
| C | -3.619250000 | -2.588876000 | -3.416161000 |
| H | -3.356298000 | -2.986284000 | -4.390638000 |
| C | -2.644077000 | -1.978861000 | -2.628461000 |
| H | -1.608593000 | -1.895463000 | -2.941569000 |
| C | -3.982661000 | 1.348182000  | 0.132952000  |
| H | -4.803303000 | 1.803768000  | 0.707269000  |
| H | -4.396079000 | 1.068841000  | -0.843575000 |
| C | -2.877146000 | 2.365311000  | -0.093207000 |
| C | -3.173099000 | 3.721841000  | -0.163466000 |
| H | -4.181641000 | 4.078475000  | 0.018030000  |
| C | -2.144448000 | 4.599668000  | -0.517491000 |
| H | -2.344889000 | 5.660372000  | -0.636321000 |
| C | -0.867439000 | 4.109003000  | -0.738587000 |
| H | -0.070408000 | 4.762944000  | -1.063325000 |
| C | -0.620544000 | 2.734558000  | -0.562938000 |
| C | 1.961022000  | 2.527073000  | -0.627761000 |
| N | -1.259484000 | -1.103928000 | 1.821864000  |
| N | -3.501894000 | 0.107951000  | 0.769665000  |
| N | -2.919611000 | -1.471818000 | -1.415940000 |

|   |              |              |              |
|---|--------------|--------------|--------------|
| N | -1.634024000 | 1.880641000  | -0.280343000 |
| N | 0.615887000  | 2.137790000  | -0.746093000 |
| H | 0.556899000  | 1.157362000  | -1.063754000 |
| O | 2.774338000  | 1.820734000  | -1.208415000 |
| C | 2.457096000  | 3.690425000  | 0.272078000  |
| C | 3.820296000  | 3.231811000  | 0.845908000  |
| H | 4.524132000  | 2.994751000  | 0.046484000  |
| H | 4.241044000  | 4.032846000  | 1.463103000  |
| H | 3.706000000  | 2.340978000  | 1.473432000  |
| C | 1.536423000  | 4.016625000  | 1.464990000  |
| H | 0.598517000  | 4.495789000  | 1.179568000  |
| H | 1.298646000  | 3.113885000  | 2.039760000  |
| H | 2.057654000  | 4.706605000  | 2.137465000  |
| C | 2.715252000  | 4.940016000  | -0.604300000 |
| H | 3.386896000  | 4.695812000  | -1.433450000 |
| H | 1.801616000  | 5.369184000  | -1.027627000 |
| H | 3.190060000  | 5.719411000  | 0.002095000  |
| O | 0.177120000  | -0.580585000 | -0.854763000 |
| O | 0.298917000  | -1.637715000 | -1.777256000 |
| C | 5.485126000  | -3.203128000 | 0.177765000  |
| C | 5.811365000  | -1.892984000 | -0.276415000 |
| C | 4.791816000  | -1.017689000 | -0.723962000 |
| C | 3.483098000  | -1.441316000 | -0.731519000 |
| C | 3.115489000  | -2.767346000 | -0.281112000 |
| C | 4.185025000  | -3.628996000 | 0.181533000  |
| H | 6.298259000  | -3.840220000 | 0.511439000  |
| H | 5.019010000  | -0.011545000 | -1.056877000 |
| H | 2.702427000  | -0.769194000 | -1.068631000 |
| H | 3.915521000  | -4.625431000 | 0.517184000  |
| O | 1.909708000  | -3.172039000 | -0.277186000 |
| H | 0.842266000  | -2.288541000 | -1.241187000 |
| O | 7.115678000  | -1.586291000 | -0.236276000 |
| C | 7.556536000  | -0.303042000 | -0.691620000 |
| H | 8.639673000  | -0.308174000 | -0.571116000 |
| H | 7.301050000  | -0.154465000 | -1.746099000 |
| H | 7.119979000  | 0.497779000  | -0.085103000 |

<sup>3</sup>PC<sub>R10</sub>

|    |              |              |              |
|----|--------------|--------------|--------------|
| Cu | -1.535603000 | -0.210926000 | -0.151613000 |
|----|--------------|--------------|--------------|

|   |              |              |              |
|---|--------------|--------------|--------------|
| C | -3.960615000 | -0.358543000 | 1.818769000  |
| H | -3.144712000 | -0.529300000 | 2.515158000  |
| C | -5.298256000 | -0.392318000 | 2.208692000  |
| H | -5.557779000 | -0.592493000 | 3.242818000  |
| C | -6.279866000 | -0.173858000 | 1.242321000  |
| H | -7.332770000 | -0.201117000 | 1.507002000  |
| C | -5.892349000 | 0.072334000  | -0.075850000 |
| H | -6.631766000 | 0.240092000  | -0.853319000 |
| C | -4.532283000 | 0.101625000  | -0.383219000 |
| C | -4.021427000 | 0.428157000  | -1.774484000 |
| H | -4.790453000 | 0.202652000  | -2.529603000 |
| H | -3.829008000 | 1.506362000  | -1.829921000 |
| C | -2.954739000 | -1.690172000 | -2.349863000 |
| H | -3.316819000 | -1.849352000 | -3.377814000 |
| H | -3.745289000 | -2.048599000 | -1.679442000 |
| C | -1.713437000 | -2.529919000 | -2.102521000 |
| C | -1.557343000 | -3.737481000 | -2.775572000 |
| H | -2.276086000 | -4.040723000 | -3.530172000 |
| C | -0.461141000 | -4.541492000 | -2.454162000 |
| H | -0.297607000 | -5.483393000 | -2.969424000 |
| C | 0.436990000  | -4.103593000 | -1.494883000 |
| H | 1.329347000  | -4.671225000 | -1.258892000 |
| C | 0.212956000  | -2.872040000 | -0.849670000 |
| C | -1.955896000 | 0.418232000  | -3.089196000 |
| H | -2.550036000 | 0.646698000  | -3.987706000 |
| H | -1.158499000 | -0.268791000 | -3.395933000 |
| C | -1.313870000 | 1.679884000  | -2.546961000 |
| C | -1.186797000 | 2.828017000  | -3.326429000 |
| H | -1.597642000 | 2.854676000  | -4.330698000 |
| C | -0.508257000 | 3.926021000  | -2.795881000 |
| H | -0.373525000 | 4.828114000  | -3.385140000 |
| C | 0.016284000  | 3.840651000  | -1.510610000 |
| H | 0.588755000  | 4.652222000  | -1.078852000 |
| C | -0.184045000 | 2.666511000  | -0.775441000 |
| C | 0.052004000  | 2.832266000  | 1.774980000  |
| N | -3.591057000 | -0.114276000 | 0.552740000  |
| N | -2.753197000 | -0.264446000 | -2.060524000 |
| N | -0.851362000 | -2.098541000 | -1.157621000 |
| N | -0.837271000 | 1.608627000  | -1.288372000 |

|   |              |              |              |
|---|--------------|--------------|--------------|
| N | 0.406919000  | 2.460561000  | 0.489764000  |
| H | 1.044372000  | 1.652305000  | 0.465859000  |
| O | 0.607617000  | 2.232899000  | 2.699694000  |
| C | -0.945491000 | 3.971724000  | 2.078645000  |
| C | -1.316095000 | 3.872909000  | 3.572760000  |
| H | -0.432457000 | 3.953643000  | 4.208922000  |
| H | -2.008932000 | 4.682309000  | 3.827663000  |
| H | -1.800953000 | 2.918004000  | 3.798640000  |
| C | -2.243091000 | 3.867037000  | 1.246887000  |
| H | -2.091659000 | 4.078452000  | 0.185456000  |
| H | -2.696582000 | 2.873887000  | 1.342702000  |
| H | -2.964540000 | 4.601094000  | 1.622409000  |
| C | -0.250356000 | 5.332271000  | 1.833530000  |
| H | 0.679418000  | 5.406711000  | 2.407316000  |
| H | -0.018787000 | 5.501766000  | 0.778345000  |
| H | -0.912501000 | 6.142105000  | 2.159457000  |
| O | -1.030665000 | -0.248039000 | 1.719241000  |
| O | 0.299142000  | -0.388105000 | 2.078478000  |
| N | 1.117809000  | -2.389680000 | 0.084508000  |
| H | 1.451537000  | -1.423300000 | -0.026339000 |
| C | 1.842654000  | -3.111824000 | 1.044974000  |
| C | 1.174353000  | -4.210598000 | 1.912239000  |
| C | 1.881775000  | -5.557535000 | 1.645745000  |
| H | 2.965884000  | -5.450606000 | 1.747436000  |
| H | 1.540528000  | -6.306346000 | 2.369267000  |
| H | 1.663824000  | -5.945881000 | 0.643611000  |
| C | -0.350319000 | -4.349481000 | 1.748369000  |
| H | -0.850186000 | -3.379171000 | 1.841469000  |
| H | -0.640656000 | -4.804542000 | 0.797315000  |
| H | -0.732120000 | -5.000173000 | 2.543099000  |
| C | 1.457813000  | -3.777856000 | 3.375469000  |
| H | 0.981747000  | -2.816008000 | 3.594706000  |
| H | 1.053233000  | -4.530252000 | 4.061610000  |
| H | 2.530803000  | -3.677710000 | 3.550376000  |
| O | 2.991094000  | -2.769330000 | 1.288232000  |
| C | 3.937065000  | 1.977622000  | -0.750795000 |
| C | 3.491160000  | 0.649082000  | -0.379781000 |
| C | 4.511568000  | -0.350619000 | -0.146951000 |
| C | 5.848125000  | -0.052471000 | -0.284305000 |

|   |             |              |              |
|---|-------------|--------------|--------------|
| C | 6.246339000 | 1.252731000  | -0.663091000 |
| C | 5.267464000 | 2.261755000  | -0.892114000 |
| H | 3.181239000 | 2.737831000  | -0.921745000 |
| H | 4.179258000 | -1.331404000 | 0.181099000  |
| H | 6.590363000 | -0.818599000 | -0.090707000 |
| H | 5.617147000 | 3.249490000  | -1.175838000 |
| O | 2.254768000 | 0.374508000  | -0.262657000 |
| H | 0.535460000 | 0.521755000  | 2.409958000  |
| O | 7.515783000 | 1.647011000  | -0.828366000 |
| C | 8.584335000 | 0.717860000  | -0.613228000 |
| H | 8.509804000 | -0.128754000 | -1.303968000 |
| H | 9.498791000 | 1.276318000  | -0.811653000 |
| H | 8.586300000 | 0.359496000  | 0.421572000  |

<sup>3</sup>PC<sub>R11</sub>

|    |              |              |              |
|----|--------------|--------------|--------------|
| Cu | -0.758620000 | 0.011960000  | -0.228732000 |
| C  | -1.289940000 | -1.509812000 | -2.863626000 |
| H  | -0.335885000 | -1.052945000 | -3.111391000 |
| C  | -2.014182000 | -2.280776000 | -3.770770000 |
| H  | -1.629505000 | -2.449453000 | -4.770925000 |
| C  | -3.236919000 | -2.814385000 | -3.363640000 |
| H  | -3.833122000 | -3.412328000 | -4.046540000 |
| C  | -3.692196000 | -2.566501000 | -2.067181000 |
| H  | -4.641495000 | -2.966161000 | -1.723329000 |
| C  | -2.902622000 | -1.797160000 | -1.213347000 |
| C  | -3.276422000 | -1.542607000 | 0.237874000  |
| H  | -4.363452000 | -1.638918000 | 0.379515000  |
| H  | -2.805292000 | -2.317009000 | 0.855394000  |
| C  | -3.590329000 | 0.893221000  | 0.232466000  |
| H  | -4.494441000 | 1.032376000  | 0.844355000  |
| H  | -3.927668000 | 0.645089000  | -0.781181000 |
| C  | -2.790520000 | 2.183561000  | 0.165722000  |
| C  | -3.389915000 | 3.428811000  | 0.352038000  |
| H  | -4.442607000 | 3.494685000  | 0.610574000  |
| C  | -2.616396000 | 4.579944000  | 0.194817000  |
| H  | -3.061232000 | 5.561144000  | 0.331818000  |
| C  | -1.268150000 | 4.449442000  | -0.134421000 |
| H  | -0.632099000 | 5.318526000  | -0.264871000 |
| C  | -0.738745000 | 3.169066000  | -0.287735000 |

|   |              |              |              |
|---|--------------|--------------|--------------|
| C | -2.549893000 | -0.203933000 | 2.168639000  |
| H | -3.401399000 | -0.625469000 | 2.723711000  |
| H | -2.471090000 | 0.850284000  | 2.459993000  |
| C | -1.259336000 | -0.901697000 | 2.564221000  |
| C | -1.122125000 | -1.561181000 | 3.784871000  |
| H | -1.968709000 | -1.641328000 | 4.460234000  |
| C | 0.117956000  | -2.107227000 | 4.121038000  |
| H | 0.249938000  | -2.623634000 | 5.067235000  |
| C | 1.178129000  | -1.982351000 | 3.224979000  |
| H | 2.158386000  | -2.389489000 | 3.448349000  |
| C | 0.958316000  | -1.323085000 | 2.016550000  |
| N | -1.728611000 | -1.279546000 | -1.617651000 |
| N | -2.774817000 | -0.238095000 | 0.711335000  |
| N | -1.485054000 | 2.062701000  | -0.140938000 |
| N | -0.234113000 | -0.796213000 | 1.696790000  |
| O | 0.886631000  | 0.000223000  | -1.193447000 |
| O | 1.633939000  | 1.153530000  | -0.878726000 |
| H | 0.303634000  | 2.993675000  | -0.534803000 |
| H | 1.748195000  | -1.197688000 | 1.283362000  |
| C | 6.226873000  | 0.633522000  | -1.893618000 |
| C | 4.982963000  | 0.627462000  | -1.303250000 |
| C | 4.810624000  | 0.095370000  | 0.035925000  |
| C | 5.981176000  | -0.423290000 | 0.716924000  |
| C | 7.212963000  | -0.403479000 | 0.102829000  |
| C | 7.346431000  | 0.122471000  | -1.201208000 |
| H | 6.354066000  | 1.031401000  | -2.896122000 |
| H | 4.101751000  | 1.008738000  | -1.810471000 |
| H | 5.841568000  | -0.815979000 | 1.719099000  |
| H | 8.088436000  | -0.789797000 | 0.616345000  |
| H | 8.322464000  | 0.133964000  | -1.677149000 |
| O | 3.678515000  | 0.081207000  | 0.605034000  |
| H | 2.338591000  | 0.789553000  | -0.280209000 |

<sup>3</sup>PC<sub>R12</sub>

|    |              |              |              |
|----|--------------|--------------|--------------|
| Cu | -0.755021000 | -0.009198000 | -0.179501000 |
| C  | -1.372206000 | -0.133247000 | -3.215695000 |
| H  | -0.317265000 | -0.392021000 | -3.233898000 |
| C  | -2.135274000 | 0.017879000  | -4.371667000 |
| H  | -1.681041000 | -0.124451000 | -5.346438000 |

|   |              |              |              |
|---|--------------|--------------|--------------|
| C | -3.481340000 | 0.360160000  | -4.241057000 |
| H | -4.104792000 | 0.494577000  | -5.120059000 |
| C | -4.020723000 | 0.533163000  | -2.965231000 |
| H | -5.064668000 | 0.800772000  | -2.831910000 |
| C | -3.194859000 | 0.351712000  | -1.856232000 |
| C | -3.712663000 | 0.432832000  | -0.430766000 |
| H | -4.600226000 | 1.080304000  | -0.375289000 |
| H | -4.030480000 | -0.570003000 | -0.122641000 |
| C | -2.461838000 | 2.329482000  | 0.494011000  |
| H | -3.235874000 | 2.849569000  | 1.078702000  |
| H | -2.567138000 | 2.664440000  | -0.545279000 |
| C | -1.077584000 | 2.712883000  | 0.983406000  |
| C | -0.827643000 | 3.932382000  | 1.611360000  |
| H | -1.644577000 | 4.617763000  | 1.816124000  |
| C | 0.484154000  | 4.252448000  | 1.963311000  |
| H | 0.704683000  | 5.196226000  | 2.453220000  |
| C | 1.501606000  | 3.342585000  | 1.680147000  |
| H | 2.534450000  | 3.551115000  | 1.937654000  |
| C | 1.171218000  | 2.139653000  | 1.058936000  |
| H | 1.927987000  | 1.400309000  | 0.820299000  |
| C | -2.851579000 | 0.339466000  | 1.873833000  |
| H | -3.861061000 | 0.555888000  | 2.253215000  |
| H | -2.140988000 | 0.863267000  | 2.523807000  |
| C | -2.572757000 | -1.147896000 | 1.934199000  |
| C | -3.357332000 | -1.981749000 | 2.711237000  |
| H | -4.205269000 | -1.588412000 | 3.261271000  |
| C | -3.018193000 | -3.345301000 | 2.768380000  |
| H | -3.604862000 | -4.030928000 | 3.372828000  |
| C | -1.939651000 | -3.807108000 | 2.049345000  |
| H | -1.654974000 | -4.854467000 | 2.069244000  |
| C | -1.188356000 | -2.896132000 | 1.258227000  |
| N | -1.895687000 | 0.031810000  | -1.992513000 |
| N | -2.660657000 | 0.868928000  | 0.508611000  |
| N | -0.092100000 | 1.832689000  | 0.724144000  |
| N | -1.508644000 | -1.579963000 | 1.212324000  |
| N | -0.150533000 | -3.330513000 | 0.505494000  |
| H | 0.522682000  | -2.664545000 | 0.121169000  |
| O | 0.869731000  | -0.393258000 | -1.114264000 |
| O | 1.669518000  | -1.403513000 | -0.526686000 |



|   |             |              |              |
|---|-------------|--------------|--------------|
| H | 0.162272000 | -4.282394000 | 0.624164000  |
| C | 7.423330000 | -0.662505000 | -0.967633000 |
| C | 7.285015000 | 0.162048000  | 0.170856000  |
| C | 6.041983000 | 0.375941000  | 0.722028000  |
| C | 4.864687000 | -0.242121000 | 0.143589000  |
| C | 5.042051000 | -1.083588000 | -1.025170000 |
| C | 6.297084000 | -1.278403000 | -1.556563000 |
| H | 8.408237000 | -0.825122000 | -1.395121000 |
| H | 8.165651000 | 0.623420000  | 0.607799000  |
| H | 5.898242000 | 0.999082000  | 1.599006000  |
| H | 4.156165000 | -1.540035000 | -1.456500000 |
| H | 6.428276000 | -1.907040000 | -2.432357000 |
| O | 3.721387000 | -0.046963000 | 0.655051000  |
| H | 2.373675000 | -0.888859000 | -0.049798000 |

<sup>3</sup>PC<sub>R14</sub>

|    |              |              |              |
|----|--------------|--------------|--------------|
| Cu | -1.233922000 | -0.298038000 | -0.116247000 |
| C  | -0.041356000 | -1.901275000 | 2.263321000  |
| H  | 0.661029000  | -2.219399000 | 1.498294000  |
| C  | -0.001379000 | -2.397259000 | 3.565165000  |
| H  | 0.751604000  | -3.125945000 | 3.845598000  |
| C  | -0.949554000 | -1.943743000 | 4.481976000  |
| H  | -0.952651000 | -2.314833000 | 5.502559000  |
| C  | -1.903363000 | -1.009993000 | 4.072052000  |
| H  | -2.656427000 | -0.641679000 | 4.762234000  |
| C  | -1.872386000 | -0.552659000 | 2.755504000  |
| C  | -2.819970000 | 0.517985000  | 2.240726000  |
| H  | -3.744305000 | 0.537805000  | 2.836506000  |
| H  | -2.338328000 | 1.495012000  | 2.362974000  |
| C  | -4.074877000 | -0.736099000 | 0.538533000  |
| H  | -5.109703000 | -0.404291000 | 0.709122000  |
| H  | -3.872477000 | -1.537446000 | 1.259282000  |
| C  | -3.915654000 | -1.296166000 | -0.863073000 |
| C  | -4.992078000 | -1.816214000 | -1.579103000 |
| H  | -5.993285000 | -1.782407000 | -1.160149000 |
| C  | -4.757379000 | -2.381367000 | -2.833999000 |
| H  | -5.579902000 | -2.793751000 | -3.410758000 |
| C  | -3.456576000 | -2.403881000 | -3.333545000 |
| H  | -3.231182000 | -2.833268000 | -4.303838000 |
| C  | -2.433160000 | -1.855336000 | -2.562293000 |

|   |              |              |              |
|---|--------------|--------------|--------------|
| H | -1.397156000 | -1.847981000 | -2.884958000 |
| C | -3.487701000 | 1.608925000  | 0.135845000  |
| H | -4.264329000 | 2.142950000  | 0.703524000  |
| H | -3.930176000 | 1.342511000  | -0.831420000 |
| C | -2.302583000 | 2.525780000  | -0.117169000 |
| C | -2.486601000 | 3.899160000  | -0.224960000 |
| H | -3.462036000 | 4.342836000  | -0.055027000 |
| C | -1.388327000 | 4.678175000  | -0.601444000 |
| H | -1.500177000 | 5.748100000  | -0.750325000 |
| C | -0.155667000 | 4.079219000  | -0.804774000 |
| H | 0.691215000  | 4.658410000  | -1.143560000 |
| C | -0.021061000 | 2.694074000  | -0.590734000 |
| C | 2.537047000  | 2.259532000  | -0.679570000 |
| N | -0.957149000 | -1.000403000 | 1.875819000  |
| N | -3.106007000 | 0.347716000  | 0.800406000  |
| N | -2.660754000 | -1.311895000 | -1.355454000 |
| N | -1.103904000 | 1.935357000  | -0.289132000 |
| N | 1.157649000  | 1.987337000  | -0.746812000 |
| H | 1.008375000  | 0.995640000  | -0.997050000 |
| O | 3.265056000  | 1.440565000  | -1.223238000 |
| C | 3.159633000  | 3.429484000  | 0.127250000  |
| C | 4.509325000  | 2.901826000  | 0.672242000  |
| H | 5.161657000  | 2.573382000  | -0.138383000 |
| H | 5.011068000  | 3.700254000  | 1.229351000  |
| H | 4.359011000  | 2.054393000  | 1.350021000  |
| C | 2.314893000  | 3.885164000  | 1.333776000  |
| H | 1.389428000  | 4.393424000  | 1.058376000  |
| H | 2.059067000  | 3.036577000  | 1.979109000  |
| H | 2.901973000  | 4.588831000  | 1.933903000  |
| C | 3.472757000  | 4.605959000  | -0.829097000 |
| H | 4.085325000  | 4.264041000  | -1.669315000 |
| H | 2.578443000  | 5.085772000  | -1.238839000 |
| H | 4.034845000  | 5.375040000  | -0.287860000 |
| O | 0.509303000  | -0.700962000 | -0.766561000 |
| O | 0.549994000  | -1.637693000 | -1.821432000 |
| C | 5.594053000  | -3.860568000 | -0.009085000 |
| C | 6.037223000  | -2.570918000 | -0.381708000 |
| C | 5.119828000  | -1.586361000 | -0.805382000 |
| C | 3.773124000  | -1.870003000 | -0.869453000 |

|   |             |              |              |
|---|-------------|--------------|--------------|
| C | 3.284357000 | -3.182717000 | -0.489928000 |
| C | 4.253873000 | -4.170037000 | -0.053949000 |
| H | 6.318192000 | -4.604077000 | 0.311246000  |
| H | 7.097211000 | -2.337336000 | -0.340971000 |
| H | 5.468983000 | -0.596120000 | -1.081419000 |
| H | 3.062329000 | -1.117027000 | -1.190939000 |
| H | 3.876565000 | -5.149898000 | 0.221557000  |
| O | 2.049703000 | -3.477112000 | -0.522794000 |
| H | 1.019608000 | -2.395697000 | -1.372025000 |

<sup>3</sup>PC<sub>R15</sub>

|    |              |              |              |
|----|--------------|--------------|--------------|
| Cu | -0.996582000 | -0.678384000 | -0.099404000 |
| C  | -2.967544000 | -1.757932000 | 2.076728000  |
| H  | -2.118620000 | -1.506008000 | 2.705694000  |
| C  | -4.120856000 | -2.357447000 | 2.579618000  |
| H  | -4.196552000 | -2.587868000 | 3.636979000  |
| C  | -5.156206000 | -2.657458000 | 1.694670000  |
| H  | -6.066126000 | -3.132993000 | 2.048601000  |
| C  | -5.005362000 | -2.347055000 | 0.342079000  |
| H  | -5.789733000 | -2.573883000 | -0.373893000 |
| C  | -3.825309000 | -1.735453000 | -0.080071000 |
| C  | -3.602906000 | -1.301128000 | -1.516877000 |
| H  | -4.237666000 | -1.886633000 | -2.199851000 |
| H  | -3.911927000 | -0.253498000 | -1.615196000 |
| C  | -1.746579000 | -2.765509000 | -2.121251000 |
| H  | -2.070634000 | -3.133496000 | -3.107397000 |
| H  | -2.246911000 | -3.390831000 | -1.371965000 |
| C  | -0.248031000 | -2.954639000 | -1.964152000 |
| C  | 0.383355000  | -4.004624000 | -2.622891000 |
| H  | -0.173845000 | -4.635851000 | -3.307689000 |
| C  | 1.741474000  | -4.222905000 | -2.379175000 |
| H  | 2.272146000  | -5.022184000 | -2.887980000 |
| C  | 2.412688000  | -3.381975000 | -1.506930000 |
| H  | 3.477612000  | -3.483494000 | -1.334383000 |
| C  | 1.707292000  | -2.342989000 | -0.869818000 |
| C  | -1.836663000 | -0.484989000 | -3.004081000 |
| H  | -2.528294000 | -0.600107000 | -3.852976000 |
| H  | -0.839731000 | -0.770412000 | -3.359686000 |
| C  | -1.788994000 | 0.962366000  | -2.556400000 |

|   |              |              |              |
|---|--------------|--------------|--------------|
| C | -2.239952000 | 1.994520000  | -3.376843000 |
| H | -2.681157000 | 1.771089000  | -4.342998000 |
| C | -2.096564000 | 3.311243000  | -2.937805000 |
| H | -2.418856000 | 4.138970000  | -3.562368000 |
| C | -1.512257000 | 3.550817000  | -1.698753000 |
| H | -1.341952000 | 4.558039000  | -1.339508000 |
| C | -1.115641000 | 2.460507000  | -0.916078000 |
| C | -0.826994000 | 2.873862000  | 1.603545000  |
| N | -2.828930000 | -1.453353000 | 0.777845000  |
| N | -2.179517000 | -1.381024000 | -1.890193000 |
| N | 0.393057000  | -2.134704000 | -1.103949000 |
| N | -1.251441000 | 1.191362000  | -1.341397000 |
| N | -0.420429000 | 2.624898000  | 0.302235000  |
| H | 0.509445000  | 2.189070000  | 0.257530000  |
| O | -0.004610000 | 2.642249000  | 2.493468000  |
| C | -2.208424000 | 3.465805000  | 1.956495000  |
| C | -2.404486000 | 3.301522000  | 3.477724000  |
| H | -1.609332000 | 3.797017000  | 4.038259000  |
| H | -3.365697000 | 3.739273000  | 3.768213000  |
| H | -2.403951000 | 2.245382000  | 3.765154000  |
| C | -3.368080000 | 2.744222000  | 1.234607000  |
| H | -3.392346000 | 2.937914000  | 0.159447000  |
| H | -3.318645000 | 1.660697000  | 1.392374000  |
| H | -4.318540000 | 3.099288000  | 1.647882000  |
| C | -2.210997000 | 4.975973000  | 1.619104000  |
| H | -1.384446000 | 5.491411000  | 2.119559000  |
| H | -2.135534000 | 5.166541000  | 0.544940000  |
| H | -3.147565000 | 5.424389000  | 1.968563000  |
| O | -0.409207000 | -0.357064000 | 1.716249000  |
| O | 0.867002000  | 0.131122000  | 1.947848000  |
| N | 2.362622000  | -1.463258000 | -0.020537000 |
| H | 2.220719000  | -0.458816000 | -0.169144000 |
| C | 3.411119000  | -1.733735000 | 0.874523000  |
| C | 3.379605000  | -2.965173000 | 1.815910000  |
| C | 4.603964000  | -3.856865000 | 1.514023000  |
| H | 5.523533000  | -3.264275000 | 1.516258000  |
| H | 4.694507000  | -4.635897000 | 2.279166000  |
| H | 4.518007000  | -4.359359000 | 0.543003000  |
| C | 2.079840000  | -3.790413000 | 1.789944000  |

|   |             |              |              |
|---|-------------|--------------|--------------|
| H | 1.199674000 | -3.150067000 | 1.914523000  |
| H | 1.960555000 | -4.377740000 | 0.875261000  |
| H | 2.097405000 | -4.500333000 | 2.624442000  |
| C | 3.534385000 | -2.367350000 | 3.240123000  |
| H | 2.688233000 | -1.714926000 | 3.481909000  |
| H | 3.566222000 | -3.180262000 | 3.973888000  |
| H | 4.452655000 | -1.782051000 | 3.318457000  |
| O | 4.295760000 | -0.899933000 | 1.001243000  |
| C | 2.952152000 | 3.761497000  | -0.956713000 |
| C | 3.168344000 | 2.360986000  | -0.644372000 |
| C | 4.535870000 | 1.889961000  | -0.537832000 |
| C | 5.585297000 | 2.759052000  | -0.747599000 |
| C | 5.341734000 | 4.110416000  | -1.067142000 |
| C | 4.020017000 | 4.602674000  | -1.166468000 |
| H | 1.927040000 | 4.111950000  | -1.025497000 |
| H | 4.682764000 | 0.854559000  | -0.245327000 |
| H | 6.608694000 | 2.406543000  | -0.658289000 |
| H | 6.177371000 | 4.784551000  | -1.230807000 |
| H | 3.855808000 | 5.649153000  | -1.406736000 |
| O | 2.187942000 | 1.572335000  | -0.472638000 |
| H | 0.692184000 | 1.064454000  | 2.249864000  |

**<sup>21</sup>b**

|    |              |              |              |
|----|--------------|--------------|--------------|
| Cu | 0.035422000  | -0.041972000 | -0.706418000 |
| C  | 2.818103000  | -1.280622000 | -1.252755000 |
| H  | 2.427452000  | -1.298350000 | -2.265450000 |
| C  | 4.067386000  | -1.800784000 | -0.923181000 |
| H  | 4.689201000  | -2.250228000 | -1.689945000 |
| C  | 4.487045000  | -1.733011000 | 0.405394000  |
| H  | 5.450485000  | -2.136906000 | 0.701621000  |
| C  | 3.652843000  | -1.138969000 | 1.354152000  |
| H  | 3.954141000  | -1.067684000 | 2.394885000  |
| C  | 2.422874000  | -0.626902000 | 0.942888000  |
| C  | 1.502055000  | 0.128786000  | 1.885256000  |
| H  | 1.676433000  | -0.177214000 | 2.927193000  |
| H  | 1.749804000  | 1.194979000  | 1.819735000  |
| C  | -0.489700000 | -1.311013000 | 1.919933000  |
| H  | -0.759789000 | -1.316904000 | 2.986247000  |
| H  | 0.291792000  | -2.068365000 | 1.783320000  |

|   |              |              |              |
|---|--------------|--------------|--------------|
| C | -1.685996000 | -1.689111000 | 1.065315000  |
| C | -2.759799000 | -2.415354000 | 1.577701000  |
| H | -2.777620000 | -2.694139000 | 2.626937000  |
| C | -3.803079000 | -2.774905000 | 0.722679000  |
| H | -4.648997000 | -3.341981000 | 1.099449000  |
| C | -3.746207000 | -2.385403000 | -0.614422000 |
| H | -4.540017000 | -2.634864000 | -1.310344000 |
| C | -2.644740000 | -1.650495000 | -1.048675000 |
| C | -0.738956000 | 1.139328000  | 1.938861000  |
| H | -0.520974000 | 1.422714000  | 2.978747000  |
| H | -1.788024000 | 0.822371000  | 1.907885000  |
| C | -0.573356000 | 2.330618000  | 1.009257000  |
| C | -0.702719000 | 3.647657000  | 1.447850000  |
| H | -0.870716000 | 3.862400000  | 2.498993000  |
| C | -0.617362000 | 4.678777000  | 0.509574000  |
| H | -0.717382000 | 5.713057000  | 0.825022000  |
| C | -0.396935000 | 4.364937000  | -0.831539000 |
| H | -0.322761000 | 5.139224000  | -1.587638000 |
| C | -0.263133000 | 3.024018000  | -1.187417000 |
| N | 2.017309000  | -0.712792000 | -0.338016000 |
| N | 0.081215000  | -0.013510000 | 1.506670000  |
| N | -1.634729000 | -1.316038000 | -0.229731000 |
| N | -0.352596000 | 2.037230000  | -0.284465000 |
| O | 0.268592000  | 0.103203000  | -2.593864000 |
| O | -0.898127000 | -0.263378000 | -3.315458000 |
| H | -2.546120000 | -1.300915000 | -2.071497000 |
| H | -0.077117000 | 2.703144000  | -2.208495000 |
| H | -0.609089000 | -1.081310000 | -3.762408000 |

**2b**

|    |              |             |              |
|----|--------------|-------------|--------------|
| Cu | -0.040435000 | 0.011175000 | 0.609439000  |
| C  | -0.925520000 | 2.877017000 | 1.393286000  |
| H  | -0.899206000 | 2.447203000 | 2.390552000  |
| C  | -1.338099000 | 4.186125000 | 1.154491000  |
| H  | -1.645799000 | 4.818519000 | 1.980251000  |
| C  | -1.352727000 | 4.650320000 | -0.160901000 |
| H  | -1.677094000 | 5.662030000 | -0.385295000 |
| C  | -0.951078000 | 3.797628000 | -1.191319000 |
| H  | -0.955139000 | 4.130740000 | -2.224713000 |

|   |              |              |              |
|---|--------------|--------------|--------------|
| C | -0.538256000 | 2.505303000  | -0.871438000 |
| C | -0.009403000 | 1.531722000  | -1.910934000 |
| H | -0.399654000 | 1.776614000  | -2.909129000 |
| H | 1.081245000  | 1.632426000  | -1.959128000 |
| C | -1.709263000 | -0.241435000 | -1.816841000 |
| H | -1.855936000 | -0.499174000 | -2.875815000 |
| H | -2.326524000 | 0.642247000  | -1.614845000 |
| C | -2.180335000 | -1.371888000 | -0.919238000 |
| C | -3.171894000 | -2.266037000 | -1.319598000 |
| H | -3.590355000 | -2.206104000 | -2.319806000 |
| C | -3.616384000 | -3.229318000 | -0.412450000 |
| H | -4.390254000 | -3.935044000 | -0.699239000 |
| C | -3.048970000 | -3.274433000 | 0.860155000  |
| H | -3.364600000 | -4.008433000 | 1.593813000  |
| C | -2.049826000 | -2.357055000 | 1.179681000  |
| H | -1.555864000 | -2.347049000 | 2.145562000  |
| C | 0.658384000  | -0.833576000 | -2.118478000 |
| H | 0.800469000  | -0.662754000 | -3.195143000 |
| H | 0.218660000  | -1.831555000 | -2.006235000 |
| C | 1.993318000  | -0.811036000 | -1.395628000 |
| C | 3.180420000  | -1.085141000 | -2.055301000 |
| H | 3.192070000  | -1.266160000 | -3.124681000 |
| C | 4.361034000  | -1.131875000 | -1.295968000 |
| H | 5.309695000  | -1.351393000 | -1.776728000 |
| C | 4.317693000  | -0.887711000 | 0.063090000  |
| H | 5.217677000  | -0.911598000 | 0.669206000  |
| C | 3.073468000  | -0.588670000 | 0.663917000  |
| N | -0.535507000 | 2.063084000  | 0.400676000  |
| N | -0.305369000 | 0.129951000  | -1.541126000 |
| N | -1.627900000 | -1.426115000 | 0.308201000  |
| N | 1.937407000  | -0.567440000 | -0.066552000 |
| N | 2.955735000  | -0.347092000 | 2.008365000  |
| H | 2.113614000  | 0.161074000  | 2.303234000  |
| O | 0.248668000  | 0.119103000  | 2.497025000  |
| O | 0.225654000  | -1.213736000 | 3.003327000  |
| H | 3.805593000  | -0.137584000 | 2.514665000  |
| H | 1.173498000  | -1.467377000 | 2.970811000  |

|    |              |              |              |
|----|--------------|--------------|--------------|
| Cu | -0.037427000 | 0.098489000  | 0.556051000  |
| C  | 1.040325000  | 2.972959000  | 1.198619000  |
| H  | 0.666129000  | 2.722027000  | 2.186554000  |
| C  | 1.593520000  | 4.216581000  | 0.906395000  |
| H  | 1.685688000  | 4.968689000  | 1.682578000  |
| C  | 2.006926000  | 4.468294000  | -0.402566000 |
| H  | 2.436737000  | 5.428816000  | -0.670280000 |
| C  | 1.846219000  | 3.476426000  | -1.371021000 |
| H  | 2.141799000  | 3.649397000  | -2.401298000 |
| C  | 1.293612000  | 2.252319000  | -0.995258000 |
| C  | 1.112343000  | 1.099688000  | -1.963119000 |
| H  | 1.005161000  | 1.467862000  | -2.993395000 |
| H  | 2.008139000  | 0.468708000  | -1.936528000 |
| C  | -1.338712000 | 0.872774000  | -1.913140000 |
| H  | -1.536166000 | 0.809849000  | -2.992579000 |
| H  | -1.271173000 | 1.935899000  | -1.654090000 |
| C  | -2.464636000 | 0.237399000  | -1.124020000 |
| C  | -3.731367000 | 0.085352000  | -1.656006000 |
| H  | -3.944310000 | 0.382207000  | -2.677035000 |
| C  | -4.730298000 | -0.461282000 | -0.828578000 |
| H  | -5.739921000 | -0.591222000 | -1.206994000 |
| C  | -4.425969000 | -0.834994000 | 0.461654000  |
| H  | -5.178175000 | -1.260535000 | 1.118199000  |
| C  | -3.099791000 | -0.665109000 | 0.940000000  |
| C  | 0.074230000  | -1.125900000 | -2.091851000 |
| H  | 0.275286000  | -1.128317000 | -3.172384000 |
| H  | -0.900156000 | -1.603678000 | -1.941928000 |
| C  | 1.130967000  | -1.916580000 | -1.353298000 |
| C  | 1.863203000  | -2.884985000 | -2.015431000 |
| H  | 1.728244000  | -3.047371000 | -3.079176000 |
| C  | 2.767927000  | -3.658327000 | -1.267294000 |
| H  | 3.352635000  | -4.437019000 | -1.747996000 |
| C  | 2.911753000  | -3.416660000 | 0.079034000  |
| H  | 3.606465000  | -3.989999000 | 0.684624000  |
| C  | 2.148214000  | -2.384748000 | 0.688445000  |
| N  | 0.908416000  | 2.012659000  | 0.271815000  |
| N  | -0.036456000 | 0.253247000  | -1.573317000 |
| N  | -2.143637000 | -0.132653000 | 0.139291000  |
| N  | 1.259430000  | -1.650476000 | -0.027174000 |



|   |              |              |             |
|---|--------------|--------------|-------------|
| N | 2.317558000  | -2.098615000 | 1.998817000 |
| H | 1.701853000  | -1.443208000 | 2.479793000 |
| O | -0.316358000 | 0.333401000  | 2.443091000 |
| O | 0.725489000  | -0.143896000 | 3.308272000 |
| H | 2.874137000  | -2.720312000 | 2.565472000 |
| N | -2.734679000 | -1.051327000 | 2.185054000 |
| H | -1.851532000 | -0.683663000 | 2.552237000 |
| H | -3.457159000 | -1.299577000 | 2.844637000 |
| H | 1.223440000  | 0.670116000  | 3.506403000 |

**<sup>24</sup>b**

|    |              |              |              |
|----|--------------|--------------|--------------|
| Cu | -0.746806000 | 0.042495000  | 0.415925000  |
| C  | -0.754836000 | 2.980130000  | 1.317826000  |
| H  | -0.287772000 | 2.534497000  | 2.191443000  |
| C  | -1.089230000 | 4.331062000  | 1.252118000  |
| H  | -0.876886000 | 4.984419000  | 2.091487000  |
| C  | -1.707151000 | 4.809864000  | 0.096900000  |
| H  | -1.990630000 | 5.854920000  | 0.015158000  |
| C  | -1.966915000 | 3.927981000  | -0.954083000 |
| H  | -2.452466000 | 4.270146000  | -1.863009000 |
| C  | -1.589509000 | 2.592912000  | -0.819342000 |
| C  | -1.757951000 | 1.578088000  | -1.935591000 |
| H  | -2.560972000 | 1.884064000  | -2.621961000 |
| H  | -0.830375000 | 1.552999000  | -2.520307000 |
| C  | -3.370308000 | -0.003137000 | -0.956774000 |
| H  | -4.045244000 | -0.195993000 | -1.803870000 |
| H  | -3.707993000 | 0.927492000  | -0.484708000 |
| C  | -3.461962000 | -1.122601000 | 0.066895000  |
| C  | -4.605479000 | -1.907932000 | 0.204914000  |
| H  | -5.446362000 | -1.774153000 | -0.469109000 |
| C  | -4.648949000 | -2.858292000 | 1.226778000  |
| H  | -5.529249000 | -3.480653000 | 1.356982000  |
| C  | -3.549490000 | -2.997496000 | 2.072975000  |
| H  | -3.546316000 | -3.722487000 | 2.879856000  |
| C  | -2.437133000 | -2.184457000 | 1.862025000  |
| H  | -1.549551000 | -2.243878000 | 2.484306000  |
| C  | -1.526692000 | -0.830610000 | -2.348842000 |
| H  | -1.882112000 | -0.637578000 | -3.371466000 |
| H  | -1.976947000 | -1.776421000 | -2.025776000 |

|   |              |              |              |
|---|--------------|--------------|--------------|
| C | -0.018886000 | -0.996953000 | -2.334378000 |
| C | 0.695630000  | -1.285776000 | -3.491682000 |
| H | 0.194019000  | -1.331995000 | -4.452644000 |
| C | 2.065042000  | -1.542338000 | -3.377005000 |
| H | 2.649698000  | -1.801152000 | -4.254604000 |
| C | 2.672363000  | -1.499903000 | -2.129401000 |
| H | 3.716213000  | -1.754660000 | -2.011628000 |
| C | 1.896008000  | -1.156321000 | -1.012619000 |
| C | 3.376100000  | -0.585386000 | 1.068020000  |
| N | -0.997668000 | 2.139183000  | 0.301011000  |
| N | -1.980057000 | 0.214456000  | -1.410041000 |
| N | -2.398085000 | -1.272311000 | 0.877867000  |
| N | 0.574168000  | -0.908759000 | -1.126607000 |
| N | 2.347186000  | -1.162845000 | 0.311727000  |
| H | 1.589714000  | -1.414129000 | 0.948353000  |
| O | 3.225785000  | -0.652946000 | 2.287502000  |
| C | 4.633589000  | 0.077548000  | 0.475428000  |
| C | 5.301764000  | 0.886704000  | 1.608364000  |
| H | 5.552210000  | 0.251842000  | 2.460284000  |
| H | 6.221164000  | 1.343835000  | 1.227571000  |
| H | 4.644812000  | 1.684487000  | 1.968802000  |
| C | 4.305415000  | 1.050901000  | -0.677986000 |
| H | 3.933943000  | 0.559902000  | -1.579135000 |
| H | 3.565524000  | 1.796688000  | -0.364105000 |
| H | 5.217422000  | 1.589857000  | -0.955715000 |
| C | 5.622345000  | -1.027848000 | 0.028968000  |
| H | 5.893213000  | -1.667337000 | 0.875365000  |
| H | 5.228233000  | -1.672523000 | -0.761629000 |
| H | 6.538798000  | -0.561909000 | -0.348725000 |
| O | 0.085182000  | 0.200773000  | 2.123831000  |
| O | 0.512750000  | -1.050628000 | 2.640000000  |
| H | 1.484158000  | -0.895145000 | 2.777525000  |

**<sup>25</sup>b**

|    |             |             |             |
|----|-------------|-------------|-------------|
| Cu | 0.506083000 | 0.759341000 | 0.307845000 |
| C  | 3.007924000 | 2.092814000 | 1.579268000 |
| H  | 2.676148000 | 1.497609000 | 2.425099000 |
| C  | 4.111456000 | 2.941339000 | 1.642727000 |
| H  | 4.680303000 | 3.023532000 | 2.562667000 |

|   |              |              |              |
|---|--------------|--------------|--------------|
| C | 4.452768000  | 3.678722000  | 0.509177000  |
| H | 5.301494000  | 4.355948000  | 0.525152000  |
| C | 3.683082000  | 3.544265000  | -0.647942000 |
| H | 3.918160000  | 4.110312000  | -1.544308000 |
| C | 2.601467000  | 2.665126000  | -0.636234000 |
| C | 1.744932000  | 2.405616000  | -1.861108000 |
| H | 1.781382000  | 3.263774000  | -2.549108000 |
| H | 2.157548000  | 1.545024000  | -2.401842000 |
| C | -0.407965000 | 3.241007000  | -1.036290000 |
| H | -0.742923000 | 3.854918000  | -1.887029000 |
| H | 0.270124000  | 3.866631000  | -0.444211000 |
| C | -1.603518000 | 2.859360000  | -0.174281000 |
| C | -2.661765000 | 3.745458000  | 0.033012000  |
| H | -2.665187000 | 4.721021000  | -0.443589000 |
| C | -3.694733000 | 3.357002000  | 0.885260000  |
| H | -4.509230000 | 4.040058000  | 1.106743000  |
| C | -3.680875000 | 2.078458000  | 1.442392000  |
| H | -4.464207000 | 1.743233000  | 2.110331000  |
| C | -2.626673000 | 1.220755000  | 1.124188000  |
| C | -0.328722000 | 1.281985000  | -2.529454000 |
| H | -0.134557000 | 1.687470000  | -3.533125000 |
| H | -1.405935000 | 1.372240000  | -2.352938000 |
| C | 0.020486000  | -0.198142000 | -2.483988000 |
| C | 0.027515000  | -0.973968000 | -3.642438000 |
| H | -0.127832000 | -0.510757000 | -4.611816000 |
| C | 0.210141000  | -2.352663000 | -3.526417000 |
| H | 0.195083000  | -2.985220000 | -4.408827000 |
| C | 0.384082000  | -2.911999000 | -2.263531000 |
| H | 0.477398000  | -3.981896000 | -2.124514000 |
| C | 0.413094000  | -2.067771000 | -1.149667000 |
| C | 1.572538000  | -2.868688000 | 0.990679000  |
| N | 2.277335000  | 1.958919000  | 0.462046000  |
| N | 0.359673000  | 2.063073000  | -1.485620000 |
| N | -1.581037000 | 1.637037000  | 0.381351000  |
| N | 0.233212000  | -0.737169000 | -1.266569000 |
| N | 0.498296000  | -2.571101000 | 0.169377000  |
| H | -0.373390000 | -2.444733000 | 0.699795000  |
| O | 1.341381000  | -2.952350000 | 2.199996000  |
| C | 2.986161000  | -3.157250000 | 0.443971000  |

|   |              |              |              |
|---|--------------|--------------|--------------|
| C | 3.949946000  | -3.195888000 | 1.646794000  |
| H | 3.650358000  | -3.954356000 | 2.372756000  |
| H | 4.961074000  | -3.426211000 | 1.294038000  |
| H | 3.974981000  | -2.232479000 | 2.165727000  |
| C | 3.476801000  | -2.073266000 | -0.542270000 |
| H | 2.944585000  | -2.087662000 | -1.496953000 |
| H | 3.388427000  | -1.070730000 | -0.107803000 |
| H | 4.535590000  | -2.249112000 | -0.761894000 |
| C | 2.984294000  | -4.546447000 | -0.237973000 |
| H | 2.624942000  | -5.320339000 | 0.448323000  |
| H | 2.363360000  | -4.570391000 | -1.138068000 |
| H | 4.006292000  | -4.807512000 | -0.534290000 |
| O | 0.955384000  | 0.085290000  | 2.045849000  |
| O | 0.020298000  | -0.676020000 | 2.750357000  |
| N | -2.556458000 | -0.117796000 | 1.588751000  |
| H | -1.674721000 | -0.319114000 | 2.079702000  |
| C | -2.959681000 | -1.272560000 | 0.909073000  |
| C | -4.268209000 | -1.332304000 | 0.088708000  |
| C | -4.237061000 | -0.364525000 | -1.118437000 |
| H | -3.360642000 | -0.551594000 | -1.751276000 |
| H | -5.128153000 | -0.534945000 | -1.732368000 |
| H | -4.239855000 | 0.688781000  | -0.827664000 |
| C | -5.474196000 | -1.020268000 | 1.004295000  |
| H | -5.494613000 | -1.690555000 | 1.870149000  |
| H | -5.469147000 | 0.008217000  | 1.371538000  |
| H | -6.403982000 | -1.168076000 | 0.443833000  |
| C | -4.418684000 | -2.769117000 | -0.449828000 |
| H | -4.440596000 | -3.499326000 | 0.362577000  |
| H | -5.353301000 | -2.847863000 | -1.015601000 |
| H | -3.590733000 | -3.037896000 | -1.112664000 |
| O | -2.269030000 | -2.279932000 | 1.050132000  |
| H | 0.406285000  | -1.597830000 | 2.699840000  |

**<sup>1</sup>Hc**

|    |             |              |              |
|----|-------------|--------------|--------------|
| Cu | 0.001600000 | -0.000685000 | -0.897309000 |
| C  | 2.871925000 | -1.014340000 | -1.476456000 |
| H  | 2.530360000 | -1.057751000 | -2.506126000 |
| C  | 4.139061000 | -1.470107000 | -1.123489000 |
| H  | 4.801834000 | -1.872884000 | -1.881932000 |

|   |              |              |              |
|---|--------------|--------------|--------------|
| C | 4.519664000  | -1.401899000 | 0.215713000  |
| H | 5.495568000  | -1.755436000 | 0.534378000  |
| C | 3.621452000  | -0.875568000 | 1.143951000  |
| H | 3.884302000  | -0.810007000 | 2.195506000  |
| C | 2.373794000  | -0.424487000 | 0.711807000  |
| C | 1.406282000  | 0.241466000  | 1.685803000  |
| H | 1.654426000  | -0.061329000 | 2.715301000  |
| H | 1.570855000  | 1.324846000  | 1.631058000  |
| C | -0.493907000 | -1.339455000 | 1.685813000  |
| H | -0.880909000 | -1.402036000 | 2.715078000  |
| H | 0.361172000  | -2.024732000 | 1.631853000  |
| C | -1.554595000 | -1.842918000 | 0.711109000  |
| C | -2.570859000 | -2.695672000 | 1.143112000  |
| H | -2.646043000 | -2.956192000 | 2.194613000  |
| C | -3.477234000 | -3.208070000 | 0.214966000  |
| H | -4.272892000 | -3.874550000 | 0.533838000  |
| C | -3.345401000 | -2.844481000 | -1.124169000 |
| H | -4.026780000 | -3.215052000 | -1.882528000 |
| C | -2.314922000 | -1.977407000 | -1.477087000 |
| C | -0.913402000 | 1.095308000  | 1.685339000  |
| H | -0.775877000 | 1.461722000  | 2.714899000  |
| H | -1.933500000 | 0.695179000  | 1.630296000  |
| C | -0.820614000 | 2.265946000  | 0.711211000  |
| C | -1.052203000 | 3.572062000  | 1.143757000  |
| H | -1.240159000 | 3.766888000  | 2.195371000  |
| C | -1.043985000 | 4.613489000  | 0.215984000  |
| H | -1.224727000 | 5.635444000  | 0.535171000  |
| C | -0.794247000 | 4.318296000  | -1.123159000 |
| H | -0.775190000 | 5.094009000  | -1.881187000 |
| C | -0.556835000 | 2.992798000  | -1.476578000 |
| N | 2.003652000  | -0.502050000 | -0.586090000 |
| N | 0.000196000  | -0.000824000 | 1.353191000  |
| N | -1.435782000 | -1.483768000 | -0.586906000 |
| N | -0.568632000 | 1.984155000  | -0.586850000 |
| H | -2.181164000 | -1.659786000 | -2.506648000 |
| H | -0.347552000 | 2.719165000  | -2.506180000 |

'2c

|    |             |              |              |
|----|-------------|--------------|--------------|
| Cu | 0.035980000 | -0.029753000 | -0.778407000 |
|----|-------------|--------------|--------------|

|   |              |              |              |
|---|--------------|--------------|--------------|
| C | 0.434955000  | 2.972735000  | -1.499481000 |
| H | 0.452870000  | 2.612485000  | -2.523534000 |
| C | 0.663005000  | 4.315272000  | -1.210467000 |
| H | 0.858831000  | 5.018110000  | -2.013210000 |
| C | 0.641126000  | 4.719405000  | 0.123450000  |
| H | 0.823201000  | 5.755334000  | 0.393030000  |
| C | 0.386730000  | 3.767294000  | 1.110122000  |
| H | 0.365570000  | 4.046910000  | 2.159211000  |
| C | 0.152274000  | 2.442104000  | 0.741027000  |
| C | -0.217299000 | 1.396005000  | 1.788064000  |
| H | 0.134040000  | 1.726057000  | 2.778349000  |
| H | -1.311958000 | 1.350923000  | 1.844854000  |
| C | 1.685562000  | -0.173442000 | 1.660468000  |
| H | 1.908147000  | -0.515725000 | 2.683471000  |
| H | 2.190392000  | 0.792996000  | 1.537822000  |
| C | 2.295577000  | -1.144411000 | 0.654216000  |
| C | 3.364746000  | -1.965116000 | 1.015656000  |
| H | 3.726137000  | -1.960062000 | 2.039608000  |
| C | 3.960080000  | -2.780436000 | 0.053621000  |
| H | 4.794208000  | -3.423469000 | 0.317590000  |
| C | 3.461303000  | -2.757685000 | -1.247841000 |
| H | 3.889596000  | -3.374478000 | -2.030700000 |
| C | 2.382209000  | -1.924593000 | -1.528742000 |
| C | -0.617700000 | -1.042677000 | 1.883515000  |
| H | -0.874357000 | -0.973722000 | 2.951961000  |
| H | -0.053600000 | -1.974494000 | 1.753004000  |
| C | -1.894503000 | -1.144519000 | 1.058157000  |
| C | -3.095486000 | -1.503622000 | 1.649266000  |
| H | -3.153795000 | -1.663992000 | 2.720380000  |
| C | -4.224091000 | -1.662411000 | 0.829673000  |
| H | -5.178157000 | -1.948678000 | 1.262119000  |
| C | -4.117898000 | -1.450941000 | -0.530747000 |
| H | -4.974164000 | -1.561341000 | -1.188321000 |
| C | -2.865471000 | -1.070335000 | -1.062558000 |
| N | 0.183808000  | 2.051530000  | -0.552575000 |
| N | 0.254984000  | 0.052438000  | 1.444162000  |
| N | 1.806226000  | -1.133334000 | -0.606098000 |
| N | -1.780290000 | -0.922679000 | -0.276428000 |
| H | 1.956461000  | -1.882982000 | -2.526663000 |

|   |              |              |              |
|---|--------------|--------------|--------------|
| N | -2.716713000 | -0.790639000 | -2.396530000 |
| H | -1.773926000 | -0.800868000 | -2.763479000 |
| H | -3.429741000 | -1.117139000 | -3.033784000 |

**3c**

|    |              |              |              |
|----|--------------|--------------|--------------|
| Cu | -0.008538000 | 0.048828000  | 0.658563000  |
| C  | 1.295786000  | -2.729337000 | 1.070025000  |
| C  | 2.070629000  | -3.818698000 | 0.615927000  |
| H  | 2.522163000  | -4.498748000 | 1.331135000  |
| C  | 2.239469000  | -3.989872000 | -0.744747000 |
| H  | 2.835282000  | -4.817390000 | -1.118255000 |
| C  | 1.632992000  | -3.095169000 | -1.639826000 |
| H  | 1.742219000  | -3.214999000 | -2.712302000 |
| C  | 0.878561000  | -2.053016000 | -1.123093000 |
| C  | 0.118161000  | -1.103547000 | -2.039727000 |
| H  | 0.501770000  | -1.193657000 | -3.067574000 |
| H  | -0.930034000 | -1.425957000 | -2.064596000 |
| C  | 1.397012000  | 0.990859000  | -1.762137000 |
| H  | 1.435919000  | 1.508619000  | -2.733388000 |
| H  | 2.193698000  | 0.236625000  | -1.779267000 |
| C  | 1.721188000  | 1.977615000  | -0.644911000 |
| C  | 2.465101000  | 3.128808000  | -0.908357000 |
| H  | 2.757656000  | 3.359642000  | -1.928302000 |
| C  | 2.829548000  | 3.966724000  | 0.144712000  |
| H  | 3.410166000  | 4.864925000  | -0.042627000 |
| C  | 2.432154000  | 3.631299000  | 1.438168000  |
| H  | 2.691785000  | 4.250431000  | 2.290236000  |
| C  | 1.678220000  | 2.475725000  | 1.619962000  |
| C  | -1.070669000 | 1.059893000  | -1.880803000 |
| H  | -1.334485000 | 0.999790000  | -2.948088000 |
| H  | -0.842477000 | 2.111946000  | -1.669155000 |
| C  | -2.271639000 | 0.659198000  | -1.033701000 |
| C  | -3.546543000 | 0.600633000  | -1.576445000 |
| H  | -3.702835000 | 0.792170000  | -2.632541000 |
| C  | -4.621761000 | 0.293835000  | -0.729157000 |
| H  | -5.631919000 | 0.241917000  | -1.124211000 |
| C  | -4.391903000 | 0.061753000  | 0.614309000  |
| H  | -5.204977000 | -0.172784000 | 1.293909000  |
| C  | -3.067426000 | 0.131651000  | 1.094375000  |

|                       |              |              |              |
|-----------------------|--------------|--------------|--------------|
| N                     | 0.728083000  | -1.860592000 | 0.211270000  |
| N                     | 0.131736000  | 0.282744000  | -1.556266000 |
| N                     | 1.324638000  | 1.662696000  | 0.608412000  |
| N                     | -2.034211000 | 0.413071000  | 0.278858000  |
| H                     | 1.341536000  | 2.181522000  | 2.609386000  |
| N                     | -2.764028000 | -0.130865000 | 2.414439000  |
| H                     | -1.923978000 | 0.319110000  | 2.758408000  |
| H                     | -3.535051000 | -0.100310000 | 3.069323000  |
| N                     | 1.122491000  | -2.481660000 | 2.411471000  |
| H                     | 0.296465000  | -1.948689000 | 2.655074000  |
| H                     | 1.330457000  | -3.238062000 | 3.049788000  |
| <b><sup>14</sup>c</b> |              |              |              |
| Cu                    | 0.742636000  | 0.005456000  | -0.426652000 |
| C                     | 1.282364000  | -2.741066000 | -1.757019000 |
| H                     | 0.443934000  | -2.474795000 | -2.393353000 |
| C                     | 1.892327000  | -3.988118000 | -1.861333000 |
| H                     | 1.533193000  | -4.709033000 | -2.587983000 |
| C                     | 2.956829000  | -4.279501000 | -1.009965000 |
| H                     | 3.454006000  | -5.243840000 | -1.052647000 |
| C                     | 3.371790000  | -3.311178000 | -0.095778000 |
| H                     | 4.196377000  | -3.505898000 | 0.583403000  |
| C                     | 2.720652000  | -2.077654000 | -0.060559000 |
| C                     | 3.209599000  | -0.964319000 | 0.861343000  |
| H                     | 3.791108000  | -1.400167000 | 1.688876000  |
| H                     | 3.904797000  | -0.337684000 | 0.288754000  |
| C                     | 1.293548000  | -0.669637000 | 2.393210000  |
| H                     | 1.695165000  | -0.473361000 | 3.399497000  |
| H                     | 1.304751000  | -1.758444000 | 2.259211000  |
| C                     | -0.160063000 | -0.209335000 | 2.328111000  |
| C                     | -0.926490000 | -0.104139000 | 3.483669000  |
| H                     | -0.482860000 | -0.293131000 | 4.455654000  |
| C                     | -2.269718000 | 0.262933000  | 3.361898000  |
| H                     | -2.888353000 | 0.380284000  | 4.246522000  |
| C                     | -2.804123000 | 0.517347000  | 2.106820000  |
| H                     | -3.822530000 | 0.862798000  | 1.994864000  |
| C                     | -1.979989000 | 0.370024000  | 0.980531000  |
| C                     | 2.506152000  | 1.307114000  | 1.536477000  |
| H                     | 3.432134000  | 1.413358000  | 2.123057000  |
| H                     | 1.708623000  | 1.776692000  | 2.125595000  |



|   |              |              |              |
|---|--------------|--------------|--------------|
| C | 2.639783000  | 2.084228000  | 0.229715000  |
| C | 3.558683000  | 3.127445000  | 0.112879000  |
| H | 4.227727000  | 3.351894000  | 0.938157000  |
| C | 3.603006000  | 3.874534000  | -1.064230000 |
| H | 4.310296000  | 4.691496000  | -1.170245000 |
| C | 2.728795000  | 3.549710000  | -2.099999000 |
| H | 2.726402000  | 4.100056000  | -3.034737000 |
| C | 1.849849000  | 2.485889000  | -1.916417000 |
| N | 1.681039000  | -1.802744000 | -0.879830000 |
| N | 2.128570000  | -0.094645000 | 1.334493000  |
| N | -0.681861000 | 0.020072000  | 1.102899000  |
| N | 1.799552000  | 1.765591000  | -0.781126000 |
| N | -2.371112000 | 0.655898000  | -0.326746000 |
| H | -1.634783000 | 1.097753000  | -0.872288000 |
| C | -3.569555000 | 0.685576000  | -1.077526000 |
| C | -4.805526000 | -0.183552000 | -0.748727000 |
| C | -5.856760000 | 0.696561000  | -0.028951000 |
| H | -6.086858000 | 1.585983000  | -0.623706000 |
| H | -6.781511000 | 0.124271000  | 0.102053000  |
| H | -5.535114000 | 1.028235000  | 0.964182000  |
| C | -4.490960000 | -1.458257000 | 0.058149000  |
| H | -3.696548000 | -2.044461000 | -0.418239000 |
| H | -4.198677000 | -1.264220000 | 1.091958000  |
| H | -5.387323000 | -2.086697000 | 0.091550000  |
| C | -5.397017000 | -0.612704000 | -2.113455000 |
| H | -4.697721000 | -1.251612000 | -2.664205000 |
| H | -6.317358000 | -1.181885000 | -1.945376000 |
| H | -5.623054000 | 0.254282000  | -2.735984000 |
| O | -3.535397000 | 1.378353000  | -2.080253000 |
| H | 1.158536000  | 2.192448000  | -2.700511000 |

**15c**

|    |              |             |             |
|----|--------------|-------------|-------------|
| Cu | -0.016123000 | 0.685634000 | 0.041464000 |
| C  | 0.493340000  | 1.099084000 | 3.079988000 |
| H  | 0.177085000  | 0.063378000 | 3.159240000 |
| C  | 0.779264000  | 1.849206000 | 4.217618000 |
| H  | 0.690634000  | 1.399623000 | 5.200862000 |
| C  | 1.167630000  | 3.178214000 | 4.055961000 |
| H  | 1.390280000  | 3.800442000 | 4.917508000 |

|   |              |              |              |
|---|--------------|--------------|--------------|
| C | 1.259855000  | 3.699808000  | 2.765702000  |
| H | 1.556101000  | 4.731879000  | 2.603507000  |
| C | 0.971642000  | 2.881200000  | 1.673080000  |
| C | 1.148103000  | 3.393796000  | 0.246712000  |
| H | 1.114721000  | 4.494592000  | 0.243888000  |
| H | 2.153528000  | 3.111786000  | -0.089474000 |
| C | -1.166727000 | 3.342743000  | -0.601016000 |
| H | -1.313824000 | 4.218992000  | -1.251715000 |
| H | -1.308674000 | 3.693223000  | 0.428817000  |
| C | -2.251753000 | 2.309775000  | -0.889833000 |
| C | -3.488128000 | 2.706765000  | -1.388365000 |
| H | -3.671294000 | 3.747952000  | -1.632904000 |
| C | -4.475739000 | 1.736723000  | -1.576872000 |
| H | -5.443062000 | 2.010754000  | -1.987022000 |
| C | -4.202276000 | 0.409524000  | -1.277237000 |
| H | -4.926844000 | -0.368342000 | -1.476619000 |
| C | -2.940179000 | 0.082362000  | -0.759745000 |
| C | 0.691992000  | 2.609145000  | -2.055994000 |
| H | 1.128655000  | 3.527431000  | -2.479505000 |
| H | -0.170609000 | 2.351837000  | -2.683337000 |
| C | 1.706466000  | 1.475196000  | -2.154418000 |
| C | 2.777631000  | 1.548759000  | -3.038121000 |
| H | 2.930997000  | 2.439465000  | -3.638468000 |
| C | 3.630065000  | 0.446662000  | -3.151413000 |
| H | 4.451700000  | 0.458382000  | -3.861174000 |
| C | 3.407374000  | -0.674655000 | -2.364921000 |
| H | 4.022469000  | -1.559508000 | -2.463449000 |
| C | 2.343950000  | -0.657908000 | -1.449452000 |
| C | 2.755875000  | -2.758982000 | 0.030682000  |
| N | 0.585649000  | 1.595878000  | 1.833726000  |
| N | 0.190648000  | 2.801579000  | -0.691349000 |
| N | -1.988352000 | 1.022244000  | -0.575121000 |
| N | 1.499965000  | 0.391455000  | -1.370833000 |
| N | 2.026849000  | -1.734202000 | -0.617976000 |
| H | 1.038328000  | -1.970876000 | -0.600260000 |
| O | 2.125518000  | -3.764651000 | 0.302706000  |
| C | 4.221059000  | -2.588471000 | 0.500445000  |
| C | 4.288516000  | -3.248238000 | 1.900318000  |
| H | 3.939884000  | -4.281368000 | 1.864844000  |

|   |              |              |              |
|---|--------------|--------------|--------------|
| H | 5.322984000  | -3.231819000 | 2.259533000  |
| H | 3.668874000  | -2.705459000 | 2.623444000  |
| C | 4.697743000  | -1.129470000 | 0.636524000  |
| H | 4.851627000  | -0.628922000 | -0.321724000 |
| H | 3.994662000  | -0.531856000 | 1.228857000  |
| H | 5.659539000  | -1.119810000 | 1.160472000  |
| C | 5.140041000  | -3.389508000 | -0.452819000 |
| H | 4.803631000  | -4.427837000 | -0.529263000 |
| H | 5.176121000  | -2.967732000 | -1.463266000 |
| H | 6.163240000  | -3.387878000 | -0.061582000 |
| N | -2.519654000 | -1.218173000 | -0.483467000 |
| H | -1.565378000 | -1.392958000 | -0.787797000 |
| C | -3.151383000 | -2.461359000 | -0.233041000 |
| C | -4.452611000 | -2.593293000 | 0.591390000  |
| C | -5.612561000 | -2.950829000 | -0.368930000 |
| H | -5.359997000 | -3.832442000 | -0.965769000 |
| H | -6.512206000 | -3.176498000 | 0.213731000  |
| H | -5.865594000 | -2.136186000 | -1.056949000 |
| C | -4.798404000 | -1.364812000 | 1.454118000  |
| H | -3.949953000 | -1.064807000 | 2.079873000  |
| H | -5.119846000 | -0.496949000 | 0.874108000  |
| H | -5.624578000 | -1.625306000 | 2.124116000  |
| C | -4.223554000 | -3.798010000 | 1.538530000  |
| H | -3.418691000 | -3.591529000 | 2.253023000  |
| H | -5.140070000 | -3.991548000 | 2.105737000  |
| H | -3.955749000 | -4.694432000 | 0.977067000  |
| O | -2.536799000 | -3.445486000 | -0.603832000 |

**<sup>31</sup>d**

|    |              |              |              |
|----|--------------|--------------|--------------|
| Cu | -2.268902000 | -0.008160000 | -0.208528000 |
| C  | -2.790644000 | -1.948208000 | -2.619720000 |
| H  | -1.737781000 | -1.753957000 | -2.804011000 |
| C  | -3.559684000 | -2.716715000 | -3.490404000 |
| H  | -3.111804000 | -3.145059000 | -4.380763000 |
| C  | -4.909309000 | -2.906724000 | -3.193560000 |
| H  | -5.543947000 | -3.491821000 | -3.852233000 |
| C  | -5.438289000 | -2.325806000 | -2.039791000 |
| H  | -6.486275000 | -2.450348000 | -1.784434000 |
| C  | -4.598738000 | -1.580110000 | -1.212725000 |

|    |              |              |              |
|----|--------------|--------------|--------------|
| C  | -5.084010000 | -0.977050000 | 0.094487000  |
| H  | -6.176217000 | -0.849343000 | 0.077708000  |
| H  | -4.859565000 | -1.680783000 | 0.905203000  |
| C  | -4.892175000 | 1.423182000  | -0.393105000 |
| H  | -5.803235000 | 1.857561000  | 0.044204000  |
| H  | -5.170479000 | 1.032055000  | -1.379170000 |
| C  | -3.837653000 | 2.498286000  | -0.593761000 |
| C  | -4.190248000 | 3.837773000  | -0.761924000 |
| H  | -5.230076000 | 4.140829000  | -0.684287000 |
| C  | -3.192657000 | 4.772790000  | -1.038075000 |
| H  | -3.445770000 | 5.819536000  | -1.176781000 |
| C  | -1.869877000 | 4.340496000  | -1.131512000 |
| H  | -1.064029000 | 5.033734000  | -1.348444000 |
| C  | -1.596442000 | 2.988910000  | -0.936107000 |
| H  | -0.587310000 | 2.591821000  | -0.995683000 |
| C  | -4.338585000 | 0.578421000  | 1.847198000  |
| H  | -5.321093000 | 0.456058000  | 2.326547000  |
| H  | -4.059735000 | 1.633220000  | 1.960255000  |
| C  | -3.297424000 | -0.271226000 | 2.555502000  |
| C  | -3.475375000 | -0.707452000 | 3.868774000  |
| H  | -4.396050000 | -0.479575000 | 4.397239000  |
| C  | -2.459656000 | -1.438302000 | 4.485802000  |
| H  | -2.579632000 | -1.789849000 | 5.506092000  |
| C  | -1.296796000 | -1.717741000 | 3.767906000  |
| H  | -0.486948000 | -2.290773000 | 4.206961000  |
| C  | -1.197774000 | -1.255066000 | 2.458292000  |
| N  | -3.296415000 | -1.396154000 | -1.505991000 |
| N  | -4.390036000 | 0.288863000  | 0.402920000  |
| N  | -2.555950000 | 2.086662000  | -0.670477000 |
| N  | -2.171885000 | -0.546660000 | 1.863816000  |
| O  | -0.467614000 | -0.491192000 | -0.903940000 |
| O  | 0.459134000  | 0.452514000  | -0.923209000 |
| Cu | 2.263748000  | -0.001942000 | -0.211381000 |
| C  | 1.479565000  | -3.051931000 | -0.440341000 |
| H  | 0.483733000  | -2.633861000 | -0.554531000 |
| C  | 1.704115000  | -4.426153000 | -0.420376000 |
| H  | 0.871831000  | -5.115661000 | -0.514967000 |
| C  | 3.012921000  | -4.885440000 | -0.273726000 |
| H  | 3.228382000  | -5.949306000 | -0.246173000 |

|   |              |              |              |
|---|--------------|--------------|--------------|
| C | 4.045547000  | -3.954487000 | -0.162562000 |
| H | 5.076086000  | -4.277701000 | -0.050444000 |
| C | 3.741030000  | -2.593368000 | -0.206393000 |
| C | 4.835881000  | -1.540413000 | -0.195674000 |
| H | 5.739251000  | -1.933081000 | 0.294167000  |
| H | 5.108913000  | -1.325607000 | -1.235871000 |
| C | 4.355696000  | -0.322642000 | 1.883806000  |
| H | 5.351632000  | -0.164507000 | 2.323322000  |
| H | 4.038815000  | -1.332548000 | 2.171212000  |
| C | 3.363056000  | 0.674767000  | 2.456172000  |
| C | 3.584374000  | 1.315564000  | 3.675528000  |
| H | 4.504841000  | 1.138914000  | 4.223653000  |
| C | 2.612545000  | 2.184409000  | 4.173037000  |
| H | 2.767068000  | 2.696060000  | 5.118187000  |
| C | 1.449435000  | 2.392995000  | 3.431918000  |
| H | 0.673890000  | 3.068378000  | 3.777420000  |
| C | 1.305555000  | 1.722660000  | 2.219829000  |
| H | 0.426322000  | 1.856279000  | 1.596942000  |
| C | 5.122470000  | 0.896795000  | -0.109673000 |
| H | 6.208605000  | 0.724374000  | -0.123349000 |
| H | 4.943088000  | 1.730517000  | 0.579897000  |
| C | 4.630466000  | 1.300429000  | -1.489092000 |
| C | 5.476851000  | 1.876058000  | -2.436445000 |
| H | 6.533246000  | 2.002831000  | -2.219650000 |
| C | 4.943689000  | 2.285728000  | -3.659633000 |
| H | 5.583470000  | 2.736842000  | -4.412041000 |
| C | 3.582769000  | 2.099364000  | -3.902231000 |
| H | 3.130841000  | 2.398105000  | -4.842083000 |
| C | 2.807232000  | 1.505541000  | -2.909258000 |
| N | 2.472634000  | -2.153074000 | -0.332366000 |
| N | 4.389784000  | -0.274446000 | 0.411210000  |
| N | 2.236498000  | 0.880490000  | 1.742343000  |
| N | 3.317476000  | 1.118110000  | -1.730095000 |
| H | 1.744722000  | 1.323481000  | -3.043465000 |
| H | -0.319373000 | -1.452969000 | 1.851426000  |

<sup>1</sup>**d<sub>CSS</sub>**

|    |             |              |              |
|----|-------------|--------------|--------------|
| Cu | 2.286929000 | -0.047392000 | -0.012095000 |
| C  | 2.236268000 | -3.130864000 | -0.112127000 |

|   |             |              |              |
|---|-------------|--------------|--------------|
| H | 1.177193000 | -2.968382000 | 0.067270000  |
| C | 2.783867000 | -4.409326000 | -0.177425000 |
| H | 2.151141000 | -5.280971000 | -0.048581000 |
| C | 4.155202000 | -4.534468000 | -0.401797000 |
| H | 4.620891000 | -5.514094000 | -0.450393000 |
| C | 4.925235000 | -3.381325000 | -0.558506000 |
| H | 5.994993000 | -3.446082000 | -0.732467000 |
| C | 4.301305000 | -2.135624000 | -0.493197000 |
| C | 5.056610000 | -0.841683000 | -0.740101000 |
| H | 6.127557000 | -0.973991000 | -0.527134000 |
| H | 4.972822000 | -0.594907000 | -1.805595000 |
| C | 4.855134000 | 0.272532000  | 1.445890000  |
| H | 5.856984000 | 0.696109000  | 1.609336000  |
| H | 4.898569000 | -0.776441000 | 1.763418000  |
| C | 3.827932000 | 0.992474000  | 2.304131000  |
| C | 4.182738000 | 1.662557000  | 3.475138000  |
| H | 5.224496000 | 1.723843000  | 3.775149000  |
| C | 3.179995000 | 2.247450000  | 4.249819000  |
| H | 3.432860000 | 2.772509000  | 5.165993000  |
| C | 1.854305000 | 2.155691000  | 3.825034000  |
| H | 1.047790000 | 2.603482000  | 4.396097000  |
| C | 1.582081000 | 1.480161000  | 2.637462000  |
| H | 0.573454000 | 1.387198000  | 2.243419000  |
| C | 4.722847000 | 1.590644000  | -0.627500000 |
| H | 5.764480000 | 1.690658000  | -0.965503000 |
| H | 4.560980000 | 2.365927000  | 0.130768000  |
| C | 3.762810000 | 1.849502000  | -1.776469000 |
| C | 4.130911000 | 2.619348000  | -2.880350000 |
| H | 5.146050000 | 2.994174000  | -2.970109000 |
| C | 3.175635000 | 2.902232000  | -3.857233000 |
| H | 3.439917000 | 3.498819000  | -4.725126000 |
| C | 1.880679000 | 2.407751000  | -3.700699000 |
| H | 1.107964000 | 2.609167000  | -4.435154000 |
| C | 1.595641000 | 1.636448000  | -2.576473000 |
| N | 2.976812000 | -2.022583000 | -0.266301000 |
| N | 4.481679000 | 0.285906000  | 0.017497000  |
| N | 2.545573000 | 0.908893000  | 1.898658000  |
| N | 2.515417000 | 1.357958000  | -1.639353000 |
| O | 0.401044000 | -0.533383000 | -0.003693000 |

|    |              |              |              |
|----|--------------|--------------|--------------|
| O  | -0.401148000 | 0.534490000  | -0.004707000 |
| Cu | -2.286981000 | 0.047836000  | -0.012487000 |
| C  | -1.594662000 | -1.639714000 | -2.573890000 |
| H  | -0.603404000 | -1.234467000 | -2.392635000 |
| C  | -1.879202000 | -2.412587000 | -3.697152000 |
| H  | -1.106236000 | -2.614834000 | -4.431114000 |
| C  | -3.174010000 | -2.907562000 | -3.853408000 |
| H  | -3.437894000 | -3.505365000 | -4.720586000 |
| C  | -4.129647000 | -2.623552000 | -2.877215000 |
| H  | -5.144684000 | -2.998697000 | -2.966774000 |
| C  | -3.762037000 | -1.852142000 | -1.774258000 |
| C  | -4.722479000 | -1.591912000 | -0.625934000 |
| H  | -5.763993000 | -1.692632000 | -0.964101000 |
| H  | -4.560641000 | -2.366139000 | 0.133415000  |
| C  | -5.056809000 | 0.840210000  | -0.741793000 |
| H  | -6.127845000 | 0.972517000  | -0.529266000 |
| H  | -4.972672000 | 0.592088000  | -1.806949000 |
| C  | -4.301894000 | 2.134656000  | -0.496323000 |
| C  | -4.926096000 | 3.380134000  | -0.563279000 |
| H  | -5.995830000 | 3.444429000  | -0.737551000 |
| C  | -4.156364000 | 4.533639000  | -0.407778000 |
| H  | -4.622266000 | 5.513099000  | -0.457656000 |
| C  | -2.785048000 | 4.409096000  | -0.182930000 |
| H  | -2.152574000 | 5.281056000  | -0.054979000 |
| C  | -2.237150000 | 3.130856000  | -0.115983000 |
| H  | -1.178094000 | 2.968800000  | 0.063882000  |
| C  | -4.855403000 | -0.271115000 | 1.445692000  |
| H  | -5.857154000 | -0.694765000 | 1.609578000  |
| H  | -4.899213000 | 0.778269000  | 1.761825000  |
| C  | -3.828109000 | -0.989615000 | 2.305035000  |
| C  | -4.182926000 | -1.658204000 | 3.476904000  |
| H  | -5.224715000 | -1.719356000 | 3.776832000  |
| C  | -3.180157000 | -2.241777000 | 4.252529000  |
| H  | -3.433016000 | -2.765649000 | 5.169385000  |
| C  | -1.854424000 | -2.150269000 | 3.827810000  |
| H  | -1.047887000 | -2.597090000 | 4.399601000  |
| C  | -1.582207000 | -1.476297000 | 2.639354000  |
| N  | -2.514800000 | -1.360158000 | -1.637416000 |
| N  | -4.481782000 | -0.286270000 | 0.017377000  |

|   |              |              |              |
|---|--------------|--------------|--------------|
| N | -2.977425000 | 2.022214000  | -0.269009000 |
| N | -2.545729000 | -0.906266000 | 1.899630000  |
| H | -0.573555000 | -1.383614000 | 2.245307000  |
| H | 0.604233000  | 1.231672000  | -2.394979000 |

**<sup>1</sup>d<sub>oss</sub>**

|    |              |              |              |
|----|--------------|--------------|--------------|
| Cu | -2.226001000 | -0.003675000 | -0.217584000 |
| C  | -2.753546000 | -1.734876000 | -2.761162000 |
| H  | -1.694607000 | -1.544966000 | -2.911067000 |
| C  | -3.525838000 | -2.420252000 | -3.696224000 |
| H  | -3.074736000 | -2.788617000 | -4.611432000 |
| C  | -4.882545000 | -2.606436000 | -3.430411000 |
| H  | -5.518611000 | -3.127572000 | -4.139500000 |
| C  | -5.417589000 | -2.106184000 | -2.241784000 |
| H  | -6.470799000 | -2.231261000 | -2.009302000 |
| C  | -4.575546000 | -1.441540000 | -1.351105000 |
| C  | -5.057946000 | -0.929806000 | -0.005400000 |
| H  | -6.145764000 | -0.770311000 | -0.017593000 |
| H  | -4.857302000 | -1.698511000 | 0.750508000  |
| C  | -4.807797000 | 1.495304000  | -0.306471000 |
| H  | -5.715275000 | 1.909498000  | 0.156569000  |
| H  | -5.082929000 | 1.187218000  | -1.322369000 |
| C  | -3.730904000 | 2.560262000  | -0.412571000 |
| C  | -4.050985000 | 3.916309000  | -0.481804000 |
| H  | -5.084188000 | 4.237634000  | -0.390831000 |
| C  | -3.028341000 | 4.844727000  | -0.678130000 |
| H  | -3.255236000 | 5.904824000  | -0.739202000 |
| C  | -1.715381000 | 4.388769000  | -0.794468000 |
| H  | -0.891875000 | 5.077026000  | -0.953134000 |
| C  | -1.474503000 | 3.020098000  | -0.699538000 |
| H  | -0.476632000 | 2.599395000  | -0.783352000 |
| C  | -4.298572000 | 0.470572000  | 1.868456000  |
| H  | -5.292378000 | 0.335649000  | 2.319535000  |
| H  | -3.997659000 | 1.506768000  | 2.064867000  |
| C  | -3.288567000 | -0.456662000 | 2.521353000  |
| C  | -3.488050000 | -0.990453000 | 3.794642000  |
| H  | -4.406468000 | -0.782754000 | 4.335261000  |
| C  | -2.494574000 | -1.793991000 | 4.355750000  |
| H  | -2.630557000 | -2.222521000 | 5.344126000  |
| C  | -1.334019000 | -2.046182000 | 3.623965000  |



|    |              |              |              |
|----|--------------|--------------|--------------|
| H  | -0.542944000 | -2.673718000 | 4.020706000  |
| C  | -1.213395000 | -1.483668000 | 2.355565000  |
| N  | -3.267223000 | -1.260577000 | -1.615970000 |
| N  | -4.332815000 | 0.292265000  | 0.403764000  |
| N  | -2.458339000 | 2.125524000  | -0.508918000 |
| N  | -2.165342000 | -0.705126000 | 1.817504000  |
| O  | -0.465118000 | -0.493807000 | -0.900331000 |
| O  | 0.464379000  | 0.486243000  | -0.904683000 |
| Cu | 2.225319000  | 0.002035000  | -0.217581000 |
| C  | 1.466710000  | -3.028060000 | -0.648076000 |
| H  | 0.469686000  | -2.606591000 | -0.737924000 |
| C  | 1.704406000  | -4.398617000 | -0.720939000 |
| H  | 0.879170000  | -5.087497000 | -0.867459000 |
| C  | 3.016465000  | -4.855613000 | -0.598592000 |
| H  | 3.240911000  | -5.917077000 | -0.642603000 |
| C  | 4.041372000  | -3.926405000 | -0.418616000 |
| H  | 5.073987000  | -4.248456000 | -0.323649000 |
| C  | 3.724402000  | -2.568666000 | -0.371122000 |
| C  | 4.804048000  | -1.504790000 | -0.283919000 |
| H  | 5.710831000  | -1.913428000 | 0.185407000  |
| H  | 5.079241000  | -1.214908000 | -1.305141000 |
| C  | 4.300142000  | -0.441751000 | 1.873620000  |
| H  | 5.294964000  | -0.301655000 | 2.320867000  |
| H  | 3.996946000  | -1.473659000 | 2.088193000  |
| C  | 3.293560000  | 0.499276000  | 2.511906000  |
| C  | 3.496100000  | 1.054010000  | 3.775715000  |
| H  | 4.414445000  | 0.852653000  | 4.318859000  |
| C  | 2.505840000  | 1.870243000  | 4.324044000  |
| H  | 2.644291000  | 2.315162000  | 5.304807000  |
| C  | 1.345363000  | 2.113776000  | 3.589222000  |
| H  | 0.556801000  | 2.750663000  | 3.975938000  |
| C  | 1.221546000  | 1.530101000  | 2.330720000  |
| H  | 0.347074000  | 1.692080000  | 1.707804000  |
| C  | 5.060219000  | 0.924483000  | -0.025065000 |
| H  | 6.147651000  | 0.762238000  | -0.035880000 |
| H  | 4.862408000  | 1.706602000  | 0.717714000  |
| C  | 4.577207000  | 1.413966000  | -1.378768000 |
| C  | 5.419489000  | 2.061340000  | -2.281864000 |
| H  | 6.473265000  | 2.188185000  | -2.052923000 |

|   |              |              |              |
|---|--------------|--------------|--------------|
| C | 4.883952000  | 2.542144000  | -3.478269000 |
| H | 5.520205000  | 3.049590000  | -4.197051000 |
| C | 3.526504000  | 2.354346000  | -3.739098000 |
| H | 3.074980000  | 2.707886000  | -4.659927000 |
| C | 2.753991000  | 1.686865000  | -2.791356000 |
| N | 2.452712000  | -2.132627000 | -0.473088000 |
| N | 4.332774000  | -0.288689000 | 0.406063000  |
| N | 2.170333000  | 0.739276000  | 1.805136000  |
| N | 3.268185000  | 1.231266000  | -1.638836000 |
| H | 1.694419000  | 1.496787000  | -2.936439000 |
| H | -0.338926000 | -1.653303000 | 1.734681000  |

**3d**

|    |              |              |              |
|----|--------------|--------------|--------------|
| Cu | -2.246746000 | -0.174148000 | 0.158335000  |
| C  | -2.743903000 | -0.739478000 | 3.228617000  |
| H  | -1.660227000 | -0.813865000 | 3.229591000  |
| C  | -3.503770000 | -0.988743000 | 4.369011000  |
| H  | -3.019015000 | -1.265833000 | 5.299120000  |
| C  | -4.892055000 | -0.882632000 | 4.278843000  |
| H  | -5.519143000 | -1.077445000 | 5.143578000  |
| C  | -5.468089000 | -0.528993000 | 3.057737000  |
| H  | -6.545496000 | -0.442136000 | 2.954660000  |
| C  | -4.635833000 | -0.284223000 | 1.965652000  |
| C  | -5.173531000 | 0.176001000  | 0.623562000  |
| H  | -6.222892000 | -0.126771000 | 0.499313000  |
| H  | -5.152284000 | 1.271599000  | 0.596013000  |
| C  | -4.602298000 | -1.728566000 | -0.808914000 |
| H  | -5.497604000 | -1.837805000 | -1.438019000 |
| H  | -4.813108000 | -2.242559000 | 0.136678000  |
| C  | -3.409115000 | -2.403297000 | -1.456697000 |
| C  | -3.568668000 | -3.467951000 | -2.343677000 |
| H  | -4.564289000 | -3.784833000 | -2.638952000 |
| C  | -2.435895000 | -4.117994000 | -2.833654000 |
| H  | -2.536699000 | -4.950779000 | -3.523109000 |
| C  | -1.177649000 | -3.681198000 | -2.420780000 |
| H  | -0.270162000 | -4.162821000 | -2.769182000 |
| C  | -1.100488000 | -2.601794000 | -1.544058000 |
| H  | -0.151500000 | -2.223436000 | -1.178893000 |
| C  | -4.406997000 | 0.557330000  | -1.684227000 |
| H  | -5.447397000 | 0.741500000  | -1.987397000 |

|    |              |              |              |
|----|--------------|--------------|--------------|
| H  | -3.920378000 | 0.018759000  | -2.506232000 |
| C  | -3.683524000 | 1.866743000  | -1.447227000 |
| C  | -4.180869000 | 3.066625000  | -1.923159000 |
| H  | -5.122877000 | 3.101380000  | -2.459314000 |
| C  | -3.434658000 | 4.234825000  | -1.686523000 |
| H  | -3.795398000 | 5.194637000  | -2.044012000 |
| C  | -2.246698000 | 4.158857000  | -0.990717000 |
| H  | -1.652619000 | 5.044999000  | -0.790832000 |
| C  | -1.802414000 | 2.897101000  | -0.523375000 |
| N  | -3.296766000 | -0.393875000 | 2.056428000  |
| N  | -4.334091000 | -0.313644000 | -0.491580000 |
| N  | -2.190049000 | -1.969423000 | -1.075569000 |
| N  | -2.517188000 | 1.773631000  | -0.757629000 |
| N  | -0.625438000 | 2.767865000  | 0.149403000  |
| O  | -0.477447000 | -0.026323000 | 1.016849000  |
| O  | 0.503349000  | -0.811069000 | 0.478238000  |
| Cu | 2.238401000  | -0.005287000 | 0.078916000  |
| C  | 1.789074000  | 1.426076000  | 2.878386000  |
| H  | 0.777692000  | 1.054869000  | 2.741543000  |
| C  | 2.152013000  | 2.188454000  | 3.985395000  |
| H  | 1.417954000  | 2.426556000  | 4.747946000  |
| C  | 3.470462000  | 2.635024000  | 4.084295000  |
| H  | 3.789693000  | 3.238110000  | 4.928903000  |
| C  | 4.376324000  | 2.294873000  | 3.080111000  |
| H  | 5.410131000  | 2.623501000  | 3.128068000  |
| C  | 3.939058000  | 1.513065000  | 2.009895000  |
| C  | 4.899810000  | 1.017452000  | 0.944966000  |
| H  | 5.739993000  | 1.715736000  | 0.824006000  |
| H  | 5.325262000  | 0.065904000  | 1.284137000  |
| C  | 4.019410000  | 1.998583000  | -1.126445000 |
| H  | 4.942667000  | 2.307612000  | -1.637447000 |
| H  | 3.760889000  | 2.797519000  | -0.420764000 |
| C  | 2.884639000  | 1.841721000  | -2.120003000 |
| C  | 2.866752000  | 2.516043000  | -3.340322000 |
| H  | 3.702978000  | 3.146439000  | -3.626653000 |
| C  | 1.764285000  | 2.362768000  | -4.181640000 |
| H  | 1.730560000  | 2.874717000  | -5.138560000 |
| C  | 0.715276000  | 1.536037000  | -3.779023000 |
| H  | -0.155821000 | 1.384523000  | -4.407433000 |

|   |              |              |              |
|---|--------------|--------------|--------------|
| C | 0.810245000  | 0.892401000  | -2.548299000 |
| H | 0.026116000  | 0.236350000  | -2.186201000 |
| C | 4.885563000  | -0.301982000 | -1.130260000 |
| H | 5.962346000  | -0.108614000 | -1.233436000 |
| H | 4.453358000  | -0.276601000 | -2.137393000 |
| C | 4.644812000  | -1.667739000 | -0.521426000 |
| C | 5.634356000  | -2.633677000 | -0.513604000 |
| H | 6.621375000  | -2.419696000 | -0.908757000 |
| C | 5.320548000  | -3.898066000 | 0.016951000  |
| H | 6.070421000  | -4.683106000 | 0.038066000  |
| C | 4.058366000  | -4.134816000 | 0.516009000  |
| H | 3.788761000  | -5.100388000 | 0.932136000  |
| C | 3.097409000  | -3.092202000 | 0.487784000  |
| N | 2.661022000  | 1.098290000  | 1.909433000  |
| N | 4.221642000  | 0.763263000  | -0.342609000 |
| N | 1.869597000  | 1.040586000  | -1.737795000 |
| N | 3.397653000  | -1.877470000 | -0.027545000 |
| N | 1.834053000  | -3.294237000 | 0.948789000  |
| H | 1.209861000  | -2.496641000 | 1.045790000  |
| H | 1.644121000  | -4.114059000 | 1.505392000  |
| H | -0.200515000 | 3.593289000  | 0.544492000  |
| H | -0.406714000 | 1.867460000  | 0.573794000  |

**'2d<sub>CSS</sub>**

|    |             |              |              |
|----|-------------|--------------|--------------|
| Cu | 2.354341000 | 0.067683000  | 0.023539000  |
| C  | 2.008522000 | 2.042906000  | 2.413527000  |
| H  | 0.957906000 | 1.915203000  | 2.170086000  |
| C  | 2.436950000 | 2.915415000  | 3.410771000  |
| H  | 1.714336000 | 3.492959000  | 3.977489000  |
| C  | 3.806656000 | 3.032121000  | 3.649728000  |
| H  | 4.179696000 | 3.707276000  | 4.413889000  |
| C  | 4.695766000 | 2.275255000  | 2.885451000  |
| H  | 5.767561000 | 2.348960000  | 3.042465000  |
| C  | 4.188355000 | 1.415497000  | 1.911420000  |
| C  | 5.081350000 | 0.512309000  | 1.082053000  |
| H  | 6.100998000 | 0.920241000  | 1.025546000  |
| H  | 5.154766000 | -0.461630000 | 1.580574000  |
| C  | 4.702056000 | 1.423607000  | -1.170189000 |
| H  | 5.716391000 | 1.441059000  | -1.594856000 |

|    |              |              |              |
|----|--------------|--------------|--------------|
| H  | 4.588482000  | 2.338534000  | -0.576324000 |
| C  | 3.663177000  | 1.429558000  | -2.276241000 |
| C  | 3.946860000  | 1.916339000  | -3.552182000 |
| H  | 4.946146000  | 2.267160000  | -3.791223000 |
| C  | 2.931771000  | 1.942443000  | -4.509489000 |
| H  | 3.131150000  | 2.315559000  | -5.509494000 |
| C  | 1.664846000  | 1.473277000  | -4.163449000 |
| H  | 0.849779000  | 1.467930000  | -4.879438000 |
| C  | 1.464236000  | 0.994412000  | -2.870557000 |
| H  | 0.500775000  | 0.611515000  | -2.544291000 |
| C  | 4.965664000  | -0.999360000 | -0.855527000 |
| H  | 6.056852000  | -1.111200000 | -0.784519000 |
| H  | 4.714663000  | -0.965464000 | -1.922100000 |
| C  | 4.266707000  | -2.191183000 | -0.234023000 |
| C  | 4.928517000  | -3.391550000 | -0.045467000 |
| H  | 5.982893000  | -3.485222000 | -0.281483000 |
| C  | 4.193726000  | -4.484363000 | 0.446801000  |
| H  | 4.680247000  | -5.441950000 | 0.606253000  |
| C  | 2.851595000  | -4.336165000 | 0.725824000  |
| H  | 2.258448000  | -5.164509000 | 1.100301000  |
| C  | 2.242084000  | -3.073730000 | 0.521041000  |
| N  | 2.863524000  | 1.308220000  | 1.685659000  |
| N  | 4.514643000  | 0.276660000  | -0.261267000 |
| N  | 2.436274000  | 0.975275000  | -1.946766000 |
| N  | 2.952041000  | -2.020417000 | 0.057409000  |
| N  | 0.912593000  | -2.882471000 | 0.747185000  |
| O  | 0.442758000  | -0.021214000 | 0.523100000  |
| O  | -0.436614000 | 0.138838000  | -0.485540000 |
| Cu | -2.353104000 | -0.040038000 | -0.038845000 |
| C  | -1.568635000 | -0.309687000 | 3.009491000  |
| H  | -0.561793000 | -0.343973000 | 2.600854000  |
| C  | -1.813460000 | -0.450953000 | 4.373359000  |
| H  | -0.989728000 | -0.601030000 | 5.063281000  |
| C  | -3.134195000 | -0.403118000 | 4.819635000  |
| H  | -3.368028000 | -0.517010000 | 5.873827000  |
| C  | -4.155369000 | -0.212663000 | 3.888579000  |
| H  | -5.193969000 | -0.173917000 | 4.202756000  |
| C  | -3.827096000 | -0.067623000 | 2.540259000  |
| C  | -4.881931000 | 0.221862000  | 1.488445000  |

|                          |              |              |              |
|--------------------------|--------------|--------------|--------------|
| H                        | -5.866661000 | -0.137085000 | 1.820893000  |
| H                        | -4.962538000 | 1.308696000  | 1.370168000  |
| C                        | -4.759642000 | -1.791513000 | 0.082745000  |
| H                        | -5.812807000 | -2.007109000 | -0.149140000 |
| H                        | -4.555602000 | -2.223484000 | 1.069928000  |
| C                        | -3.842348000 | -2.454667000 | -0.927935000 |
| C                        | -4.221781000 | -3.591534000 | -1.640772000 |
| H                        | -5.221970000 | -3.998514000 | -1.527146000 |
| C                        | -3.296934000 | -4.193013000 | -2.495831000 |
| H                        | -3.570551000 | -5.078419000 | -3.061694000 |
| C                        | -2.022628000 | -3.638263000 | -2.615068000 |
| H                        | -1.275729000 | -4.075869000 | -3.268867000 |
| C                        | -1.724244000 | -2.494296000 | -1.878586000 |
| H                        | -0.752378000 | -2.013536000 | -1.927873000 |
| C                        | -5.094959000 | 0.410852000  | -0.957985000 |
| H                        | -6.182258000 | 0.529230000  | -0.845510000 |
| H                        | -4.927075000 | -0.187882000 | -1.861201000 |
| C                        | -4.429238000 | 1.760771000  | -1.128101000 |
| C                        | -5.143370000 | 2.872768000  | -1.538041000 |
| H                        | -6.212571000 | 2.811964000  | -1.709058000 |
| C                        | -4.443190000 | 4.076660000  | -1.729587000 |
| H                        | -4.969865000 | 4.967497000  | -2.058387000 |
| C                        | -3.085613000 | 4.125581000  | -1.491105000 |
| H                        | -2.522797000 | 5.044390000  | -1.622212000 |
| C                        | -2.421634000 | 2.953446000  | -1.053965000 |
| N                        | -2.548610000 | -0.121755000 | 2.113245000  |
| N                        | -4.512646000 | -0.339770000 | 0.175258000  |
| N                        | -2.613332000 | -1.916263000 | -1.057167000 |
| N                        | -3.094092000 | 1.791992000  | -0.888365000 |
| N                        | -1.093441000 | 2.955777000  | -0.750654000 |
| H                        | -0.633684000 | 2.050323000  | -0.662715000 |
| H                        | -0.535923000 | 3.743945000  | -1.044425000 |
| H                        | 0.410974000  | -3.572406000 | 1.286097000  |
| H                        | 0.564739000  | -1.924093000 | 0.749030000  |
| <b>'2d<sub>oss</sub></b> |              |              |              |
| Cu                       | -2.280318000 | -0.155398000 | 0.058828000  |
| C                        | -2.398501000 | -1.599915000 | 2.844645000  |
| H                        | -1.324298000 | -1.637592000 | 2.689415000  |

|   |              |              |              |
|---|--------------|--------------|--------------|
| C | -3.013712000 | -2.177126000 | 3.952860000  |
| H | -2.419657000 | -2.688574000 | 4.702803000  |
| C | -4.401838000 | -2.088342000 | 4.065109000  |
| H | -4.917639000 | -2.532291000 | 4.911179000  |
| C | -5.123977000 | -1.427446000 | 3.070032000  |
| H | -6.205208000 | -1.346431000 | 3.126736000  |
| C | -4.432421000 | -0.867248000 | 1.996453000  |
| C | -5.123151000 | -0.073874000 | 0.904167000  |
| H | -6.177916000 | -0.368821000 | 0.812102000  |
| H | -5.109244000 | 0.987427000  | 1.178577000  |
| C | -4.688028000 | -1.496329000 | -1.048254000 |
| H | -5.658386000 | -1.482258000 | -1.564772000 |
| H | -4.753215000 | -2.260319000 | -0.264390000 |
| C | -3.577117000 | -1.882190000 | -2.004845000 |
| C | -3.821912000 | -2.646830000 | -3.145198000 |
| H | -4.836823000 | -2.937008000 | -3.399322000 |
| C | -2.745668000 | -3.031459000 | -3.945433000 |
| H | -2.911888000 | -3.627327000 | -4.837818000 |
| C | -1.458936000 | -2.634836000 | -3.582137000 |
| H | -0.594856000 | -2.911737000 | -4.176929000 |
| C | -1.297677000 | -1.862719000 | -2.433988000 |
| H | -0.324460000 | -1.524357000 | -2.092471000 |
| C | -4.650564000 | 0.949046000  | -1.283136000 |
| H | -5.723774000 | 1.163173000  | -1.381962000 |
| H | -4.282604000 | 0.667310000  | -2.276694000 |
| C | -3.901088000 | 2.175641000  | -0.807905000 |
| C | -4.441002000 | 3.444627000  | -0.911834000 |
| H | -5.440792000 | 3.591423000  | -1.305355000 |
| C | -3.655547000 | 4.534151000  | -0.493256000 |
| H | -4.046645000 | 5.545019000  | -0.559528000 |

|    |              |              |              |
|----|--------------|--------------|--------------|
| C  | -2.389619000 | 4.315635000  | 0.007079000  |
| H  | -1.764154000 | 5.138766000  | 0.337782000  |
| C  | -1.903733000 | 2.986763000  | 0.094472000  |
| N  | -3.092951000 | -0.958994000 | 1.892706000  |
| N  | -4.410893000 | -0.205083000 | -0.386857000 |
| N  | -2.332526000 | -1.492506000 | -1.661783000 |
| N  | -2.660655000 | 1.940842000  | -0.309699000 |
| N  | -0.656808000 | 2.711223000  | 0.557788000  |
| O  | -0.455128000 | -0.157921000 | 0.743650000  |
| O  | 0.471294000  | -0.693752000 | -0.157750000 |
| Cu | 2.280187000  | -0.022386000 | 0.009857000  |
| C  | 1.601331000  | 0.698115000  | 3.026900000  |
| H  | 0.588800000  | 0.480461000  | 2.700019000  |
| C  | 1.891002000  | 1.119441000  | 4.322322000  |
| H  | 1.092600000  | 1.242447000  | 5.046500000  |
| C  | 3.219718000  | 1.380268000  | 4.658163000  |
| H  | 3.483652000  | 1.718122000  | 5.655762000  |
| C  | 4.209178000  | 1.201324000  | 3.691321000  |
| H  | 5.253008000  | 1.392894000  | 3.920727000  |
| C  | 3.840664000  | 0.762432000  | 2.419442000  |
| C  | 4.872738000  | 0.449752000  | 1.353419000  |
| H  | 5.786782000  | 1.039466000  | 1.509444000  |
| H  | 5.153648000  | -0.605652000 | 1.444905000  |
| C  | 4.323574000  | 2.069307000  | -0.410160000 |
| H  | 5.318921000  | 2.396995000  | -0.741592000 |
| H  | 4.070760000  | 2.659674000  | 0.478849000  |
| C  | 3.283279000  | 2.334788000  | -1.480450000 |
| C  | 3.438354000  | 3.328221000  | -2.446325000 |
| H  | 4.350702000  | 3.915452000  | -2.485574000 |
| C  | 2.404412000  | 3.548734000  | -3.357737000 |



|                      |              |              |              |
|----------------------|--------------|--------------|--------------|
| H                    | 2.503171000  | 4.313989000  | -4.121709000 |
| C                    | 1.250529000  | 2.768740000  | -3.277870000 |
| H                    | 0.427728000  | 2.907751000  | -3.970999000 |
| C                    | 1.175307000  | 1.790971000  | -2.289279000 |
| H                    | 0.308101000  | 1.148748000  | -2.177546000 |
| C                    | 5.003954000  | -0.215693000 | -1.011987000 |
| H                    | 6.096103000  | -0.107868000 | -0.959558000 |
| H                    | 4.689190000  | 0.136579000  | -2.001379000 |
| C                    | 4.598893000  | -1.664942000 | -0.844650000 |
| C                    | 5.487470000  | -2.698588000 | -1.073939000 |
| H                    | 6.517988000  | -2.495956000 | -1.344148000 |
| C                    | 5.010621000  | -4.017247000 | -0.950859000 |
| H                    | 5.676251000  | -4.856116000 | -1.130751000 |
| C                    | 3.699340000  | -4.242684000 | -0.593236000 |
| H                    | 3.310448000  | -5.250016000 | -0.483018000 |
| C                    | 2.847591000  | -3.133561000 | -0.351917000 |
| N                    | 2.553278000  | 0.527357000  | 2.094459000  |
| N                    | 4.331728000  | 0.645832000  | -0.008907000 |
| N                    | 2.169367000  | 1.579393000  | -1.413610000 |
| N                    | 3.304801000  | -1.865810000 | -0.490496000 |
| N                    | 1.561549000  | -3.295450000 | 0.040675000  |
| H                    | 0.952114000  | -2.475021000 | 0.086053000  |
| H                    | 1.161910000  | -4.220352000 | 0.072775000  |
| H                    | -0.145508000 | 3.430269000  | 1.046218000  |
| H                    | -0.399361000 | 1.731637000  | 0.704729000  |
| <b><sup>3</sup>d</b> |              |              |              |
| Cu                   | 2.281556000  | 0.009788000  | 0.058493000  |
| C                    | 1.077399000  | 0.545315000  | 2.929037000  |
| H                    | 0.134378000  | 0.550446000  | 2.396215000  |
| C                    | 1.144535000  | 0.775016000  | 4.301100000  |
| H                    | 0.236899000  | 0.966012000  | 4.863470000  |
| C                    | 2.393142000  | 0.759008000  | 4.921971000  |

|    |              |              |              |
|----|--------------|--------------|--------------|
| H  | 2.483836000  | 0.938924000  | 5.988933000  |
| C  | 3.531046000  | 0.517054000  | 4.150844000  |
| H  | 4.518625000  | 0.505221000  | 4.601529000  |
| C  | 3.381909000  | 0.290138000  | 2.783869000  |
| C  | 4.553501000  | -0.032725000 | 1.881422000  |
| H  | 5.486612000  | 0.385729000  | 2.283572000  |
| H  | 4.681677000  | -1.120644000 | 1.834478000  |
| C  | 4.463935000  | 1.917870000  | 0.390747000  |
| H  | 5.524984000  | 2.200155000  | 0.419560000  |
| H  | 3.981211000  | 2.363638000  | 1.267768000  |
| C  | 3.801524000  | 2.433961000  | -0.865967000 |
| C  | 4.392161000  | 3.413523000  | -1.643235000 |
| H  | 5.365410000  | 3.815631000  | -1.384043000 |
| C  | 3.692051000  | 3.869315000  | -2.774323000 |
| H  | 4.121746000  | 4.636094000  | -3.411887000 |
| C  | 2.455605000  | 3.336918000  | -3.067948000 |
| H  | 1.891565000  | 3.670929000  | -3.933280000 |
| C  | 1.911620000  | 2.334006000  | -2.224878000 |
| C  | 5.144396000  | -0.268887000 | -0.489949000 |
| H  | 6.193814000  | -0.300487000 | -0.167114000 |
| H  | 5.108106000  | 0.310026000  | -1.419596000 |
| C  | 4.620731000  | -1.660664000 | -0.760586000 |
| C  | 5.479012000  | -2.702523000 | -1.063063000 |
| H  | 6.553515000  | -2.556515000 | -1.047089000 |
| C  | 4.917491000  | -3.943735000 | -1.406728000 |
| H  | 5.558375000  | -4.783451000 | -1.657954000 |
| C  | 3.546482000  | -4.089148000 | -1.426871000 |
| H  | 3.084364000  | -5.034686000 | -1.692657000 |
| C  | 2.729122000  | -2.983811000 | -1.087078000 |
| N  | 2.171732000  | 0.307318000  | 2.188038000  |
| N  | 4.307666000  | 0.446490000  | 0.501696000  |
| N  | 2.591710000  | 1.885290000  | -1.144388000 |
| N  | 3.269684000  | -1.789603000 | -0.751151000 |
| N  | 1.370468000  | -3.102755000 | -1.048459000 |
| O  | 0.476329000  | -0.550299000 | -0.339344000 |
| O  | -0.447822000 | 0.537529000  | -0.238814000 |
| Cu | -2.309619000 | 0.018568000  | -0.106740000 |
| C  | -1.777756000 | -2.283293000 | 2.110208000  |
| C  | -2.232560000 | -3.235019000 | 3.060874000  |

|   |              |              |              |
|---|--------------|--------------|--------------|
| H | -1.516615000 | -3.903300000 | 3.528902000  |
| C | -3.573423000 | -3.297424000 | 3.366535000  |
| H | -3.935668000 | -4.025710000 | 4.085887000  |
| C | -4.472330000 | -2.419902000 | 2.733303000  |
| H | -5.535233000 | -2.453991000 | 2.945619000  |
| C | -3.961774000 | -1.506733000 | 1.830452000  |
| C | -4.857180000 | -0.501884000 | 1.141520000  |
| H | -5.902959000 | -0.836822000 | 1.155002000  |
| H | -4.813177000 | 0.455809000  | 1.671504000  |
| C | -4.668581000 | -1.410019000 | -1.137312000 |
| H | -5.709412000 | -1.396389000 | -1.488181000 |
| H | -4.541259000 | -2.321649000 | -0.542820000 |
| C | -3.701725000 | -1.448564000 | -2.302328000 |
| C | -4.044608000 | -1.997289000 | -3.538020000 |
| H | -5.049693000 | -2.369508000 | -3.711374000 |
| C | -3.075120000 | -2.057410000 | -4.539626000 |
| H | -3.317001000 | -2.478771000 | -5.510691000 |
| C | -1.797311000 | -1.562038000 | -4.276792000 |
| H | -1.017905000 | -1.585796000 | -5.031143000 |
| C | -1.536231000 | -1.018870000 | -3.020886000 |
| H | -0.563356000 | -0.611963000 | -2.764711000 |
| C | -4.938061000 | 1.007500000  | -0.803580000 |
| H | -6.031774000 | 1.041538000  | -0.706299000 |
| H | -4.705897000 | 1.015522000  | -1.875259000 |
| C | -4.302494000 | 2.210466000  | -0.143791000 |
| C | -5.006171000 | 3.383235000  | 0.056605000  |
| H | -6.052522000 | 3.456063000  | -0.218762000 |
| C | -4.323111000 | 4.474609000  | 0.621630000  |
| H | -4.839886000 | 5.414879000  | 0.788387000  |
| C | -2.995358000 | 4.345117000  | 0.968831000  |
| H | -2.446570000 | 5.169744000  | 1.412536000  |
| C | -2.339904000 | 3.107788000  | 0.751113000  |
| N | -2.641680000 | -1.426577000 | 1.513868000  |
| N | -4.397649000 | -0.255788000 | -0.247346000 |
| N | -2.469061000 | -0.965261000 | -2.055296000 |
| N | -2.996555000 | 2.062023000  | 0.195522000  |
| N | -1.044430000 | 2.919915000  | 1.126192000  |
| H | -0.547717000 | 2.119615000  | 0.732271000  |
| H | -0.497533000 | 3.738194000  | 1.352093000  |

|   |              |              |              |
|---|--------------|--------------|--------------|
| H | 0.960918000  | -3.913226000 | -1.490552000 |
| H | 0.817610000  | -2.247522000 | -1.060850000 |
| N | -0.461724000 | -2.192298000 | 1.798259000  |
| H | -0.139056000 | -1.617934000 | 1.011334000  |
| H | 0.146898000  | -2.946380000 | 2.081051000  |
| N | 0.698335000  | 1.773706000  | -2.496957000 |
| H | 0.187076000  | 1.337623000  | -1.719802000 |
| H | 0.130113000  | 2.250168000  | -3.184069000 |

**<sup>13</sup>d<sub>CSS</sub>**

|    |             |              |              |
|----|-------------|--------------|--------------|
| Cu | 2.320936000 | 0.026411000  | 0.056927000  |
| C  | 1.340460000 | 0.483191000  | 3.044857000  |
| H  | 0.356480000 | 0.492010000  | 2.589339000  |
| C  | 1.509183000 | 0.694924000  | 4.411348000  |
| H  | 0.646475000 | 0.880515000  | 5.042301000  |
| C  | 2.800763000 | 0.665440000  | 4.936478000  |
| H  | 2.972771000 | 0.831997000  | 5.995558000  |
| C  | 3.874527000 | 0.424678000  | 4.078329000  |
| H  | 4.893187000 | 0.400238000  | 4.453125000  |
| C  | 3.622755000 | 0.213555000  | 2.723026000  |
| C  | 4.727389000 | -0.114068000 | 1.739465000  |
| H  | 5.694503000 | 0.265187000  | 2.100207000  |
| H  | 4.819544000 | -1.203752000 | 1.660225000  |
| C  | 4.601224000 | 1.867885000  | 0.297457000  |
| H  | 5.667424000 | 2.128833000  | 0.237565000  |
| H  | 4.211119000 | 2.307381000  | 1.222904000  |
| C  | 3.846536000 | 2.442061000  | -0.881244000 |
| C  | 4.393140000 | 3.448794000  | -1.659136000 |
| H  | 5.392937000 | 3.819193000  | -1.460527000 |
| C  | 3.618409000 | 3.972220000  | -2.706608000 |
| H  | 4.013025000 | 4.761797000  | -3.338933000 |
| C  | 2.348578000 | 3.478323000  | -2.923545000 |
| H  | 1.722107000 | 3.868750000  | -3.719570000 |
| C  | 1.857108000 | 2.447059000  | -2.088099000 |
| C  | 5.134613000 | -0.320494000 | -0.675336000 |
| H  | 6.208602000 | -0.394851000 | -0.453546000 |
| H  | 5.034058000 | 0.271034000  | -1.592483000 |
| C  | 4.544859000 | -1.692608000 | -0.913017000 |
| C  | 5.351471000 | -2.762396000 | -1.259684000 |

|    |              |              |              |
|----|--------------|--------------|--------------|
| H  | 6.428507000  | -2.646104000 | -1.310820000 |
| C  | 4.738359000  | -3.990956000 | -1.553716000 |
| H  | 5.339638000  | -4.849991000 | -1.835549000 |
| C  | 3.365479000  | -4.098877000 | -1.482664000 |
| H  | 2.861354000  | -5.034391000 | -1.704077000 |
| C  | 2.603468000  | -2.967745000 | -1.105462000 |
| N  | 2.371974000  | 0.247056000  | 2.219323000  |
| N  | 4.415952000  | 0.404898000  | 0.391990000  |
| N  | 2.608367000  | 1.928914000  | -1.092247000 |
| N  | 3.192047000  | -1.783884000 | -0.820713000 |
| N  | 1.245027000  | -3.056015000 | -0.977686000 |
| O  | 0.433596000  | -0.460243000 | -0.117507000 |
| O  | -0.448029000 | 0.564828000  | 0.047730000  |
| Cu | -2.332378000 | 0.055080000  | -0.090550000 |
| C  | -1.943826000 | -2.275058000 | 2.203579000  |
| C  | -2.452296000 | -3.260907000 | 3.086438000  |
| H  | -1.762847000 | -3.905822000 | 3.622357000  |
| C  | -3.815788000 | -3.386562000 | 3.241546000  |
| H  | -4.222639000 | -4.141564000 | 3.907490000  |
| C  | -4.674402000 | -2.536302000 | 2.524841000  |
| H  | -5.751745000 | -2.613271000 | 2.623347000  |
| C  | -4.108613000 | -1.585649000 | 1.693254000  |
| C  | -4.978733000 | -0.595202000 | 0.948469000  |
| H  | -6.010720000 | -0.966726000 | 0.876993000  |
| H  | -5.012096000 | 0.347095000  | 1.506039000  |
| C  | -4.579854000 | -1.422484000 | -1.329138000 |
| H  | -5.585751000 | -1.437514000 | -1.772948000 |
| H  | -4.472021000 | -2.348529000 | -0.752719000 |
| C  | -3.518956000 | -1.399130000 | -2.410830000 |
| C  | -3.750910000 | -1.938706000 | -3.676676000 |
| H  | -4.728142000 | -2.341564000 | -3.924922000 |
| C  | -2.713597000 | -1.951725000 | -4.608676000 |
| H  | -2.872150000 | -2.365258000 | -5.600080000 |
| C  | -1.476484000 | -1.417462000 | -4.247825000 |
| H  | -0.644404000 | -1.399065000 | -4.943861000 |
| C  | -1.326114000 | -0.886316000 | -2.969021000 |
| H  | -0.387386000 | -0.444253000 | -2.650518000 |
| C  | -4.932351000 | 0.975438000  | -0.949780000 |
| H  | -6.031592000 | 1.000586000  | -0.948019000 |

|   |              |              |              |
|---|--------------|--------------|--------------|
| H | -4.610737000 | 1.021543000  | -1.997345000 |
| C | -4.376890000 | 2.168378000  | -0.201778000 |
| C | -5.119098000 | 3.324831000  | -0.044507000 |
| H | -6.132265000 | 3.386601000  | -0.426244000 |
| C | -4.525720000 | 4.409340000  | 0.623543000  |
| H | -5.075182000 | 5.336356000  | 0.756357000  |
| C | -3.246298000 | 4.286343000  | 1.122050000  |
| H | -2.767904000 | 5.102166000  | 1.654683000  |
| C | -2.551922000 | 3.064633000  | 0.947825000  |
| N | -2.768283000 | -1.447944000 | 1.521872000  |
| N | -4.425744000 | -0.295029000 | -0.390224000 |
| N | -2.323435000 | -0.877495000 | -2.067591000 |
| N | -3.111585000 | 2.032395000  | 0.274757000  |
| N | -1.314840000 | 2.881686000  | 1.489322000  |
| H | -0.760902000 | 2.090945000  | 1.178066000  |
| H | -0.815258000 | 3.692192000  | 1.824485000  |
| H | 0.790930000  | -3.857705000 | -1.391514000 |
| H | 0.713300000  | -2.192990000 | -0.978640000 |
| N | -0.597833000 | -2.118566000 | 2.051413000  |
| H | -0.227151000 | -1.571106000 | 1.276034000  |
| H | -0.002825000 | -2.867289000 | 2.376042000  |
| N | 0.607765000  | 1.918591000  | -2.287300000 |
| H | 0.143998000  | 1.497813000  | -1.480029000 |
| H | -0.003636000 | 2.450692000  | -2.892489000 |

**<sup>13</sup>d<sub>oss</sub>**

|    |             |              |             |
|----|-------------|--------------|-------------|
| Cu | 2.294402000 | 0.030376000  | 0.059106000 |
| C  | 1.247357000 | 0.801199000  | 2.953153000 |
| H  | 0.279092000 | 0.790530000  | 2.466721000 |
| C  | 1.388063000 | 1.124999000  | 4.300678000 |
| H  | 0.514589000 | 1.379822000  | 4.891279000 |
| C  | 2.665395000 | 1.117610000  | 4.860647000 |
| H  | 2.813349000 | 1.370183000  | 5.906269000 |
| C  | 3.757256000 | 0.788265000  | 4.055899000 |
| H  | 4.765235000 | 0.779312000  | 4.459059000 |
| C  | 3.533975000 | 0.469127000  | 2.717549000 |
| C  | 4.649190000 | 0.047224000  | 1.784296000 |
| H  | 5.613696000 | 0.459229000  | 2.112094000 |
| H  | 4.741070000 | -1.045110000 | 1.804291000 |
| C  | 4.538665000 | 1.898166000  | 0.174148000 |

|    |              |              |              |
|----|--------------|--------------|--------------|
| H  | 5.606668000  | 2.146643000  | 0.112181000  |
| H  | 4.133213000  | 2.413898000  | 1.052019000  |
| C  | 3.804425000  | 2.360869000  | -1.063201000 |
| C  | 4.353536000  | 3.297166000  | -1.920378000 |
| H  | 5.346169000  | 3.696396000  | -1.743178000 |
| C  | 3.586204000  | 3.713426000  | -3.022264000 |
| H  | 3.982117000  | 4.445469000  | -3.719722000 |
| C  | 2.325734000  | 3.188591000  | -3.210096000 |
| H  | 1.708506000  | 3.495824000  | -4.048608000 |
| C  | 1.827105000  | 2.231610000  | -2.290484000 |
| C  | 5.113138000  | -0.358814000 | -0.594878000 |
| H  | 6.177170000  | -0.399970000 | -0.325687000 |
| H  | 5.041426000  | 0.159992000  | -1.557565000 |
| C  | 4.540903000  | -1.749571000 | -0.743547000 |
| C  | 5.356101000  | -2.831945000 | -1.019037000 |
| H  | 6.432891000  | -2.714075000 | -1.070855000 |
| C  | 4.747916000  | -4.078695000 | -1.244742000 |
| H  | 5.354532000  | -4.950231000 | -1.471466000 |
| C  | 3.375908000  | -4.189216000 | -1.177413000 |
| H  | 2.878198000  | -5.138735000 | -1.347467000 |
| C  | 2.602679000  | -3.042277000 | -0.869681000 |
| N  | 2.297345000  | 0.479937000  | 2.180144000  |
| N  | 4.348696000  | 0.443097000  | 0.388754000  |
| N  | 2.573465000  | 1.817104000  | -1.240604000 |
| N  | 3.188572000  | -1.840634000 | -0.652697000 |
| N  | 1.249711000  | -3.125619000 | -0.746888000 |
| O  | 0.459314000  | -0.525024000 | -0.133725000 |
| O  | -0.460389000 | 0.569874000  | -0.078459000 |
| Cu | -2.309320000 | 0.022189000  | -0.105088000 |
| C  | -1.850081000 | -2.048672000 | 2.373985000  |
| C  | -2.334670000 | -2.922485000 | 3.382715000  |
| H  | -1.629672000 | -3.510487000 | 3.962013000  |
| C  | -3.690798000 | -3.013163000 | 3.603931000  |
| H  | -4.075566000 | -3.683245000 | 4.366846000  |
| C  | -4.574046000 | -2.239319000 | 2.829979000  |
| H  | -5.647072000 | -2.294126000 | 2.977251000  |
| C  | -4.034070000 | -1.397015000 | 1.876149000  |
| C  | -4.916225000 | -0.487961000 | 1.049397000  |
| H  | -5.948421000 | -0.862306000 | 1.024281000  |

|   |              |              |              |
|---|--------------|--------------|--------------|
| H | -4.940764000 | 0.508584000  | 1.503317000  |
| C | -4.566039000 | -1.555829000 | -1.136042000 |
| H | -5.584224000 | -1.601830000 | -1.546068000 |
| H | -4.449720000 | -2.415555000 | -0.466420000 |
| C | -3.531858000 | -1.652816000 | -2.237676000 |
| C | -3.786301000 | -2.310992000 | -3.440629000 |
| H | -4.768185000 | -2.731135000 | -3.635900000 |
| C | -2.760825000 | -2.418032000 | -4.380578000 |
| H | -2.934882000 | -2.924476000 | -5.325178000 |
| C | -1.516003000 | -1.858444000 | -4.090889000 |
| H | -0.694658000 | -1.914056000 | -4.797525000 |
| C | -1.342347000 | -1.207394000 | -2.871644000 |
| H | -0.398775000 | -0.745922000 | -2.600237000 |
| C | -4.913657000 | 0.872126000  | -1.004038000 |
| H | -6.011783000 | 0.882385000  | -0.975147000 |
| H | -4.616174000 | 0.809673000  | -2.057682000 |
| C | -4.349899000 | 2.136089000  | -0.393681000 |
| C | -5.092582000 | 3.299271000  | -0.320841000 |
| H | -6.118893000 | 3.324364000  | -0.670168000 |
| C | -4.476558000 | 4.443612000  | 0.216572000  |
| H | -5.025110000 | 5.378275000  | 0.283278000  |
| C | -3.176270000 | 4.372439000  | 0.667738000  |
| H | -2.681234000 | 5.237629000  | 1.097189000  |
| C | -2.478826000 | 3.141472000  | 0.581766000  |
| N | -2.700417000 | -1.294869000 | 1.637142000  |
| N | -4.377743000 | -0.331488000 | -0.323818000 |
| N | -2.329660000 | -1.107915000 | -1.964737000 |
| N | -3.067101000 | 2.046570000  | 0.043536000  |
| N | -1.215431000 | 3.013042000  | 1.068419000  |
| H | -0.674887000 | 2.191595000  | 0.797629000  |
| H | -0.707033000 | 3.853383000  | 1.301403000  |
| H | 0.793058000  | -3.962520000 | -1.078133000 |
| H | 0.707278000  | -2.263795000 | -0.745523000 |
| N | -0.517593000 | -1.929237000 | 2.146094000  |
| H | -0.160510000 | -1.435214000 | 1.320475000  |
| H | 0.093289000  | -2.622877000 | 2.552030000  |
| N | 0.590771000  | 1.677785000  | -2.452237000 |
| H | 0.123664000  | 1.298883000  | -1.617441000 |
| H | -0.015672000 | 2.132289000  | -3.121633000 |



**34d**

|    |              |              |              |
|----|--------------|--------------|--------------|
| Cu | 2.385804000  | 1.207742000  | 0.167863000  |
| C  | 2.758082000  | 0.735735000  | 3.275167000  |
| H  | 1.701750000  | 0.492705000  | 3.203774000  |
| C  | 3.424548000  | 0.769665000  | 4.497673000  |
| H  | 2.892650000  | 0.550055000  | 5.417308000  |
| C  | 4.779359000  | 1.101864000  | 4.506001000  |
| H  | 5.332293000  | 1.149175000  | 5.439292000  |
| C  | 5.415612000  | 1.381688000  | 3.295938000  |
| H  | 6.467772000  | 1.648793000  | 3.269310000  |
| C  | 4.679027000  | 1.313595000  | 2.112976000  |
| C  | 5.322559000  | 1.533542000  | 0.753767000  |
| H  | 6.236763000  | 2.136358000  | 0.854722000  |
| H  | 5.627368000  | 0.559457000  | 0.354613000  |
| C  | 4.206126000  | 3.583656000  | 0.002091000  |
| H  | 5.016839000  | 4.160770000  | -0.467074000 |
| H  | 4.268993000  | 3.768453000  | 1.081331000  |
| C  | 2.854369000  | 4.067701000  | -0.484610000 |
| C  | 2.662522000  | 5.380301000  | -0.909425000 |
| H  | 3.507154000  | 6.059950000  | -0.972819000 |
| C  | 1.372731000  | 5.805903000  | -1.232471000 |
| H  | 1.199413000  | 6.827809000  | -1.556525000 |
| C  | 0.316747000  | 4.904234000  | -1.122242000 |
| H  | -0.709746000 | 5.183612000  | -1.324109000 |
| C  | 0.593810000  | 3.599877000  | -0.716635000 |
| H  | -0.197601000 | 2.868029000  | -0.611100000 |
| C  | 4.667958000  | 1.797325000  | -1.608058000 |
| H  | 5.715637000  | 2.005135000  | -1.873547000 |
| H  | 4.046307000  | 2.447670000  | -2.235439000 |
| C  | 4.334632000  | 0.349655000  | -1.918656000 |
| C  | 5.005550000  | -0.347932000 | -2.917799000 |
| H  | 5.809170000  | 0.122711000  | -3.474225000 |
| C  | 4.597311000  | -1.653626000 | -3.200318000 |
| H  | 5.064204000  | -2.212317000 | -4.005860000 |
| C  | 3.588816000  | -2.238037000 | -2.446096000 |
| H  | 3.241388000  | -3.238940000 | -2.663273000 |
| C  | 3.016296000  | -1.500365000 | -1.397941000 |
| N  | 3.369280000  | 0.999207000  | 2.110811000  |
| N  | 4.377009000  | 2.135639000  | -0.204960000 |

|    |              |              |              |
|----|--------------|--------------|--------------|
| N  | 1.834429000  | 3.186001000  | -0.410301000 |
| N  | 3.347378000  | -0.209722000 | -1.188558000 |
| N  | 2.021869000  | -1.985767000 | -0.554401000 |
| O  | 0.686746000  | 0.309113000  | 0.711978000  |
| O  | -0.497218000 | 0.521119000  | 0.066498000  |
| Cu | -1.571023000 | -1.135276000 | -0.137620000 |
| C  | -1.509538000 | -0.736273000 | 2.907096000  |
| H  | -1.033119000 | 0.198840000  | 2.632787000  |
| C  | -1.824759000 | -1.047020000 | 4.226566000  |
| H  | -1.596919000 | -0.344432000 | 5.021098000  |
| C  | -2.448259000 | -2.266776000 | 4.493237000  |
| H  | -2.717045000 | -2.540552000 | 5.509087000  |
| C  | -2.732180000 | -3.128761000 | 3.434550000  |
| H  | -3.221028000 | -4.082494000 | 3.608559000  |
| C  | -2.378669000 | -2.750929000 | 2.138833000  |
| C  | -2.574196000 | -3.678437000 | 0.953284000  |
| H  | -1.657187000 | -4.264324000 | 0.849195000  |
| H  | -3.400088000 | -4.376142000 | 1.146719000  |
| C  | -2.215157000 | -3.620560000 | -1.503859000 |
| H  | -2.895992000 | -4.387112000 | -1.898557000 |
| H  | -1.292144000 | -4.115600000 | -1.191298000 |
| C  | -1.867233000 | -2.612644000 | -2.584501000 |
| C  | -1.963960000 | -2.904713000 | -3.944266000 |
| H  | -2.345637000 | -3.868601000 | -4.266560000 |
| C  | -1.570436000 | -1.942613000 | -4.875906000 |
| H  | -1.643498000 | -2.149587000 | -5.939339000 |
| C  | -1.095587000 | -0.711185000 | -4.423282000 |
| H  | -0.789296000 | 0.065380000  | -5.115881000 |
| C  | -1.033482000 | -0.486713000 | -3.050867000 |
| H  | -0.683148000 | 0.451918000  | -2.633728000 |
| C  | -4.205821000 | -2.581579000 | -0.545939000 |
| H  | -4.853043000 | -3.436480000 | -0.307624000 |
| H  | -4.317614000 | -2.380779000 | -1.616992000 |
| C  | -4.667502000 | -1.344007000 | 0.195144000  |
| C  | -5.865132000 | -1.319710000 | 0.901828000  |
| H  | -6.472657000 | -2.213720000 | 0.997586000  |
| C  | -6.256168000 | -0.113453000 | 1.492191000  |
| H  | -7.165393000 | -0.059721000 | 2.083356000  |
| C  | -5.463475000 | 1.014389000  | 1.332595000  |

|   |              |              |              |
|---|--------------|--------------|--------------|
| H | -5.723963000 | 1.949982000  | 1.808088000  |
| C | -4.293494000 | 0.913852000  | 0.561188000  |
| N | -1.777343000 | -1.571741000 | 1.890615000  |
| N | -2.781573000 | -2.938668000 | -0.314794000 |
| N | -1.408719000 | -1.416298000 | -2.157338000 |
| N | -3.891659000 | -0.255630000 | 0.037907000  |
| N | -3.409673000 | 1.983248000  | 0.347931000  |
| H | -2.432434000 | 1.692431000  | 0.321556000  |
| H | 1.408491000  | -1.255577000 | -0.169506000 |
| C | -3.511224000 | 3.299779000  | -0.124524000 |
| O | -2.443139000 | 3.886524000  | -0.259781000 |
| C | -4.840136000 | 4.002962000  | -0.489638000 |
| C | -4.483199000 | 5.154035000  | -1.457688000 |
| H | -5.395810000 | 5.698879000  | -1.719487000 |
| H | -3.778316000 | 5.853548000  | -1.004713000 |
| H | -4.037389000 | 4.773181000  | -2.382742000 |
| C | -5.447373000 | 4.633618000  | 0.788385000  |
| H | -6.338056000 | 5.211036000  | 0.518579000  |
| H | -5.751252000 | 3.894368000  | 1.534790000  |
| H | -4.733020000 | 5.315702000  | 1.260823000  |
| C | -5.855045000 | 3.084308000  | -1.203805000 |
| H | -6.309856000 | 2.337892000  | -0.551202000 |
| H | -6.668285000 | 3.699654000  | -1.602404000 |
| H | -5.393578000 | 2.563666000  | -2.051417000 |
| C | 1.608670000  | -3.257220000 | -0.159089000 |
| O | 0.422613000  | -3.357517000 | 0.162469000  |
| C | 2.560253000  | -4.464615000 | 0.031944000  |
| C | 2.119058000  | -5.141984000 | 1.355940000  |
| H | 1.072934000  | -5.450566000 | 1.318082000  |
| H | 2.738659000  | -6.027379000 | 1.528846000  |
| H | 2.247134000  | -4.467037000 | 2.209431000  |
| C | 4.050221000  | -4.095902000 | 0.173453000  |
| H | 4.600891000  | -4.980994000 | 0.507815000  |
| H | 4.512446000  | -3.766859000 | -0.758431000 |
| H | 4.197407000  | -3.313813000 | 0.926920000  |
| C | 2.340264000  | -5.477693000 | -1.117619000 |
| H | 2.652596000  | -5.094150000 | -2.094635000 |
| H | 2.925744000  | -6.381914000 | -0.921788000 |
| H | 1.286449000  | -5.766994000 | -1.185810000 |

**<sup>14</sup>d<sub>CSS</sub>**

|    |              |              |              |
|----|--------------|--------------|--------------|
| Cu | 2.403223000  | 1.257222000  | 0.205844000  |
| C  | 2.700926000  | 0.529890000  | 3.239398000  |
| H  | 1.646948000  | 0.292375000  | 3.131882000  |
| C  | 3.346195000  | 0.459572000  | 4.471104000  |
| H  | 2.798299000  | 0.162379000  | 5.358967000  |
| C  | 4.700542000  | 0.788412000  | 4.531340000  |
| H  | 5.237294000  | 0.756695000  | 5.474645000  |
| C  | 5.357428000  | 1.164930000  | 3.359840000  |
| H  | 6.410619000  | 1.428787000  | 3.372974000  |
| C  | 4.643615000  | 1.196420000  | 2.161230000  |
| C  | 5.324173000  | 1.509975000  | 0.839248000  |
| H  | 6.226974000  | 2.115189000  | 1.007915000  |
| H  | 5.655275000  | 0.564579000  | 0.394899000  |
| C  | 4.212765000  | 3.590416000  | 0.152123000  |
| H  | 5.035102000  | 4.198099000  | -0.253835000 |
| H  | 4.226169000  | 3.723087000  | 1.240863000  |
| C  | 2.878380000  | 4.079594000  | -0.375729000 |
| C  | 2.690250000  | 5.394491000  | -0.793356000 |
| H  | 3.528369000  | 6.084775000  | -0.806473000 |
| C  | 1.414029000  | 5.807313000  | -1.182377000 |
| H  | 1.246287000  | 6.830181000  | -1.506253000 |
| C  | 0.365456000  | 4.891171000  | -1.145951000 |
| H  | -0.649564000 | 5.154150000  | -1.415980000 |
| C  | 0.635947000  | 3.586616000  | -0.735365000 |
| H  | -0.153183000 | 2.843902000  | -0.690964000 |
| C  | 4.745496000  | 1.882607000  | -1.524928000 |
| H  | 5.802042000  | 2.103340000  | -1.740599000 |
| H  | 4.147489000  | 2.564242000  | -2.141718000 |
| C  | 4.424095000  | 0.452742000  | -1.923808000 |
| C  | 5.114407000  | -0.178180000 | -2.955069000 |
| H  | 5.928049000  | 0.326218000  | -3.465850000 |
| C  | 4.709887000  | -1.460972000 | -3.329912000 |
| H  | 5.191600000  | -1.966919000 | -4.161185000 |
| C  | 3.682983000  | -2.090151000 | -2.637470000 |
| H  | 3.335979000  | -3.071286000 | -2.930458000 |
| C  | 3.092686000  | -1.420605000 | -1.555238000 |
| N  | 3.331906000  | 0.889318000  | 2.110669000  |

|    |              |              |              |
|----|--------------|--------------|--------------|
| N  | 4.407677000  | 2.154956000  | -0.117576000 |
| N  | 1.861265000  | 3.189118000  | -0.362546000 |
| N  | 3.427933000  | -0.151007000 | -1.248698000 |
| N  | 2.065586000  | -1.939726000 | -0.765930000 |
| O  | 0.700858000  | 0.285273000  | 0.549859000  |
| O  | -0.403116000 | 0.428274000  | -0.203244000 |
| Cu | -1.614487000 | -1.132896000 | -0.054258000 |
| C  | -1.358436000 | -0.453536000 | 2.906842000  |
| H  | -0.903539000 | 0.452903000  | 2.520235000  |
| C  | -1.597561000 | -0.639418000 | 4.265807000  |
| H  | -1.343896000 | 0.141187000  | 4.975272000  |
| C  | -2.181497000 | -1.836834000 | 4.681434000  |
| H  | -2.390707000 | -2.015251000 | 5.731935000  |
| C  | -2.501560000 | -2.802332000 | 3.727152000  |
| H  | -2.955771000 | -3.744300000 | 4.018832000  |
| C  | -2.230164000 | -2.545827000 | 2.382951000  |
| C  | -2.466720000 | -3.582915000 | 1.299995000  |
| H  | -1.524844000 | -4.121590000 | 1.160354000  |
| H  | -3.226116000 | -4.307441000 | 1.625397000  |
| C  | -2.351205000 | -3.725805000 | -1.177600000 |
| H  | -3.050747000 | -4.525457000 | -1.457900000 |
| H  | -1.396197000 | -4.186835000 | -0.912369000 |
| C  | -2.107552000 | -2.797104000 | -2.354045000 |
| C  | -2.311674000 | -3.189100000 | -3.676379000 |
| H  | -2.714373000 | -4.173394000 | -3.895006000 |
| C  | -1.992962000 | -2.301275000 | -4.705691000 |
| H  | -2.149742000 | -2.586667000 | -5.741584000 |
| C  | -1.480143000 | -1.044116000 | -4.385530000 |
| H  | -1.224419000 | -0.324708000 | -5.156045000 |
| C  | -1.310241000 | -0.719396000 | -3.041943000 |
| H  | -0.916576000 | 0.241224000  | -2.722952000 |
| C  | -4.267898000 | -2.643438000 | -0.112158000 |
| H  | -4.874188000 | -3.461445000 | 0.300977000  |
| H  | -4.499083000 | -2.581914000 | -1.181281000 |
| C  | -4.674308000 | -1.320849000 | 0.508328000  |
| C  | -5.826764000 | -1.201709000 | 1.278786000  |
| H  | -6.428158000 | -2.072813000 | 1.517597000  |
| C  | -6.181224000 | 0.069604000  | 1.741131000  |
| H  | -7.053998000 | 0.200618000  | 2.373739000  |

|   |              |              |              |
|---|--------------|--------------|--------------|
| C | -5.399197000 | 1.165423000  | 1.401518000  |
| H | -5.632360000 | 2.152286000  | 1.776729000  |
| C | -4.278139000 | 0.962684000  | 0.580645000  |
| N | -1.667390000 | -1.384854000 | 1.991398000  |
| N | -2.823930000 | -2.966845000 | 0.003535000  |
| N | -1.619438000 | -1.574103000 | -2.056946000 |
| N | -3.910663000 | -0.263825000 | 0.176938000  |
| N | -3.397126000 | 1.985638000  | 0.189745000  |
| H | -2.434153000 | 1.659662000  | 0.111473000  |
| H | 1.467344000  | -1.207320000 | -0.363277000 |
| C | -3.504786000 | 3.230030000  | -0.448229000 |
| O | -2.435661000 | 3.746546000  | -0.756413000 |
| C | -4.839030000 | 3.937888000  | -0.776704000 |
| C | -4.534209000 | 4.981526000  | -1.875469000 |
| H | -5.453600000 | 5.522941000  | -2.120697000 |
| H | -3.783964000 | 5.702973000  | -1.546218000 |
| H | -4.166100000 | 4.503258000  | -2.788921000 |
| C | -5.331142000 | 4.704315000  | 0.476196000  |
| H | -6.230556000 | 5.274239000  | 0.219912000  |
| H | -5.585650000 | 4.051008000  | 1.315087000  |
| H | -4.570429000 | 5.412496000  | 0.820924000  |
| C | -5.924146000 | 2.983679000  | -1.320837000 |
| H | -6.326873000 | 2.300607000  | -0.571817000 |
| H | -6.762012000 | 3.580407000  | -1.695782000 |
| H | -5.545191000 | 2.388810000  | -2.160317000 |
| C | 1.649430000  | -3.201417000 | -0.355665000 |
| O | 0.490863000  | -3.268824000 | 0.066230000  |
| C | 2.561734000  | -4.451891000 | -0.289097000 |
| C | 2.108468000  | -5.255878000 | 0.955240000  |
| H | 1.059694000  | -5.549636000 | 0.883600000  |
| H | 2.717772000  | -6.161264000 | 1.037906000  |
| H | 2.238353000  | -4.674093000 | 1.874192000  |
| C | 4.060437000  | -4.131839000 | -0.114081000 |
| H | 4.595446000  | -5.059375000 | 0.113727000  |
| H | 4.526632000  | -3.704600000 | -1.002772000 |
| H | 4.223832000  | -3.444799000 | 0.724296000  |
| C | 2.315703000  | -5.336405000 | -1.536123000 |
| H | 2.636525000  | -4.867088000 | -2.471119000 |
| H | 2.875286000  | -6.272016000 | -1.433084000 |

|                                     |              |              |              |
|-------------------------------------|--------------|--------------|--------------|
| H                                   | 1.254115000  | -5.588527000 | -1.630781000 |
| <b><sup>14</sup>d<sub>oss</sub></b> |              |              |              |
| Cu                                  | 2.356283000  | 1.239104000  | 0.166418000  |
| C                                   | 2.671209000  | 0.686176000  | 3.250049000  |
| H                                   | 1.617548000  | 0.443068000  | 3.151066000  |
| C                                   | 3.318311000  | 0.686970000  | 4.483194000  |
| H                                   | 2.772389000  | 0.440538000  | 5.387652000  |
| C                                   | 4.672279000  | 1.020952000  | 4.523174000  |
| H                                   | 5.209345000  | 1.043361000  | 5.466591000  |
| C                                   | 5.329084000  | 1.333668000  | 3.332301000  |
| H                                   | 6.381457000  | 1.601053000  | 3.330538000  |
| C                                   | 4.612320000  | 1.296840000  | 2.136074000  |
| C                                   | 5.275931000  | 1.545170000  | 0.792677000  |
| H                                   | 6.179359000  | 2.159476000  | 0.915223000  |
| H                                   | 5.599574000  | 0.580889000  | 0.385066000  |
| C                                   | 4.160715000  | 3.597771000  | 0.040422000  |
| H                                   | 4.984921000  | 4.177951000  | -0.399505000 |
| H                                   | 4.189929000  | 3.772005000  | 1.122821000  |
| C                                   | 2.823848000  | 4.075968000  | -0.487632000 |
| C                                   | 2.633207000  | 5.382518000  | -0.928231000 |
| H                                   | 3.471883000  | 6.071129000  | -0.968226000 |
| C                                   | 1.350074000  | 5.790164000  | -1.299707000 |
| H                                   | 1.176832000  | 6.807484000  | -1.637851000 |
| C                                   | 0.300763000  | 4.878048000  | -1.220464000 |
| H                                   | -0.720519000 | 5.146075000  | -1.459290000 |
| C                                   | 0.575505000  | 3.579379000  | -0.794140000 |
| H                                   | -0.207318000 | 2.835463000  | -0.710324000 |
| C                                   | 4.668571000  | 1.829075000  | -1.577682000 |
| H                                   | 5.723624000  | 2.041073000  | -1.806319000 |
| H                                   | 4.066292000  | 2.488978000  | -2.213503000 |
| C                                   | 4.341430000  | 0.386102000  | -1.914794000 |
| C                                   | 5.011804000  | -0.295463000 | -2.925243000 |
| H                                   | 5.817268000  | 0.180911000  | -3.474169000 |
| C                                   | 4.597609000  | -1.594946000 | -3.228910000 |
| H                                   | 5.063387000  | -2.141973000 | -4.043091000 |
| C                                   | 3.584819000  | -2.188476000 | -2.487098000 |
| H                                   | 3.233497000  | -3.183615000 | -2.723493000 |
| C                                   | 3.013608000  | -1.466965000 | -1.426643000 |
| N                                   | 3.302864000  | 0.983078000  | 2.104711000  |

|    |              |              |              |
|----|--------------|--------------|--------------|
| N  | 4.338577000  | 2.149375000  | -0.175921000 |
| N  | 1.809094000  | 3.185116000  | -0.441296000 |
| N  | 3.354397000  | -0.182804000 | -1.195253000 |
| N  | 2.010391000  | -1.948340000 | -0.592703000 |
| O  | 0.704083000  | 0.290320000  | 0.632335000  |
| O  | -0.470723000 | 0.484410000  | -0.099550000 |
| Cu | -1.541386000 | -1.160789000 | -0.121866000 |
| C  | -1.420856000 | -0.566826000 | 2.864876000  |
| H  | -0.955041000 | 0.348315000  | 2.515380000  |
| C  | -1.701066000 | -0.796741000 | 4.208705000  |
| H  | -1.462225000 | -0.042919000 | 4.951412000  |
| C  | -2.305467000 | -2.002580000 | 4.567695000  |
| H  | -2.545920000 | -2.213388000 | 5.605445000  |
| C  | -2.607717000 | -2.933155000 | 3.573902000  |
| H  | -3.081897000 | -3.878019000 | 3.821043000  |
| C  | -2.292711000 | -2.634804000 | 2.248013000  |
| C  | -2.511957000 | -3.630946000 | 1.124109000  |
| H  | -1.593776000 | -4.216390000 | 1.027977000  |
| H  | -3.328440000 | -4.320368000 | 1.376853000  |
| C  | -2.230284000 | -3.710246000 | -1.346046000 |
| H  | -2.927898000 | -4.491507000 | -1.676815000 |
| H  | -1.299514000 | -4.192337000 | -1.037197000 |
| C  | -1.914029000 | -2.759207000 | -2.485940000 |
| C  | -2.035780000 | -3.118631000 | -3.827302000 |
| H  | -2.418469000 | -4.098600000 | -4.095352000 |
| C  | -1.663596000 | -2.201022000 | -4.811543000 |
| H  | -1.756134000 | -2.459750000 | -5.862067000 |
| C  | -1.183001000 | -0.948066000 | -4.429160000 |
| H  | -0.890908000 | -0.206864000 | -5.165275000 |
| C  | -1.095255000 | -0.655992000 | -3.070755000 |
| H  | -0.735301000 | 0.298337000  | -2.699485000 |
| C  | -4.189435000 | -2.619830000 | -0.386465000 |
| H  | -4.824180000 | -3.464620000 | -0.087055000 |
| H  | -4.330289000 | -2.474262000 | -1.462906000 |
| C  | -4.633423000 | -1.347493000 | 0.302883000  |
| C  | -5.808783000 | -1.284458000 | 1.043403000  |
| H  | -6.415360000 | -2.170154000 | 1.201777000  |
| C  | -6.177904000 | -0.048119000 | 1.584650000  |
| H  | -7.068711000 | 0.038972000  | 2.199435000  |



|   |              |              |              |
|---|--------------|--------------|--------------|
| C | -5.386130000 | 1.066434000  | 1.347198000  |
| H | -5.627731000 | 2.025150000  | 1.785433000  |
| C | -4.240473000 | 0.922856000  | 0.545684000  |
| N | -1.708359000 | -1.468493000 | 1.912650000  |
| N | -2.756212000 | -2.961393000 | -0.177329000 |
| N | -1.453712000 | -1.541742000 | -2.128877000 |
| N | -3.860797000 | -0.271973000 | 0.066964000  |
| N | -3.358403000 | 1.972807000  | 0.256625000  |
| H | -2.380291000 | 1.678539000  | 0.221462000  |
| H | 1.414030000  | -1.201806000 | -0.192629000 |
| C | -3.479349000 | 3.288667000  | -0.206945000 |
| O | -2.422365000 | 3.898037000  | -0.330775000 |
| C | -4.815645000 | 3.965207000  | -0.600348000 |
| C | -4.464326000 | 5.065106000  | -1.629849000 |
| H | -5.379146000 | 5.593561000  | -1.916700000 |
| H | -3.759321000 | 5.788570000  | -1.216705000 |
| H | -4.021805000 | 4.636433000  | -2.535575000 |
| C | -5.416436000 | 4.663762000  | 0.644881000  |
| H | -6.300514000 | 5.237026000  | 0.345987000  |
| H | -5.730100000 | 3.964381000  | 1.425216000  |
| H | -4.694831000 | 5.359867000  | 1.084611000  |
| C | -5.835575000 | 3.013990000  | -1.261229000 |
| H | -6.289599000 | 2.302833000  | -0.569687000 |
| H | -6.649416000 | 3.610880000  | -1.685778000 |
| H | -5.379961000 | 2.450298000  | -2.084031000 |
| C | 1.598593000  | -3.210261000 | -0.181319000 |
| O | 0.420089000  | -3.298538000 | 0.176994000  |
| C | 2.538162000  | -4.432158000 | -0.019699000 |
| C | 2.103283000  | -5.134145000 | 1.292744000  |
| H | 1.055909000  | -5.438820000 | 1.256567000  |
| H | 2.720395000  | -6.025292000 | 1.443706000  |
| H | 2.239206000  | -4.477089000 | 2.158813000  |
| C | 4.032502000  | -4.078443000 | 0.117617000  |
| H | 4.578944000  | -4.974098000 | 0.430136000  |
| H | 4.490236000  | -3.734001000 | -0.810773000 |
| H | 4.191324000  | -3.312711000 | 0.885501000  |
| C | 2.301677000  | -5.420092000 | -1.187882000 |
| H | 2.606683000  | -5.019006000 | -2.159928000 |
| H | 2.882913000  | -6.331927000 | -1.015863000 |

|            |              |              |              |
|------------|--------------|--------------|--------------|
| H          | 1.245471000  | -5.702012000 | -1.252477000 |
| <b>35d</b> |              |              |              |
| Cu         | 0.686663000  | -2.181443000 | 0.040066000  |
| C          | 0.880698000  | -1.449666000 | -2.992399000 |
| H          | 0.432149000  | -0.522961000 | -2.654325000 |
| C          | 1.150781000  | -1.698942000 | -4.336513000 |
| H          | 0.900822000  | -0.957625000 | -5.087773000 |
| C          | 1.735107000  | -2.914747000 | -4.689193000 |
| H          | 1.953566000  | -3.143113000 | -5.727989000 |
| C          | 2.030265000  | -3.842698000 | -3.688819000 |
| H          | 2.480332000  | -4.800886000 | -3.929122000 |
| C          | 1.726989000  | -3.518535000 | -2.368988000 |
| C          | 2.012758000  | -4.437994000 | -1.202246000 |
| H          | 2.070435000  | -5.486485000 | -1.525478000 |
| H          | 2.979758000  | -4.175620000 | -0.758525000 |
| C          | -0.319896000 | -4.837591000 | -0.583978000 |
| H          | -0.288113000 | -5.935686000 | -0.548445000 |
| H          | -0.483445000 | -4.546786000 | -1.627375000 |
| C          | -1.469857000 | -4.313568000 | 0.244639000  |
| C          | -2.605106000 | -5.092416000 | 0.432365000  |
| H          | -2.650408000 | -6.103050000 | 0.040741000  |
| C          | -3.690254000 | -4.523412000 | 1.101456000  |
| H          | -4.613402000 | -5.080587000 | 1.229597000  |
| C          | -3.585095000 | -3.229519000 | 1.585103000  |
| H          | -4.427005000 | -2.746246000 | 2.061237000  |
| C          | -2.375648000 | -2.529921000 | 1.425661000  |
| C          | 1.407101000  | -4.780051000 | 1.159387000  |
| H          | 1.834191000  | -5.787840000 | 1.062581000  |
| H          | 0.512802000  | -4.868572000 | 1.785719000  |
| C          | 2.391118000  | -3.851327000 | 1.838669000  |
| C          | 3.312881000  | -4.346264000 | 2.750108000  |
| H          | 3.386131000  | -5.411589000 | 2.940952000  |
| C          | 4.111144000  | -3.426601000 | 3.436774000  |
| H          | 4.810927000  | -3.764997000 | 4.194942000  |
| C          | 3.999405000  | -2.075668000 | 3.156234000  |
| H          | 4.582916000  | -1.352385000 | 3.704758000  |
| C          | 3.103915000  | -1.647340000 | 2.157202000  |
| N          | 1.161437000  | -2.342895000 | -2.036594000 |
| N          | 0.974482000  | -4.261918000 | -0.156654000 |

|    |              |              |              |
|----|--------------|--------------|--------------|
| N  | -1.340620000 | -3.061452000 | 0.734060000  |
| N  | 2.279952000  | -2.536467000 | 1.545616000  |
| N  | 2.916313000  | -0.330166000 | 1.786682000  |
| O  | 0.614592000  | -0.257532000 | 0.073300000  |
| O  | -0.754874000 | 0.151149000  | -0.054415000 |
| Cu | -1.120502000 | 2.006665000  | 0.257680000  |
| C  | 1.549951000  | 3.122209000  | -1.617927000 |
| C  | 2.346432000  | 4.228322000  | -1.977710000 |
| H  | 3.397228000  | 4.093133000  | -2.178756000 |
| C  | 1.779711000  | 5.488601000  | -2.031316000 |
| H  | 2.384978000  | 6.344696000  | -2.313685000 |
| C  | 0.435246000  | 5.652399000  | -1.682906000 |
| H  | -0.039512000 | 6.627493000  | -1.705525000 |
| C  | -0.264439000 | 4.531546000  | -1.257446000 |
| C  | -1.696262000 | 4.649961000  | -0.779414000 |
| H  | -1.985111000 | 5.704973000  | -0.682493000 |
| H  | -2.372790000 | 4.183037000  | -1.500723000 |
| C  | -1.121003000 | 4.620096000  | 1.608261000  |
| H  | -1.750971000 | 5.377324000  | 2.093134000  |
| H  | -0.274450000 | 5.150220000  | 1.158729000  |
| C  | -0.580882000 | 3.632548000  | 2.616393000  |
| C  | -0.270059000 | 4.006111000  | 3.922893000  |
| H  | -0.473658000 | 5.016484000  | 4.263964000  |
| C  | 0.308121000  | 3.064337000  | 4.772433000  |
| H  | 0.563703000  | 3.332076000  | 5.793198000  |
| C  | 0.545730000  | 1.776773000  | 4.292804000  |
| H  | 0.993766000  | 1.014846000  | 4.921494000  |
| C  | 0.191653000  | 1.477053000  | 2.981652000  |
| H  | 0.335022000  | 0.490578000  | 2.560065000  |
| C  | -3.283064000 | 3.721079000  | 0.879086000  |
| H  | -3.834545000 | 4.671714000  | 0.891748000  |
| H  | -3.297574000 | 3.305802000  | 1.893459000  |
| C  | -3.951231000 | 2.729750000  | -0.047931000 |
| C  | -5.324856000 | 2.754050000  | -0.246578000 |
| H  | -5.936075000 | 3.525764000  | 0.208882000  |
| C  | -5.892608000 | 1.732814000  | -1.012799000 |
| H  | -6.968453000 | 1.683370000  | -1.151424000 |
| C  | -5.077225000 | 0.769545000  | -1.585047000 |
| H  | -5.501911000 | -0.053801000 | -2.141122000 |

|   |              |              |              |
|---|--------------|--------------|--------------|
| C | -3.683669000 | 0.856928000  | -1.414730000 |
| N | 0.269594000  | 3.289570000  | -1.218401000 |
| N | -1.862966000 | 3.941970000  | 0.516251000  |
| N | -0.354126000 | 2.386271000  | 2.162584000  |
| N | -3.143604000 | 1.811518000  | -0.619419000 |
| N | -2.779090000 | -0.042840000 | -1.955604000 |
| H | -1.932118000 | -0.157192000 | -1.378116000 |
| H | 2.026372000  | -0.166948000 | 1.304046000  |
| N | 2.029720000  | 1.818406000  | -1.593410000 |
| H | 1.559735000  | 1.199090000  | -0.920894000 |
| N | -2.188969000 | -1.226550000 | 1.868639000  |
| H | -1.650059000 | -0.651290000 | 1.189314000  |
| C | 3.652669000  | 0.878080000  | 1.793712000  |
| O | 2.981553000  | 1.882474000  | 1.599799000  |
| C | 3.229868000  | 1.214909000  | -2.029454000 |
| O | 3.622186000  | 0.265651000  | -1.361844000 |
| C | -2.857723000 | -1.046329000 | -2.938662000 |
| O | -2.147093000 | -2.028968000 | -2.758622000 |
| C | -2.888726000 | -0.428813000 | 2.781012000  |
| O | -2.972858000 | 0.768488000  | 2.511720000  |
| C | 3.958104000  | 1.568641000  | -3.358571000 |
| C | 3.063284000  | 2.244998000  | -4.416657000 |
| C | 5.233017000  | 2.399458000  | -3.065641000 |
| C | 4.442296000  | 0.218561000  | -3.947396000 |
| H | 2.148202000  | 1.666309000  | -4.587906000 |
| H | 2.771950000  | 3.266480000  | -4.167486000 |
| H | 3.607184000  | 2.289444000  | -5.366073000 |
| H | 5.871022000  | 1.879344000  | -2.344450000 |
| H | 5.802702000  | 2.521207000  | -3.993132000 |
| H | 5.036439000  | 3.402577000  | -2.676794000 |
| H | 5.003359000  | 0.410225000  | -4.867834000 |
| H | 5.088248000  | -0.309444000 | -3.244299000 |
| H | 3.599732000  | -0.434900000 | -4.192002000 |
| C | 5.188947000  | 0.979714000  | 1.947916000  |
| C | 5.548264000  | 1.183825000  | 3.441479000  |
| C | 5.953190000  | -0.201228000 | 1.313816000  |
| C | 5.615210000  | 2.265736000  | 1.200069000  |
| H | 5.034111000  | 2.063739000  | 3.842219000  |
| H | 5.299584000  | 0.332837000  | 4.082378000  |

|   |              |              |              |
|---|--------------|--------------|--------------|
| H | 6.626531000  | 1.351975000  | 3.532733000  |
| H | 5.638110000  | -0.347221000 | 0.275553000  |
| H | 7.023890000  | 0.029545000  | 1.313748000  |
| H | 5.832714000  | -1.146937000 | 1.844718000  |
| H | 6.696142000  | 2.402468000  | 1.308644000  |
| H | 5.384613000  | 2.189211000  | 0.133500000  |
| H | 5.107664000  | 3.146899000  | 1.596561000  |
| C | -3.395135000 | -0.939358000 | 4.155841000  |
| C | -4.942917000 | -0.949483000 | 4.155411000  |
| C | -2.827560000 | -2.301819000 | 4.598754000  |
| C | -2.932550000 | 0.119402000  | 5.190421000  |
| H | -5.335309000 | 0.025276000  | 3.849859000  |
| H | -5.367827000 | -1.710956000 | 3.492585000  |
| H | -5.306487000 | -1.162788000 | 5.166166000  |
| H | -1.733603000 | -2.319643000 | 4.531408000  |
| H | -3.094965000 | -2.472313000 | 5.646825000  |
| H | -3.218728000 | -3.146600000 | 4.029074000  |
| H | -3.311547000 | -0.153226000 | 6.180553000  |
| H | -1.839433000 | 0.165937000  | 5.248184000  |
| H | -3.303986000 | 1.112501000  | 4.931712000  |
| C | -3.643626000 | -0.890246000 | -4.266999000 |
| C | -4.900447000 | -1.793541000 | -4.225366000 |
| C | -4.000481000 | 0.561638000  | -4.641552000 |
| C | -2.709338000 | -1.441873000 | -5.374085000 |
| H | -4.625357000 | -2.824565000 | -3.982216000 |
| H | -5.648805000 | -1.462496000 | -3.497656000 |
| H | -5.382409000 | -1.791115000 | -5.208613000 |
| H | -3.116226000 | 1.208601000  | -4.610652000 |
| H | -4.383623000 | 0.578470000  | -5.667224000 |
| H | -4.769575000 | 1.006154000  | -4.007782000 |
| H | -3.233052000 | -1.416174000 | -6.335003000 |
| H | -1.805167000 | -0.829328000 | -5.467971000 |
| H | -2.408071000 | -2.468904000 | -5.161872000 |

**<sup>15</sup>d<sub>CSS</sub>**

|    |              |              |              |
|----|--------------|--------------|--------------|
| Cu | -0.399770000 | -2.324896000 | -0.123665000 |
| C  | 0.990565000  | -1.438906000 | -2.759538000 |
| H  | 0.894136000  | -0.451249000 | -2.318612000 |
| C  | 1.486056000  | -1.624502000 | -4.048563000 |

|    |              |              |              |
|----|--------------|--------------|--------------|
| H  | 1.783323000  | -0.768912000 | -4.645455000 |
| C  | 1.577305000  | -2.922494000 | -4.547992000 |
| H  | 1.950745000  | -3.106729000 | -5.550837000 |
| C  | 1.171820000  | -3.986376000 | -3.741574000 |
| H  | 1.223780000  | -5.009866000 | -4.099832000 |
| C  | 0.689083000  | -3.717111000 | -2.462528000 |
| C  | 0.270992000  | -4.816788000 | -1.509424000 |
| H  | -0.006668000 | -5.726473000 | -2.060913000 |
| H  | 1.123623000  | -5.073373000 | -0.871039000 |
| C  | -2.123324000 | -4.331302000 | -1.331428000 |
| H  | -2.525173000 | -5.344973000 | -1.478156000 |
| H  | -1.948277000 | -3.899194000 | -2.323748000 |
| C  | -3.135117000 | -3.463707000 | -0.613453000 |
| C  | -4.496495000 | -3.711441000 | -0.746718000 |
| H  | -4.847926000 | -4.569486000 | -1.309844000 |
| C  | -5.389907000 | -2.806759000 | -0.169537000 |
| H  | -6.461051000 | -2.939270000 | -0.288811000 |
| C  | -4.901107000 | -1.723882000 | 0.545309000  |
| H  | -5.572537000 | -0.984550000 | 0.958722000  |
| C  | -3.512212000 | -1.585216000 | 0.706663000  |
| C  | -0.876307000 | -5.103134000 | 0.647164000  |
| H  | -0.864254000 | -6.190270000 | 0.480844000  |
| H  | -1.830472000 | -4.863496000 | 1.128622000  |
| C  | 0.259018000  | -4.705118000 | 1.571498000  |
| C  | 0.773138000  | -5.609052000 | 2.492166000  |
| H  | 0.401768000  | -6.627371000 | 2.536006000  |
| C  | 1.760567000  | -5.156241000 | 3.371175000  |
| H  | 2.158702000  | -5.815634000 | 4.136529000  |
| C  | 2.233386000  | -3.857643000 | 3.268709000  |
| H  | 2.977299000  | -3.492252000 | 3.959134000  |
| C  | 1.721491000  | -3.017139000 | 2.262920000  |
| N  | 0.600227000  | -2.457939000 | -1.988910000 |
| N  | -0.826467000 | -4.365429000 | -0.630413000 |
| N  | -2.646875000 | -2.432073000 | 0.105741000  |
| N  | 0.709305000  | -3.436730000 | 1.464566000  |
| N  | 2.112587000  | -1.706057000 | 2.038546000  |
| O  | -0.135075000 | -0.486330000 | 0.533417000  |
| O  | 0.206199000  | 0.495673000  | -0.335651000 |
| Cu | 0.020781000  | 2.353494000  | 0.264567000  |

|   |              |             |              |
|---|--------------|-------------|--------------|
| C | 3.000877000  | 2.736491000 | -1.150509000 |
| C | 4.102890000  | 3.558724000 | -1.453219000 |
| H | 5.072527000  | 3.127162000 | -1.635971000 |
| C | 3.940451000  | 4.933262000 | -1.479396000 |
| H | 4.786742000  | 5.572060000 | -1.713114000 |
| C | 2.696570000  | 5.488754000 | -1.170491000 |
| H | 2.541867000  | 6.562247000 | -1.167684000 |
| C | 1.666344000  | 4.624550000 | -0.826083000 |
| C | 0.306064000  | 5.160900000 | -0.431873000 |
| H | 0.365400000  | 6.240014000 | -0.230290000 |
| H | -0.397493000 | 5.019307000 | -1.258864000 |
| C | 0.538067000  | 4.692341000 | 1.970272000  |
| H | 0.206101000  | 5.623322000 | 2.451521000  |
| H | 1.587955000  | 4.832621000 | 1.689896000  |
| C | 0.443737000  | 3.526313000 | 2.929732000  |
| C | 0.555129000  | 3.692169000 | 4.308908000  |
| H | 0.667141000  | 4.686533000 | 4.730101000  |
| C | 0.521365000  | 2.564519000 | 5.129206000  |
| H | 0.609732000  | 2.668182000 | 6.206496000  |
| C | 0.363408000  | 1.309474000 | 4.544596000  |
| H | 0.327750000  | 0.406898000 | 5.145230000  |
| C | 0.246148000  | 1.230772000 | 3.159227000  |
| H | 0.107365000  | 0.283817000 | 2.649737000  |
| C | -1.674915000 | 4.618414000 | 0.931539000  |
| H | -1.928243000 | 5.687358000 | 0.991506000  |
| H | -1.938104000 | 4.159810000 | 1.891770000  |
| C | -2.496084000 | 3.942463000 | -0.144186000 |
| C | -3.763233000 | 4.416826000 | -0.463024000 |
| H | -4.145050000 | 5.321274000 | -0.001581000 |
| C | -4.537983000 | 3.673627000 | -1.355360000 |
| H | -5.550931000 | 3.983234000 | -1.594663000 |
| C | -4.013182000 | 2.522691000 | -1.923284000 |
| H | -4.612892000 | 1.904109000 | -2.575785000 |
| C | -2.691588000 | 2.155103000 | -1.618868000 |
| N | 1.804604000  | 3.278859000 | -0.816475000 |
| N | -0.226176000 | 4.426295000 | 0.734164000  |
| N | 0.291085000  | 2.309425000 | 2.372163000  |
| N | -1.960673000 | 2.844746000 | -0.715894000 |
| N | -2.063666000 | 1.028932000 | -2.135704000 |

|   |              |              |              |
|---|--------------|--------------|--------------|
| H | -1.349595000 | 0.652878000  | -1.505018000 |
| H | 1.421236000  | -1.180365000 | 1.497674000  |
| N | 3.032047000  | 1.347422000  | -1.106878000 |
| H | 2.262366000  | 0.954640000  | -0.561267000 |
| N | -2.914295000 | -0.542545000 | 1.403785000  |
| H | -1.985640000 | -0.308829000 | 1.040469000  |
| C | 3.224509000  | -0.868542000 | 2.280331000  |
| O | 3.012736000  | 0.323180000  | 2.095697000  |
| C | 3.900412000  | 0.295571000  | -1.469557000 |
| O | 3.645966000  | -0.780614000 | -0.941130000 |
| C | -2.389555000 | 0.113468000  | -3.153428000 |
| O | -2.101868000 | -1.058840000 | -2.938451000 |
| C | -3.377641000 | 0.441786000  | 2.295240000  |
| O | -2.827957000 | 1.535610000  | 2.223775000  |
| C | 5.025839000  | 0.393646000  | -2.530507000 |
| C | 4.640450000  | 1.274979000  | -3.739048000 |
| C | 6.353436000  | 0.841146000  | -1.864815000 |
| C | 5.262880000  | -1.039410000 | -3.063946000 |
| H | 3.726097000  | 0.899863000  | -4.213313000 |
| H | 4.482485000  | 2.327868000  | -3.504207000 |
| H | 5.439665000  | 1.225517000  | -4.485859000 |
| H | 6.658690000  | 0.115141000  | -1.104555000 |
| H | 7.140910000  | 0.880542000  | -2.624965000 |
| H | 6.315853000  | 1.819463000  | -1.379748000 |
| H | 6.069895000  | -1.016300000 | -3.803754000 |
| H | 5.543613000  | -1.723643000 | -2.261578000 |
| H | 4.366252000  | -1.439026000 | -3.547153000 |
| C | 4.634934000  | -1.365140000 | 2.669892000  |
| C | 4.753327000  | -1.458148000 | 4.212334000  |
| C | 5.024592000  | -2.680261000 | 1.962061000  |
| C | 5.629211000  | -0.274998000 | 2.206715000  |
| H | 4.547041000  | -0.484681000 | 4.669666000  |
| H | 4.081499000  | -2.187461000 | 4.673030000  |
| H | 5.776023000  | -1.745462000 | 4.478360000  |
| H | 4.902618000  | -2.578301000 | 0.878368000  |
| H | 6.079460000  | -2.894503000 | 2.164524000  |
| H | 4.453155000  | -3.550437000 | 2.289277000  |
| H | 6.644867000  | -0.572960000 | 2.487261000  |
| H | 5.592243000  | -0.153719000 | 1.120651000  |



|   |              |              |              |
|---|--------------|--------------|--------------|
| H | 5.407846000  | 0.690641000  | 2.665253000  |
| C | -4.391179000 | 0.154713000  | 3.431979000  |
| C | -5.744955000 | 0.824418000  | 3.092706000  |
| C | -4.569564000 | -1.336840000 | 3.775124000  |
| C | -3.818248000 | 0.862498000  | 4.687161000  |
| H | -5.603246000 | 1.884897000  | 2.861924000  |
| H | -6.257306000 | 0.357802000  | 2.244776000  |
| H | -6.414933000 | 0.749611000  | 3.955700000  |
| H | -3.603860000 | -1.819087000 | 3.965158000  |
| H | -5.164534000 | -1.420741000 | 4.690459000  |
| H | -5.089207000 | -1.907625000 | 3.003565000  |
| H | -4.509178000 | 0.726569000  | 5.525271000  |
| H | -2.849578000 | 0.437913000  | 4.974140000  |
| H | -3.682665000 | 1.930876000  | 4.510827000  |
| C | -2.911493000 | 0.541918000  | -4.548716000 |
| C | -4.389919000 | 0.109892000  | -4.699801000 |
| C | -2.721622000 | 2.034939000  | -4.879795000 |
| C | -2.077463000 | -0.275268000 | -5.570031000 |
| H | -4.506099000 | -0.953568000 | -4.468746000 |
| H | -5.072829000 | 0.674496000  | -4.056184000 |
| H | -4.712385000 | 0.272193000  | -5.733581000 |
| H | -1.682851000 | 2.347513000  | -4.723800000 |
| H | -2.958169000 | 2.195551000  | -5.936665000 |
| H | -3.367026000 | 2.700589000  | -4.303989000 |
| H | -2.423851000 | -0.046893000 | -6.583009000 |
| H | -1.014058000 | -0.016831000 | -5.510580000 |
| H | -2.178697000 | -1.347793000 | -5.395161000 |

**15d<sub>oss</sub>**

|    |             |              |              |
|----|-------------|--------------|--------------|
| Cu | 0.666935000 | -2.155694000 | 0.045328000  |
| C  | 0.839437000 | -1.407785000 | -2.977433000 |
| H  | 0.413176000 | -0.473221000 | -2.632028000 |
| C  | 1.095921000 | -1.653403000 | -4.324544000 |
| H  | 0.860391000 | -0.900386000 | -5.068835000 |
| C  | 1.648949000 | -2.880586000 | -4.689192000 |
| H  | 1.855679000 | -3.107050000 | -5.730803000 |
| C  | 1.927251000 | -3.821659000 | -3.696844000 |
| H  | 2.351528000 | -4.789218000 | -3.946242000 |
| C  | 1.641424000 | -3.499756000 | -2.372221000 |
| C  | 1.914085000 | -4.436313000 | -1.215871000 |

|    |              |              |              |
|----|--------------|--------------|--------------|
| H  | 1.943315000  | -5.482510000 | -1.550465000 |
| H  | 2.892090000  | -4.202037000 | -0.780086000 |
| C  | -0.421547000 | -4.783305000 | -0.575065000 |
| H  | -0.413510000 | -5.882356000 | -0.561520000 |
| H  | -0.596898000 | -4.466405000 | -1.608842000 |
| C  | -1.546612000 | -4.251092000 | 0.282482000  |
| C  | -2.685729000 | -5.018797000 | 0.492476000  |
| H  | -2.750536000 | -6.027691000 | 0.099096000  |
| C  | -3.749971000 | -4.440229000 | 1.186648000  |
| H  | -4.675584000 | -4.988439000 | 1.334437000  |
| C  | -3.621774000 | -3.148058000 | 1.669281000  |
| H  | -4.448582000 | -2.657241000 | 2.163778000  |
| C  | -2.408487000 | -2.460886000 | 1.484442000  |
| C  | 1.327182000  | -4.785479000 | 1.147044000  |
| H  | 1.738715000  | -5.798159000 | 1.034634000  |
| H  | 0.436686000  | -4.869501000 | 1.779285000  |
| C  | 2.328885000  | -3.881380000 | 1.834084000  |
| C  | 3.241104000  | -4.404616000 | 2.739765000  |
| H  | 3.294938000  | -5.473661000 | 2.915911000  |
| C  | 4.053899000  | -3.509407000 | 3.440876000  |
| H  | 4.746485000  | -3.870826000 | 4.195008000  |
| C  | 3.963749000  | -2.152465000 | 3.181242000  |
| H  | 4.556150000  | -1.446811000 | 3.743109000  |
| C  | 3.077236000  | -1.695177000 | 2.187774000  |
| N  | 1.106720000  | -2.312896000 | -2.028378000 |
| N  | 0.892095000  | -4.244197000 | -0.158152000 |
| N  | -1.393095000 | -3.002617000 | 0.772670000  |
| N  | 2.241913000  | -2.561039000 | 1.558568000  |
| N  | 2.907164000  | -0.367869000 | 1.841373000  |
| O  | 0.611052000  | -0.241259000 | 0.128800000  |
| O  | -0.744252000 | 0.178807000  | -0.021994000 |
| Cu | -1.085239000 | 2.046943000  | 0.184196000  |
| C  | 1.604530000  | 3.066131000  | -1.691925000 |
| C  | 2.408924000  | 4.149522000  | -2.099284000 |
| H  | 3.459092000  | 3.999034000  | -2.291151000 |
| C  | 1.851023000  | 5.409912000  | -2.211925000 |
| H  | 2.463185000  | 6.247952000  | -2.531156000 |
| C  | 0.507417000  | 5.599144000  | -1.874161000 |
| H  | 0.040476000  | 6.575977000  | -1.940359000 |

|   |              |              |              |
|---|--------------|--------------|--------------|
| C | -0.201771000 | 4.504145000  | -1.400406000 |
| C | -1.631875000 | 4.657409000  | -0.925770000 |
| H | -1.906967000 | 5.718896000  | -0.866999000 |
| H | -2.315813000 | 4.173429000  | -1.628971000 |
| C | -1.047189000 | 4.699299000  | 1.460203000  |
| H | -1.659359000 | 5.490135000  | 1.913437000  |
| H | -0.186955000 | 5.190692000  | 0.993136000  |
| C | -0.535315000 | 3.736864000  | 2.506927000  |
| C | -0.231726000 | 4.149366000  | 3.803086000  |
| H | -0.420177000 | 5.174380000  | 4.107232000  |
| C | 0.319453000  | 3.226569000  | 4.690767000  |
| H | 0.568975000  | 3.524197000  | 5.704731000  |
| C | 0.537861000  | 1.919604000  | 4.257582000  |
| H | 0.965056000  | 1.171396000  | 4.916506000  |
| C | 0.192257000  | 1.581883000  | 2.953086000  |
| H | 0.321894000  | 0.578889000  | 2.567741000  |
| C | -3.222687000 | 3.805354000  | 0.770518000  |
| H | -3.765540000 | 4.760784000  | 0.748552000  |
| H | -3.236481000 | 3.431206000  | 1.800975000  |
| C | -3.905883000 | 2.784190000  | -0.111803000 |
| C | -5.281112000 | 2.811602000  | -0.298455000 |
| H | -5.881410000 | 3.605934000  | 0.131909000  |
| C | -5.864835000 | 1.765118000  | -1.016633000 |
| H | -6.942439000 | 1.718662000  | -1.141869000 |
| C | -5.062711000 | 0.772856000  | -1.557345000 |
| H | -5.499337000 | -0.069539000 | -2.074146000 |
| C | -3.667165000 | 0.855952000  | -1.405490000 |
| N | 0.323090000  | 3.260457000  | -1.305883000 |
| N | -1.802627000 | 3.997068000  | 0.393322000  |
| N | -0.327484000 | 2.471936000  | 2.096960000  |
| N | -3.111027000 | 1.837156000  | -0.654404000 |
| N | -2.776090000 | -0.072335000 | -1.921374000 |
| H | -1.928210000 | -0.176969000 | -1.344733000 |
| H | 2.016843000  | -0.186068000 | 1.368026000  |
| N | 2.074112000  | 1.761187000  | -1.603346000 |
| H | 1.590469000  | 1.176081000  | -0.910288000 |
| N | -2.200372000 | -1.158394000 | 1.922208000  |
| H | -1.657136000 | -0.594199000 | 1.239820000  |
| C | 3.668576000  | 0.823994000  | 1.833618000  |

|   |              |              |              |
|---|--------------|--------------|--------------|
| O | 3.018563000  | 1.839670000  | 1.625889000  |
| C | 3.267754000  | 1.118852000  | -2.002091000 |
| O | 3.624689000  | 0.181084000  | -1.299520000 |
| C | -2.878708000 | -1.112295000 | -2.864191000 |
| O | -2.179340000 | -2.097023000 | -2.654306000 |
| C | -2.891938000 | -0.342306000 | 2.826536000  |
| O | -2.972637000 | 0.850531000  | 2.539098000  |
| C | 4.033325000  | 1.418789000  | -3.323268000 |
| C | 3.171148000  | 2.058541000  | -4.430283000 |
| C | 5.304622000  | 2.253648000  | -3.024780000 |
| C | 4.526335000  | 0.046372000  | -3.849972000 |
| H | 2.262288000  | 1.472628000  | -4.609549000 |
| H | 2.871418000  | 3.087403000  | -4.226216000 |
| H | 3.743657000  | 2.070552000  | -5.363720000 |
| H | 5.923871000  | 1.751182000  | -2.275289000 |
| H | 5.895430000  | 2.347675000  | -3.942193000 |
| H | 5.104830000  | 3.267455000  | -2.666711000 |
| H | 5.115754000  | 0.203106000  | -4.759233000 |
| H | 5.148044000  | -0.460518000 | -3.110554000 |
| H | 3.687156000  | -0.610410000 | -4.097424000 |
| C | 5.205107000  | 0.897357000  | 1.998521000  |
| C | 5.556644000  | 1.084206000  | 3.496169000  |
| C | 5.952192000  | -0.293731000 | 1.362500000  |
| C | 5.660670000  | 2.179919000  | 1.262655000  |
| H | 5.059866000  | 1.973534000  | 3.898089000  |
| H | 5.281897000  | 0.235706000  | 4.129486000  |
| H | 6.637731000  | 1.226619000  | 3.597458000  |
| H | 5.637400000  | -0.431903000 | 0.323095000  |
| H | 7.026413000  | -0.079983000 | 1.365965000  |
| H | 5.815166000  | -1.238975000 | 1.889999000  |
| H | 6.742995000  | 2.296350000  | 1.381000000  |
| H | 5.437414000  | 2.115271000  | 0.193625000  |
| H | 5.165966000  | 3.067793000  | 1.660395000  |
| C | -3.388498000 | -0.830216000 | 4.212915000  |
| C | -4.936162000 | -0.826299000 | 4.229628000  |
| C | -2.827748000 | -2.191583000 | 4.667272000  |
| C | -2.904989000 | 0.238359000  | 5.227727000  |
| H | -5.323022000 | 0.147502000  | 3.914135000  |
| H | -5.375239000 | -1.593402000 | 3.582587000  |

|   |              |              |              |
|---|--------------|--------------|--------------|
| H | -5.290529000 | -1.021610000 | 5.247288000  |
| H | -1.734575000 | -2.218348000 | 4.591423000  |
| H | -3.088241000 | -2.348063000 | 5.719281000  |
| H | -3.229324000 | -3.039946000 | 4.110235000  |
| H | -3.273454000 | -0.018407000 | 6.226050000  |
| H | -1.810871000 | 0.277078000  | 5.271166000  |
| H | -3.271924000 | 1.230827000  | 4.960255000  |
| C | -3.676793000 | -0.995561000 | -4.189476000 |
| C | -4.942770000 | -1.882754000 | -4.102795000 |
| C | -4.021664000 | 0.445648000  | -4.613222000 |
| C | -2.760561000 | -1.598612000 | -5.284836000 |
| H | -4.676297000 | -2.906922000 | -3.823815000 |
| H | -5.680967000 | -1.516781000 | -3.381623000 |
| H | -5.433670000 | -1.911777000 | -5.081205000 |
| H | -3.131138000 | 1.084742000  | -4.610349000 |
| H | -4.410955000 | 0.430163000  | -5.636585000 |
| H | -4.782675000 | 0.919666000  | -3.991095000 |
| H | -3.293776000 | -1.600328000 | -6.240819000 |
| H | -1.849126000 | -1.002776000 | -5.409215000 |
| H | -2.470750000 | -2.621446000 | -5.038906000 |

${}_3TS_{1d}^{1a}$

|    |             |              |              |
|----|-------------|--------------|--------------|
| Cu | 2.701616000 | 0.018595000  | -0.034958000 |
| C  | 1.965921000 | -2.108177000 | -2.225610000 |
| H  | 0.957636000 | -1.931861000 | -1.862948000 |
| C  | 2.237896000 | -3.059998000 | -3.204990000 |
| H  | 1.431980000 | -3.647894000 | -3.631185000 |
| C  | 3.560257000 | -3.240675000 | -3.609219000 |
| H  | 3.813927000 | -3.979136000 | -4.363680000 |
| C  | 4.558260000 | -2.461504000 | -3.022924000 |
| H  | 5.598175000 | -2.580379000 | -3.311423000 |
| C  | 4.204672000 | -1.519037000 | -2.057893000 |
| C  | 5.234436000 | -0.588568000 | -1.440763000 |
| H  | 6.239457000 | -1.029432000 | -1.508770000 |
| H  | 5.254913000 | 0.340014000  | -2.023805000 |
| C  | 5.177772000 | -1.308368000 | 0.912479000  |
| H  | 6.234539000 | -1.309318000 | 1.216109000  |
| H  | 4.993318000 | -2.261771000 | 0.402905000  |
| C  | 4.275576000 | -1.236855000 | 2.132868000  |

|    |              |              |              |
|----|--------------|--------------|--------------|
| C  | 4.705815000  | -1.669127000 | 3.387381000  |
| H  | 5.724970000  | -2.018128000 | 3.522792000  |
| C  | 3.809856000  | -1.647846000 | 4.456721000  |
| H  | 4.123863000  | -1.980444000 | 5.441408000  |
| C  | 2.511080000  | -1.186638000 | 4.241731000  |
| H  | 1.784580000  | -1.149193000 | 5.046404000  |
| C  | 2.161885000  | -0.760568000 | 2.963260000  |
| H  | 1.167617000  | -0.382850000 | 2.744138000  |
| C  | 5.442434000  | 1.075703000  | 0.359780000  |
| H  | 6.504290000  | 1.169313000  | 0.090321000  |
| H  | 5.386737000  | 1.124417000  | 1.453967000  |
| C  | 4.645390000  | 2.236271000  | -0.210990000 |
| C  | 5.243838000  | 3.457983000  | -0.517960000 |
| H  | 6.316193000  | 3.583311000  | -0.403219000 |
| C  | 4.445655000  | 4.510166000  | -0.968642000 |
| H  | 4.891004000  | 5.469864000  | -1.212545000 |
| C  | 3.072456000  | 4.307420000  | -1.106200000 |
| H  | 2.417078000  | 5.097556000  | -1.456632000 |
| C  | 2.552113000  | 3.055057000  | -0.791150000 |
| N  | 2.924064000  | -1.351883000 | -1.665105000 |
| N  | 4.888032000  | -0.229151000 | -0.052257000 |
| N  | 3.020475000  | -0.785464000 | 1.930596000  |
| N  | 3.317904000  | 2.042428000  | -0.353126000 |
| O  | 0.725426000  | 0.451679000  | 0.093965000  |
| O  | -0.104458000 | -0.413702000 | -0.344442000 |
| Cu | -2.753629000 | 0.001749000  | -0.029332000 |
| C  | -2.488765000 | 0.385718000  | -3.102337000 |
| H  | -1.425932000 | 0.395195000  | -2.878494000 |
| C  | -2.956226000 | 0.624262000  | -4.391606000 |
| H  | -2.257434000 | 0.822994000  | -5.197368000 |
| C  | -4.333264000 | 0.609351000  | -4.611118000 |
| H  | -4.740588000 | 0.799110000  | -5.599535000 |
| C  | -5.182349000 | 0.351554000  | -3.535370000 |
| H  | -6.259651000 | 0.335331000  | -3.670541000 |
| C  | -4.636469000 | 0.108275000  | -2.274016000 |
| C  | -5.528924000 | -0.262299000 | -1.095421000 |
| H  | -6.557169000 | 0.082162000  | -1.286141000 |
| H  | -5.572076000 | -1.357059000 | -1.038554000 |
| C  | -5.194573000 | 1.656128000  | 0.416950000  |

|   |              |              |              |
|---|--------------|--------------|--------------|
| H | -6.170119000 | 1.884234000  | 0.873921000  |
| H | -5.186512000 | 2.149084000  | -0.563256000 |
| C | -4.080323000 | 2.272179000  | 1.254661000  |
| C | -4.339232000 | 3.346768000  | 2.107138000  |
| H | -5.355543000 | 3.710727000  | 2.224288000  |
| C | -3.284556000 | 3.944140000  | 2.796390000  |
| H | -3.467879000 | 4.781502000  | 3.462838000  |
| C | -1.995645000 | 3.443158000  | 2.616325000  |
| H | -1.144680000 | 3.875474000  | 3.132353000  |
| C | -1.818331000 | 2.360289000  | 1.759525000  |
| H | -0.834884000 | 1.931850000  | 1.587970000  |
| C | -5.326921000 | -0.628805000 | 1.335524000  |
| H | -6.394861000 | -0.894187000 | 1.377569000  |
| H | -5.113975000 | -0.047788000 | 2.241648000  |
| C | -4.481937000 | -1.896178000 | 1.382675000  |
| C | -5.000206000 | -3.082840000 | 1.903570000  |
| H | -6.035089000 | -3.123315000 | 2.229873000  |
| C | -4.178241000 | -4.205221000 | 2.000305000  |
| H | -4.564743000 | -5.136427000 | 2.403275000  |
| C | -2.857398000 | -4.110039000 | 1.563476000  |
| H | -2.182611000 | -4.958062000 | 1.614405000  |
| C | -2.417151000 | -2.895697000 | 1.044406000  |
| N | -3.302400000 | 0.132914000  | -2.062643000 |
| N | -5.006129000 | 0.221660000  | 0.185747000  |
| N | -2.831899000 | 1.781638000  | 1.092177000  |
| N | -3.203808000 | -1.809180000 | 0.953394000  |
| H | -1.400270000 | -2.775406000 | 0.682099000  |
| H | 1.491878000  | 2.840063000  | -0.887176000 |

${}_3T_{2d}^{2a}$

|    |             |             |             |
|----|-------------|-------------|-------------|
| Cu | 2.832922000 | 0.124483000 | 0.143866000 |
| C  | 3.160191000 | 0.364604000 | 3.254307000 |
| H  | 2.078297000 | 0.455023000 | 3.228468000 |
| C  | 3.874399000 | 0.477721000 | 4.443672000 |
| H  | 3.353192000 | 0.658871000 | 5.377509000 |
| C  | 5.264097000 | 0.362429000 | 4.398169000 |
| H  | 5.856752000 | 0.453180000 | 5.303336000 |
| C  | 5.886068000 | 0.135486000 | 3.169893000 |
| H  | 6.965852000 | 0.045656000 | 3.101291000 |
| C  | 5.100032000 | 0.021433000 | 2.023712000 |

|    |              |              |              |
|----|--------------|--------------|--------------|
| C  | 5.697226000  | -0.301738000 | 0.666509000  |
| H  | 6.747660000  | 0.017515000  | 0.618308000  |
| H  | 5.687745000  | -1.389674000 | 0.531898000  |
| C  | 5.168019000  | 1.728207000  | -0.617993000 |
| H  | 6.092251000  | 1.895650000  | -1.189060000 |
| H  | 5.322582000  | 2.164435000  | 0.376301000  |
| C  | 3.996999000  | 2.430063000  | -1.279219000 |
| C  | 4.176604000  | 3.550216000  | -2.089148000 |
| H  | 5.177601000  | 3.912107000  | -2.302980000 |
| C  | 3.055141000  | 4.194126000  | -2.613606000 |
| H  | 3.171842000  | 5.069176000  | -3.245768000 |
| C  | 1.788723000  | 3.691591000  | -2.317869000 |
| H  | 0.889386000  | 4.157532000  | -2.705890000 |
| C  | 1.690733000  | 2.559408000  | -1.512728000 |
| H  | 0.729212000  | 2.125819000  | -1.258327000 |
| C  | 5.012207000  | -0.478176000 | -1.694586000 |
| H  | 6.062392000  | -0.657788000 | -1.963460000 |
| H  | 4.577197000  | 0.142176000  | -2.486965000 |
| C  | 4.252886000  | -1.787586000 | -1.621825000 |
| C  | 4.729996000  | -2.922694000 | -2.252835000 |
| H  | 5.681753000  | -2.906796000 | -2.772487000 |
| C  | 3.948223000  | -4.089135000 | -2.203354000 |
| H  | 4.290680000  | -4.998237000 | -2.688294000 |
| C  | 2.746045000  | -4.075540000 | -1.528025000 |
| H  | 2.121823000  | -4.961584000 | -1.470225000 |
| C  | 2.328290000  | -2.881975000 | -0.891736000 |
| N  | 3.757067000  | 0.139530000  | 2.072501000  |
| N  | 4.902282000  | 0.286838000  | -0.432924000 |
| N  | 2.769133000  | 1.941978000  | -1.001659000 |
| N  | 3.075627000  | -1.757434000 | -0.943867000 |
| N  | 1.129978000  | -2.828999000 | -0.237763000 |
| O  | 0.979381000  | 0.005737000  | 0.907171000  |
| O  | 0.031714000  | 0.416297000  | 0.137568000  |
| Cu | -2.887893000 | -0.005066000 | 0.108369000  |
| C  | -2.326841000 | -1.137593000 | 2.948745000  |
| H  | -1.290866000 | -0.932937000 | 2.692646000  |
| C  | -2.663101000 | -1.760933000 | 4.146662000  |
| H  | -1.887800000 | -2.051783000 | 4.847733000  |
| C  | -4.010583000 | -2.004091000 | 4.412542000  |



|   |              |              |              |
|---|--------------|--------------|--------------|
| H | -4.316053000 | -2.495136000 | 5.331482000  |
| C | -4.962061000 | -1.609532000 | 3.473179000  |
| H | -6.019255000 | -1.786328000 | 3.646805000  |
| C | -4.548084000 | -0.976600000 | 2.299472000  |
| C | -5.569598000 | -0.455986000 | 1.293962000  |
| H | -6.519013000 | -0.999772000 | 1.418171000  |
| H | -5.776920000 | 0.592804000  | 1.540251000  |
| C | -5.088768000 | -1.817272000 | -0.707178000 |
| H | -6.058559000 | -2.059807000 | -1.169473000 |
| H | -4.928852000 | -2.554289000 | 0.089969000  |
| C | -3.975313000 | -1.988608000 | -1.734035000 |
| C | -4.160956000 | -2.784036000 | -2.865467000 |
| H | -5.126425000 | -3.246125000 | -3.048072000 |
| C | -3.100276000 | -2.974359000 | -3.750929000 |
| H | -3.228468000 | -3.587191000 | -4.638083000 |
| C | -1.880015000 | -2.357487000 | -3.478609000 |
| H | -1.028166000 | -2.472299000 | -4.140673000 |
| C | -1.773877000 | -1.570877000 | -2.334510000 |
| H | -0.845444000 | -1.068716000 | -2.082197000 |
| C | -5.578389000 | 0.587168000  | -0.945994000 |
| H | -6.674498000 | 0.682022000  | -0.906981000 |
| H | -5.322601000 | 0.319986000  | -1.978859000 |
| C | -4.939151000 | 1.934063000  | -0.637117000 |
| C | -5.671384000 | 3.105330000  | -0.760785000 |
| H | -6.723337000 | 3.069527000  | -1.022742000 |
| C | -5.021355000 | 4.328849000  | -0.544315000 |
| H | -5.567073000 | 5.263028000  | -0.636785000 |
| C | -3.681514000 | 4.338798000  | -0.205515000 |
| H | -3.150717000 | 5.269524000  | -0.031810000 |
| C | -3.005418000 | 3.107261000  | -0.077247000 |
| N | -3.240733000 | -0.751143000 | 2.041180000  |
| N | -5.079369000 | -0.491268000 | -0.085525000 |
| N | -2.793618000 | -1.383757000 | -1.478432000 |
| N | -3.625976000 | 1.930893000  | -0.293130000 |
| N | -1.661923000 | 3.066836000  | 0.231655000  |
| H | -1.309644000 | 2.175058000  | 0.561732000  |
| H | -1.290813000 | 3.868332000  | 0.724877000  |
| H | 0.682363000  | -3.699029000 | 0.010989000  |
| H | 0.938867000  | -2.038795000 | 0.363200000  |

$3TS_{3d}^{3a}$

|    |              |              |              |
|----|--------------|--------------|--------------|
| Cu | -2.747152000 | 0.048742000  | 0.085068000  |
| C  | -1.043358000 | 0.809713000  | -2.418545000 |
| H  | -0.205625000 | 0.700717000  | -1.740065000 |
| C  | -0.850576000 | 1.250608000  | -3.724786000 |
| H  | 0.147686000  | 1.494468000  | -4.072460000 |
| C  | -1.962897000 | 1.377557000  | -4.555389000 |
| H  | -1.857670000 | 1.724250000  | -5.579017000 |
| C  | -3.220222000 | 1.058647000  | -4.044223000 |
| H  | -4.109916000 | 1.151033000  | -4.659736000 |
| C  | -3.332826000 | 0.616386000  | -2.725334000 |
| C  | -4.679132000 | 0.194327000  | -2.156276000 |
| H  | -5.491225000 | 0.664048000  | -2.732894000 |
| H  | -4.782060000 | -0.889259000 | -2.294281000 |
| C  | -4.992408000 | 1.881903000  | -0.390912000 |
| H  | -6.045688000 | 2.183552000  | -0.497644000 |
| H  | -4.417907000 | 2.471409000  | -1.116215000 |
| C  | -4.500078000 | 2.218896000  | 1.006744000  |
| C  | -5.189181000 | 3.121139000  | 1.800651000  |
| H  | -6.113544000 | 3.567414000  | 1.450459000  |
| C  | -4.662426000 | 3.440684000  | 3.062100000  |
| H  | -5.176226000 | 4.147155000  | 3.707119000  |
| C  | -3.491073000 | 2.844208000  | 3.482346000  |
| H  | -3.065943000 | 3.061008000  | 4.457278000  |
| C  | -2.850188000 | 1.919886000  | 2.625256000  |
| C  | -5.661909000 | -0.457835000 | 0.004749000  |
| H  | -6.640912000 | -0.574503000 | -0.484218000 |
| H  | -5.851550000 | -0.018699000 | 0.991570000  |
| C  | -5.023877000 | -1.821965000 | 0.209802000  |
| C  | -5.795863000 | -2.974596000 | 0.170229000  |
| H  | -6.853284000 | -2.916892000 | -0.064517000 |
| C  | -5.184318000 | -4.203295000 | 0.450329000  |
| H  | -5.763448000 | -5.121586000 | 0.433343000  |
| C  | -3.834980000 | -4.237309000 | 0.752920000  |
| H  | -3.331728000 | -5.172150000 | 0.979148000  |
| C  | -3.114096000 | -3.027344000 | 0.762334000  |
| N  | -2.252365000 | 0.498121000  | -1.920899000 |
| N  | -4.783428000 | 0.466069000  | -0.721073000 |
| N  | -3.346164000 | 1.623207000  | 1.405575000  |

|    |              |              |              |
|----|--------------|--------------|--------------|
| N  | -3.695279000 | -1.845182000 | 0.487270000  |
| N  | -1.748001000 | -3.017433000 | 1.007500000  |
| O  | -0.060883000 | -0.274260000 | 0.980684000  |
| O  | 0.884131000  | 0.599263000  | 0.721942000  |
| Cu | 2.720511000  | 0.042774000  | 0.199485000  |
| C  | 1.688562000  | -2.280088000 | -1.793146000 |
| C  | 1.899562000  | -3.222592000 | -2.832219000 |
| H  | 1.087338000  | -3.878673000 | -3.128206000 |
| C  | 3.135031000  | -3.294450000 | -3.435812000 |
| H  | 3.315051000  | -4.017297000 | -4.225787000 |
| C  | 4.166809000  | -2.437681000 | -3.011608000 |
| H  | 5.155340000  | -2.486140000 | -3.454776000 |
| C  | 3.887816000  | -1.526059000 | -2.011435000 |
| C  | 4.937237000  | -0.546165000 | -1.534238000 |
| H  | 5.945626000  | -0.914539000 | -1.766530000 |
| H  | 4.812309000  | 0.410200000  | -2.054182000 |
| C  | 5.193552000  | -1.427743000 | 0.754116000  |
| H  | 6.282851000  | -1.447027000 | 0.895076000  |
| H  | 4.922736000  | -2.342857000 | 0.215581000  |
| C  | 4.476464000  | -1.418011000 | 2.089498000  |
| C  | 5.043835000  | -1.967940000 | 3.238693000  |
| H  | 6.050127000  | -2.374362000 | 3.209217000  |
| C  | 4.298491000  | -1.987187000 | 4.417774000  |
| H  | 4.719463000  | -2.409657000 | 5.325029000  |
| C  | 3.010538000  | -1.450517000 | 4.413920000  |
| H  | 2.400062000  | -1.443000000 | 5.310547000  |
| C  | 2.520065000  | -0.909627000 | 3.228888000  |
| H  | 1.527226000  | -0.475502000 | 3.172374000  |
| C  | 5.456570000  | 0.975872000  | 0.331914000  |
| H  | 6.506164000  | 0.987288000  | 0.007580000  |
| H  | 5.454914000  | 0.996876000  | 1.428286000  |
| C  | 4.724247000  | 2.190663000  | -0.191674000 |
| C  | 5.412465000  | 3.330619000  | -0.563858000 |
| H  | 6.495963000  | 3.357617000  | -0.527784000 |
| C  | 4.670108000  | 4.447917000  | -0.981007000 |
| H  | 5.175309000  | 5.363163000  | -1.274060000 |
| C  | 3.294181000  | 4.374009000  | -1.015617000 |
| H  | 2.692838000  | 5.220624000  | -1.331303000 |
| C  | 2.654692000  | 3.170316000  | -0.633292000 |

|   |              |              |              |
|---|--------------|--------------|--------------|
| N | 2.671362000  | -1.429547000 | -1.408806000 |
| N | 4.788387000  | -0.277229000 | -0.084717000 |
| N | 3.234306000  | -0.893112000 | 2.091737000  |
| N | 3.368643000  | 2.092616000  | -0.230600000 |
| N | 1.294736000  | 3.055462000  | -0.704024000 |
| H | 0.855282000  | 2.338607000  | -0.136602000 |
| H | 0.767205000  | 3.911127000  | -0.808323000 |
| H | -1.403456000 | -3.821676000 | 1.519064000  |
| H | -1.398606000 | -2.143636000 | 1.385838000  |
| N | 0.486594000  | -2.193532000 | -1.173020000 |
| H | 0.372529000  | -1.634718000 | -0.333953000 |
| H | -0.198574000 | -2.924573000 | -1.295765000 |
| N | -1.718424000 | 1.260203000  | 3.021620000  |
| H | -1.161440000 | 0.802900000  | 2.306995000  |
| H | -1.218095000 | 1.624140000  | 3.819481000  |

${}_3T_{4d}^{4a}$

|    |             |              |              |
|----|-------------|--------------|--------------|
| Cu | 2.976525000 | 0.858451000  | 0.165459000  |
| C  | 3.534185000 | 0.439314000  | 3.216649000  |
| H  | 2.454160000 | 0.337811000  | 3.271754000  |
| C  | 4.313725000 | 0.445558000  | 4.370187000  |
| H  | 3.847211000 | 0.345453000  | 5.344524000  |
| C  | 5.693568000 | 0.594619000  | 4.236860000  |
| H  | 6.337527000 | 0.614936000  | 5.110829000  |
| C  | 6.234144000 | 0.726127000  | 2.958053000  |
| H  | 7.303844000 | 0.849632000  | 2.817949000  |
| C  | 5.387054000 | 0.697542000  | 1.849105000  |
| C  | 5.951191000 | 0.763466000  | 0.434362000  |
| H  | 6.961343000 | 1.200955000  | 0.458970000  |
| H  | 6.065868000 | -0.264086000 | 0.067911000  |
| C  | 5.069074000 | 2.925503000  | -0.356100000 |
| H  | 5.842805000 | 3.396940000  | -0.981978000 |
| H  | 5.331272000 | 3.153374000  | 0.684488000  |
| C  | 3.715421000 | 3.564201000  | -0.643131000 |
| C  | 3.638098000 | 4.873694000  | -1.117099000 |
| H  | 4.547948000 | 5.415301000  | -1.358955000 |
| C  | 2.388025000 | 5.476275000  | -1.261807000 |
| H  | 2.311178000 | 6.497591000  | -1.622977000 |
| C  | 1.247324000 | 4.746045000  | -0.933886000 |
| H  | 0.247906000 | 5.157752000  | -1.011724000 |

|    |              |              |              |
|----|--------------|--------------|--------------|
| C  | 1.403627000  | 3.435540000  | -0.489152000 |
| H  | 0.538739000  | 2.835984000  | -0.232115000 |
| C  | 5.101300000  | 0.988039000  | -1.873032000 |
| H  | 6.124228000  | 0.957451000  | -2.281582000 |
| H  | 4.541780000  | 1.708834000  | -2.482858000 |
| C  | 4.452352000  | -0.378940000 | -2.048368000 |
| C  | 4.923078000  | -1.258427000 | -3.020130000 |
| H  | 5.791628000  | -0.998438000 | -3.616064000 |
| C  | 4.238788000  | -2.456197000 | -3.229898000 |
| H  | 4.555070000  | -3.142521000 | -4.009518000 |
| C  | 3.137070000  | -2.758141000 | -2.440286000 |
| H  | 2.562275000  | -3.659668000 | -2.606583000 |
| C  | 2.768563000  | -1.860905000 | -1.428395000 |
| N  | 4.049599000  | 0.559854000  | 1.981244000  |
| N  | 5.059049000  | 1.465972000  | -0.491759000 |
| N  | 2.606990000  | 2.850062000  | -0.347393000 |
| N  | 3.390777000  | -0.676460000 | -1.264195000 |
| N  | 1.672062000  | -2.074691000 | -0.582835000 |
| O  | 0.349521000  | 0.348146000  | 0.523840000  |
| O  | -0.759716000 | 0.494967000  | -0.143449000 |
| Cu | -2.011830000 | -1.051918000 | -0.074678000 |
| C  | -1.734936000 | -0.421544000 | 2.936489000  |
| H  | -1.132784000 | 0.411331000  | 2.589596000  |
| C  | -2.040339000 | -0.590257000 | 4.284174000  |
| H  | -1.677324000 | 0.122550000  | 5.016772000  |
| C  | -2.825908000 | -1.680585000 | 4.658420000  |
| H  | -3.092115000 | -1.840037000 | 5.698947000  |
| C  | -3.272079000 | -2.563495000 | 3.674868000  |
| H  | -3.885108000 | -3.421522000 | 3.932971000  |
| C  | -2.917773000 | -2.332792000 | 2.346417000  |
| C  | -3.277516000 | -3.303841000 | 1.237913000  |
| H  | -2.435228000 | -3.993693000 | 1.126982000  |
| H  | -4.161765000 | -3.894353000 | 1.512446000  |
| C  | -3.087070000 | -3.457350000 | -1.231862000 |
| H  | -3.890704000 | -4.150058000 | -1.515539000 |
| H  | -2.214734000 | -4.049989000 | -0.942076000 |
| C  | -2.693030000 | -2.581809000 | -2.407508000 |
| C  | -2.932973000 | -2.944758000 | -3.731541000 |
| H  | -3.463670000 | -3.864907000 | -3.955680000 |

|   |              |              |              |
|---|--------------|--------------|--------------|
| C | -2.485646000 | -2.108037000 | -4.755830000 |
| H | -2.665365000 | -2.370729000 | -5.793930000 |
| C | -1.817915000 | -0.928077000 | -4.427600000 |
| H | -1.462697000 | -0.247620000 | -5.193928000 |
| C | -1.624010000 | -0.626154000 | -3.082202000 |
| H | -1.123330000 | 0.283456000  | -2.764809000 |
| C | -4.829910000 | -2.049197000 | -0.235400000 |
| H | -5.579779000 | -2.748290000 | 0.157241000  |
| H | -5.006441000 | -1.962002000 | -1.312878000 |
| C | -5.031287000 | -0.669239000 | 0.364207000  |
| C | -6.185590000 | -0.355353000 | 1.072489000  |
| H | -6.934787000 | -1.111524000 | 1.282588000  |
| C | -6.346530000 | 0.963694000  | 1.510422000  |
| H | -7.217182000 | 1.245241000  | 2.095070000  |
| C | -5.379286000 | 1.911841000  | 1.212495000  |
| H | -5.468962000 | 2.925009000  | 1.577257000  |
| C | -4.259144000 | 1.521106000  | 0.456594000  |
| N | -2.162893000 | -1.273375000 | 1.991168000  |
| N | -3.464591000 | -2.621508000 | -0.064190000 |
| N | -2.048287000 | -1.436057000 | -2.099977000 |
| N | -4.084988000 | 0.242392000  | 0.072534000  |
| N | -3.200834000 | 2.367216000  | 0.115695000  |
| H | -2.312575000 | 1.876551000  | 0.028139000  |
| H | 1.171015000  | -1.221893000 | -0.325279000 |
| C | -2.994487000 | 3.723534000  | -0.193447000 |
| O | -1.818231000 | 4.062760000  | -0.253459000 |
| C | -4.120791000 | 4.728453000  | -0.528024000 |
| C | -3.499775000 | 5.786850000  | -1.470663000 |
| H | -4.258554000 | 6.536529000  | -1.716952000 |
| H | -2.651972000 | 6.290212000  | -1.002599000 |
| H | -3.153609000 | 5.333330000  | -2.405475000 |
| C | -4.556183000 | 5.458217000  | 0.767384000  |
| H | -5.278612000 | 6.241372000  | 0.514425000  |
| H | -5.031354000 | 4.802556000  | 1.503066000  |
| H | -3.695819000 | 5.934143000  | 1.248953000  |
| C | -5.320961000 | 4.094011000  | -1.260683000 |
| H | -5.912336000 | 3.416955000  | -0.642358000 |
| H | -5.992597000 | 4.891372000  | -1.595119000 |
| H | -4.994027000 | 3.545431000  | -2.151628000 |

|   |              |              |              |
|---|--------------|--------------|--------------|
| C | 0.995451000  | -3.206007000 | -0.144954000 |
| O | -0.206254000 | -3.066093000 | 0.111906000  |
| C | 1.689260000  | -4.554421000 | 0.171838000  |
| C | 1.123469000  | -5.003387000 | 1.545132000  |
| H | 0.036652000  | -5.101771000 | 1.516735000  |
| H | 1.554569000  | -5.973691000 | 1.810174000  |
| H | 1.384339000  | -4.290245000 | 2.335069000  |
| C | 3.223135000  | -4.481628000 | 0.305395000  |
| H | 3.583078000  | -5.422382000 | 0.734165000  |
| H | 3.738875000  | -4.346908000 | -0.646358000 |
| H | 3.527960000  | -3.674247000 | 0.980582000  |
| C | 1.273124000  | -5.603865000 | -0.886165000 |
| H | 1.665223000  | -5.380485000 | -1.883981000 |
| H | 1.659868000  | -6.586624000 | -0.597355000 |
| H | 0.182869000  | -5.677234000 | -0.956433000 |

${}_3TS_{5d}^{5a}$

|    |             |              |             |
|----|-------------|--------------|-------------|
| Cu | 2.891342000 | -0.204948000 | 0.703268000 |
| C  | 1.750046000 | -1.886763000 | 3.086855000 |
| H  | 0.814020000 | -1.394565000 | 2.848535000 |
| C  | 1.838988000 | -2.783091000 | 4.150800000 |
| H  | 0.954511000 | -3.001353000 | 4.738303000 |
| C  | 3.070587000 | -3.367932000 | 4.436621000 |
| H  | 3.174734000 | -4.068076000 | 5.260055000 |
| C  | 4.179929000 | -3.030197000 | 3.657701000 |
| H  | 5.157030000 | -3.457292000 | 3.862129000 |
| C  | 4.014802000 | -2.128124000 | 2.610582000 |
| C  | 5.156512000 | -1.729712000 | 1.695563000 |
| H  | 6.122483000 | -1.822397000 | 2.211696000 |
| H  | 5.183217000 | -2.406044000 | 0.834308000 |
| C  | 5.206418000 | 0.662951000  | 2.214858000 |
| H  | 6.284139000 | 0.824842000  | 2.361775000 |
| H  | 4.810753000 | 0.273046000  | 3.159618000 |
| C  | 4.523016000 | 1.979747000  | 1.905839000 |
| C  | 5.037831000 | 3.158671000  | 2.431849000 |
| H  | 5.952902000 | 3.144603000  | 3.014523000 |
| C  | 4.330372000 | 4.343383000  | 2.222106000 |
| H  | 4.670933000 | 5.275665000  | 2.662222000 |
| C  | 3.177062000 | 4.314321000  | 1.454655000 |
| H  | 2.584072000 | 5.206417000  | 1.306367000 |

|    |              |              |              |
|----|--------------|--------------|--------------|
| C  | 2.761151000  | 3.101750000  | 0.880153000  |
| C  | 5.687527000  | -0.093008000 | -0.073862000 |
| H  | 6.748469000  | -0.367153000 | 0.017394000  |
| H  | 5.649874000  | 0.987331000  | -0.254173000 |
| C  | 5.065126000  | -0.815424000 | -1.254259000 |
| C  | 5.841528000  | -1.155035000 | -2.354229000 |
| H  | 6.906694000  | -0.949919000 | -2.362501000 |
| C  | 5.204662000  | -1.734924000 | -3.454906000 |
| H  | 5.765451000  | -1.967484000 | -4.355120000 |
| C  | 3.849053000  | -2.012822000 | -3.394663000 |
| H  | 3.333753000  | -2.438575000 | -4.243209000 |
| C  | 3.142281000  | -1.724708000 | -2.212644000 |
| N  | 2.816538000  | -1.571664000 | 2.333392000  |
| N  | 4.956186000  | -0.355875000 | 1.179807000  |
| N  | 3.403649000  | 1.937743000  | 1.145198000  |
| N  | 3.739209000  | -1.073595000 | -1.183673000 |
| N  | 1.799890000  | -2.009806000 | -2.034015000 |
| O  | 0.942669000  | -0.419713000 | 0.292719000  |
| O  | 0.101842000  | 0.559780000  | 0.341721000  |
| Cu | -2.380549000 | 0.653801000  | -0.837853000 |
| C  | -3.594104000 | -2.257907000 | -0.831385000 |
| C  | -4.564904000 | -3.218041000 | -1.145606000 |
| H  | -4.316121000 | -4.271205000 | -1.100114000 |
| C  | -5.825669000 | -2.790749000 | -1.544566000 |
| H  | -6.594652000 | -3.514819000 | -1.796400000 |
| C  | -6.080111000 | -1.421934000 | -1.652005000 |
| H  | -7.050624000 | -1.057440000 | -1.973258000 |
| C  | -5.056607000 | -0.524743000 | -1.357214000 |
| C  | -5.285529000 | 0.980337000  | -1.426477000 |
| H  | -6.172995000 | 1.192882000  | -2.042682000 |
| H  | -5.509175000 | 1.338854000  | -0.415161000 |
| C  | -3.834224000 | 1.534218000  | -3.325338000 |
| H  | -4.341434000 | 2.304071000  | -3.928569000 |
| H  | -4.257124000 | 0.570769000  | -3.636003000 |
| C  | -2.350747000 | 1.516271000  | -3.662022000 |
| C  | -1.919564000 | 1.885186000  | -4.938350000 |
| H  | -2.639298000 | 2.248992000  | -5.665626000 |
| C  | -0.570511000 | 1.772408000  | -5.264000000 |
| H  | -0.217812000 | 2.046179000  | -6.253863000 |



|   |              |              |              |
|---|--------------|--------------|--------------|
| C | 0.313419000  | 1.307733000  | -4.290484000 |
| H | 1.374317000  | 1.202910000  | -4.493738000 |
| C | -0.191566000 | 0.981884000  | -3.035835000 |
| H | 0.462285000  | 0.632442000  | -2.247247000 |
| C | -3.944592000 | 3.064906000  | -1.411217000 |
| H | -4.817780000 | 3.692660000  | -1.652617000 |
| H | -3.080596000 | 3.501194000  | -1.927900000 |
| C | -3.673512000 | 3.133503000  | 0.082614000  |
| C | -4.110815000 | 4.229071000  | 0.822370000  |
| H | -4.686230000 | 5.015627000  | 0.345494000  |
| C | -3.767229000 | 4.302637000  | 2.171726000  |
| H | -4.050155000 | 5.165279000  | 2.767425000  |
| C | -3.052723000 | 3.261767000  | 2.749940000  |
| H | -2.746490000 | 3.305590000  | 3.785297000  |
| C | -2.719742000 | 2.151688000  | 1.962927000  |
| N | -3.836430000 | -0.939794000 | -0.951674000 |
| N | -4.092770000 | 1.690492000  | -1.895457000 |
| N | -1.493303000 | 1.074546000  | -2.719115000 |
| N | -2.982061000 | 2.116240000  | 0.639695000  |
| N | -2.024269000 | 1.037759000  | 2.450177000  |
| H | -1.377577000 | 0.641735000  | 1.770732000  |
| H | 1.343170000  | -1.447437000 | -1.318788000 |
| N | -2.276322000 | -2.596879000 | -0.467495000 |
| H | -1.566865000 | -2.267438000 | -1.126348000 |
| N | 1.636475000  | 3.010125000  | 0.068103000  |
| H | 1.047507000  | 2.192842000  | 0.251728000  |
| C | 0.824645000  | -2.765922000 | -2.724019000 |
| O | -0.313065000 | -2.313451000 | -2.672581000 |
| C | -1.727439000 | -3.513442000 | 0.426749000  |
| O | -0.539268000 | -3.787407000 | 0.277778000  |
| C | -1.953536000 | 0.310993000  | 3.643003000  |
| O | -1.022542000 | -0.488608000 | 3.716522000  |
| C | 0.923730000  | 3.961340000  | -0.693274000 |
| O | -0.282658000 | 3.783766000  | -0.787288000 |
| C | -2.517298000 | -4.126586000 | 1.611433000  |
| C | -3.790973000 | -3.368078000 | 2.032513000  |
| C | -2.851464000 | -5.593237000 | 1.245993000  |
| C | -1.548565000 | -4.131694000 | 2.818328000  |
| H | -3.603570000 | -2.293202000 | 2.138542000  |

|   |              |              |              |
|---|--------------|--------------|--------------|
| H | -4.627511000 | -3.504265000 | 1.344922000  |
| H | -4.118332000 | -3.744202000 | 3.008084000  |
| H | -1.942337000 | -6.142574000 | 0.983261000  |
| H | -3.317496000 | -6.089889000 | 2.104066000  |
| H | -3.550176000 | -5.666728000 | 0.405106000  |
| H | -2.009624000 | -4.674867000 | 3.650572000  |
| H | -0.605390000 | -4.615186000 | 2.558034000  |
| H | -1.339674000 | -3.109195000 | 3.153052000  |
| C | 1.095145000  | -4.140724000 | -3.375054000 |
| C | 1.149371000  | -3.984491000 | -4.914881000 |
| C | 2.340933000  | -4.862249000 | -2.824717000 |
| C | -0.141474000 | -5.012675000 | -3.032633000 |
| H | 0.253863000  | -3.473994000 | -5.283069000 |
| H | 2.025355000  | -3.431468000 | -5.270337000 |
| H | 1.187876000  | -4.977230000 | -5.375128000 |
| H | 2.300097000  | -4.933831000 | -1.732488000 |
| H | 2.361060000  | -5.882308000 | -3.221901000 |
| H | 3.286321000  | -4.393476000 | -3.105254000 |
| H | -0.010693000 | -6.004208000 | -3.477880000 |
| H | -0.250243000 | -5.124590000 | -1.949913000 |
| H | -1.057593000 | -4.569572000 | -3.428411000 |
| C | 1.613226000  | 5.080861000  | -1.517595000 |
| C | 1.291276000  | 6.452385000  | -0.876696000 |
| C | 3.129421000  | 4.905702000  | -1.728699000 |
| C | 0.934929000  | 5.043597000  | -2.911660000 |
| H | 0.212628000  | 6.567276000  | -0.733511000 |
| H | 1.781558000  | 6.600781000  | 0.091347000  |
| H | 1.635903000  | 7.253636000  | -1.538872000 |
| H | 3.369000000  | 3.903182000  | -2.102382000 |
| H | 3.466573000  | 5.625369000  | -2.481897000 |
| H | 3.721052000  | 5.087118000  | -0.829404000 |
| H | 1.342566000  | 5.847518000  | -3.533042000 |
| H | 1.122385000  | 4.091597000  | -3.420262000 |
| H | -0.144776000 | 5.177271000  | -2.826217000 |
| C | -2.988988000 | 0.399808000  | 4.790851000  |
| C | -2.486991000 | 1.411898000  | 5.851208000  |
| C | -4.421936000 | 0.729084000  | 4.323960000  |
| C | -3.020795000 | -0.993979000 | 5.463171000  |
| H | -1.482287000 | 1.143915000  | 6.193880000  |

|   |              |              |             |
|---|--------------|--------------|-------------|
| H | -2.457297000 | 2.444441000  | 5.491494000 |
| H | -3.157285000 | 1.388870000  | 6.716977000 |
| H | -4.744792000 | 0.049048000  | 3.526822000 |
| H | -5.107471000 | 0.593622000  | 5.166845000 |
| H | -4.546780000 | 1.753293000  | 3.970141000 |
| H | -3.715824000 | -0.967688000 | 6.308554000 |
| H | -3.362997000 | -1.764970000 | 4.765479000 |
| H | -2.034119000 | -1.282371000 | 5.829453000 |

**AI**

|   |              |              |              |
|---|--------------|--------------|--------------|
| C | -1.133646000 | -0.309382000 | 0.000019000  |
| C | -1.361808000 | 1.075129000  | 0.000066000  |
| C | -0.304977000 | 1.982242000  | 0.000004000  |
| C | 1.008135000  | 1.514335000  | -0.000054000 |
| C | 1.300668000  | 0.148584000  | -0.000027000 |
| C | 0.205841000  | -0.753052000 | -0.000031000 |
| H | -2.377797000 | 1.441639000  | 0.000117000  |
| H | 1.794149000  | 2.258066000  | -0.000077000 |
| O | 0.393830000  | -2.123927000 | -0.000023000 |
| C | -2.322450000 | -1.300500000 | 0.000008000  |
| C | -2.281499000 | -2.186486000 | -1.269891000 |
| C | -2.281462000 | -2.186603000 | 1.269822000  |
| C | -3.683916000 | -0.573615000 | 0.000060000  |
| H | -2.355126000 | -1.568648000 | -2.172928000 |
| H | -1.361701000 | -2.769894000 | -1.326584000 |
| H | -3.131293000 | -2.880757000 | -1.268055000 |
| H | -2.354995000 | -1.568848000 | 2.172921000  |
| H | -3.131285000 | -2.880838000 | 1.267972000  |
| H | -1.361692000 | -2.770066000 | 1.326413000  |
| H | -4.487164000 | -1.318949000 | 0.000015000  |
| H | -3.819626000 | 0.052825000  | 0.889330000  |
| H | -3.819619000 | 0.052943000  | -0.889126000 |
| C | 2.774526000  | -0.332164000 | 0.000027000  |
| C | 3.085355000  | -1.152881000 | 1.281958000  |
| C | 3.085570000  | -1.152692000 | -1.281994000 |
| C | 3.767723000  | 0.849090000  | 0.000168000  |
| H | 2.952301000  | -0.525384000 | 2.169796000  |
| H | 2.447370000  | -2.031399000 | 1.424926000  |
| H | 4.124479000  | -1.502609000 | 1.264822000  |
| H | 2.952876000  | -0.524996000 | -2.169743000 |

|   |              |              |              |
|---|--------------|--------------|--------------|
| H | 4.124618000  | -1.502630000 | -1.264637000 |
| H | 2.447485000  | -2.031082000 | -1.425382000 |
| H | 4.792145000  | 0.460192000  | 0.000149000  |
| H | 3.652543000  | 1.479341000  | -0.887692000 |
| H | 3.652505000  | 1.479140000  | 0.888168000  |
| O | -0.445803000 | 3.348458000  | -0.000027000 |
| C | -1.755768000 | 3.883933000  | -0.000015000 |
| H | -2.319719000 | 3.583388000  | 0.894071000  |
| H | -1.637325000 | 4.969597000  | -0.000103000 |
| H | -2.319806000 | 3.583257000  | -0.894000000 |
| H | 1.338711000  | -2.316170000 | -0.000701000 |

### A2

|   |              |              |              |
|---|--------------|--------------|--------------|
| C | -0.408104000 | 1.016795000  | 0.000237000  |
| C | -0.929223000 | -0.282265000 | 0.000141000  |
| C | -0.050185000 | -1.372241000 | -0.000029000 |
| C | 1.325759000  | -1.168421000 | -0.000258000 |
| C | 1.847038000  | 0.131055000  | -0.000083000 |
| C | 0.973943000  | 1.218268000  | 0.000158000  |
| H | -1.062958000 | 1.880664000  | 0.000538000  |
| H | -0.464564000 | -2.375532000 | -0.000187000 |
| H | 1.997387000  | -2.025464000 | -0.000683000 |
| H | 1.385004000  | 2.222943000  | 0.000372000  |
| O | 3.195014000  | 0.392576000  | -0.000334000 |
| H | 3.675324000  | -0.449378000 | 0.001965000  |
| O | -2.264788000 | -0.592212000 | 0.000740000  |
| C | -3.194053000 | 0.476279000  | -0.000571000 |
| H | -4.183625000 | 0.014777000  | -0.001603000 |
| H | -3.090807000 | 1.106378000  | 0.893806000  |
| H | -3.088622000 | 1.105889000  | -0.895024000 |

### A3

|   |              |              |              |
|---|--------------|--------------|--------------|
| C | -0.264007000 | -1.199595000 | -0.000018000 |
| C | 1.131786000  | -1.219279000 | -0.000031000 |
| C | 1.857370000  | -0.027885000 | 0.000044000  |
| C | 1.171539000  | 1.190467000  | 0.000025000  |
| C | -0.220784000 | 1.224212000  | -0.000067000 |
| C | -0.940944000 | 0.024414000  | -0.000025000 |
| H | -0.826644000 | -2.131920000 | -0.000037000 |
| H | 1.649839000  | -2.174735000 | -0.000035000 |

|   |              |              |              |
|---|--------------|--------------|--------------|
| H | 2.943167000  | -0.046880000 | 0.000084000  |
| H | 1.725672000  | 2.125510000  | 0.000060000  |
| H | -0.766192000 | 2.162767000  | -0.000109000 |
| O | -2.307115000 | 0.111885000  | 0.000040000  |
| H | -2.678683000 | -0.783828000 | 0.000144000  |

**A1'**

|   |              |              |              |
|---|--------------|--------------|--------------|
| C | -1.160780000 | -0.302409000 | 0.000142000  |
| C | -1.366844000 | 1.066311000  | 0.000128000  |
| C | -0.280887000 | 1.960588000  | 0.000094000  |
| C | 1.051830000  | 1.490362000  | 0.000085000  |
| C | 1.342064000  | 0.146720000  | 0.000069000  |
| C | 0.221503000  | -0.815159000 | 0.000182000  |
| H | -2.373660000 | 1.460452000  | 0.000145000  |
| H | 1.829326000  | 2.244958000  | 0.000095000  |
| O | 0.442428000  | -2.053957000 | 0.000088000  |
| C | -2.338088000 | -1.291207000 | 0.000001000  |
| C | -2.276227000 | -2.181264000 | -1.267669000 |
| C | -2.276391000 | -2.181931000 | 1.267176000  |
| C | -3.701886000 | -0.571433000 | 0.000172000  |
| H | -2.344033000 | -1.570598000 | -2.176316000 |
| H | -1.348818000 | -2.753793000 | -1.298971000 |
| H | -3.122010000 | -2.879850000 | -1.269254000 |
| H | -2.344352000 | -1.571746000 | 2.176150000  |
| H | -3.122216000 | -2.880440000 | 1.268223000  |
| H | -1.348977000 | -2.754450000 | 1.298424000  |
| H | -4.502490000 | -1.319163000 | 0.000300000  |
| H | -3.840421000 | 0.054476000  | 0.889945000  |
| H | -3.840707000 | 0.054477000  | -0.889568000 |
| C | 2.789545000  | -0.369319000 | -0.000024000 |
| C | 3.043496000  | -1.224402000 | 1.267451000  |
| C | 3.043284000  | -1.224529000 | -1.267464000 |
| C | 3.810680000  | 0.785288000  | -0.000169000 |
| H | 2.894350000  | -0.627823000 | 2.175777000  |
| H | 2.376231000  | -2.086487000 | 1.301883000  |
| H | 4.080363000  | -1.582809000 | 1.268938000  |
| H | 2.893662000  | -0.628125000 | -2.175826000 |
| H | 4.080243000  | -1.582659000 | -1.269264000 |
| H | 2.376208000  | -2.086776000 | -1.301531000 |

|   |              |             |              |
|---|--------------|-------------|--------------|
| H | 4.824123000  | 0.369283000 | -0.000285000 |
| H | 3.716078000  | 1.419933000 | -0.889089000 |
| H | 3.716325000  | 1.419957000 | 0.888768000  |
| O | -0.404978000 | 3.309013000 | 0.000222000  |
| C | -1.704223000 | 3.891786000 | -0.000187000 |
| H | -2.269358000 | 3.607286000 | 0.895464000  |
| H | -1.542702000 | 4.970670000 | -0.000765000 |
| H | -2.269222000 | 3.606364000 | -0.895631000 |

**A2'**

|   |              |              |              |
|---|--------------|--------------|--------------|
| C | 0.352070000  | -1.042652000 | 0.000136000  |
| C | 0.862601000  | 0.275381000  | 0.000055000  |
| C | -0.020515000 | 1.387171000  | 0.000044000  |
| C | -1.376450000 | 1.194408000  | 0.000000000  |
| C | -1.952907000 | -0.141235000 | -0.000027000 |
| C | -1.011372000 | -1.245908000 | 0.000106000  |
| H | 1.025319000  | -1.892915000 | 0.000237000  |
| H | 0.417791000  | 2.380841000  | 0.000079000  |
| H | -2.067856000 | 2.031438000  | -0.000013000 |
| H | -1.428871000 | -2.248149000 | 0.000139000  |
| O | -3.194483000 | -0.330295000 | -0.000152000 |
| O | 2.177464000  | 0.588222000  | 0.000106000  |
| C | 3.142478000  | -0.460199000 | -0.000194000 |
| H | 4.114569000  | 0.034411000  | -0.000488000 |
| H | 3.050166000  | -1.085411000 | 0.895837000  |
| H | 3.049606000  | -1.085420000 | -0.896143000 |

**A3'**

|   |              |              |              |
|---|--------------|--------------|--------------|
| C | -0.290153000 | -1.239653000 | -0.000054000 |
| C | 1.088009000  | -1.225740000 | 0.000027000  |
| C | 1.785416000  | 0.000001000  | 0.000019000  |
| C | 1.088013000  | 1.225736000  | -0.000008000 |
| C | -0.290151000 | 1.239656000  | -0.000029000 |
| C | -1.048087000 | -0.000002000 | 0.000149000  |
| H | -0.858167000 | -2.165050000 | -0.000184000 |
| H | 1.646010000  | -2.158266000 | -0.000061000 |
| H | 2.871853000  | 0.000002000  | 0.000000000  |
| H | 1.646013000  | 2.158264000  | -0.000066000 |
| H | -0.858175000 | 2.165047000  | -0.000146000 |
| O | -2.305727000 | 0.000002000  | -0.000021000 |

**<sup>3</sup>6a**

|    |              |              |              |
|----|--------------|--------------|--------------|
| Cu | 1.087730000  | -0.026309000 | -0.457559000 |
| C  | 0.893803000  | 3.002854000  | -1.281604000 |
| H  | 0.622912000  | 2.585080000  | -2.246751000 |
| C  | 1.035763000  | 4.375736000  | -1.095518000 |
| H  | 0.874983000  | 5.056515000  | -1.924549000 |
| C  | 1.394176000  | 4.840749000  | 0.169464000  |
| H  | 1.523160000  | 5.903301000  | 0.352309000  |
| C  | 1.590906000  | 3.920494000  | 1.199823000  |
| H  | 1.872344000  | 4.250361000  | 2.195287000  |
| C  | 1.416177000  | 2.561860000  | 0.937202000  |
| C  | 1.530607000  | 1.511364000  | 2.029394000  |
| H  | 2.159457000  | 1.880019000  | 2.853141000  |
| H  | 0.531188000  | 1.336133000  | 2.444846000  |
| C  | 3.471595000  | 0.207965000  | 1.268099000  |
| H  | 4.033526000  | 0.017097000  | 2.194647000  |
| H  | 3.758381000  | 1.208300000  | 0.921205000  |
| C  | 3.859547000  | -0.798253000 | 0.198729000  |
| C  | 5.095358000  | -1.443276000 | 0.215305000  |
| H  | 5.786254000  | -1.271674000 | 1.035148000  |
| C  | 5.426462000  | -2.302564000 | -0.833130000 |
| H  | 6.384389000  | -2.813831000 | -0.841078000 |
| C  | 4.507065000  | -2.496858000 | -1.862505000 |
| H  | 4.720694000  | -3.157513000 | -2.695829000 |
| C  | 3.287475000  | -1.826579000 | -1.801410000 |
| H  | 2.532046000  | -1.941631000 | -2.572273000 |
| C  | 1.545341000  | -0.941264000 | 2.278392000  |
| H  | 1.742550000  | -0.819427000 | 3.353501000  |
| H  | 2.127171000  | -1.807297000 | 1.940901000  |
| C  | 0.072370000  | -1.223273000 | 2.043966000  |
| C  | -0.721818000 | -1.716743000 | 3.065200000  |
| H  | -0.317727000 | -1.856671000 | 4.061886000  |
| C  | -2.056792000 | -2.034394000 | 2.766795000  |
| H  | -2.710956000 | -2.423637000 | 3.541476000  |

|            |              |              |              |
|------------|--------------|--------------|--------------|
| C          | -2.545360000 | -1.839590000 | 1.492018000  |
| H          | -3.580473000 | -2.046971000 | 1.254153000  |
| C          | -1.679858000 | -1.316237000 | 0.496446000  |
| C          | -3.404618000 | -1.467513000 | -1.307439000 |
| N          | 1.079140000  | 2.117239000  | -0.289921000 |
| N          | 2.017793000  | 0.223029000  | 1.503603000  |
| N          | 2.969622000  | -0.995219000 | -0.795956000 |
| N          | -0.385198000 | -1.020503000 | 0.785092000  |
| N          | -2.100420000 | -1.086217000 | -0.774113000 |
| H          | -1.405049000 | -0.740752000 | -1.424288000 |
| O          | 0.191193000  | -0.024281000 | -2.269232000 |
| O          | 0.626107000  | -0.825799000 | -3.151329000 |
| H          | -3.313407000 | -1.391357000 | -2.396895000 |
| H          | -3.600824000 | -2.526304000 | -1.090991000 |
| C          | -4.578143000 | -0.623275000 | -0.829052000 |
| C          | -5.812524000 | -1.232614000 | -0.575455000 |
| C          | -4.464542000 | 0.764806000  | -0.685123000 |
| C          | -6.916826000 | -0.470083000 | -0.188472000 |
| H          | -5.914263000 | -2.310553000 | -0.685825000 |
| C          | -5.565034000 | 1.527870000  | -0.294472000 |
| H          | -3.509748000 | 1.248147000  | -0.877619000 |
| C          | -6.794710000 | 0.912644000  | -0.045825000 |
| H          | -7.868316000 | -0.957391000 | 0.004708000  |
| H          | -5.464791000 | 2.604541000  | -0.186883000 |
| H          | -7.651166000 | 1.507857000  | 0.257589000  |
| <b>'6c</b> |              |              |              |
| Cu         | 1.042419000  | -0.043405000 | -0.521801000 |
| C          | 0.963910000  | 2.965507000  | -1.348841000 |
| H          | 0.590528000  | 2.586447000  | -2.295417000 |
| C          | 1.219301000  | 4.322880000  | -1.174084000 |
| H          | 1.043382000  | 5.018120000  | -1.988019000 |
| C          | 1.709461000  | 4.751872000  | 0.058304000  |
| H          | 1.930242000  | 5.800432000  | 0.233750000  |
| C          | 1.918890000  | 3.808323000  | 1.063656000  |
| H          | 2.303387000  | 4.107138000  | 2.034227000  |
| C          | 1.626245000  | 2.466204000  | 0.817510000  |
| C          | 1.764713000  | 1.422083000  | 1.920540000  |
| H          | 2.454338000  | 1.792983000  | 2.695135000  |
| H          | 0.785232000  | 1.308882000  | 2.401534000  |



|   |              |              |              |
|---|--------------|--------------|--------------|
| C | 3.557527000  | -0.020296000 | 1.023736000  |
| H | 4.197390000  | -0.333988000 | 1.863630000  |
| H | 3.904079000  | 0.976258000  | 0.722770000  |
| C | 3.772523000  | -0.959331000 | -0.159338000 |
| C | 4.956100000  | -1.688409000 | -0.282193000 |
| H | 5.704117000  | -1.638425000 | 0.503377000  |
| C | 5.166039000  | -2.470448000 | -1.417407000 |
| H | 6.082258000  | -3.042220000 | -1.529566000 |
| C | 4.177368000  | -2.507886000 | -2.399417000 |
| H | 4.293411000  | -3.102340000 | -3.299366000 |
| C | 3.016546000  | -1.766648000 | -2.198345000 |
| H | 2.216482000  | -1.775950000 | -2.932293000 |
| C | 1.611827000  | -1.035388000 | 2.160327000  |
| H | 1.810449000  | -0.956484000 | 3.240424000  |
| H | 2.139469000  | -1.929772000 | 1.806256000  |
| C | 0.120096000  | -1.243366000 | 1.930041000  |
| C | -0.698397000 | -1.688089000 | 2.957082000  |
| H | -0.297570000 | -1.839096000 | 3.953574000  |
| C | -2.048219000 | -1.939278000 | 2.670101000  |
| H | -2.716713000 | -2.286726000 | 3.452359000  |
| C | -2.534449000 | -1.736630000 | 1.392728000  |
| H | -3.578890000 | -1.898395000 | 1.159418000  |
| C | -1.645497000 | -1.271925000 | 0.395038000  |
| C | -3.340138000 | -1.427141000 | -1.442651000 |
| N | 1.158653000  | 2.052118000  | -0.381561000 |
| N | 2.150396000  | 0.104679000  | 1.408235000  |
| N | 2.809927000  | -1.007525000 | -1.107410000 |
| N | -0.342349000 | -1.031410000 | 0.673762000  |
| N | -2.048390000 | -1.028624000 | -0.887818000 |
| H | -1.294584000 | -0.849699000 | -1.538346000 |
| H | -3.230358000 | -1.363643000 | -2.531430000 |
| H | -3.542668000 | -2.483323000 | -1.214983000 |
| C | -4.519475000 | -0.574622000 | -0.996438000 |
| C | -5.763589000 | -1.176802000 | -0.774849000 |
| C | -4.400655000 | 0.812734000  | -0.850413000 |
| C | -6.873081000 | -0.407048000 | -0.418450000 |
| H | -5.868588000 | -2.254370000 | -0.885351000 |
| C | -5.506642000 | 1.582604000  | -0.489626000 |
| H | -3.436886000 | 1.288267000  | -1.013889000 |

|   |              |              |              |
|---|--------------|--------------|--------------|
| C | -6.746286000 | 0.975128000  | -0.273867000 |
| H | -7.832182000 | -0.888368000 | -0.249602000 |
| H | -5.402189000 | 2.658445000  | -0.378186000 |
| H | -7.606675000 | 1.575742000  | 0.006896000  |

**<sup>3</sup>6d**

|    |              |             |              |
|----|--------------|-------------|--------------|
| Cu | -0.832316000 | 2.177795000 | 0.080846000  |
| C  | -1.111711000 | 2.533147000 | -3.068549000 |
| H  | -0.540207000 | 1.609244000 | -3.067876000 |
| C  | -1.456123000 | 3.187481000 | -4.248973000 |
| H  | -1.157991000 | 2.777935000 | -5.208347000 |
| C  | -2.177741000 | 4.378588000 | -4.161962000 |
| H  | -2.458049000 | 4.922588000 | -5.058905000 |
| C  | -2.527161000 | 4.869689000 | -2.903222000 |
| H  | -3.082036000 | 5.797453000 | -2.801403000 |
| C  | -2.151607000 | 4.148339000 | -1.769758000 |
| C  | -2.540363000 | 4.581046000 | -0.368107000 |
| H  | -2.735111000 | 5.662498000 | -0.335165000 |
| H  | -3.474426000 | 4.079465000 | -0.090739000 |
| C  | -0.339386000 | 5.079158000 | 0.583662000  |
| H  | -0.520726000 | 6.003858000 | 1.150763000  |
| H  | -0.179710000 | 5.372522000 | -0.460906000 |
| C  | 0.915828000  | 4.387803000 | 1.076874000  |
| C  | 1.962117000  | 5.109403000 | 1.650997000  |
| H  | 1.857899000  | 6.177179000 | 1.818290000  |
| C  | 3.138512000  | 4.442373000 | 1.990465000  |
| H  | 3.970112000  | 4.985094000 | 2.429573000  |
| C  | 3.228281000  | 3.071360000 | 1.752704000  |
| H  | 4.132818000  | 2.518030000 | 1.977340000  |
| C  | 2.131534000  | 2.417856000 | 1.196651000  |
| H  | 2.142504000  | 1.353126000 | 0.986979000  |
| C  | -2.056162000 | 4.017634000 | 1.981323000  |
| H  | -2.610183000 | 4.908856000 | 2.309093000  |
| H  | -1.200334000 | 3.901601000 | 2.657122000  |
| C  | -2.937594000 | 2.788826000 | 2.062643000  |
| C  | -4.091414000 | 2.780923000 | 2.826892000  |
| H  | -4.399144000 | 3.665300000 | 3.373900000  |
| C  | -4.854446000 | 1.602153000 | 2.856053000  |
| H  | -5.770879000 | 1.560452000 | 3.437297000  |

|    |              |              |              |
|----|--------------|--------------|--------------|
| C  | -4.454944000 | 0.502341000  | 2.125086000  |
| H  | -5.057376000 | -0.396375000 | 2.101576000  |
| C  | -3.261532000 | 0.579507000  | 1.361404000  |
| N  | -1.454456000 | 2.999817000  | -1.858876000 |
| N  | -1.511495000 | 4.186543000  | 0.617554000  |
| N  | 0.996844000  | 3.058108000  | 0.865794000  |
| N  | -2.515986000 | 1.714608000  | 1.350168000  |
| N  | -2.807331000 | -0.461848000 | 0.617047000  |
| O  | -0.297103000 | 0.444190000  | -0.700284000 |
| O  | 0.860653000  | -0.118536000 | -0.237042000 |
| Cu | 0.831626000  | -2.038578000 | 0.148937000  |
| C  | -1.053783000 | -2.180245000 | -2.411394000 |
| H  | -1.048433000 | -1.101481000 | -2.290226000 |
| C  | -1.795270000 | -2.809368000 | -3.407564000 |
| H  | -2.390048000 | -2.221145000 | -4.097877000 |
| C  | -1.762104000 | -4.202012000 | -3.484651000 |
| H  | -2.334429000 | -4.729323000 | -4.241781000 |
| C  | -0.983786000 | -4.910477000 | -2.570029000 |
| H  | -0.934828000 | -5.994748000 | -2.602694000 |
| C  | -0.257030000 | -4.206019000 | -1.609125000 |
| C  | 0.686783000  | -4.914224000 | -0.656137000 |
| H  | 0.343566000  | -5.940174000 | -0.461276000 |
| H  | 1.665947000  | -4.996378000 | -1.142143000 |
| C  | -0.208975000 | -4.394644000 | 1.571028000  |
| H  | -0.093836000 | -5.359881000 | 2.085049000  |
| H  | -1.148132000 | -4.442055000 | 1.006180000  |
| C  | -0.301255000 | -3.261956000 | 2.575735000  |
| C  | -0.722675000 | -3.463073000 | 3.889835000  |
| H  | -0.958594000 | -4.463474000 | 4.239472000  |
| C  | -0.828297000 | -2.362925000 | 4.741882000  |
| H  | -1.149539000 | -2.496172000 | 5.770482000  |
| C  | -0.504840000 | -1.095697000 | 4.256105000  |
| H  | -0.566135000 | -0.216955000 | 4.889159000  |
| C  | -0.085619000 | -0.976914000 | 2.933799000  |
| H  | 0.184763000  | -0.018166000 | 2.503809000  |
| C  | 2.219145000  | -4.394899000 | 1.190439000  |
| H  | 2.432824000  | -5.468731000 | 1.284262000  |
| H  | 2.204494000  | -3.976827000 | 2.203641000  |
| C  | 3.297588000  | -3.704681000 | 0.382653000  |

|   |              |              |              |
|---|--------------|--------------|--------------|
| C | 4.524086000  | -4.307657000 | 0.166906000  |
| H | 4.724090000  | -5.306794000 | 0.538205000  |
| C | 5.499639000  | -3.580357000 | -0.535788000 |
| H | 6.477437000  | -4.015164000 | -0.720348000 |
| C | 5.216807000  | -2.309415000 | -0.989624000 |
| H | 5.965792000  | -1.726959000 | -1.510602000 |
| C | 3.931074000  | -1.758669000 | -0.744409000 |
| N | -0.303378000 | -2.861509000 | -1.527772000 |
| N | 0.879947000  | -4.163556000 | 0.601031000  |
| N | 0.013107000  | -2.034810000 | 2.113071000  |
| N | 2.988227000  | -2.464138000 | -0.067547000 |
| N | 3.590658000  | -0.509295000 | -1.156530000 |
| H | 2.631287000  | -0.220292000 | -0.982245000 |
| H | -1.940392000 | -0.308658000 | 0.105950000  |
| C | 4.432931000  | 0.358675000  | -1.965219000 |
| C | -3.486336000 | -1.742925000 | 0.485205000  |
| H | 3.769909000  | 1.126596000  | -2.379349000 |
| H | 4.818462000  | -0.199879000 | -2.829995000 |
| C | 5.595589000  | 1.033104000  | -1.239849000 |
| C | 6.487405000  | 1.811104000  | -1.991306000 |
| C | 5.806403000  | 0.906482000  | 0.136604000  |
| C | 7.561621000  | 2.455452000  | -1.378946000 |
| H | 6.342847000  | 1.912229000  | -3.065316000 |
| C | 6.888871000  | 1.544874000  | 0.751502000  |
| H | 5.134219000  | 0.293291000  | 0.730166000  |
| C | 7.766763000  | 2.323350000  | -0.002646000 |
| H | 8.243511000  | 3.053497000  | -1.976586000 |
| H | 7.052277000  | 1.420858000  | 1.819053000  |
| H | 8.609947000  | 2.815127000  | 0.473422000  |
| H | -2.758709000 | -2.413535000 | 0.014298000  |
| H | -3.689001000 | -2.161555000 | 1.480667000  |
| C | -4.774770000 | -1.729193000 | -0.328697000 |
| C | -5.822239000 | -2.590279000 | 0.019424000  |
| C | -4.917839000 | -0.907347000 | -1.453339000 |
| C | -6.990635000 | -2.635677000 | -0.744192000 |
| H | -5.727515000 | -3.230177000 | 0.894991000  |
| C | -6.086763000 | -0.947319000 | -2.215006000 |
| H | -4.116385000 | -0.224621000 | -1.725486000 |
| C | -7.125498000 | -1.812965000 | -1.863690000 |

|   |              |              |              |
|---|--------------|--------------|--------------|
| H | -7.796519000 | -3.305827000 | -0.459317000 |
| H | -6.189956000 | -0.300294000 | -3.081922000 |
| H | -8.035902000 | -1.841503000 | -2.455032000 |

**26b**

|    |              |              |              |
|----|--------------|--------------|--------------|
| Cu | -1.068744000 | -0.024117000 | -0.467236000 |
| C  | -0.828814000 | -3.019210000 | -1.301053000 |
| H  | -0.552351000 | -2.568698000 | -2.249285000 |
| C  | -0.928603000 | -4.397392000 | -1.126645000 |
| H  | -0.730944000 | -5.066857000 | -1.956919000 |
| C  | -1.291344000 | -4.884941000 | 0.129221000  |
| H  | -1.387593000 | -5.952982000 | 0.299991000  |
| C  | -1.532206000 | -3.983547000 | 1.167492000  |
| H  | -1.814084000 | -4.333102000 | 2.156035000  |
| C  | -1.397304000 | -2.618449000 | 0.917512000  |
| C  | -1.545561000 | -1.569286000 | 2.003131000  |
| H  | -2.202072000 | -1.927965000 | 2.808689000  |
| H  | -0.559862000 | -1.389086000 | 2.447884000  |
| C  | -3.475143000 | -0.279921000 | 1.197454000  |
| H  | -4.047318000 | -0.143215000 | 2.126538000  |
| H  | -3.738576000 | -1.267064000 | 0.798520000  |
| C  | -3.850863000 | 0.777568000  | 0.177653000  |
| C  | -5.080018000 | 1.434002000  | 0.207583000  |
| H  | -5.792717000 | 1.220211000  | 0.998271000  |
| C  | -5.372620000 | 2.365303000  | -0.790019000 |
| H  | -6.323917000 | 2.888878000  | -0.788200000 |
| C  | -4.421927000 | 2.620160000  | -1.777088000 |
| H  | -4.604075000 | 3.344635000  | -2.563626000 |
| C  | -3.212290000 | 1.930073000  | -1.733267000 |
| H  | -2.424689000 | 2.089662000  | -2.462387000 |
| C  | -1.587251000 | 0.876578000  | 2.274167000  |
| H  | -1.809925000 | 0.713847000  | 3.338002000  |
| H  | -2.178737000 | 1.739446000  | 1.947443000  |
| C  | -0.116847000 | 1.187716000  | 2.073820000  |
| C  | 0.656299000  | 1.691529000  | 3.104928000  |
| H  | 0.244090000  | 1.817850000  | 4.100128000  |
| C  | 1.986536000  | 2.041793000  | 2.811988000  |
| H  | 2.627955000  | 2.439760000  | 3.593038000  |
| C  | 2.486359000  | 1.870842000  | 1.538926000  |

|   |              |              |              |
|---|--------------|--------------|--------------|
| H | 3.517351000  | 2.106880000  | 1.309324000  |
| C | 1.640558000  | 1.333434000  | 0.529526000  |
| C | 3.356671000  | 1.517400000  | -1.264834000 |
| N | -1.061293000 | -2.155600000 | -0.301108000 |
| N | -2.019822000 | -0.279942000 | 1.454253000  |
| N | -2.936156000 | 1.023388000  | -0.781953000 |
| N | 0.352320000  | 1.002745000  | 0.819231000  |
| N | 2.054415000  | 1.127389000  | -0.740440000 |
| H | 1.363518000  | 0.726954000  | -1.381134000 |
| O | -0.130132000 | -0.068936000 | -2.139155000 |
| O | -0.544968000 | 0.963435000  | -3.043706000 |
| H | -0.999407000 | 0.442847000  | -3.731541000 |
| H | 3.266647000  | 1.458099000  | -2.355355000 |
| H | 3.552335000  | 2.572899000  | -1.032217000 |
| C | 4.532756000  | 0.668396000  | -0.799099000 |
| C | 5.765695000  | 1.274190000  | -0.530555000 |
| C | 4.421379000  | -0.722366000 | -0.679870000 |
| C | 6.869890000  | 0.506727000  | -0.152854000 |
| H | 5.866149000  | 2.354114000  | -0.621585000 |
| C | 5.521668000  | -1.490743000 | -0.299110000 |
| H | 3.467708000  | -1.202784000 | -0.885109000 |
| C | 6.749626000  | -0.878475000 | -0.034979000 |
| H | 7.819948000  | 0.992048000  | 0.052499000  |
| H | 5.422811000  | -2.569455000 | -0.211334000 |
| H | 7.605978000  | -1.477694000 | 0.261001000  |

**<sup>3</sup>TS<sub>R16</sub>**

|    |              |              |              |
|----|--------------|--------------|--------------|
| Cu | -1.628553000 | -1.193679000 | -0.157251000 |
| C  | -0.229440000 | -0.760280000 | 2.606947000  |
| H  | 0.502952000  | -0.250984000 | 1.988464000  |
| C  | -0.047882000 | -0.924472000 | 3.978808000  |
| H  | 0.842832000  | -0.532620000 | 4.458168000  |
| C  | -1.024729000 | -1.605001000 | 4.704673000  |
| H  | -0.913414000 | -1.758884000 | 5.773944000  |
| C  | -2.148556000 | -2.094018000 | 4.037322000  |
| H  | -2.925821000 | -2.631266000 | 4.572517000  |
| C  | -2.265140000 | -1.878574000 | 2.664208000  |
| C  | -3.494617000 | -2.307939000 | 1.882629000  |
| H  | -4.007150000 | -3.136070000 | 2.395150000  |

|   |              |              |              |
|---|--------------|--------------|--------------|
| H | -4.197256000 | -1.466497000 | 1.855839000  |
| C | -2.549232000 | -3.975439000 | 0.345499000  |
| H | -3.300910000 | -4.779341000 | 0.355795000  |
| H | -1.902502000 | -4.131048000 | 1.217802000  |
| C | -1.692428000 | -4.066625000 | -0.905352000 |
| C | -1.544585000 | -5.258734000 | -1.613105000 |
| H | -2.091985000 | -6.145146000 | -1.306924000 |
| C | -0.684524000 | -5.290638000 | -2.711919000 |
| H | -0.554386000 | -6.207737000 | -3.278835000 |
| C | -0.001981000 | -4.129450000 | -3.070437000 |
| H | 0.675130000  | -4.110241000 | -3.917737000 |
| C | -0.210180000 | -2.974037000 | -2.319081000 |
| H | 0.294944000  | -2.038912000 | -2.540421000 |
| C | -4.303201000 | -2.444435000 | -0.434605000 |
| H | -5.214117000 | -2.941038000 | -0.068615000 |
| H | -4.033879000 | -2.921698000 | -1.384310000 |
| C | -4.569898000 | -0.973752000 | -0.692012000 |
| C | -5.865028000 | -0.497627000 | -0.814215000 |
| H | -6.713996000 | -1.157526000 | -0.671917000 |
| C | -6.037545000 | 0.860525000  | -1.128645000 |
| H | -7.036840000 | 1.276136000  | -1.221543000 |
| C | -4.938333000 | 1.672287000  | -1.313049000 |
| H | -5.055238000 | 2.725911000  | -1.531336000 |
| C | -3.638785000 | 1.113819000  | -1.178144000 |
| C | -2.477423000 | 3.246952000  | -1.754423000 |
| N | -1.314531000 | -1.226256000 | 1.968200000  |
| N | -3.167989000 | -2.646554000 | 0.485969000  |
| N | -1.038224000 | -2.944035000 | -1.263195000 |
| N | -3.475903000 | -0.194908000 | -0.848699000 |
| N | -2.512772000 | 1.840048000  | -1.381179000 |
| H | -1.630396000 | 1.353717000  | -1.239379000 |
| O | -0.303122000 | 0.201363000  | -0.535209000 |
| O | 0.743235000  | -0.143910000 | -1.302050000 |
| C | 6.105366000  | -0.143249000 | -0.071964000 |
| C | 6.428547000  | 1.186939000  | -0.379297000 |
| C | 5.422428000  | 2.169235000  | -0.438892000 |
| C | 4.089674000  | 1.869473000  | -0.219068000 |
| C | 3.758231000  | 0.489375000  | 0.064757000  |
| C | 4.786729000  | -0.519398000 | 0.156719000  |

|   |              |              |              |
|---|--------------|--------------|--------------|
| H | 6.894945000  | -0.877627000 | -0.013407000 |
| H | 5.750355000  | 3.177220000  | -0.653563000 |
| H | 1.766621000  | 0.077773000  | -0.488077000 |
| O | 2.507050000  | 0.123221000  | 0.322427000  |
| C | 3.032659000  | 2.997143000  | -0.289310000 |
| C | 2.221510000  | 2.863348000  | -1.603115000 |
| C | 2.082224000  | 2.970649000  | 0.933497000  |
| C | 3.694508000  | 4.393884000  | -0.304600000 |
| H | 2.881572000  | 2.943937000  | -2.474504000 |
| H | 1.682600000  | 1.916533000  | -1.671508000 |
| H | 1.487471000  | 3.677000000  | -1.664550000 |
| H | 2.649725000  | 3.042130000  | 1.869032000  |
| H | 1.408367000  | 3.834229000  | 0.886292000  |
| H | 1.477844000  | 2.065184000  | 0.966718000  |
| H | 2.910567000  | 5.158324000  | -0.297595000 |
| H | 4.326729000  | 4.558716000  | 0.575123000  |
| H | 4.297878000  | 4.563643000  | -1.202635000 |
| C | 4.449067000  | -1.986497000 | 0.503992000  |
| C | 3.788195000  | -2.063520000 | 1.903712000  |
| C | 3.507318000  | -2.591870000 | -0.566451000 |
| C | 5.710956000  | -2.874886000 | 0.550937000  |
| H | 4.461926000  | -1.666736000 | 2.672277000  |
| H | 2.854506000  | -1.501424000 | 1.936892000  |
| H | 3.576008000  | -3.110285000 | 2.154110000  |
| H | 3.975586000  | -2.561595000 | -1.557556000 |
| H | 3.305062000  | -3.642720000 | -0.325155000 |
| H | 2.554031000  | -2.064899000 | -0.617661000 |
| H | 5.417130000  | -3.898861000 | 0.804371000  |
| H | 6.227552000  | -2.914814000 | -0.414938000 |
| H | 6.423698000  | -2.543401000 | 1.314560000  |
| O | 7.676659000  | 1.633096000  | -0.622483000 |
| C | 8.774133000  | 0.721428000  | -0.580777000 |
| H | 9.657275000  | 1.315813000  | -0.815852000 |
| H | 8.883352000  | 0.280324000  | 0.416680000  |
| H | 8.656398000  | -0.072748000 | -1.326993000 |
| H | -1.452980000 | 3.438848000  | -2.093554000 |
| H | -3.122812000 | 3.416730000  | -2.626192000 |
| C | -2.844254000 | 4.226949000  | -0.646940000 |
| C | -3.619531000 | 5.354917000  | -0.937748000 |



|   |              |             |              |
|---|--------------|-------------|--------------|
| C | -2.375885000 | 4.044652000 | 0.660543000  |
| C | -3.922070000 | 6.287483000 | 0.057410000  |
| C | -2.679429000 | 4.972776000 | 1.656724000  |
| C | -3.453286000 | 6.097476000 | 1.357748000  |
| H | -1.773600000 | 3.170640000 | 0.896691000  |
| H | -2.309900000 | 4.820526000 | 2.667358000  |
| H | -3.689647000 | 6.819631000 | 2.134118000  |
| H | -4.526708000 | 7.157435000 | -0.183478000 |
| H | -3.987618000 | 5.508979000 | -1.950388000 |

${}^3T_{6d}^{6a}$

|    |              |             |              |
|----|--------------|-------------|--------------|
| Cu | -2.044504000 | 1.891711000 | 0.101897000  |
| C  | -2.289165000 | 1.806584000 | -3.030525000 |
| H  | -1.411593000 | 1.170453000 | -2.954433000 |
| C  | -2.794414000 | 2.196632000 | -4.268090000 |
| H  | -2.316577000 | 1.862394000 | -5.183030000 |
| C  | -3.912587000 | 3.029580000 | -4.294796000 |
| H  | -4.333372000 | 3.364237000 | -5.238175000 |
| C  | -4.478041000 | 3.436328000 | -3.086335000 |
| H  | -5.344535000 | 4.090598000 | -3.071279000 |
| C  | -3.919727000 | 2.993246000 | -1.886226000 |
| C  | -4.543050000 | 3.358037000 | -0.544958000 |
| H  | -5.171929000 | 4.254452000 | -0.656274000 |
| H  | -5.210479000 | 2.541224000 | -0.244877000 |
| C  | -2.783798000 | 4.766763000 | 0.449300000  |
| H  | -3.265617000 | 5.567888000 | 1.030867000  |
| H  | -2.782857000 | 5.100977000 | -0.595706000 |
| C  | -1.329338000 | 4.622222000 | 0.880564000  |
| C  | -0.629038000 | 5.723213000 | 1.377799000  |
| H  | -1.146794000 | 6.664103000 | 1.539002000  |
| C  | 0.733098000  | 5.603803000 | 1.645869000  |
| H  | 1.295738000  | 6.452901000 | 2.021980000  |
| C  | 1.358502000  | 4.377705000 | 1.418445000  |
| H  | 2.421299000  | 4.243806000 | 1.589027000  |
| C  | 0.587090000  | 3.318719000 | 0.949670000  |
| H  | 1.024871000  | 2.341924000 | 0.764213000  |
| C  | -3.996243000 | 3.149239000 | 1.857618000  |
| H  | -4.909443000 | 3.692055000 | 2.145951000  |
| H  | -3.208656000 | 3.453505000 | 2.558516000  |

|    |              |              |              |
|----|--------------|--------------|--------------|
| C  | -4.224033000 | 1.652960000  | 2.000488000  |
| C  | -5.305876000 | 1.168092000  | 2.718488000  |
| H  | -6.021934000 | 1.850949000  | 3.162465000  |
| C  | -5.454645000 | -0.221117000 | 2.840287000  |
| H  | -6.298678000 | -0.634465000 | 3.384443000  |
| C  | -4.535139000 | -1.066617000 | 2.250892000  |
| H  | -4.654906000 | -2.141000000 | 2.307107000  |
| C  | -3.449278000 | -0.503976000 | 1.538188000  |
| N  | -2.835204000 | 2.188631000  | -1.864200000 |
| N  | -3.534254000 | 3.510685000  | 0.510336000  |
| N  | -0.727409000 | 3.429500000  | 0.685504000  |
| N  | -3.309807000 | 0.838086000  | 1.415162000  |
| N  | -2.482872000 | -1.276834000 | 0.959726000  |
| O  | -0.213318000 | 0.041853000  | -0.687788000 |
| O  | 1.020833000  | 0.030137000  | -0.285928000 |
| Cu | 1.873857000  | -1.739491000 | 0.080667000  |
| C  | -0.060720000 | -2.818664000 | -2.191027000 |
| H  | -0.520404000 | -1.841419000 | -2.083916000 |
| C  | -0.575687000 | -3.777445000 | -3.059379000 |
| H  | -1.460784000 | -3.558368000 | -3.646253000 |
| C  | 0.057721000  | -5.017528000 | -3.133002000 |
| H  | -0.317711000 | -5.793655000 | -3.792899000 |
| C  | 1.178645000  | -5.252263000 | -2.336252000 |
| H  | 1.691487000  | -6.208832000 | -2.364378000 |
| C  | 1.637729000  | -4.238509000 | -1.496012000 |
| C  | 2.887287000  | -4.404327000 | -0.653374000 |
| H  | 3.073273000  | -5.466159000 | -0.438984000 |
| H  | 3.747763000  | -4.037651000 | -1.225083000 |
| C  | 1.964270000  | -4.235094000 | 1.621307000  |
| H  | 2.503321000  | -5.030535000 | 2.155211000  |
| H  | 1.118447000  | -4.709058000 | 1.108899000  |
| C  | 1.424248000  | -3.206608000 | 2.597479000  |
| C  | 1.172771000  | -3.513414000 | 3.934122000  |
| H  | 1.410524000  | -4.499518000 | 4.321137000  |
| C  | 0.615819000  | -2.535581000 | 4.759788000  |
| H  | 0.414820000  | -2.751197000 | 5.804803000  |
| C  | 0.331122000  | -1.279201000 | 4.225183000  |
| H  | -0.097859000 | -0.490369000 | 4.833689000  |
| C  | 0.620078000  | -1.046792000 | 2.883111000  |

|   |              |              |              |
|---|--------------|--------------|--------------|
| H | 0.425011000  | -0.084860000 | 2.420203000  |
| C | 4.149988000  | -3.236513000 | 1.105122000  |
| H | 4.803683000  | -4.116146000 | 1.183576000  |
| H | 4.007600000  | -2.847697000 | 2.120288000  |
| C | 4.798385000  | -2.165956000 | 0.253572000  |
| C | 6.160788000  | -2.182634000 | 0.017018000  |
| H | 6.777191000  | -2.993039000 | 0.390239000  |
| C | 6.719057000  | -1.112748000 | -0.702047000 |
| H | 7.786477000  | -1.084580000 | -0.899145000 |
| C | 5.909997000  | -0.091670000 | -1.151781000 |
| H | 6.328529000  | 0.753236000  | -1.682945000 |
| C | 4.515686000  | -0.148840000 | -0.892754000 |
| N | 1.021556000  | -3.039749000 | -1.426072000 |
| N | 2.813759000  | -3.607061000 | 0.588474000  |
| N | 1.154522000  | -1.987105000 | 2.086889000  |
| N | 3.974841000  | -1.185727000 | -0.199865000 |
| N | 3.668917000  | 0.822591000  | -1.325690000 |
| H | 2.702344000  | 0.743109000  | -1.038344000 |
| H | -1.782295000 | -0.788838000 | 0.413847000  |
| C | 4.074473000  | 2.044033000  | -2.006840000 |
| C | -2.536308000 | -2.725460000 | 0.844753000  |
| H | 3.152782000  | 2.490073000  | -2.398312000 |
| H | 4.676515000  | 1.789016000  | -2.888403000 |
| C | 4.820099000  | 3.067477000  | -1.153976000 |
| C | 5.523849000  | 4.095936000  | -1.794379000 |
| C | 4.803000000  | 3.029453000  | 0.244412000  |
| C | 6.188676000  | 5.072708000  | -1.052517000 |
| H | 5.554980000  | 4.133915000  | -2.881516000 |
| C | 5.476666000  | 4.001940000  | 0.989728000  |
| H | 4.278649000  | 2.226155000  | 0.755643000  |
| C | 6.167596000  | 5.028273000  | 0.343690000  |
| H | 6.731512000  | 5.861875000  | -1.564597000 |
| H | 5.473145000  | 3.948471000  | 2.075428000  |
| H | 6.695397000  | 5.780977000  | 0.921821000  |
| H | -1.530545000 | -3.033194000 | 0.533698000  |
| H | -2.690890000 | -3.167320000 | 1.837542000  |
| C | -3.570144000 | -3.283568000 | -0.127858000 |
| C | -4.120627000 | -4.550210000 | 0.102671000  |
| C | -3.949590000 | -2.579663000 | -1.277383000 |

|   |              |              |              |
|---|--------------|--------------|--------------|
| C | -5.028135000 | -5.108188000 | -0.799841000 |
| H | -3.843780000 | -5.104606000 | 0.997622000  |
| C | -4.860785000 | -3.133734000 | -2.179212000 |
| H | -3.547244000 | -1.585604000 | -1.458388000 |
| C | -5.400609000 | -4.400377000 | -1.944388000 |
| H | -5.452246000 | -6.088596000 | -0.602881000 |
| H | -5.157663000 | -2.572355000 | -3.061173000 |
| H | -6.114256000 | -4.828146000 | -2.642364000 |

**<sup>37</sup>a**

|    |             |              |              |
|----|-------------|--------------|--------------|
| Cu | 1.796097000 | 0.041229000  | -0.408957000 |
| C  | 0.979020000 | 3.055481000  | -0.653725000 |
| H  | 0.771785000 | 2.775990000  | -1.682367000 |
| C  | 0.854451000 | 4.371778000  | -0.216584000 |
| H  | 0.542719000 | 5.146985000  | -0.908231000 |
| C  | 1.146286000 | 4.659474000  | 1.116387000  |
| H  | 1.070183000 | 5.675203000  | 1.492617000  |
| C  | 1.542670000 | 3.623299000  | 1.963037000  |
| H  | 1.777485000 | 3.814790000  | 3.005723000  |
| C  | 1.629142000 | 2.327844000  | 1.453672000  |
| C  | 1.962705000 | 1.138464000  | 2.339508000  |
| H  | 2.530589000 | 1.464550000  | 3.223160000  |
| H  | 1.022203000 | 0.710939000  | 2.706548000  |
| C  | 4.100047000 | 0.358534000  | 1.405595000  |
| H  | 4.690816000 | 0.102328000  | 2.297856000  |
| H  | 4.203715000 | 1.440203000  | 1.254616000  |
| C  | 4.655548000 | -0.351624000 | 0.183267000  |
| C  | 5.984880000 | -0.766450000 | 0.119575000  |
| H  | 6.637166000 | -0.632373000 | 0.977151000  |
| C  | 6.458537000 | -1.348580000 | -1.056911000 |
| H  | 7.491027000 | -1.677009000 | -1.128785000 |
| C  | 5.584790000 | -1.506546000 | -2.131300000 |
| H  | 5.908596000 | -1.956740000 | -3.063496000 |
| C  | 4.266900000 | -1.079329000 | -1.986254000 |
| H  | 3.541054000 | -1.181326000 | -2.786883000 |
| C  | 2.411860000 | -1.276589000 | 2.132509000  |
| H  | 2.587189000 | -1.324502000 | 3.217191000  |
| H  | 3.135950000 | -1.950689000 | 1.659662000  |
| C  | 1.011171000 | -1.762562000 | 1.805895000  |

|   |              |              |              |
|---|--------------|--------------|--------------|
| C | 0.304465000  | -2.544288000 | 2.705355000  |
| H | 0.720726000  | -2.782363000 | 3.678119000  |
| C | -0.959119000 | -3.015116000 | 2.317355000  |
| H | -1.545131000 | -3.627748000 | 2.996165000  |
| C | -1.467783000 | -2.691632000 | 1.075312000  |
| H | -2.450201000 | -3.034511000 | 0.777621000  |
| C | -0.690571000 | -1.884299000 | 0.206885000  |
| C | -2.445006000 | -1.773998000 | -1.574271000 |
| N | 1.357631000  | 2.057905000  | 0.161206000  |
| N | 2.667257000  | 0.075759000  | 1.598771000  |
| N | 3.811421000  | -0.513410000 | -0.856832000 |
| N | 0.530395000  | -1.428025000 | 0.585619000  |
| N | -1.108840000 | -1.542012000 | -1.043888000 |
| H | -0.538427000 | -0.863631000 | -1.536855000 |
| O | 0.908528000  | 0.219659000  | -2.215672000 |
| O | 1.444573000  | -0.366584000 | -3.203175000 |
| H | -2.381135000 | -1.613016000 | -2.654052000 |
| H | -2.730070000 | -2.818039000 | -1.428844000 |
| C | -3.518260000 | -0.869569000 | -0.989905000 |
| C | -4.600674000 | -1.367481000 | -0.266305000 |
| C | -3.455891000 | 0.513338000  | -1.166477000 |
| C | -5.583720000 | -0.534790000 | 0.266117000  |
| C | -4.418254000 | 1.372847000  | -0.648456000 |
| C | -5.491003000 | 0.841790000  | 0.069455000  |
| F | -4.322972000 | 2.692299000  | -0.831194000 |
| F | -6.418628000 | 1.652021000  | 0.574248000  |
| F | -6.601335000 | -1.044470000 | 0.960783000  |
| F | -4.707583000 | -2.692876000 | -0.050474000 |
| F | -2.424599000 | 1.039606000  | -1.855466000 |

**<sup>27</sup>b**

|    |              |              |              |
|----|--------------|--------------|--------------|
| Cu | -1.797876000 | -0.099416000 | -0.409659000 |
| C  | -1.012078000 | -3.095717000 | -0.673710000 |
| H  | -0.791817000 | -2.784425000 | -1.690009000 |
| C  | -0.878253000 | -4.415126000 | -0.248551000 |
| H  | -0.544519000 | -5.178866000 | -0.942684000 |
| C  | -1.187285000 | -4.722638000 | 1.076660000  |
| H  | -1.103960000 | -5.742292000 | 1.440609000  |
| C  | -1.607228000 | -3.703570000 | 1.933385000  |
| H  | -1.851871000 | -3.911773000 | 2.970542000  |

|   |              |              |              |
|---|--------------|--------------|--------------|
| C | -1.700340000 | -2.403902000 | 1.437258000  |
| C | -2.047002000 | -1.217281000 | 2.316936000  |
| H | -2.658403000 | -1.530340000 | 3.175140000  |
| H | -1.115458000 | -0.804332000 | 2.721188000  |
| C | -4.143555000 | -0.406112000 | 1.324246000  |
| H | -4.738659000 | -0.192451000 | 2.223976000  |
| H | -4.249176000 | -1.477720000 | 1.115189000  |
| C | -4.666551000 | 0.380839000  | 0.138034000  |
| C | -5.980834000 | 0.839756000  | 0.072380000  |
| H | -6.660496000 | 0.666575000  | 0.901144000  |
| C | -6.401392000 | 1.522806000  | -1.069910000 |
| H | -7.420853000 | 1.889188000  | -1.144363000 |
| C | -5.490945000 | 1.737472000  | -2.103427000 |
| H | -5.773071000 | 2.274265000  | -3.002820000 |
| C | -4.191426000 | 1.256086000  | -1.959223000 |
| H | -3.429563000 | 1.399654000  | -2.718316000 |
| C | -2.465125000 | 1.201545000  | 2.136796000  |
| H | -2.670661000 | 1.204604000  | 3.216375000  |
| H | -3.177158000 | 1.891152000  | 1.669341000  |
| C | -1.056189000 | 1.688118000  | 1.856973000  |
| C | -0.364586000 | 2.460294000  | 2.774711000  |
| H | -0.793925000 | 2.694342000  | 3.742767000  |
| C | 0.906142000  | 2.931868000  | 2.403310000  |
| H | 1.483070000  | 3.540159000  | 3.093908000  |
| C | 1.432859000  | 2.617905000  | 1.167247000  |
| H | 2.418866000  | 2.964573000  | 0.886230000  |
| C | 0.670073000  | 1.813738000  | 0.277793000  |
| C | 2.410142000  | 1.753862000  | -1.508870000 |
| N | -1.416538000 | -2.118865000 | 0.152553000  |
| N | -2.707519000 | -0.137998000 | 1.549671000  |
| N | -3.790740000 | 0.585995000  | -0.866655000 |
| N | -0.558937000 | 1.361519000  | 0.643983000  |
| N | 1.095717000  | 1.462976000  | -0.959794000 |
| H | 0.496323000  | 0.809803000  | -1.476167000 |
| O | -0.849042000 | -0.295574000 | -2.063575000 |
| O | -1.389657000 | 0.503590000  | -3.123022000 |
| H | -1.747712000 | -0.183713000 | -3.714831000 |
| H | 2.334430000  | 1.598868000  | -2.588614000 |
| H | 2.662790000  | 2.806051000  | -1.356826000 |

|   |             |              |              |
|---|-------------|--------------|--------------|
| C | 3.528197000 | 0.883909000  | -0.953921000 |
| C | 4.591155000 | 1.410692000  | -0.221896000 |
| C | 3.529080000 | -0.495621000 | -1.167277000 |
| C | 5.612892000 | 0.610638000  | 0.287051000  |
| C | 4.532282000 | -1.322728000 | -0.673541000 |
| C | 5.581978000 | -0.763018000 | 0.055806000  |
| F | 4.498004000 | -2.640346000 | -0.892200000 |
| F | 6.547874000 | -1.543316000 | 0.537252000  |
| F | 6.609950000 | 1.148692000  | 0.991464000  |
| F | 4.642330000 | 2.734410000  | 0.026805000  |
| F | 2.525604000 | -1.051956000 | -1.869629000 |

'7c

|    |              |              |              |
|----|--------------|--------------|--------------|
| Cu | 1.515701000  | 0.001859000  | -0.418016000 |
| C  | 0.057664000  | 2.739650000  | -0.417292000 |
| H  | -0.273803000 | 2.444276000  | -1.406382000 |
| C  | -0.237121000 | 4.002771000  | 0.088612000  |
| H  | -0.797991000 | 4.709237000  | -0.513636000 |
| C  | 0.206800000  | 4.325891000  | 1.369603000  |
| H  | 0.008423000  | 5.304548000  | 1.796141000  |
| C  | 0.910271000  | 3.367242000  | 2.098820000  |
| H  | 1.264747000  | 3.582464000  | 3.102444000  |
| C  | 1.150942000  | 2.114758000  | 1.532850000  |
| C  | 1.811926000  | 1.008147000  | 2.349516000  |
| H  | 2.395322000  | 1.453020000  | 3.170517000  |
| H  | 1.012599000  | 0.421855000  | 2.819420000  |
| C  | 3.935402000  | 0.581074000  | 1.166882000  |
| H  | 4.699073000  | 0.340009000  | 1.923022000  |
| H  | 3.872424000  | 1.675781000  | 1.124090000  |
| C  | 4.400173000  | 0.092105000  | -0.201088000 |
| C  | 5.755704000  | -0.114562000 | -0.459390000 |
| H  | 6.481764000  | 0.011175000  | 0.338193000  |
| C  | 6.162384000  | -0.476062000 | -1.743439000 |
| H  | 7.213423000  | -0.638930000 | -1.961911000 |
| C  | 5.195713000  | -0.628337000 | -2.736030000 |
| H  | 5.462058000  | -0.909199000 | -3.749388000 |
| C  | 3.861422000  | -0.420108000 | -2.398634000 |
| H  | 3.075464000  | -0.537730000 | -3.138368000 |
| C  | 2.567912000  | -1.316628000 | 1.978457000  |
| H  | 2.794909000  | -1.425168000 | 3.050169000  |

|                       |              |              |              |
|-----------------------|--------------|--------------|--------------|
| H                     | 3.353654000  | -1.849967000 | 1.429698000  |
| C                     | 1.234987000  | -1.983728000 | 1.664746000  |
| C                     | 0.610973000  | -2.821124000 | 2.577559000  |
| H                     | 1.047633000  | -2.993408000 | 3.555346000  |
| C                     | -0.599911000 | -3.424484000 | 2.206866000  |
| H                     | -1.123036000 | -4.071207000 | 2.905037000  |
| C                     | -1.131337000 | -3.199263000 | 0.949640000  |
| H                     | -2.068489000 | -3.655819000 | 0.655122000  |
| C                     | -0.428790000 | -2.353958000 | 0.062840000  |
| C                     | -2.206961000 | -2.202257000 | -1.693336000 |
| N                     | 0.740661000  | 1.813587000  | 0.280109000  |
| N                     | 2.607173000  | 0.084543000  | 1.536138000  |
| N                     | 3.463660000  | -0.068448000 | -1.162824000 |
| N                     | 0.710463000  | -1.734688000 | 0.440790000  |
| N                     | -0.822285000 | -2.138391000 | -1.238235000 |
| H                     | -0.261944000 | -1.433533000 | -1.704606000 |
| H                     | -2.182510000 | -2.185802000 | -2.786768000 |
| H                     | -2.649944000 | -3.156707000 | -1.407132000 |
| C                     | -3.067797000 | -1.060268000 | -1.178274000 |
| C                     | -4.182630000 | -1.267781000 | -0.367508000 |
| C                     | -2.743111000 | 0.261954000  | -1.480209000 |
| C                     | -4.949813000 | -0.208940000 | 0.119422000  |
| C                     | -3.477221000 | 1.339973000  | -1.004015000 |
| C                     | -4.593105000 | 1.100064000  | -0.200765000 |
| F                     | -3.116779000 | 2.594316000  | -1.301235000 |
| F                     | -5.306790000 | 2.121436000  | 0.266702000  |
| F                     | -6.008935000 | -0.439875000 | 0.894131000  |
| F                     | -4.537854000 | -2.518375000 | -0.029796000 |
| F                     | -1.656717000 | 0.512297000  | -2.250398000 |
| <b><sup>37</sup>d</b> |              |              |              |
| Cu                    | 0.164018000  | 1.804275000  | -0.612738000 |
| C                     | 0.280275000  | 2.544335000  | 2.435766000  |
| H                     | 0.139193000  | 1.472735000  | 2.536986000  |
| C                     | 0.326698000  | 3.395219000  | 3.537115000  |
| H                     | 0.226820000  | 2.995860000  | 4.540802000  |
| C                     | 0.496372000  | 4.762172000  | 3.315075000  |
| H                     | 0.528505000  | 5.458090000  | 4.147950000  |
| C                     | 0.620695000  | 5.227416000  | 2.005111000  |
| H                     | 0.751798000  | 6.285466000  | 1.799419000  |



|    |              |              |              |
|----|--------------|--------------|--------------|
| C  | 0.580292000  | 4.307539000  | 0.957715000  |
| C  | 0.800923000  | 4.715678000  | -0.486817000 |
| H  | 0.525483000  | 5.768364000  | -0.642020000 |
| H  | 1.870513000  | 4.629730000  | -0.711161000 |
| C  | -1.349527000 | 4.174968000  | -1.534004000 |
| H  | -1.501834000 | 5.057026000  | -2.172844000 |
| H  | -1.709350000 | 4.433363000  | -0.531438000 |
| C  | -2.167395000 | 3.002814000  | -2.034575000 |
| C  | -3.317218000 | 3.184859000  | -2.803260000 |
| H  | -3.614675000 | 4.183711000  | -3.107067000 |
| C  | -4.074078000 | 2.070760000  | -3.165058000 |
| H  | -4.971015000 | 2.188475000  | -3.765759000 |
| C  | -3.658785000 | 0.808300000  | -2.740976000 |
| H  | -4.220818000 | -0.084902000 | -2.993153000 |
| C  | -2.495776000 | 0.709483000  | -1.981240000 |
| H  | -2.133647000 | -0.240402000 | -1.603017000 |
| C  | 0.740557000  | 3.735609000  | -2.742389000 |
| H  | 0.953846000  | 4.731959000  | -3.154773000 |
| H  | 0.034738000  | 3.249178000  | -3.425969000 |
| C  | 2.010739000  | 2.912289000  | -2.670257000 |
| C  | 3.126762000  | 3.254627000  | -3.415964000 |
| H  | 3.123947000  | 4.139758000  | -4.042610000 |
| C  | 4.256517000  | 2.427538000  | -3.327686000 |
| H  | 5.151652000  | 2.663972000  | -3.895381000 |
| C  | 4.239331000  | 1.317929000  | -2.505260000 |
| H  | 5.115637000  | 0.689328000  | -2.415693000 |
| C  | 3.065453000  | 1.031663000  | -1.764217000 |
| N  | 0.406192000  | 2.991087000  | 1.177844000  |
| N  | 0.079142000  | 3.826784000  | -1.422741000 |
| N  | -1.757542000 | 1.779322000  | -1.643076000 |
| N  | 1.968919000  | 1.825719000  | -1.861617000 |
| N  | 2.961700000  | -0.051119000 | -0.941347000 |
| O  | 0.320586000  | 0.090713000  | 0.344552000  |
| O  | -0.742734000 | -0.744270000 | 0.157144000  |
| Cu | -0.478848000 | -2.632508000 | -0.232957000 |
| C  | 1.572398000  | -2.538629000 | 2.170668000  |
| H  | 1.519121000  | -1.470830000 | 1.987924000  |
| C  | 2.404128000  | -3.075469000 | 3.150236000  |
| H  | 3.020114000  | -2.419255000 | 3.755487000  |

|   |              |              |              |
|---|--------------|--------------|--------------|
| C | 2.422983000  | -4.460436000 | 3.320681000  |
| H | 3.060531000  | -4.917708000 | 4.071367000  |
| C | 1.613510000  | -5.255645000 | 2.508063000  |
| H | 1.608287000  | -6.336218000 | 2.615231000  |
| C | 0.802515000  | -4.640844000 | 1.553406000  |
| C | -0.165853000 | -5.432130000 | 0.690381000  |
| H | 0.194257000  | -6.460393000 | 0.545094000  |
| H | -1.123176000 | -5.502019000 | 1.218657000  |
| C | 0.663683000  | -4.991739000 | -1.577186000 |
| H | 0.563060000  | -5.969083000 | -2.070702000 |
| H | 1.608313000  | -5.011296000 | -1.020257000 |
| C | 0.739484000  | -3.879536000 | -2.605457000 |
| C | 1.211265000  | -4.102871000 | -3.898856000 |
| H | 1.481106000  | -5.106274000 | -4.213598000 |
| C | 1.329869000  | -3.022119000 | -4.772783000 |
| H | 1.692766000  | -3.173234000 | -5.784917000 |
| C | 0.970665000  | -1.750010000 | -4.327172000 |
| H | 1.048067000  | -0.882894000 | -4.974318000 |
| C | 0.498160000  | -1.609261000 | -3.025455000 |
| H | 0.204536000  | -0.642229000 | -2.632323000 |
| C | -1.754976000 | -5.070861000 | -1.164348000 |
| H | -1.919587000 | -6.155684000 | -1.231114000 |
| H | -1.770633000 | -4.679301000 | -2.188765000 |
| C | -2.862335000 | -4.420230000 | -0.358422000 |
| C | -4.089103000 | -5.044118000 | -0.206244000 |
| H | -4.271031000 | -6.024453000 | -0.632952000 |
| C | -5.088585000 | -4.358768000 | 0.501429000  |
| H | -6.076412000 | -4.796216000 | 0.612019000  |
| C | -4.817892000 | -3.127673000 | 1.064676000  |
| H | -5.591114000 | -2.585093000 | 1.592688000  |
| C | -3.518310000 | -2.576635000 | 0.923700000  |
| N | 0.792485000  | -3.303971000 | 1.390366000  |
| N | -0.420421000 | -4.761841000 | -0.603101000 |
| N | 0.379817000  | -2.649400000 | -2.183646000 |
| N | -2.575424000 | -3.208512000 | 0.173574000  |
| N | -3.134998000 | -1.421798000 | 1.534521000  |
| H | -2.234329000 | -1.037110000 | 1.252733000  |
| H | 2.101952000  | -0.119805000 | -0.398910000 |
| C | -3.926704000 | -0.647039000 | 2.477716000  |

|   |              |              |              |
|---|--------------|--------------|--------------|
| C | 4.077315000  | -0.895630000 | -0.537069000 |
| H | -3.232870000 | -0.230005000 | 3.213897000  |
| H | -4.602535000 | -1.307246000 | 3.022714000  |
| C | -4.717077000 | 0.493436000  | 1.855712000  |
| C | -6.105126000 | 0.468067000  | 1.723824000  |
| C | -4.061241000 | 1.638220000  | 1.402691000  |
| C | -6.818100000 | 1.524256000  | 1.155581000  |
| C | -4.740293000 | 2.707084000  | 0.832660000  |
| C | -6.128166000 | 2.649673000  | 0.706398000  |
| H | 3.637496000  | -1.761335000 | -0.033532000 |
| H | 4.601934000  | -1.275636000 | -1.417285000 |
| C | 5.086385000  | -0.233848000 | 0.389335000  |
| C | 6.415793000  | -0.036066000 | 0.014617000  |
| C | 4.727135000  | 0.189083000  | 1.669234000  |
| C | 7.348811000  | 0.561948000  | 0.860679000  |
| C | 5.629361000  | 0.787786000  | 2.540545000  |
| C | 6.951552000  | 0.972987000  | 2.132351000  |
| F | 6.826418000  | -0.417425000 | -1.210207000 |
| F | 8.605707000  | 0.740963000  | 0.462273000  |
| F | 7.825044000  | 1.545811000  | 2.952548000  |
| F | 5.240670000  | 1.178721000  | 3.756105000  |
| F | 3.452722000  | 0.017796000  | 2.090395000  |
| F | -2.718159000 | 1.716339000  | 1.518453000  |
| F | -6.797970000 | -0.601036000 | 2.153301000  |
| F | -8.142053000 | 1.462504000  | 1.037894000  |
| F | -6.786654000 | 3.664120000  | 0.152350000  |
| F | -4.072500000 | 3.788631000  | 0.398965000  |

<sup>3</sup>TS<sub>R17</sub>

|    |              |              |              |
|----|--------------|--------------|--------------|
| Cu | -0.699980000 | -1.928510000 | -0.046500000 |
| C  | 0.254019000  | -0.503606000 | 2.545947000  |
| H  | 0.702879000  | 0.164343000  | 1.817859000  |
| C  | 0.447609000  | -0.345744000 | 3.916981000  |
| H  | 1.057900000  | 0.470964000  | 4.287639000  |
| C  | -0.150644000 | -1.257918000 | 4.785728000  |
| H  | -0.014499000 | -1.171130000 | 5.859705000  |
| C  | -0.926142000 | -2.290428000 | 4.256649000  |
| H  | -1.404821000 | -3.018081000 | 4.905290000  |

|   |              |              |              |
|---|--------------|--------------|--------------|
| C | -1.086398000 | -2.372796000 | 2.873427000  |
| C | -1.992439000 | -3.407632000 | 2.228208000  |
| H | -2.099107000 | -4.286899000 | 2.881752000  |
| H | -2.991453000 | -2.967207000 | 2.123848000  |
| C | -0.420707000 | -4.737141000 | 0.886132000  |
| H | -0.760686000 | -5.766473000 | 1.078637000  |
| H | 0.242223000  | -4.457376000 | 1.714208000  |
| C | 0.371547000  | -4.674252000 | -0.408320000 |
| C | 0.953314000  | -5.805544000 | -0.978818000 |
| H | 0.815340000  | -6.779670000 | -0.519276000 |
| C | 1.708526000  | -5.662097000 | -2.144210000 |
| H | 2.168397000  | -6.529530000 | -2.608526000 |
| C | 1.855263000  | -4.394084000 | -2.703896000 |
| H | 2.429545000  | -4.239968000 | -3.611277000 |
| C | 1.238278000  | -3.312121000 | -2.077106000 |
| H | 1.319867000  | -2.296642000 | -2.453006000 |
| C | -2.649041000 | -4.202200000 | 0.001415000  |
| H | -3.295648000 | -4.942782000 | 0.495305000  |
| H | -2.203510000 | -4.696323000 | -0.869976000 |
| C | -3.472516000 | -3.024436000 | -0.487634000 |
| C | -4.848221000 | -3.126939000 | -0.627131000 |
| H | -5.370576000 | -4.030460000 | -0.331548000 |
| C | -5.534900000 | -2.027327000 | -1.164459000 |
| H | -6.614514000 | -2.061822000 | -1.279803000 |
| C | -4.842824000 | -0.894952000 | -1.545527000 |
| H | -5.369875000 | -0.039748000 | -1.948169000 |
| C | -3.432905000 | -0.865284000 | -1.381012000 |
| C | -3.160765000 | 1.448162000  | -2.282663000 |
| N | -0.496788000 | -1.495252000 | 2.040782000  |
| N | -1.539787000 | -3.780175000 | 0.877329000  |
| N | 0.513653000  | -3.451490000 | -0.956640000 |
| N | -2.776744000 | -1.919573000 | -0.830870000 |
| N | -2.661192000 | 0.182415000  | -1.774723000 |
| H | -1.671747000 | 0.136014000  | -1.513054000 |
| O | -0.068982000 | -0.190800000 | -0.659248000 |
| O | 1.059029000  | -0.207632000 | -1.440827000 |
| C | 6.260060000  | 1.320010000  | -0.281750000 |
| C | 6.206527000  | 2.708493000  | -0.510673000 |
| C | 4.975571000  | 3.400641000  | -0.465483000 |

|   |              |              |              |
|---|--------------|--------------|--------------|
| C | 3.786621000  | 2.749175000  | -0.225387000 |
| C | 3.830595000  | 1.302259000  | -0.032054000 |
| C | 5.106496000  | 0.595708000  | -0.031666000 |
| H | 7.218568000  | 0.822281000  | -0.296783000 |
| H | 5.019670000  | 4.471011000  | -0.618117000 |
| H | 1.944339000  | 0.252552000  | -0.650750000 |
| O | 2.738613000  | 0.639018000  | 0.210952000  |
| C | 2.458529000  | 3.526025000  | -0.168721000 |
| C | 1.615427000  | 3.177748000  | -1.423779000 |
| C | 1.667375000  | 3.199486000  | 1.144400000  |
| C | 2.694316000  | 5.052479000  | -0.202227000 |
| H | 2.146794000  | 3.469632000  | -2.337302000 |
| H | 1.373941000  | 2.116702000  | -1.490882000 |
| H | 0.670182000  | 3.731253000  | -1.389590000 |
| H | 1.553181000  | 4.102016000  | 1.754050000  |
| H | 0.664790000  | 2.827327000  | 0.916986000  |
| H | 2.167863000  | 2.450715000  | 1.760551000  |
| H | 1.727381000  | 5.560209000  | -0.123848000 |
| H | 3.314572000  | 5.391885000  | 0.635228000  |
| H | 3.157896000  | 5.385292000  | -1.137535000 |
| C | 5.178829000  | -0.918616000 | 0.247465000  |
| C | 4.595073000  | -1.226606000 | 1.650445000  |
| C | 4.399495000  | -1.701319000 | -0.838006000 |
| C | 6.631470000  | -1.440337000 | 0.232647000  |
| H | 5.159219000  | -0.701342000 | 2.430157000  |
| H | 3.546976000  | -0.933822000 | 1.722704000  |
| H | 4.673263000  | -2.302017000 | 1.851145000  |
| H | 4.807996000  | -1.497148000 | -1.834956000 |
| H | 4.495927000  | -2.777803000 | -0.651739000 |
| H | 3.338688000  | -1.451277000 | -0.839948000 |
| H | 6.626376000  | -2.513565000 | 0.449256000  |
| H | 7.111386000  | -1.309728000 | -0.744281000 |
| H | 7.253970000  | -0.958431000 | 0.995203000  |
| O | 7.276612000  | 3.475879000  | -0.764945000 |
| C | 8.581338000  | 2.892298000  | -0.830444000 |
| H | 9.256618000  | 3.716687000  | -1.058565000 |
| H | 8.858139000  | 2.443547000  | 0.129678000  |
| H | 8.634224000  | 2.140542000  | -1.625282000 |
| H | -2.321204000 | 1.933705000  | -2.787839000 |

|   |              |             |              |
|---|--------------|-------------|--------------|
| H | -3.929824000 | 1.276460000 | -3.039424000 |
| C | -3.707957000 | 2.385252000 | -1.214763000 |
| C | -5.050624000 | 2.754287000 | -1.153693000 |
| C | -2.862533000 | 2.919620000 | -0.241494000 |
| C | -5.544161000 | 3.604644000 | -0.165174000 |
| C | -3.320325000 | 3.769974000 | 0.758513000  |
| C | -4.671919000 | 4.114689000 | 0.794100000  |
| F | -2.480032000 | 4.256932000 | 1.676858000  |
| F | -5.127033000 | 4.926421000 | 1.747671000  |
| F | -6.838197000 | 3.929114000 | -0.132872000 |
| F | -5.920187000 | 2.277221000 | -2.066004000 |
| F | -1.553987000 | 2.602788000 | -0.267171000 |

${}_3TS_{7d}^{7a}$

|    |              |             |              |
|----|--------------|-------------|--------------|
| Cu | 0.241580000  | 2.993306000 | 0.228506000  |
| C  | -0.531226000 | 1.580457000 | 2.934700000  |
| H  | -0.674089000 | 0.712365000 | 2.298153000  |
| C  | -0.835868000 | 1.534321000 | 4.293025000  |
| H  | -1.214949000 | 0.618455000 | 4.734803000  |
| C  | -0.653132000 | 2.687417000 | 5.055570000  |
| H  | -0.884395000 | 2.696435000 | 6.116478000  |
| C  | -0.181727000 | 3.838477000 | 4.425686000  |
| H  | -0.042546000 | 4.759522000 | 4.983623000  |
| C  | 0.108801000  | 3.804182000 | 3.060485000  |
| C  | 0.654920000  | 5.029652000 | 2.343122000  |
| H  | 0.430541000  | 5.934572000 | 2.929492000  |
| H  | 1.748169000  | 4.948092000 | 2.296906000  |
| C  | -1.240831000 | 5.519155000 | 0.847225000  |
| H  | -1.360469000 | 6.613666000 | 0.841722000  |
| H  | -1.766027000 | 5.151952000 | 1.737625000  |
| C  | -1.919214000 | 4.918127000 | -0.376743000 |
| C  | -2.958112000 | 5.589567000 | -1.022639000 |
| H  | -3.245373000 | 6.584867000 | -0.696867000 |
| C  | -3.621662000 | 4.964923000 | -2.078832000 |
| H  | -4.436225000 | 5.469135000 | -2.590134000 |
| C  | -3.219783000 | 3.687129000 | -2.465081000 |
| H  | -3.717155000 | 3.153646000 | -3.267296000 |
| C  | -2.157289000 | 3.095174000 | -1.787088000 |
| H  | -1.802253000 | 2.105591000 | -2.053829000 |

|    |              |              |              |
|----|--------------|--------------|--------------|
| C  | 1.062028000  | 5.817124000  | 0.045105000  |
| H  | 1.372840000  | 6.799304000  | 0.433100000  |
| H  | 0.496105000  | 6.005949000  | -0.875471000 |
| C  | 2.290308000  | 5.002727000  | -0.326367000 |
| C  | 3.502972000  | 5.644048000  | -0.529886000 |
| H  | 3.597403000  | 6.708796000  | -0.346630000 |
| C  | 4.589062000  | 4.886357000  | -0.983339000 |
| H  | 5.556719000  | 5.353086000  | -1.141519000 |
| C  | 4.428430000  | 3.535152000  | -1.224844000 |
| H  | 5.265167000  | 2.935164000  | -1.556901000 |
| C  | 3.161675000  | 2.947246000  | -1.002328000 |
| N  | -0.059205000 | 2.682310000  | 2.325829000  |
| N  | 0.163553000  | 5.115085000  | 0.965496000  |
| N  | -1.518578000 | 3.688868000  | -0.765741000 |
| N  | 2.117593000  | 3.671842000  | -0.533385000 |
| N  | 2.933059000  | 1.615455000  | -1.246363000 |
| O  | -0.008795000 | 0.436413000  | -0.604649000 |
| O  | -0.565638000 | -0.413452000 | 0.193792000  |
| Cu | -0.064920000 | -2.354095000 | 0.140034000  |
| C  | 1.899624000  | -1.284363000 | 2.339624000  |
| H  | 1.586830000  | -0.314224000 | 1.968458000  |
| C  | 2.867494000  | -1.401798000 | 3.332439000  |
| H  | 3.319127000  | -0.512752000 | 3.759642000  |
| C  | 3.242463000  | -2.679377000 | 3.749950000  |
| H  | 3.999478000  | -2.812578000 | 4.516828000  |
| C  | 2.636473000  | -3.787381000 | 3.159608000  |
| H  | 2.914021000  | -4.795514000 | 3.451520000  |
| C  | 1.664152000  | -3.586595000 | 2.179865000  |
| C  | 0.920292000  | -4.745247000 | 1.544708000  |
| H  | 1.528999000  | -5.659839000 | 1.577198000  |
| H  | 0.015709000  | -4.942374000 | 2.132126000  |
| C  | 1.580733000  | -4.549993000 | -0.822518000 |
| H  | 1.780547000  | -5.600423000 | -1.078346000 |
| H  | 2.490715000  | -4.145410000 | -0.364423000 |
| C  | 1.266647000  | -3.745816000 | -2.070379000 |
| C  | 1.707798000  | -4.133987000 | -3.335048000 |
| H  | 2.260251000  | -5.060412000 | -3.458483000 |
| C  | 1.425196000  | -3.317969000 | -4.431175000 |
| H  | 1.754641000  | -3.603163000 | -5.425731000 |

|   |              |              |              |
|---|--------------|--------------|--------------|
| C | 0.705262000  | -2.139790000 | -4.230689000 |
| H | 0.455938000  | -1.482894000 | -5.057234000 |
| C | 0.292853000  | -1.824762000 | -2.938068000 |
| H | -0.267989000 | -0.920692000 | -2.724176000 |
| C | -0.720013000 | -5.184685000 | -0.230837000 |
| H | -0.609496000 | -6.257026000 | -0.017526000 |
| H | -0.824177000 | -5.082794000 | -1.317081000 |
| C | -1.970971000 | -4.640612000 | 0.429873000  |
| C | -3.007385000 | -5.492310000 | 0.776761000  |
| H | -2.911819000 | -6.564077000 | 0.640940000  |
| C | -4.185303000 | -4.924774000 | 1.281755000  |
| H | -5.027582000 | -5.557056000 | 1.546167000  |
| C | -4.277713000 | -3.555305000 | 1.439468000  |
| H | -5.191831000 | -3.108533000 | 1.808363000  |
| C | -3.163972000 | -2.750100000 | 1.101032000  |
| N | 1.301727000  | -2.350421000 | 1.783037000  |
| N | 0.488970000  | -4.432309000 | 0.166920000  |
| N | 0.565952000  | -2.608480000 | -1.883256000 |
| N | -2.031546000 | -3.296800000 | 0.592147000  |
| N | -3.154457000 | -1.393911000 | 1.296855000  |
| H | -2.416144000 | -0.893860000 | 0.815298000  |
| H | 1.987686000  | 1.290632000  | -1.082880000 |
| C | -4.346196000 | -0.604358000 | 1.587677000  |
| C | 3.761153000  | 0.794541000  | -2.123128000 |
| H | -3.993099000 | 0.380794000  | 1.907145000  |
| H | -4.879660000 | -1.034876000 | 2.436679000  |
| C | -5.301164000 | -0.441261000 | 0.415785000  |
| C | -6.619164000 | -0.894913000 | 0.449306000  |
| C | -4.882386000 | 0.192652000  | -0.753191000 |
| C | -7.489091000 | -0.727280000 | -0.628535000 |
| C | -5.720128000 | 0.378085000  | -1.844983000 |
| C | -7.036047000 | -0.083318000 | -1.779788000 |
| H | 3.087599000  | 0.154403000  | -2.701115000 |
| H | 4.288513000  | 1.427834000  | -2.840181000 |
| C | 4.766284000  | -0.091633000 | -1.403619000 |
| C | 6.144400000  | 0.119280000  | -1.448085000 |
| C | 4.331998000  | -1.203872000 | -0.686622000 |
| C | 7.049592000  | -0.722027000 | -0.798494000 |
| C | 5.201462000  | -2.067603000 | -0.036071000 |



|   |              |              |              |
|---|--------------|--------------|--------------|
| C | 6.574016000  | -1.825711000 | -0.090608000 |
| F | 6.639761000  | 1.163829000  | -2.133149000 |
| F | 8.356099000  | -0.481796000 | -0.857408000 |
| F | 7.419710000  | -2.641177000 | 0.531079000  |
| F | 4.724066000  | -3.135091000 | 0.626995000  |
| F | 3.007067000  | -1.470636000 | -0.629053000 |
| F | -3.608139000 | 0.639758000  | -0.831536000 |
| F | -7.078317000 | -1.525793000 | 1.544520000  |
| F | -8.739211000 | -1.177569000 | -0.564543000 |
| F | -7.849698000 | 0.084453000  | -2.816663000 |
| F | -5.275242000 | 0.991605000  | -2.949211000 |
